# Supplementary material for: Identification and validation of differentially expressed transcripts by RNA-sequencing of formalin-fixed, paraffin-embedded (FFPE) lung tissue from patients with Idiopathic Pulmonary Fibrosis
Source: BMC Pulm Med. 2017 Jan 12;17:15. doi: 10.1186/s12890-016-0356-4 (PMC5228096; doi:10.1186/s12890-016-0356-4)
Supplement: Additional file 1: Table S1. — FPKM p-value matrices. (XLS 15268 kb) [file 12890_2016_356_MOESM1_ESM.xls]

## Sheet: FPKMs_pvalue_matrices
test_id	gene_id	gene	locus	sample_1	sample_2	status	value_1	value_2	log2(fold_change)	fold_change	test_stat	p_value	q_value	significant	fold_change_annotation	gene_tss_type	SL32670	SL32671	SL32674	SL32677	SL32679	SL32680	SL32683	SL71047	SL71048	SL71049	SL71050
A1BG	A1BG	A1BG	chr19:58858171-58874214	IPF	CTRL	OK	3.46689	2.36592	0.55124	1.46534	-0.359374	0.4012	0.591396	no	IPF vs CONTROL UP	unique	2.65675	4.26596	3.24176	2.43306	5.2179	2.98592	2.12778	2.01576	2.20778	3.37368	2.10461
A1BG-AS1	A1BG-AS1	A1BG-AS1	chr19:58858171-58874214	IPF	CTRL	OK	5.11905	1.63734	1.64452	3.12644	-0.967225	0.025	0.0803916	no	IPF vs CONTROL UP	unique	6.44157	6.30151	3.22446	4.60247	6.59066	3.55363	1.54066	2.01273	0.552079	2.16986	1.91138
A1CF	A1CF	A1CF	chr10:52559168-52645435	IPF	CTRL	NOTEST	0.0905526	0.0701296	0.368734	1.29122	0	1	1	no	IPF vs CONTROL UP	unique	0.0608273	0.0692557	0.0925823	0.127503	0.0521675	0.14098	0.0312308	0.0948883	0.058578	0.0641528	0.101798
A2M	A2M	A2M	chr12:9217772-9268558	IPF	CTRL	OK	695.114	1076.61	-0.631169	-1.54882	0.416431	0.3356	0.528648	no	IPF vs CONTROL DOWN	unique	794.359	665.98	1447.11	421.123	428.59	413.52	1072.19	907.754	1078.81	1432.81	891.463
A2M-AS1	A2M-AS1	A2M-AS1	chr12:9217772-9268558	IPF	CTRL	OK	15.6878	7.70086	1.02655	2.03715	-0.0410173	0.4505	0.636292	no	IPF vs CONTROL UP	unique	16.5167	18.13	12.094	23.81	6.05289	17.5233	5.01275	8.572	8.47514	7.12771	9.31668
A2ML1	A2ML1	A2ML1	chr12:8975149-9029381	IPF	CTRL	NOTEST	0.15509	0.0805642	0.944891	1.92504	0	1	1	no	IPF vs CONTROL UP	unique	0.228546	0.187521	0.184748	0	0.0650954	0.264627	0.0281817	0.0788373	0.219062	0.0400035	0.0367364
A2MP1	A2MP1	A2MP1	chr12:9381128-9386803	IPF	CTRL	NOTEST	1.13927	0.631849	0.850463	1.80308	0	1	1	no	IPF vs CONTROL UP	unique	1.53766	1.45903	0.78283	1.42743	0.441404	1.18729	0.395917	1.06495	0.739688	0.271087	0.687604
A4GALT	A4GALT	A4GALT	chr22:43088126-43116876	IPF	CTRL	OK	16.4819	14.3232	0.202527	1.15071	-0.00605427	0.98895	0.995455	no	IPF vs CONTROL UP	unique	18.878	16.5218	13.6573	10.2182	22.1555	17.4606	11.5878	12.1527	15.5948	18.596	13.6848
A4GNT	A4GNT	A4GNT	chr3:137842559-137851229	IPF	CTRL	NOTEST	0.297249	0.33349	-0.165969	-1.12192	0	1	1	no	IPF vs CONTROL DOWN	unique	0.168159	0.191467	0.410302	0.234459	0	0.779109	0.475653	0.174752	0.323693	0.355292	0.338059
AA06	AA06	AA06	chr17:31340105-32483825	IPF	CTRL	NOTEST	0.248402	0	Inf	0	0	1	1	no	IPF vs CONTROL UP (0)	unique	0	0	0	1.49041	0	0	0	0	0	0	0
AAAS	AAAS	AAAS	chr12:53701239-53715412	IPF	CTRL	OK	13.1061	10.4485	0.326946	1.25436	-0.609317	0.1521	0.306079	no	IPF vs CONTROL UP	unique	11.3205	16.7955	9.31519	10.8243	17.2689	13.1125	12.1418	13.6133	7.26574	10.2502	8.97152
AACS	AACS	AACS	chr12:125549924-125627871	IPF	CTRL	OK	5.97965	4.81378	0.312893	1.2422	-0.184592	0.66625	0.805569	no	IPF vs CONTROL UP	unique	7.12618	3.85896	5.50535	6.55087	6.19257	6.64399	4.41936	5.60095	3.76518	4.81408	5.46931
AACSP1	AACSP1	AACSP1	chr5:178191863-178203277	IPF	CTRL	NOTEST	0.276722	0.167725	0.722341	1.64986	0	1	1	no	IPF vs CONTROL UP	unique	0.13534	0.308195	0.165018	0	0.581477	0.4703	0.104355	0	0.390832	0.0714529	0.271983
AADAC	AADAC	AADAC	chr3:151347319-151546276	IPF	CTRL	OK	2.68924	0.767839	1.80832	3.50234	-0.796662	0.1276	0.269372	no	IPF vs CONTROL UP	unique	1.68072	2.12632	1.82321	4.42516	3.05176	3.02825	2.16153	0	1.07833	0.0986679	0.500669
AADACL2	AADACL2	AADACL2	chr3:151347319-151546276	IPF	CTRL	OK	4.99523	1.15522	2.11239	4.32406	-1.11694	0.00815	0.0329326	yes	IPF vs CONTROL UP	unique	3.81939	5.49326	1.47229	0.840426	10.8953	7.45071	1.81008	0.417754	0.967235	0.424929	2.15609
AADACL3	AADACL3	AADACL3	chr1:12776117-12788726	IPF	CTRL	NOTEST	0	0	0	1	0	1	1	no	IPF vs. CONTROL EQUAL(0)	unique	0	0	0	0	0	0	0	0	0	0	0
AADACL4	AADACL4	AADACL4	chr1:12704565-12727097	IPF	CTRL	NOTEST	0.0723805	0.0098111	2.88311	7.37741	0	1	1	no	IPF vs CONTROL UP	unique	0	0.434283	0	0	0	0	0.0490555	0	0	0	0
AADAT	AADAT	AADAT	chr4:170981372-171011372	IPF	CTRL	OK	3.40937	2.30304	0.565962	1.48037	-0.577115	0.1765	0.341438	no	IPF vs CONTROL UP	unique	1.25982	3.15573	1.68942	6.15224	4.11297	4.08601	2.20152	2.48789	2.30421	2.32761	2.19398
AAED1	AAED1	AAED1	chr9:99403532-99417599	IPF	CTRL	OK	7.95974	9.43523	-0.245336	-1.18537	0.630922	0.13905	0.286283	no	IPF vs CONTROL DOWN	unique	8.0238	7.13765	9.03711	6.28527	8.85255	8.42208	12.9113	4.42844	13.5098	10.6085	5.71812
AAGAB	AAGAB	AAGAB	chr15:67493012-67819641	IPF	CTRL	OK	12.8564	8.8058	0.545956	1.45999	-0.374015	0.3733	0.565852	no	IPF vs CONTROL UP	unique	13.7988	10.4944	11.4939	12.1849	13.9436	15.2226	9.81966	7.12297	9.76026	8.717	8.60913
AAK1	AAK1	AAK1	chr2:69685126-69870977	IPF	CTRL	OK	12.7287	8.89588	0.516871	1.43085	-0.676727	0.1115	0.244764	no	IPF vs CONTROL UP	unique	13.0214	14.0902	10.2788	14.734	9.2092	15.0384	8.90956	9.96269	9.83711	7.24423	8.52583
AAMDC	AAMDC	AAMDC	chr11:77532207-77583398	IPF	CTRL	OK	2.77952	11.7055	-2.07428	-4.21135	1.54109	0.0016	0.00886554	yes	IPF vs CONTROL DOWN	unique	1.42676	4.062	4.83257	0.986773	1.23911	4.1299	14.4254	6.65908	10.9603	12.536	13.9469
AAMP	AAMP	AAMP	chr2:219128851-219134893	IPF	CTRL	OK	22.3656	31.5988	-0.498588	-1.41283	1.23213	0.00405	0.0189129	yes	IPF vs CONTROL DOWN	unique	26.7191	18.1401	23.485	16.1977	31.3904	18.2615	30.9382	32.5958	23.48	36.7282	34.252
AANAT	AANAT	AANAT	chr17:74449432-74466199	IPF	CTRL	NOTEST	0.954331	0.629693	0.599842	1.51555	0	1	1	no	IPF vs CONTROL UP	unique	0.610818	1.39103	0.560229	0.872175	1.57952	0.712214	0.664326	0.634452	0.299671	1.06329	0.486725
AAR2	AAR2	AAR2	chr20:34824338-34844863	IPF	CTRL	OK	13.6934	15.5204	-0.180683	-1.13342	0.687743	0.11	0.242349	no	IPF vs CONTROL DOWN	unique	13.51	12.5725	12.5294	12.4571	15.0356	16.0558	14.8518	15.7836	15.4932	15.7499	15.7234
AARD	AARD	AARD	chr8:117950463-117956239	IPF	CTRL	OK	2.02154	1.46672	0.46286	1.37827	-0.231841	0.5883	0.749299	no	IPF vs CONTROL UP	unique	1.99982	0	6.60745	1.16181	0.429848	1.93031	1.07131	1.90504	0.962376	1.49642	1.89846
AARS	AARS	AARS	chr16:70286296-70323412	IPF	CTRL	OK	22.1029	21.0149	0.0728228	1.05177	0.0450322	0.9118	0.956123	no	IPF vs CONTROL UP	unique	19.8458	25.838	22.4425	16.9834	30.8162	16.6916	24.798	20.8092	17.5289	22.1235	19.815
AARS2	AARS2	AARS2	chr6:44266462-44281063	IPF	CTRL	OK	7.09207	5.66531	0.324051	1.25184	-0.291549	0.48605	0.665808	no	IPF vs CONTROL UP	unique	5.49328	9.7896	5.30763	6.67066	9.27377	6.01746	5.47253	5.64878	5.17448	5.63642	6.39435
AARSD1	AARSD1	AARSD1	chr17:41102542-41132545	IPF	CTRL	OK	4.20897	4.51307	-0.10064	-1.07225	0.301371	0.47775	0.658547	no	IPF vs CONTROL DOWN	unique	5.1262	5.58305	5.44333	2.79453	1.91823	4.38851	5.7932	4.3364	3.8603	4.24157	4.33388
AASDH	AASDH	AASDH	chr4:57204456-57253638	IPF	CTRL	OK	6.02841	3.42086	0.817421	1.76225	-1.25941	0.00355	0.0170187	yes	IPF vs CONTROL UP	unique	4.52789	8.56155	4.9246	6.77267	5.48323	5.90055	3.63378	3.86636	3.19178	3.32694	3.08543
AASDHPPT	AASDHPPT	AASDHPPT	chr11:105921824-105969419	IPF	CTRL	OK	12.7379	9.1142	0.482938	1.39759	-0.519087	0.22345	0.400977	no	IPF vs CONTROL UP	unique	11.9715	10.1651	13.0427	12.0352	14.2881	14.9247	11.1025	10.7565	8.07469	7.49495	8.14235
AASS	AASS	AASS	chr7:121713597-121784344	IPF	CTRL	OK	17.7504	14.3599	0.305805	1.23611	-0.262325	0.53165	0.703096	no	IPF vs CONTROL UP	unique	19.076	17.1439	16.8285	18.2584	15.2857	19.9101	15.3235	12.282	21.726	10.9007	11.5675
AATF	AATF	AATF	chr17:35306174-35414171	IPF	CTRL	OK	7.50707	9.66157	-0.364008	-1.287	0.80628	0.0554	0.145527	no	IPF vs CONTROL DOWN	unique	6.8738	6.10465	10.3092	7.09528	10.0415	4.61797	10.6358	6.8583	10.8512	10.0164	9.94613
AATK	AATK	AATK	chr17:79008946-79156964	IPF	CTRL	OK	8.13443	21.4338	-1.39778	-2.63495	2.02728	5e-05	0.000459061	yes	IPF vs CONTROL DOWN	unique	12.7738	6.88893	6.30151	12.9883	3.79767	6.05635	16.4531	24.098	19.1258	24.2852	23.207
AATK-AS1	AATK-AS1	AATK-AS1	chr17:79008946-79156964	IPF	CTRL	NOTEST	0.145072	0.0495186	1.55073	2.92966	0	1	1	no	IPF vs CONTROL UP	unique	0	0	0	0.265446	0.163812	0.441177	0.146965	0	0	0.100628	0
ABAT	ABAT	ABAT	chr16:8768443-8878432	IPF	CTRL	OK	4.59064	3.02869	0.600003	1.51572	-0.665322	0.12155	0.260189	no	IPF vs CONTROL UP	unique	4.74357	3.19917	4.87427	4.26313	5.39314	5.07055	3.56613	2.89763	3.24429	2.75207	2.68331
ABCA1	ABCA1	ABCA1	chr9:107543283-107690527	IPF	CTRL	OK	24.8508	26.853	-0.111793	-1.08057	0.474938	0.2555	0.439388	no	IPF vs CONTROL DOWN	unique	21.7622	30.3074	27.6599	27.181	19.8134	22.3808	27.7011	23.157	21.3454	36.7466	25.315
ABCA10	ABCA10	ABCA10	chr17:67144147-67323323	IPF	CTRL	OK	13.1474	4.14133	1.66661	3.17467	-1.60849	0.0003	0.00220617	yes	IPF vs CONTROL UP	unique	3.45225	19.602	8.88043	16.4075	12.9878	17.5543	4.74552	4.7545	4.05833	4.66832	2.48
ABCA11P	ABCA11P	ABCA11P	chr4:419223-533320	IPF	CTRL	OK	8.52357	5.59807	0.606529	1.52259	-0.288093	0.503	0.679745	no	IPF vs CONTROL UP	unique	8.10311	8.08712	6.52983	11.3283	10.6833	6.40978	4.95613	7.39188	3.76476	4.70975	7.16782
ABCA12	ABCA12	ABCA12	chr2:215796265-216003151	IPF	CTRL	NOTEST	0.362847	0.0689268	2.39622	5.26424	0	1	1	no	IPF vs CONTROL UP	unique	0.496517	0.119442	0.170998	0.433376	0.345869	0.610881	0.0897438	0	0.101025	0.0368683	0.116997
ABCA13	ABCA13	ABCA13	chr7:48211056-48687091	IPF	CTRL	OK	16.1231	2.46973	2.70671	6.5283	-3.45638	5e-05	0.000459061	yes	IPF vs CONTROL UP	unique	6.64642	19.8386	2.36454	2.73833	50.8684	14.2825	5.06962	0.237716	0.975092	0.800396	5.26582
ABCA17P	ABCA17P	ABCA17P	chr16:2390922-2476700	IPF	CTRL	NOTEST	0.140936	0.178219	-0.338616	-1.26454	0	1	1	no	IPF vs CONTROL DOWN	unique	0.0684137	0.389469	0	0.191053	0.117429	0.0792484	0.122963	0.142242	0	0.396916	0.228974
ABCA2	ABCA2	ABCA2	chr9:139901685-139931234	IPF	CTRL	OK	14.3492	11.5625	0.31152	1.24101	-0.244844	0.56825	0.734131	no	IPF vs CONTROL UP	unique	12.4935	15.4736	9.2414	17.6297	18.6445	12.6128	9.87083	14.6004	9.55195	13.1644	10.625
ABCA3	ABCA3	ABCA3	chr16:2325878-2390747	IPF	CTRL	OK	33.367	117.383	-1.81473	-3.51793	3.20816	5e-05	0.000459061	yes	IPF vs CONTROL DOWN	unique	43.2944	18.4789	74.3894	47.9133	6.5021	9.62361	146.964	132.409	94.805	96.9034	115.832
ABCA4	ABCA4	ABCA4	chr1:94458393-94586705	IPF	CTRL	NOTEST	0.325565	0.134604	1.27422	2.41869	0	1	1	no	IPF vs CONTROL UP	unique	0.618478	0.396098	0.188209	0.161993	0.364724	0.223888	0.178574	0.200945	0.18612	0.0815147	0.0258664
ABCA5	ABCA5	ABCA5	chr17:67144147-67323323	IPF	CTRL	OK	16.4743	5.57152	1.56408	2.95688	-2.00592	5e-05	0.000459061	yes	IPF vs CONTROL UP	unique	11.5038	15.2518	12.8049	15.2	25.0331	19.0524	7.91965	4.63201	5.31881	4.91669	5.07046
ABCA6	ABCA6	ABCA6	chr17:67074846-67138015	IPF	CTRL	OK	30.6864	22.9147	0.421326	1.33916	-0.638112	0.1346	0.279783	no	IPF vs CONTROL UP	unique	11.8333	52.6673	31.4023	39.8138	24.4133	23.9882	21.2777	23.654	25.9486	28.2496	15.4435
ABCA7	ABCA7	ABCA7	chr19:1040101-1065570	IPF	CTRL	OK	14.1077	5.18268	1.44472	2.72209	-2.30715	5e-05	0.000459061	yes	IPF vs CONTROL UP	unique	8.73136	24.9476	5.69393	14.6938	19.1169	11.4629	5.84793	5.18731	4.4843	6.55427	3.83961
ABCA8	ABCA8	ABCA8	chr17:66863430-66951533	IPF	CTRL	OK	24.7972	21.1095	0.232281	1.17469	-0.234423	0.58195	0.744528	no	IPF vs CONTROL UP	unique	10.491	31.1353	33.8682	31.3191	17.3187	24.6508	21.684	18.9191	22.6461	26.4263	15.8722
ABCA9	ABCA9	ABCA9	chr17:66970772-67057136	IPF	CTRL	OK	14.2315	9.69949	0.55311	1.46725	-0.938069	0.02575	0.0821754	no	IPF vs CONTROL UP	unique	2.88332	28.1606	10.0092	20.0739	12.6766	11.5856	8.22173	9.69561	11.4531	13.2781	5.84893
ABCB1	ABCB1	ABCB1	chr7:87133178-87461613	IPF	CTRL	OK	3.7159	1.29984	1.51538	2.85875	-1.85818	0.0001	0.000852984	yes	IPF vs CONTROL UP	unique	3.51281	4.06853	4.16692	3.38312	2.18282	4.98122	1.33723	0.818538	1.80787	1.72478	0.810762
ABCB10	ABCB10	ABCB10	chr1:229652328-229694442	IPF	CTRL	OK	8.09335	5.72511	0.499435	1.41366	-0.735696	0.08365	0.199216	no	IPF vs CONTROL UP	unique	8.41425	7.71506	6.34863	8.73288	7.86128	9.48802	6.92176	5.41853	5.23375	6.16649	4.88501
ABCB11	ABCB11	ABCB11	chr2:169779448-169887833	IPF	CTRL	NOTEST	0.0935172	0.0376548	1.3124	2.48354	0	1	1	no	IPF vs CONTROL UP	unique	0	0.272342	0	0.0835084	0.205253	0	0.0460567	0.0621677	0	0	0.0800494
ABCB4	ABCB4	ABCB4	chr7:87031360-87105019	IPF	CTRL	NOTEST	0.388172	0.118624	1.7103	3.2723	0	1	1	no	IPF vs CONTROL UP	unique	0.300318	0.854866	0.352326	0	0.386667	0.434853	0.077118	0.0780345	0.0722754	0.114384	0.251306
ABCB5	ABCB5	ABCB5	chr7:20655244-20796637	IPF	CTRL	NOTEST	0.189715	0.248391	-0.388784	-1.30929	0	1	1	no	IPF vs CONTROL DOWN	unique	0.261645	0.223226	0.0796411	0	0.498007	0.0757686	0.145247	0.0679988	0.292327	0.182842	0.553542
ABCB6	ABCB6	ABCB6	chr2:220074487-220083712	IPF	CTRL	OK	4.93168	3.07763	0.680258	1.60243	-0.740319	0.0849	0.20137	no	IPF vs CONTROL UP	unique	5.95012	5.46346	3.9173	3.61662	4.86193	5.78065	2.3419	3.19225	2.49466	3.69655	3.66281
ABCB7	ABCB7	ABCB7	chrX:74273006-74376175	IPF	CTRL	OK	5.39149	5.08284	0.0850493	1.06072	0.0809495	0.84535	0.919466	no	IPF vs CONTROL UP	unique	4.16254	5.1264	5.55399	5.96579	4.92533	6.61488	6.97419	4.96617	4.11205	5.25819	4.10359
ABCB8	ABCB8	ABCB8	chr7:150725509-150744869	IPF	CTRL	OK	10.2288	6.75294	0.599044	1.51471	-0.785144	0.0663	0.166951	no	IPF vs CONTROL UP	unique	10.9806	9.65441	5.90558	14.056	9.89368	10.8823	6.57787	6.97609	4.99286	7.17417	8.04371
ABCB9	ABCB9	ABCB9	chr12:123405497-123451056	IPF	CTRL	OK	2.36603	1.33209	0.82877	1.77617	-0.511887	0.22835	0.407069	no	IPF vs CONTROL UP	unique	2.44768	2.40827	2.63376	2.38179	1.55706	2.7676	1.69753	1.05766	1.16412	1.71937	1.02179
ABCC1	ABCC1	ABCC1	chr16:16043433-16236930	IPF	CTRL	OK	28.4169	21.1636	0.425164	1.34273	-0.559798	0.18	0.346307	no	IPF vs CONTROL UP	unique	29.3908	34.1029	19.4939	30.7298	26.8438	29.9405	19.2252	20.8055	20.3111	25.7503	19.7261
ABCC10	ABCC10	ABCC10	chr6:43395291-43423786	IPF	CTRL	OK	15.2409	8.16371	0.90065	1.86691	-1.51737	0.00035	0.00252483	yes	IPF vs CONTROL UP	unique	17.2963	14.9293	10.1283	18.3239	14.3348	16.4327	8.825	8.82862	6.14472	8.74899	8.27122
ABCC11	ABCC11	ABCC11	chr16:48200821-48269088	IPF	CTRL	NOTEST	0.047766	0.0156734	1.60767	3.04759	0	1	1	no	IPF vs CONTROL UP	unique	0.0640785	0	0.0780486	0.0894794	0.0549894	0	0.0164518	0	0	0.061915	0
ABCC12	ABCC12	ABCC12	chr16:48116883-48180681	IPF	CTRL	NOTEST	0.0290801	0.0259314	0.165334	1.12143	0	1	1	no	IPF vs CONTROL UP	unique	0	0	0.0335749	0.077021	0	0.0638847	0.0141577	0.0573353	0	0.0581638	0
ABCC13	ABCC13	ABCC13	chr21:15646119-15673692	IPF	CTRL	NOTEST	0.173251	1.00653	-2.53846	-5.80967	0	1	1	no	IPF vs CONTROL DOWN	unique	0.102838	0	0.24179	0.575753	0	0.119122	1.43644	0.427578	1.13658	0.420276	1.61177
ABCC2	ABCC2	ABCC2	chr10:101542462-101611662	IPF	CTRL	NOTEST	0.581056	0.188543	1.62378	3.08182	0	1	1	no	IPF vs CONTROL UP	unique	0.395197	0.964195	0.309341	0.630756	0.532864	0.653983	0.260881	0.234774	0.163088	0.208401	0.0755722
ABCC3	ABCC3	ABCC3	chr17:48712217-48769063	IPF	CTRL	OK	15.8729	8.07588	0.974876	1.96547	-1.68543	0.0001	0.000852984	yes	IPF vs CONTROL UP	unique	24.0419	6.21886	8.33575	27.3918	10.7792	18.47	17.8319	3.78563	5.75925	7.9425	5.06012
ABCC4	ABCC4	ABCC4	chr13:95672082-95953687	IPF	CTRL	OK	10.8137	12.9387	-0.258829	-1.19651	0.44306	0.3063	0.498006	no	IPF vs CONTROL DOWN	unique	11.558	6.31502	9.6174	14.1064	11.7764	11.5091	14.2099	15.6004	9.36838	17.2244	8.29038
ABCC5	ABCC5	ABCC5	chr3:183637723-183735727	IPF	CTRL	OK	56.3932	16.1401	1.80487	3.49399	-2.86721	5e-05	0.000459061	yes	IPF vs CONTROL UP	unique	47.1272	50.3127	32.8283	55.6475	64.0512	88.3925	20.6303	14.5874	13.1079	14.0664	18.3084
ABCC5-AS1	ABCC5-AS1	ABCC5-AS1	chr3:183637723-183735727	IPF	CTRL	OK	2.67548	0.10573	4.66133	25.3047	-0.372552	0.08515	0.201742	no	IPF vs CONTROL UP	unique	7.05204	1.78468	0.966281	2.16549	1.36278	2.72158	0	0	0	0	0.528652
ABCC6	ABCC6	ABCC6	chr16:16243421-16317328	IPF	CTRL	OK	8.48967	8.6825	-0.032402	-1.02271	0.354234	0.3642	0.556778	no	IPF vs CONTROL DOWN	unique	8.98496	6.26538	6.75142	8.36018	6.09527	14.4808	12.9675	8.4834	4.78842	8.60843	8.56474
ABCC6P1	ABCC6P1	ABCC6P1	chr16:18582569-18609607	IPF	CTRL	NOTEST	0.896432	0.43759	1.03461	2.04856	0	1	1	no	IPF vs CONTROL UP	unique	0.106777	0.972596	0.78076	1.34108	1.55896	0.618419	0.713231	0.332962	0.20559	0.507141	0.429028
ABCC6P2	ABCC6P2	ABCC6P2	chr16:14916288-14918559	IPF	CTRL	NOTEST	1.25502	0.504286	1.3154	2.48871	0	1	1	no	IPF vs CONTROL UP	unique	1.41084	1.07103	0.288384	3.26406	0.406598	1.08921	0.485903	0	0.904096	0.499044	0.632385
ABCC8	ABCC8	ABCC8	chr11:17414431-17498449	IPF	CTRL	NOTEST	0.214447	0.27462	-0.356813	-1.28059	0	1	1	no	IPF vs CONTROL DOWN	unique	0.171912	0	0.244212	0.160053	0.245849	0.464658	0.720843	0.0595741	0.110357	0.0604373	0.421888
ABCC9	ABCC9	ABCC9	chr12:21950323-22089628	IPF	CTRL	OK	10.9466	11.0437	-0.0127363	-1.00887	0.249874	0.5551	0.722938	no	IPF vs CONTROL DOWN	unique	7.51161	10.3113	16.8534	10.6802	11.7096	8.61342	12.817	11.3587	9.3186	13.5511	8.17287
ABCD1	ABCD1	ABCD1	chrX:152990322-153010216	IPF	CTRL	OK	4.8716	5.99796	-0.300074	-1.23121	0.928995	0.02585	0.0824078	no	IPF vs CONTROL DOWN	unique	5.33866	4.1119	3.87306	6.0284	4.78482	5.09279	4.5968	5.8762	5.8205	6.9162	6.78009
ABCD2	ABCD2	ABCD2	chr12:39945021-40013843	IPF	CTRL	OK	2.42555	0.529539	2.1955	4.5805	-2.29699	5e-05	0.000459061	yes	IPF vs CONTROL UP	unique	2.29297	2.06427	1.16866	2.83002	3.29417	2.90322	0.629684	0.443506	0.308087	0.731087	0.535332
ABCD3	ABCD3	ABCD3	chr1:94883932-94984219	IPF	CTRL	OK	13.5931	11.0758	0.295468	1.22728	-0.102117	0.80415	0.89606	no	IPF vs CONTROL UP	unique	13.0948	9.63924	11.5363	13.2152	19.2915	14.7815	14.9569	11.0034	9.5328	9.65599	10.2297
ABCD4	ABCD4	ABCD4	chr14:74751979-74769767	IPF	CTRL	OK	10.7292	7.67709	0.482916	1.39757	-0.847271	0.04905	0.132736	no	IPF vs CONTROL UP	unique	8.33464	13.9436	8.3133	9.07418	13.6254	11.0843	6.77501	6.77067	5.99606	9.1796	9.66411
ABCE1	ABCE1	ABCE1	chr4:145915726-146050676	IPF	CTRL	OK	8.22477	6.4572	0.349068	1.27374	-0.211903	0.61585	0.771161	no	IPF vs CONTROL UP	unique	9.20162	6.84458	8.15859	8.01242	8.50108	8.63035	6.40097	6.25268	8.22698	4.82059	6.58476
ABCF1	ABCF1	ABCF1	chr6_ssto_hap7:1871447-1891586	IPF	CTRL	OK	1.56645	1.96065	-0.323829	-1.25165	0.98854	0.0207	0.0693771	no	IPF vs CONTROL DOWN	multiple	1.52521	1.48491	1.66347	1.39119	1.59544	1.73847	2.0038	1.93126	1.89499	1.94719	2.026
ABCF2	ABCF2	ABCF2	chr7:150904922-150924317	IPF	CTRL	OK	7.568	7.50356	0.0123367	1.00859	0.286032	0.5049	0.681766	no	IPF vs CONTROL UP	unique	7.79375	7.20993	7.78277	8.89488	8.08421	5.64248	7.81208	8.28511	7.42276	6.56664	7.43123
ABCF3	ABCF3	ABCF3	chr3:183903862-183911795	IPF	CTRL	OK	11.5132	12.5757	-0.127347	-1.09228	0.328035	0.4415	0.627654	no	IPF vs CONTROL DOWN	unique	11.2244	11.1018	11.7459	11.549	12.9521	10.5063	13.9245	12.8452	9.71404	13.9423	12.4526
ABCG1	ABCG1	ABCG1	chr21:43619798-43717354	IPF	CTRL	OK	14.327	17.1813	-0.262106	-1.19923	0.666177	0.11955	0.257032	no	IPF vs CONTROL DOWN	unique	14.7116	14.9609	17.1078	16.337	11.6291	11.2153	32.4222	12.2962	8.5222	18.7089	13.9569
ABCG2	ABCG2	ABCG2	chr4:89011415-89152474	IPF	CTRL	OK	2.16948	2.49162	-0.199734	-1.14849	0.642053	0.1361	0.281779	no	IPF vs CONTROL DOWN	unique	2.94522	2.49222	3.36709	1.87018	0.977007	1.36516	1.50357	1.99087	3.30512	2.00302	3.65551
ABCG4	ABCG4	ABCG4	chr11:119019749-119033374	IPF	CTRL	NOTEST	0.246838	0.0165935	3.89487	14.8756	0	1	1	no	IPF vs CONTROL UP	unique	0.239086	0.362961	0.242698	0.222515	0.136819	0.276948	0.0409313	0	0	0.0420362	0
ABCG5	ABCG5	ABCG5	chr2:44039610-44065958	IPF	CTRL	NOTEST	0.653861	0.141069	2.21259	4.63505	0	1	1	no	IPF vs CONTROL UP	unique	0.742886	0.362502	0.323331	1.33293	0.546862	0.614653	0.190852	0	0.204338	0.168016	0.142137
ABCG8	ABCG8	ABCG8	chr2:44066102-44105605	IPF	CTRL	NOTEST	0.0596695	0.0763096	-0.354871	-1.27887	0	1	1	no	IPF vs CONTROL DOWN	unique	0.109246	0.248771	0	0	0	0	0	0.113553	0.210341	0.057654	0
ABHD1	ABHD1	ABHD1	chr2:27346656-27357542	IPF	CTRL	NOTEST	0.990264	0.930609	0.0896394	1.0641	0	1	1	no	IPF vs CONTROL UP	unique	1.88249	0.952641	0.76608	0.291458	1.07985	0.969068	0.645821	1.73867	0.402556	0.884398	0.981598
ABHD10	ABHD10	ABHD10	chr3:111697722-111712215	IPF	CTRL	OK	9.8423	5.54043	0.828996	1.77645	-0.896373	0.03555	0.104188	no	IPF vs CONTROL UP	unique	9.64535	8.12258	9.05786	10.7835	10.8414	10.6031	6.66503	6.72347	4.57341	4.85949	4.88077
ABHD11	ABHD11	ABHD11	chr7:73150424-73153190	IPF	CTRL	OK	9.44767	7.48119	0.336689	1.26286	-0.140807	0.74175	0.855411	no	IPF vs CONTROL UP	unique	7.63839	14.358	4.99453	7.32207	14.202	8.171	9.03907	4.55999	9.46065	4.79791	9.54835
ABHD12	ABHD12	ABHD12	chr20:25228705-25371618	IPF	CTRL	OK	14.5425	16.2477	-0.159959	-1.11726	0.192703	0.6663	0.805569	no	IPF vs CONTROL DOWN	unique	16.8665	14.613	15.503	13.2104	14.9011	12.1611	21.4636	13.8019	17.4541	16.7126	11.8063
ABHD12B	ABHD12B	ABHD12B	chr14:51338877-51371688	IPF	CTRL	NOTEST	1.13817	0.586334	0.956921	1.94116	0	1	1	no	IPF vs CONTROL UP	unique	0.204399	1.39646	0.249528	0.569689	2.98839	1.42055	0.631093	0.849576	0.196696	0.432111	0.822194
ABHD13	ABHD13	ABHD13	chr13:108870762-108886603	IPF	CTRL	OK	10.7052	7.78204	0.460091	1.37563	-0.4551	0.28205	0.470084	no	IPF vs CONTROL UP	unique	11.4973	10.5824	11.382	10.5047	9.3115	10.9533	8.09575	7.87554	7.91525	7.90414	7.11952
ABHD14A	ABHD14A	ABHD14A	chr3:52009041-52023218	IPF	CTRL	OK	7.82914	7.45721	0.0702184	1.04988	0.303206	0.4753	0.656724	no	IPF vs CONTROL UP	unique	6.8028	9.25357	9.07755	4.68099	9.69494	7.46502	7.8069	5.53097	5.39173	11.6923	6.86416
ABHD14A-ACY1	ABHD14A-ACY1	ABHD14A-ACY1	chr3:52009041-52023218	IPF	CTRL	NOTEST	0.497976	0.520152	-0.0628566	-1.04453	0	1	1	no	IPF vs CONTROL DOWN	unique	1.03987	2.92731e-17	2.67339e-05	1.26303e-53	1.94788	7.7441e-05	2.33979	7.14554e-08	3.75119e-12	0.0431556	0.217812
ABHD14B	ABHD14B	ABHD14B	chr3:52002525-52008646	IPF	CTRL	OK	14.6811	17.5708	-0.259218	-1.19683	0.814283	0.06195	0.158527	no	IPF vs CONTROL DOWN	unique	14.4267	11.3688	17.9792	8.63709	20.8176	14.8572	16.5159	19.7645	15.7696	18.3099	17.494
ABHD15	ABHD15	ABHD15	chr17:27887688-27894042	IPF	CTRL	OK	9.95416	7.52919	0.402805	1.32208	-0.288611	0.49145	0.669934	no	IPF vs CONTROL UP	unique	10.1472	9.30143	7.01893	14.285	10.7047	8.26769	8.34836	8.49212	6.29231	8.75582	5.75734
ABHD16A	ABHD16A	ABHD16A	chr6_ssto_hap7:2985531-3001955	IPF	CTRL	OK	1.89982	2.43329	-0.357047	-1.2808	0.750825	0.0835	0.198921	no	IPF vs CONTROL DOWN	multiple	1.71376	1.63069	2.19997	1.88993	2.23877	1.72579	2.76223	2.73019	1.85403	2.69957	2.12043
ABHD16B	ABHD16B	ABHD16B	chr20:62492565-62494341	IPF	CTRL	OK	7.2514	7.10668	0.0290836	1.02036	0.434319	0.31325	0.505855	no	IPF vs CONTROL UP	unique	10.8975	8.20834	3.68159	6.77892	8.50467	5.43736	6.20795	8.01443	5.16352	8.05852	8.08897
ABHD2	ABHD2	ABHD2	chr15:89631380-89745591	IPF	CTRL	OK	55.9597	57.2156	-0.0320202	-1.02244	0.440938	0.30565	0.497239	no	IPF vs CONTROL DOWN	unique	61.9519	34.4801	63.5854	41.6476	72.5523	61.5407	66.4987	54.4968	52.0405	56.5462	56.4956
ABHD3	ABHD3	ABHD3	chr18:19230857-19284766	IPF	CTRL	OK	11.1338	6.32013	0.816925	1.76165	-1.00304	0.0167	0.0586028	no	IPF vs CONTROL UP	unique	5.859	13.0167	7.75464	16.1447	12.7723	11.2557	9.58723	6.23776	4.67677	6.79084	4.30806
ABHD4	ABHD4	ABHD4	chr14:23067146-23081265	IPF	CTRL	OK	10.6687	10.7865	-0.0158521	-1.01105	0.437802	0.2995	0.490341	no	IPF vs CONTROL DOWN	unique	12.1014	11.5262	14.4665	7.14379	8.39584	10.3783	10.4643	13.6666	8.17712	10.8704	10.7543
ABHD5	ABHD5	ABHD5	chr3:43732374-43764217	IPF	CTRL	OK	6.79998	11.5107	-0.759375	-1.69276	1.89922	5e-05	0.000459061	yes	IPF vs CONTROL DOWN	unique	7.39518	5.93633	6.51005	7.9505	5.79722	7.21061	19.4345	6.96923	13.4736	9.2018	8.47447
ABHD6	ABHD6	ABHD6	chr3:58223258-58280461	IPF	CTRL	OK	5.04342	4.14475	0.283118	1.21682	-0.10887	0.7916	0.888424	no	IPF vs CONTROL UP	unique	5.13575	4.1768	4.84445	3.58271	7.56343	4.9574	4.80757	3.05027	3.41365	5.35725	4.09502
ABHD8	ABHD8	ABHD8	chr19:17402939-17414282	IPF	CTRL	OK	5.3953	5.98601	-0.149892	-1.10949	0.721513	0.0813	0.195092	no	IPF vs CONTROL DOWN	unique	6.91012	5.94102	3.3533	4.91754	5.69597	5.55384	7.14096	5.42293	4.6153	7.74377	5.00709
ABI1	ABI1	ABI1	chr10:26986594-27150016	IPF	CTRL	OK	20.256	15.3323	0.40178	1.32114	-0.186031	0.65175	0.795909	no	IPF vs CONTROL UP	unique	17.3326	19.221	17.0012	23.9062	24.4746	19.6005	19.5806	13.1123	15.9601	13.5287	14.4796
ABI2	ABI2	ABI2	chr2:204193002-204296892	IPF	CTRL	OK	26.3206	23.1564	0.184786	1.13665	0.099132	0.80905	0.899083	no	IPF vs CONTROL UP	unique	25.0889	21.586	24.4655	22.1397	29.7481	34.8956	18.2173	25.811	23.7802	21.1921	26.7812
ABI3	ABI3	ABI3	chr17:47283595-47300587	IPF	CTRL	OK	8.70679	9.10851	-0.0650736	-1.04614	0.376505	0.38605	0.577322	no	IPF vs CONTROL DOWN	unique	9.10224	12.087	6.47227	6.42952	11.4032	6.74654	8.72436	9.5289	8.87389	11.2098	7.20561
ABI3BP	ABI3BP	ABI3BP	chr3:100468178-100712334	IPF	CTRL	OK	30.445	47.083	-0.629003	-1.5465	1.71762	5e-05	0.000459061	yes	IPF vs CONTROL DOWN	unique	14.3229	45.8651	33.716	33.6614	27.1067	27.9978	38.333	46.6641	56.0269	43.9738	50.4174
ABL1	ABL1	ABL1	chr9:133589267-133763062	IPF	CTRL	OK	33.4229	33.6077	-0.0079526	-1.00553	0.441045	0.29925	0.490038	no	IPF vs CONTROL DOWN	unique	36.0734	41.6144	30.4277	31.2731	29.6434	31.5056	23.0935	29.2126	45.7998	39.0856	30.8469
ABL2	ABL2	ABL2	chr1:179068461-179198819	IPF	CTRL	OK	12.5624	12.7628	-0.0228376	-1.01596	0.446656	0.24025	0.421488	no	IPF vs CONTROL DOWN	unique	12.2324	13.0114	10.7627	13.7719	11.5466	14.0491	15.2568	8.79486	18.7549	10.5628	10.4446
ABLIM1	ABLIM1	ABLIM1	chr10:116190868-116444414	IPF	CTRL	OK	43.5219	54.9299	-0.335852	-1.26212	1.05377	0.01515	0.0542956	no	IPF vs CONTROL DOWN	unique	35.7482	36.435	52.5728	41.1842	38.4644	56.7266	48.2855	52.0202	57.6854	59.174	57.4845
ABLIM2	ABLIM2	ABLIM2	chr4:7967036-8160559	IPF	CTRL	OK	4.97722	3.97078	0.325919	1.25346	-0.10999	0.79375	0.889519	no	IPF vs CONTROL UP	unique	7.0207	5.16963	3.45645	5.16117	4.5558	4.49959	2.22622	4.59141	4.95573	3.52773	4.5528
ABLIM3	ABLIM3	ABLIM3	chr5:148521053-148639999	IPF	CTRL	OK	10.0218	14.146	-0.49725	-1.41152	1.30901	0.00165	0.00909602	yes	IPF vs CONTROL DOWN	unique	10.2349	12.6305	12.8663	8.66712	5.1001	10.632	11.4947	13.1799	12.4617	15.4278	18.1659
ABO	ABO	ABO	chr9:136130562-136150630	IPF	CTRL	OK	7.9187	5.52797	0.518515	1.43248	-0.447081	0.28585	0.474558	no	IPF vs CONTROL UP	unique	11.221	3.46478	4.17803	5.30171	11.4512	11.8955	5.91948	6.52168	4.20967	5.12502	5.86398
ABP1	ABP1	ABP1	chr7:150549564-150558379	IPF	CTRL	NOTEST	1.15259	0.475616	1.27701	2.42336	0	1	1	no	IPF vs CONTROL UP	unique	1.68018	0.819839	0.950886	0.669742	1.03094	1.76395	0.33922	0	0.808691	0.50676	0.723407
ABR	ABR	ABR	chr17:906757-1090616	IPF	CTRL	OK	37.1766	39.1971	-0.0763527	-1.05435	0.513722	0.2374	0.417931	no	IPF vs CONTROL DOWN	unique	40.2466	34.5105	34.1441	42.7273	39.1204	32.3106	37.9794	41.9983	35.4274	42.2505	38.3299
ABRA	ABRA	ABRA	chr8:107771710-107782472	IPF	CTRL	NOTEST	1.03638	0.3845	1.4305	2.69541	0	1	1	no	IPF vs CONTROL UP	unique	1.1612	0.961547	1.4151	0.736595	1.08791	0.855952	0.461037	0.438908	0.304883	0.222832	0.49484
ABRACL	ABRACL	ABRACL	chr6:139349818-139364439	IPF	CTRL	OK	8.9803	8.01807	0.163509	1.12001	0.00382963	0.9927	0.996565	no	IPF vs CONTROL UP	unique	9.52378	5.63918	12.1285	8.472	12.8241	5.29422	19.0644	3.95584	6.96008	5.24829	4.86172
ABT1	ABT1	ABT1	chr6:26597170-26600277	IPF	CTRL	OK	9.46268	8.83564	0.0989154	1.07097	0.215729	0.6123	0.768239	no	IPF vs CONTROL UP	unique	7.91013	10.3352	8.93232	9.22602	8.35613	12.0163	7.96488	10.5126	6.49096	10.6106	8.59914
ABTB1	ABTB1	ABTB1	chr3:127391780-127399769	IPF	CTRL	OK	22.2066	24.7405	-0.155884	-1.1141	0.714019	0.0916	0.212699	no	IPF vs CONTROL DOWN	unique	17.9591	32.0002	20.7059	23.6312	17.5671	21.3761	22.2314	25.3523	20.1537	34.5798	21.3851
ABTB2	ABTB2	ABTB2	chr11:34172533-34379555	IPF	CTRL	OK	3.76298	3.35785	0.164341	1.12065	0.216199	0.60975	0.766437	no	IPF vs CONTROL UP	unique	3.43387	5.36754	3.33082	4.47033	1.99762	3.97772	2.03206	3.32787	3.08232	3.86722	4.47976
ACAA1	ACAA1	ACAA1	chr3:38080695-38178733	IPF	CTRL	OK	19.9252	19.1259	0.0590669	1.04179	0.0846626	0.80555	0.896772	no	IPF vs CONTROL UP	unique	17.2066	22.836	13.1946	14.2277	32.6574	19.4288	21.7992	13.295	17.5083	23.4958	19.5311
ACAA2	ACAA2	ACAA2	chr18:47309873-47340251	IPF	CTRL	OK	7.28072	12.8916	-0.824273	-1.77064	1.5783	0.0004	0.00281058	yes	IPF vs CONTROL DOWN	unique	6.58353	6.62439	9.89704	6.61902	8.81743	5.14292	15.9413	12.0928	11.7893	14.0685	10.5659
ACACA	ACACA	ACACA	chr17:35441926-35766902	IPF	CTRL	OK	13.3782	14.0711	-0.0728588	-1.0518	0.293831	0.498	0.67552	no	IPF vs CONTROL DOWN	unique	14.4942	10.6965	15.706	15.9484	10.3401	13.0838	17.4805	15.9065	10.7616	13.3035	12.9036
ACACB	ACACB	ACACB	chr12:109577201-109706030	IPF	CTRL	OK	16.1166	14.449	0.157576	1.11541	-0.108497	0.79415	0.889628	no	IPF vs CONTROL UP	unique	11.3513	18.0311	16.4706	18.4591	15.5973	16.7901	12.333	18.4011	12.724	15.9241	12.8628
ACAD10	ACAD10	ACAD10	chr12:112123856-112194911	IPF	CTRL	OK	12.2006	7.09597	0.781883	1.71937	-1.16907	0.00675	0.0283807	yes	IPF vs CONTROL UP	unique	11.7203	14.8886	7.44087	13.77	12.6354	12.7486	7.34019	7.72643	5.436	8.51895	6.45829
ACAD11	ACAD11	ACAD11	chr3:132276981-132593050	IPF	CTRL	OK	24.1354	10.9197	1.14422	2.21027	-1.011	0.01875	0.0643361	no	IPF vs CONTROL UP	unique	22.0405	34.0769	15.0135	28.9965	20.5342	24.1509	10.6536	13.7674	12.3776	10.2217	7.57815
ACAD8	ACAD8	ACAD8	chr11:134123433-134135746	IPF	CTRL	OK	16.4218	8.59751	0.933625	1.91007	-1.39105	0.00085	0.00525792	yes	IPF vs CONTROL UP	unique	15.756	18.3957	9.84939	16.95	21.3401	16.2398	8.81959	8.88173	5.7839	11.6313	7.87101
ACAD9	ACAD9	ACAD9	chr3:128598332-128631957	IPF	CTRL	OK	9.44541	9.5781	-0.0201258	-1.01405	0.237314	0.5739	0.738094	no	IPF vs CONTROL DOWN	unique	9.69311	9.7468	8.43592	11.8002	9.65109	7.34534	11.4386	8.23925	7.82232	11.3574	9.03292
ACADL	ACADL	ACADL	chr2:211052715-211090215	IPF	CTRL	OK	3.30139	11.0715	-1.7457	-3.35358	2.64365	5e-05	0.000459061	yes	IPF vs CONTROL DOWN	unique	1.64205	1.06835	3.71707	8.34638	2.31728	2.7172	18.8058	9.63087	9.03282	5.63348	12.2544
ACADM	ACADM	ACADM	chr1:76190042-76229355	IPF	CTRL	OK	6.87327	7.29284	-0.0854846	-1.06104	0.301189	0.48485	0.664946	no	IPF vs CONTROL DOWN	unique	5.48611	5.86422	8.80185	3.59317	9.71289	7.78139	10.0686	6.63336	7.3296	5.90921	6.52345
ACADS	ACADS	ACADS	chr12:121163570-121177811	IPF	CTRL	OK	5.4374	7.94038	-0.546292	-1.46033	1.01158	0.02085	0.0696794	no	IPF vs CONTROL DOWN	unique	6.02739	5.27907	5.18379	5.81916	6.37667	3.93829	9.21808	8.5126	6.54521	8.48817	6.93784
ACADSB	ACADSB	ACADSB	chr10:124768428-124817806	IPF	CTRL	OK	8.87877	7.64051	0.216691	1.16207	0.0283972	0.9446	0.971733	no	IPF vs CONTROL UP	unique	7.84491	6.7534	10.7445	11.2912	6.44293	10.1957	9.14744	7.90732	6.31055	6.48198	8.35526
ACADVL	ACADVL	ACADVL	chr17:7093209-7128586	IPF	CTRL	OK	103.983	84.1093	0.306014	1.23629	-0.267775	0.53025	0.701919	no	IPF vs CONTROL UP	unique	112.234	129.902	74.7836	108.662	107.701	90.6173	86.2804	83.5758	84.5751	88.661	77.4544
ACAN	ACAN	ACAN	chr15:89346673-89418585	IPF	CTRL	NOTEST	1.15654	0.406708	1.50775	2.84366	0	1	1	no	IPF vs CONTROL UP	unique	1.05416	3.45519	1.32824	0.230984	0.410966	0.459685	0.114769	0.531407	0.382148	0.47068	0.534535
ACAP1	ACAP1	ACAP1	chr17:7239847-7254793	IPF	CTRL	OK	14.3446	6.47316	1.14797	2.21602	-1.66727	0.0002	0.00156984	yes	IPF vs CONTROL UP	unique	14.0853	16.8326	8.4423	22.7397	14.7989	9.16904	5.56336	9.07454	4.93073	7.49571	5.30144
ACAP2	ACAP2	ACAP2	chr3:194995464-195163817	IPF	CTRL	OK	18.0479	15.7039	0.200711	1.14926	-0.0165165	0.9684	0.984649	no	IPF vs CONTROL UP	unique	17.7768	17.3614	18.7296	17.4378	19.0436	17.9384	19.9734	15.3608	14.8742	14.4328	13.8783
ACAP3	ACAP3	ACAP3	chr1:1227763-1243269	IPF	CTRL	OK	23.4596	15.6921	0.580139	1.49499	-0.938805	0.02695	0.0849845	no	IPF vs CONTROL UP	unique	25.6919	38.1322	13.1322	27.3291	18.0491	18.4232	12.1347	17.7258	14.7244	16.7789	17.0968
ACAT1	ACAT1	ACAT1	chr11:107992257-108018891	IPF	CTRL	OK	9.12713	11.8017	-0.370762	-1.29304	0.856236	0.04695	0.128616	no	IPF vs CONTROL DOWN	unique	9.38076	7.2253	11.3542	8.65923	10.3135	7.82981	13.9703	14.0509	7.83462	13.9114	9.24133
ACAT2	ACAT2	ACAT2	chr6:160181290-160210735	IPF	CTRL	OK	2.28135	6.58832	-1.53002	-2.8879	0.697395	0.12535	0.266105	no	IPF vs CONTROL DOWN	unique	1.96342	1.53785	3.92995	2.85966	1.73279	1.66444	5.63981	6.80943	4.40092	8.1603	7.93112
ACBD3	ACBD3	ACBD3	chr1:226332379-226374423	IPF	CTRL	OK	21.2527	18.7847	0.178091	1.13139	0.032503	0.9395	0.969128	no	IPF vs CONTROL UP	unique	19.0597	21.2411	23.5615	17.8141	23.294	22.5458	20.9892	16.455	20.7614	16.9562	18.7615
ACBD4	ACBD4	ACBD4	chr17:43209966-43221543	IPF	CTRL	OK	12.5168	10.9664	0.190784	1.14138	0.129902	0.75805	0.866433	no	IPF vs CONTROL UP	unique	10.2102	13.4669	13.8076	15.1615	11.4512	11.0036	8.86065	13.0963	10.1018	11.2064	11.5667
ACBD5	ACBD5	ACBD5	chr10:27484142-27531068	IPF	CTRL	OK	8.05656	8.32441	-0.0471838	-1.03325	0.394991	0.3559	0.548644	no	IPF vs CONTROL DOWN	unique	7.68896	6.12816	7.891	7.16776	8.99819	10.4653	10.0373	7.50297	7.61706	9.59132	6.8734
ACBD6	ACBD6	ACBD6	chr1:180257351-180472022	IPF	CTRL	OK	14.4973	13.192	0.136125	1.09895	-0.120469	0.77765	0.878888	no	IPF vs CONTROL UP	unique	10.7592	15.2076	12.6772	11.8945	18.8265	17.6189	12.4532	12.5297	16.0674	10.487	14.4226
ACBD7	ACBD7	ACBD7	chr10:15117473-15130775	IPF	CTRL	NOTEST	1.24224	0.50678	1.29352	2.45125	0	1	1	no	IPF vs CONTROL UP	unique	1.36955	0.974588	0.364969	0.358468	2.20455	2.18134	0.70348	0.266938	0.412061	0.40642	0.745003
ACCS	ACCS	ACCS	chr11:44087728-44105569	IPF	CTRL	OK	17.3869	15.9427	0.1251	1.09058	0.0871246	0.84055	0.917134	no	IPF vs CONTROL UP	unique	12.4513	29.7409	9.98361	22.0886	14.5369	15.5199	18.0534	10.2684	6.77443	29.2957	15.3217
ACCSL	ACCSL	ACCSL	chr11:44069530-44081527	IPF	CTRL	NOTEST	0	0.0256527	#NAME?	0	0	1	1	no	IPF vs CONTROL DOWN (0)	unique	0	0	0	0	0	0	0.0419967	0	0	0.0862667	0
ACD	ACD	ACD	chr16:67679029-67694718	IPF	CTRL	OK	3.79565	4.50039	-0.245702	-1.18567	0.563467	0.17615	0.341022	no	IPF vs CONTROL DOWN	unique	3.87195	4.38863	3.56869	3.98228	3.8206	3.14176	3.77958	4.89608	3.52173	5.4271	4.87746
ACE	ACE	ACE	chr17:61554421-61575741	IPF	CTRL	OK	7.54659	44.7275	-2.56727	-5.92685	4.89554	5e-05	0.000459061	yes	IPF vs CONTROL DOWN	unique	9.9563	6.07247	6.84592	11.8221	5.15066	5.43208	39.1726	46.196	25.7812	78.929	33.5587
ACE2	ACE2	ACE2	chrX:15579155-15620192	IPF	CTRL	NOTEST	0.514586	0.301199	0.772697	1.70846	0	1	1	no	IPF vs CONTROL UP	unique	0.410709	0.467623	0.650399	0.917374	0.0705141	0.570898	0.48519	0.256165	0.316347	0.17333	0.274962
ACER1	ACER1	ACER1	chr19:6306509-6333640	IPF	CTRL	NOTEST	0.107412	0.0449983	1.25522	2.38703	0	1	1	no	IPF vs CONTROL UP	unique	0	0	0	0.398053	0.246421	0	0.0736683	0	0	0.151323	0
ACER2	ACER2	ACER2	chr9:19408924-19452500	IPF	CTRL	OK	6.83781	2.60911	1.38998	2.62074	-1.8386	5e-05	0.000459061	yes	IPF vs CONTROL UP	unique	4.88576	7.06944	4.89935	8.23922	8.74095	7.19213	2.45791	2.43345	2.35182	3.00785	2.79452
ACER3	ACER3	ACER3	chr11:76571916-76734850	IPF	CTRL	OK	9.81649	11.5991	-0.240731	-1.18159	0.94195	0.02	0.0676899	no	IPF vs CONTROL DOWN	unique	11.6758	9.65468	8.49951	10.6567	8.06075	10.3515	16.1612	10.6462	11.368	9.254	10.566
ACHE	ACHE	ACHE	chr7:100487614-100493541	IPF	CTRL	OK	1.80873	1.6004	0.176541	1.13017	0.212518	0.6211	0.774853	no	IPF vs CONTROL UP	unique	2.26488	1.82612	0.568644	2.42529	2.40484	1.36261	0.720573	2.07735	1.92512	2.20614	1.07284
ACIN1	ACIN1	ACIN1	chr14:23527773-23569665	IPF	CTRL	OK	48.3307	35.2617	0.454837	1.37063	-0.5507	0.2004	0.373047	no	IPF vs CONTROL UP	unique	42.3832	62.2401	35.3132	57.9591	48.227	43.8615	26.8703	39.8023	38.8604	31.8699	38.9057
ACLY	ACLY	ACLY	chr17:40023178-40075272	IPF	CTRL	OK	21.3959	22.9585	-0.101693	-1.07303	0.487751	0.25675	0.440737	no	IPF vs CONTROL DOWN	unique	18.9388	22.9834	20.6433	18.5468	26.8593	20.404	23.3071	21.205	19.3096	25.8113	25.1596
ACMSD	ACMSD	ACMSD	chr2:135596185-135676176	IPF	CTRL	NOTEST	0.278102	0.256765	0.115163	1.0831	0	1	1	no	IPF vs CONTROL UP	unique	0	0.279227	0	0.68306	0.422292	0.284031	0.315658	0.509545	0	0.12968	0.328943
ACN9	ACN9	ACN9	chr7:96745904-96811075	IPF	CTRL	NOTEST	1.34158	1.08607	0.304817	1.23526	0	1	1	no	IPF vs CONTROL UP	unique	1.14734	0.653177	1.22423	0.400068	2.46508	2.15958	2.10132	0.596211	0.828283	1.13589	0.768639
ACO1	ACO1	ACO1	chr9:32384600-32450832	IPF	CTRL	OK	10.8606	13.0627	-0.266345	-1.20276	0.664317	0.1143	0.248605	no	IPF vs CONTROL DOWN	unique	11.1191	11.3662	9.58994	13.4832	11.4261	8.17921	17.404	14.1741	13.4406	11.0034	9.29136
ACO2	ACO2	ACO2	chr22:41865128-41940479	IPF	CTRL	OK	13.1912	19.0498	-0.530202	-1.44413	0.696309	0.1023	0.229728	no	IPF vs CONTROL DOWN	unique	10.384	10.7002	16.7514	8.77649	20.4854	12.0496	18.6101	17.1819	15.2647	23.8868	20.3055
ACOT1	ACOT1	ACOT1	chr14:73945188-74025651	IPF	CTRL	OK	0.77601	2.29642	-1.56524	-2.95927	0.654762	0.1967	0.368105	no	IPF vs CONTROL DOWN	unique	0.74849	1.49142	1.25599	0.782479	0.160944	0.216739	3.22478	3.69446	1.0805	1.97734	1.50504
ACOT11	ACOT11	ACOT11	chr1:55013806-55100417	IPF	CTRL	OK	8.31937	5.3763	0.62986	1.54741	-1.05466	0.01325	0.0488856	yes	IPF vs CONTROL UP	unique	9.39033	5.8467	6.64252	8.38228	11.5644	8.08997	5.66783	5.83413	4.59916	3.85793	6.92246
ACOT12	ACOT12	ACOT12	chr5:80256507-81047072	IPF	CTRL	NOTEST	0.0151039	0.00764092	0.983106	1.97672	0	1	1	no	IPF vs CONTROL UP	unique	0	0	0.0906236	0	0	0	0.0382046	0	0	0	0
ACOT13	ACOT13	ACOT13	chr6:24667262-24719403	IPF	CTRL	OK	10.9031	8.28192	0.396704	1.3165	-0.145636	0.7441	0.856758	no	IPF vs CONTROL UP	unique	9.0131	10.4835	10.2308	14.1544	8.48161	13.0553	10.2393	8.92077	7.15342	5.86597	9.23012
ACOT2	ACOT2	ACOT2	chr14:74034323-74042362	IPF	CTRL	OK	4.76053	6.86118	-0.527333	-1.44126	1.06716	0.01685	0.0590471	no	IPF vs CONTROL DOWN	unique	4.94283	3.14479	5.90938	4.00887	4.05724	6.5001	9.85963	6.18168	4.26298	7.47346	6.52815
ACOT4	ACOT4	ACOT4	chr14:74058409-74062470	IPF	CTRL	NOTEST	0.54874	1.09463	-0.996254	-1.99481	0	1	1	no	IPF vs CONTROL DOWN	unique	0.18355	0.417984	1.00794	0.25586	0.7893	0.637803	2.31326	0.762939	0.353294	1.55159	0.492081
ACOT6	ACOT6	ACOT6	chr14:74083547-74086592	IPF	CTRL	NOTEST	0.526494	0.140532	1.90551	3.74642	0	1	1	no	IPF vs CONTROL UP	unique	0.625906	1.42539	0.382761	0	0	0.724905	0.161295	0	0	0.331318	0.210049
ACOT7	ACOT7	ACOT7	chr1:6324331-6453826	IPF	CTRL	OK	3.6685	5.02702	-0.454515	-1.37032	0.685373	0.11265	0.246218	no	IPF vs CONTROL DOWN	unique	4.28458	3.46999	5.05881	2.10267	2.95435	4.14057	7.0086	3.3342	6.23612	5.68803	2.86814
ACOT8	ACOT8	ACOT8	chr20:44462469-44486048	IPF	CTRL	OK	7.92254	8.39601	-0.0837408	-1.05976	0.159418	0.7119	0.836597	no	IPF vs CONTROL DOWN	unique	13.3093	7.1447	5.20483	7.28623	5.86357	8.72661	8.8099	7.54776	5.32984	9.86575	10.4268
ACOT9	ACOT9	ACOT9	chrX:23721776-23761407	IPF	CTRL	OK	13.0587	12.5987	0.0517332	1.03651	-0.00601693	0.98785	0.994994	no	IPF vs CONTROL UP	unique	11.068	13.6023	11.8027	16.8995	14.8051	10.1745	17.6722	10.0528	10.6404	15.969	8.65916
ACOX1	ACOX1	ACOX1	chr17:73937588-74002080	IPF	CTRL	OK	16.0627	17.4452	-0.119118	-1.08607	0.735127	0.0932	0.215391	no	IPF vs CONTROL DOWN	unique	18.0824	13.7212	17.2166	14.024	15.8424	17.4897	19.5628	17.5203	17.582	16.276	16.2851
ACOX2	ACOX2	ACOX2	chr3:58490862-58522929	IPF	CTRL	OK	4.84452	3.80189	0.349636	1.27424	-0.181366	0.67445	0.811279	no	IPF vs CONTROL UP	unique	4.06265	7.08309	3.79198	5.13647	4.58117	4.41174	4.63295	5.41013	2.9331	2.54672	3.48655
ACOX3	ACOX3	ACOX3	chr4:8368008-8442452	IPF	CTRL	OK	13.5564	9.25297	0.550984	1.46508	-0.752899	0.07875	0.190512	no	IPF vs CONTROL UP	unique	10.6631	19.5667	9.02498	11.8098	13.6914	16.5823	10.3408	8.63273	6.07962	10.3988	10.8129
ACOXL	ACOXL	ACOXL	chr2:111490149-111875799	IPF	CTRL	OK	5.67818	16.0915	-1.50279	-2.83391	2.46392	5e-05	0.000459061	yes	IPF vs CONTROL DOWN	unique	3.94759	1.12367	13.384	12.9084	0.847835	1.85761	13.3777	20.8997	13.6566	13.0235	19.4998
ACP1	ACP1	ACP1	chr2:264868-278282	IPF	CTRL	OK	27.4829	21.8259	0.332494	1.25919	-0.242029	0.586	0.747563	no	IPF vs CONTROL UP	unique	33.8687	24.3071	23.9176	28.516	22.8669	31.4214	22.2794	23.4814	22.5198	18.9725	21.8765
ACP2	ACP2	ACP2	chr11:47260852-47290584	IPF	CTRL	OK	13.9248	9.86797	0.496835	1.41111	-0.272399	0.5095	0.685777	no	IPF vs CONTROL UP	unique	18.8465	11.8265	13.2097	13.3982	14.5999	11.6682	14.4539	8.73764	8.34653	10.5638	7.23796
ACP5	ACP5	ACP5	chr19:11685474-11689801	IPF	CTRL	OK	24.0676	50.398	-1.06628	-2.09402	2.34201	5e-05	0.000459061	yes	IPF vs CONTROL DOWN	unique	30.7281	23.093	34.1031	22.8366	17.5094	16.1352	103.097	31.4976	49.8647	48.5484	18.9822
ACP6	ACP6	ACP6	chr1:147119167-147142634	IPF	CTRL	OK	8.44192	4.12337	1.03375	2.04733	-1.06418	0.01095	0.0419635	yes	IPF vs CONTROL UP	unique	7.23748	11.0499	4.61517	8.2567	8.06077	11.4315	4.56784	4.61535	4.27451	3.3014	3.85776
ACPL2	ACPL2	ACPL2	chr3:140950681-141013486	IPF	CTRL	OK	5.10596	3.62761	0.493163	1.40753	-0.43922	0.30295	0.494014	no	IPF vs CONTROL UP	unique	4.81671	5.26484	5.2226	5.78164	3.97051	5.57944	3.16741	3.30451	3.52433	3.30397	4.83782
ACPP	ACPP	ACPP	chr3:132036210-132087146	IPF	CTRL	OK	1.76587	2.79092	-0.66036	-1.58048	0.861713	0.04695	0.128616	no	IPF vs CONTROL DOWN	unique	2.30483	0.724734	2.87158	1.28471	2.09211	1.31728	3.10739	3.21742	1.70946	3.95152	1.96883
ACPT	ACPT	ACPT	chr19:51293671-51298481	IPF	CTRL	NOTEST	0.30971	0.388611	-0.327406	-1.25476	0	1	1	no	IPF vs CONTROL DOWN	unique	0.677848	0.257272	0.413897	0.314768	0.194477	0	0.232606	0.234759	0.869654	0	0.606034
ACR	ACR	ACR	chr22:51176651-51183727	IPF	CTRL	NOTEST	0.55422	0.596422	-0.105874	-1.07615	0	1	1	no	IPF vs CONTROL DOWN	unique	0.887257	0.75769	0.541724	0.309026	0.572709	0.256915	0.228335	0.921863	0.853753	0.234514	0.743644
ACRBP	ACRBP	ACRBP	chr12:6747241-6756580	IPF	CTRL	NOTEST	0.744211	0.850293	-0.192249	-1.14254	0	1	1	no	IPF vs CONTROL DOWN	unique	0.471753	1.79046	0.191807	0.877139	0.405531	0.728574	1.17246	1.4708	0.605417	0.581333	0.421455
ACRC	ACRC	ACRC	chrX:70430034-70948962	IPF	CTRL	OK	2.8214	1.21779	1.21215	2.31683	-0.120661	0.36565	0.558165	no	IPF vs CONTROL UP	unique	1.54631	2.79624	2.38263	4.82468	1.79621	3.58235	1.40177	1.32372	1.05088	0.91182	1.40074
ACRV1	ACRV1	ACRV1	chr11:125495030-125550793	IPF	CTRL	NOTEST	0.0878962	0.0168685	2.38147	5.21068	0	1	1	no	IPF vs CONTROL UP	unique	0.32722	0	0.200157	0	0	0	0.0843423	0	0	0	0
ACSBG1	ACSBG1	ACSBG1	chr15:78463186-78527049	IPF	CTRL	OK	1.70929	0.702295	1.28325	2.43387	-1.38866	0.0028	0.0140874	yes	IPF vs CONTROL UP	unique	1.07391	1.00036	1.07073	1.22628	3.85696	2.02752	0.526701	0.202587	0.842573	0.566654	1.37296
ACSBG2	ACSBG2	ACSBG2	chr19:6135709-6193112	IPF	CTRL	NOTEST	0.663274	0.178156	1.89646	3.723	0	1	1	no	IPF vs CONTROL UP	unique	0.53635	0.732815	0.392186	1.04787	0.276383	0.99404	0.137794	0.222999	0.103269	0.283048	0.14367
ACSF2	ACSF2	ACSF2	chr17:48503518-48552200	IPF	CTRL	OK	6.59142	9.19456	-0.48019	-1.39493	0.68271	0.1133	0.247032	no	IPF vs CONTROL DOWN	unique	5.24553	4.03145	6.63515	10.4276	7.43661	5.7722	12.3015	6.54228	8.83643	9.06915	9.22342
ACSF3	ACSF3	ACSF3	chr16:89160216-89222171	IPF	CTRL	OK	12.2181	7.70753	0.664683	1.58522	-1.05324	0.01695	0.0593289	no	IPF vs CONTROL UP	unique	11.1028	13.6051	7.97331	14.9384	14.255	11.4342	7.31494	8.97667	5.13458	8.47201	8.63947
ACSL1	ACSL1	ACSL1	chr4:185676748-185747215	IPF	CTRL	OK	19.3673	33.5448	-0.792467	-1.73203	1.94315	5e-05	0.000459061	yes	IPF vs CONTROL DOWN	unique	19.935	17.4529	17.7969	21.6123	19.6387	19.7681	47.7201	34.068	34.244	28.4392	23.2529
ACSL3	ACSL3	ACSL3	chr2:223725731-223808119	IPF	CTRL	OK	10.9776	15.3962	-0.488013	-1.40251	1.41325	0.0012	0.00698379	yes	IPF vs CONTROL DOWN	unique	12.2198	8.74242	13.4496	8.17842	15.2918	7.98366	19.9235	13.7816	14.1963	13.5621	15.5177
ACSL4	ACSL4	ACSL4	chrX:108884563-108976621	IPF	CTRL	OK	22.4005	26.4691	-0.240781	-1.18163	0.863738	0.043	0.12023	no	IPF vs CONTROL DOWN	unique	27.5917	22.1717	28.8588	18.8685	16.8545	20.0576	25.0988	26.7968	35.261	20.7179	24.4711
ACSL5	ACSL5	ACSL5	chr10:114133915-114188138	IPF	CTRL	OK	20.7447	16.2358	0.353565	1.27771	-0.364076	0.39985	0.590095	no	IPF vs CONTROL UP	unique	24.2417	9.87294	29.7428	18.9273	12.1064	29.5773	22.9884	16.4482	10.2618	18.0044	13.4763
ACSL6	ACSL6	ACSL6	chr5:131285666-131347761	IPF	CTRL	NOTEST	0.518861	0.207056	1.32532	2.50589	0	1	1	no	IPF vs CONTROL UP	unique	0.675866	0.502197	0.343418	0.629349	0.502491	0.459846	0.196608	0.234211	0.250865	0.142533	0.211065
ACSM1	ACSM1	ACSM1	chr16:20634558-20702578	IPF	CTRL	NOTEST	0.349383	0.368971	-0.0786971	-1.05606	0	1	1	no	IPF vs CONTROL DOWN	unique	0	0.819	0.175434	0.601956	0	0.499907	0.480735	0.149514	0.276949	0.455766	0.481889
ACSM2A	ACSM2A	ACSM2A	chr16:20462858-20498991	IPF	CTRL	NOTEST	0.0550354	0.0130957	2.07127	4.20256	0	1	1	no	IPF vs CONTROL UP	unique	0.0977876	0	0.119153	0	0	0.113272	0	0	0	0	0.0654784
ACSM2B	ACSM2B	ACSM2B	chr16:20548082-20587695	IPF	CTRL	NOTEST	0	0.023393	#NAME?	0	0	1	1	no	IPF vs CONTROL DOWN (0)	unique	0	0	0	0	0	0	0	0	0.116965	0	0
ACSM3	ACSM3	ACSM3	chr16:20775311-20860990	IPF	CTRL	OK	1.37422	2.07148	-0.592046	-1.50738	0.494611	0.28565	0.47433	no	IPF vs CONTROL DOWN	unique	1.14895	1.45678	1.3217	1.0676	2.1413	1.109	2.82014	2.18845	2.21143	2.24093	0.896441
ACSM4	ACSM4	ACSM4	chr12:7456927-7480969	IPF	CTRL	NOTEST	0.0458985	0.0175944	1.38333	2.6087	0	1	1	no	IPF vs CONTROL UP	unique	0.171048	0	0.104343	0	0	0	0.0879719	0	0	0	0
ACSM5	ACSM5	ACSM5	chr16:20420855-20452281	IPF	CTRL	NOTEST	0.61895	1.0134	-0.711313	-1.63729	0	1	1	no	IPF vs CONTROL DOWN	unique	0.362703	0.825939	0.221063	1.01211	0.311581	0.980301	1.02521	1.38228	1.28024	0.893425	0.485854
ACSS1	ACSS1	ACSS1	chr20:24986865-25038818	IPF	CTRL	OK	21.3672	19.8785	0.104193	1.07489	0.0147151	0.9727	0.987233	no	IPF vs CONTROL UP	unique	18.1524	20.5065	20.465	22.5279	24.0204	22.5312	15.8352	20.8227	16.9974	23.281	22.4561
ACSS2	ACSS2	ACSS2	chr20:33462765-33515769	IPF	CTRL	OK	19.6577	24.7944	-0.33492	-1.26131	0.937022	0.0295	0.0909248	no	IPF vs CONTROL DOWN	unique	26.4393	11.5205	18.4906	25.6844	16.2051	19.6064	22.764	29.728	19.8542	29.1542	22.4717
ACSS3	ACSS3	ACSS3	chr12:81471808-81649582	IPF	CTRL	OK	5.03902	10.8125	-1.10148	-2.14575	1.83295	5e-05	0.000459061	yes	IPF vs CONTROL DOWN	unique	5.25122	6.19635	6.51462	5.86351	2.86935	3.53905	10.9625	14.1921	11.4901	9.87393	7.54366
ACTA1	ACTA1	ACTA1	chr1:229566992-229569843	IPF	CTRL	NOTEST	0.177672	0.175009	0.0217856	1.01522	0	1	1	no	IPF vs CONTROL UP	unique	0.202187	0	0	0.281763	0.347897	0.234185	0.312105	0	0	0.427402	0.135539
ACTA2	ACTA2	ACTA2	chr10:90694830-90775542	IPF	CTRL	OK	273.804	212.946	0.362655	1.28579	-0.283459	0.52385	0.696795	no	IPF vs CONTROL UP	unique	301.311	351.676	362.952	134.199	152.527	340.158	145.256	193.481	214.275	208.689	303.029
ACTB	ACTB	ACTB	chr7:5566778-5570232	IPF	CTRL	OK	1567.9	1638.09	-0.0631831	-1.04477	0.319659	0.44665	0.632613	no	IPF vs CONTROL DOWN	unique	1861.72	1330.16	1652.23	1239.49	1452.31	1871.5	1647.46	1584.97	1610.07	1708	1639.97
ACTBL2	ACTBL2	ACTBL2	chr5:56775842-56778636	IPF	CTRL	NOTEST	0.309776	0.0973917	1.66936	3.18073	0	1	1	no	IPF vs CONTROL UP	unique	0.207978	0.2368	0.253445	0.290249	0.267913	0.602273	0.0534291	0	0.100112	0.0548754	0.278542
ACTC1	ACTC1	ACTC1	chr15:35080296-35087927	IPF	CTRL	NOTEST	0.112018	0.117524	-0.0692283	-1.04916	0	1	1	no	IPF vs CONTROL DOWN	unique	0.155747	0.35466	0.0948553	0	0.066845	0	0	0.161906	0.0749788	0.246471	0.104265
ACTG1	ACTG1	ACTG1	chr17:79476996-79479892	IPF	CTRL	OK	476.364	625.073	-0.39196	-1.31218	0.93881	0.02955	0.0910049	no	IPF vs CONTROL DOWN	unique	545.639	421.009	539.651	346.939	547.82	457.124	609.414	626.643	665.97	680.76	542.576
ACTG1P4	ACTG1P4	ACTG1P4	chr1:104068577-104122149	IPF	CTRL	OK	3.21108	1.19861	1.4217	2.679	-0.551079	0.3395	0.5323	no	IPF vs CONTROL UP	unique	2.2364	3.39515	2.00013	5.40627	2.94734	3.28121	1.1115	1.23959	1.43507	0.708567	1.49833
ACTG2	ACTG2	ACTG2	chr2:74120092-74146780	IPF	CTRL	OK	82.6	30.1062	1.45608	2.74362	-2.48492	5e-05	0.000459061	yes	IPF vs CONTROL UP	unique	87.4467	72.2009	129.302	27.1075	45.911	133.632	19.2662	18.0762	24.8902	35.3394	52.9589
ACTL10	ACTL10	ACTL10	chr20:32244892-32262264	IPF	CTRL	OK	4.80509	2.28582	1.07185	2.10213	-0.625004	0.1418	0.290366	no	IPF vs CONTROL UP	unique	6.40592	3.31535	4.52743	5.88866	3.12814	5.56502	1.49699	3.48011	1.96191	1.07626	3.41381
ACTL6A	ACTL6A	ACTL6A	chr3:179280707-179306193	IPF	CTRL	OK	5.39679	5.33593	0.0163623	1.01141	-0.022608	0.95775	0.979135	no	IPF vs CONTROL UP	unique	5.1128	3.96507	7.54278	2.45067	8.26463	5.0448	9.71834	3.15484	2.51406	6.58192	4.71049
ACTL6B	ACTL6B	ACTL6B	chr7:100240725-100254084	IPF	CTRL	NOTEST	0	0.0263606	#NAME?	0	0	1	1	no	IPF vs CONTROL DOWN (0)	unique	0	0	0	0	0	0	0	0	0	0	0.131803
ACTL7A	ACTL7A	ACTL7A	chr9:111624602-111626035	IPF	CTRL	NOTEST	0.494576	0.160942	1.61965	3.073	0	1	1	no	IPF vs CONTROL UP	unique	0.211226	0.240506	0.515769	0.29432	0.72702	0.978612	0.1087	0.219473	0	0.334926	0.141613
ACTL7B	ACTL7B	ACTL7B	chr9:111616868-111618275	IPF	CTRL	NOTEST	0.19019	0.0688754	1.46538	2.76137	0	1	1	no	IPF vs CONTROL UP	unique	0.215471	0.49068	0	0	0.185422	0.249569	0.0554459	0	0	0	0.288931
ACTL8	ACTL8	ACTL8	chr1:18081807-18153558	IPF	CTRL	NOTEST	0	0	0	1	0	1	1	no	IPF vs. CONTROL EQUAL(0)	unique	0	0	0	0	0	0	0	0	0	0	0
ACTL9	ACTL9	ACTL9	chr19:8807750-8809172	IPF	CTRL	NOTEST	0	0.0109617	#NAME?	0	0	1	1	no	IPF vs CONTROL DOWN (0)	unique	0	0	0	0	0	0	0.0548085	0	0	0	0
ACTN1	ACTN1	ACTN1	chr14:69340839-69446083	IPF	CTRL	OK	52.0129	51.3843	0.0175405	1.01223	0.300228	0.4821	0.662614	no	IPF vs CONTROL UP	unique	60.7898	75.2831	55.8996	24.6766	41.7455	53.6825	41.1834	44.571	59.5979	48.023	63.5462
ACTN1-AS1	ACTN1-AS1	ACTN1-AS1	chr14:69446398-69454180	IPF	CTRL	NOTEST	0.0587573	0.401429	-2.7723	-6.83197	0	1	1	no	IPF vs CONTROL DOWN	unique	0	0	0.352544	0	0	0	0.296925	0	0.551378	0	1.15884
ACTN2	ACTN2	ACTN2	chr1:236849769-236927558	IPF	CTRL	OK	2.3904	2.89589	-0.276753	-1.21147	0.83402	0.0503	0.135105	no	IPF vs CONTROL DOWN	unique	1.13661	3.59474	2.15306	2.55711	1.46306	3.43784	2.17241	3.80742	2.85766	3.06376	2.5782
ACTN3	ACTN3	ACTN3	chr11:66313865-66330799	IPF	CTRL	NOTEST	0.0755756	0.0554811	0.445924	1.36219	0	1	1	no	IPF vs CONTROL UP	unique	0.0986688	0	0.240492	0	0	0.114293	0.0722607	0.205145	0	0	0
ACTN4	ACTN4	ACTN4	chr19:39138266-39235114	IPF	CTRL	OK	71.3543	129.091	-0.855316	-1.80915	2.06944	5e-05	0.000459061	yes	IPF vs CONTROL DOWN	unique	77.8816	67.0237	80.8509	59.2717	72.5149	70.5833	92.7152	137.251	126.839	130.639	158.011
ACTR10	ACTR10	ACTR10	chr14:58666832-58702353	IPF	CTRL	OK	8.64488	10.0159	-0.212373	-1.15859	0.781656	0.07005	0.174222	no	IPF vs CONTROL DOWN	unique	8.14357	9.40853	9.4157	8.18758	9.36178	7.35213	12.3092	8.46429	8.30058	10.1771	10.8283
ACTR1A	ACTR1A	ACTR1A	chr10:104238985-104262512	IPF	CTRL	OK	26.9446	37.2336	-0.466612	-1.38186	1.27966	0.0025	0.0128077	yes	IPF vs CONTROL DOWN	unique	28.4854	24.2672	30.4029	21.7103	28.018	28.7836	33.0586	36.1191	37.8292	43.921	35.2403
ACTR1B	ACTR1B	ACTR1B	chr2:98272401-98280561	IPF	CTRL	OK	25.8812	27.6738	-0.0966153	-1.06926	0.519686	0.2187	0.395498	no	IPF vs CONTROL DOWN	unique	28.5948	25.0104	24.4826	26.6545	30.8224	19.7226	25.2198	31.2059	21.7704	32.6611	27.5118
ACTR2	ACTR2	ACTR2	chr2:65454828-65498390	IPF	CTRL	OK	56.139	59.0998	-0.0741486	-1.05274	0.712024	0.08785	0.20646	no	IPF vs CONTROL DOWN	unique	61.0416	43.7501	59.9944	48.5403	58.9884	64.5195	70.3091	65.2063	56.1661	55.3609	48.4566
ACTR3	ACTR3	ACTR3	chr2:114647536-114716167	IPF	CTRL	OK	35.1065	35.2597	-0.00628503	-1.00437	0.556384	0.18845	0.357032	no	IPF vs CONTROL DOWN	unique	38.0808	31.5111	38.4996	29.1908	39.0621	34.2944	41.7241	34.5649	38.8293	33.7394	27.441
ACTR3B	ACTR3B	ACTR3B	chr7:152456833-152552464	IPF	CTRL	OK	1.68069	1.8446	-0.134257	-1.09753	0.422267	0.3174	0.510434	no	IPF vs CONTROL DOWN	unique	0.140842	0.837993	1.52591	3.08033	1.77121	2.72785	1.43785	2.60075	1.17937	1.24367	2.76137
ACTR3BP2	ACTR3BP2	ACTR3BP2	chr2:92129158-92130496	IPF	CTRL	NOTEST	0	0	0	1	0	1	1	no	IPF vs. CONTROL EQUAL(0)	unique	0	0	0	0	0	0	0	0	0	0	0
ACTR3BP5	ACTR3BP5	ACTR3BP5	chr10:38989726-38991371	IPF	CTRL	NOTEST	0	0.0471849	#NAME?	0	0	1	1	no	IPF vs CONTROL DOWN (0)	unique	0	0	0	0	0	0	0.0468077	0.189117	0	0	0
ACTR3C	ACTR3C	ACTR3C	chr7:149944300-150035245	IPF	CTRL	OK	3.62113	2.64268	0.454439	1.37025	-0.310125	0.47245	0.654158	no	IPF vs CONTROL UP	unique	3.69831	2.58345	3.93648	4.9882	1.51961	5.00072	2.72565	4.9603	0.97092	1.51474	3.04178
ACTR5	ACTR5	ACTR5	chr20:37377096-37401089	IPF	CTRL	OK	4.32929	3.37997	0.357119	1.28087	-0.406172	0.34055	0.533174	no	IPF vs CONTROL UP	unique	3.65288	5.90327	3.08805	5.42566	3.94761	3.95825	3.17917	4.04172	3.40305	2.48779	3.78812
ACTR6	ACTR6	ACTR6	chr12:100593864-100618202	IPF	CTRL	OK	5.89747	4.15633	0.504788	1.41892	-0.449772	0.28965	0.478611	no	IPF vs CONTROL UP	unique	3.99565	4.95493	5.74148	6.03485	9.16421	5.49372	5.52173	5.27877	3.16402	3.69547	3.12164
ACTR8	ACTR8	ACTR8	chr3:53901093-53916229	IPF	CTRL	OK	7.32597	5.33271	0.45815	1.37378	-0.368276	0.39385	0.583914	no	IPF vs CONTROL UP	unique	7.53482	7.6759	5.55519	5.97934	7.01255	10.198	6.06971	6.43107	4.27643	4.89517	4.99118
ACTRT1	ACTRT1	ACTRT1	chrX:127184940-127186382	IPF	CTRL	NOTEST	0	0	0	1	0	1	1	no	IPF vs. CONTROL EQUAL(0)	unique	0	0	0	0	0	0	0	0	0	0	0
ACTRT2	ACTRT2	ACTRT2	chr1:2938045-2939467	IPF	CTRL	NOTEST	0	0	0	1	0	1	1	no	IPF vs. CONTROL EQUAL(0)	unique	0	0	0	0	0	0	0	0	0	0	0
ACTRT3	ACTRT3	ACTRT3	chr3:169484710-169487683	IPF	CTRL	NOTEST	0.68359	1.0038	-0.554272	-1.46843	0	1	1	no	IPF vs CONTROL DOWN	unique	0.29503	0.839803	0.449752	1.02869	0.633926	0.854338	1.441	0.766548	1.2779	0.545263	0.988298
ACVR1	ACVR1	ACVR1	chr2:158592957-158732374	IPF	CTRL	OK	14.0496	13.2696	0.0824043	1.05878	0.0201241	0.96265	0.981504	no	IPF vs CONTROL UP	unique	13.5778	13.2695	16.6089	9.55568	16.3612	14.9244	14.6859	12.5659	12.1943	13.3318	13.57
ACVR1B	ACVR1B	ACVR1B	chr12:52345450-52390863	IPF	CTRL	OK	12.9457	11.6591	0.151016	1.11035	0.132782	0.75475	0.863435	no	IPF vs CONTROL UP	unique	14.4002	10.3089	10.1145	12.0245	15.5548	15.2714	9.97314	10.4001	14.9588	13.0041	9.95946
ACVR1C	ACVR1C	ACVR1C	chr2:158383278-158485399	IPF	CTRL	NOTEST	0.336656	0.242569	0.47288	1.38788	0	1	1	no	IPF vs CONTROL UP	unique	0.268949	0.267936	0.245513	0.422694	0.230673	0.584169	0.326559	0.139808	0.226623	0.135932	0.383922
ACVR2A	ACVR2A	ACVR2A	chr2:148602569-149271044	IPF	CTRL	OK	9.55587	6.25459	0.611472	1.52782	-0.4221	0.32095	0.514015	no	IPF vs CONTROL UP	unique	9.56263	9.55894	10.6283	9.22723	9.01462	9.3435	7.0687	6.08405	5.73528	5.65998	6.72494
ACVR2B	ACVR2B	ACVR2B	chr3:38492517-38534633	IPF	CTRL	OK	6.14334	4.40831	0.478797	1.39358	-0.533573	0.2101	0.385374	no	IPF vs CONTROL UP	unique	5.89242	4.8766	5.70947	5.39634	6.00841	8.97682	3.94511	5.19987	2.74195	5.10242	5.05222
ACVR2B-AS1	ACVR2B-AS1	ACVR2B-AS1	chr3:38492517-38534633	IPF	CTRL	NOTEST	1.43678	1.11873	0.360976	1.28429	0	1	1	no	IPF vs CONTROL UP	unique	1.27569	1.45249	1.34287	0.970916	1.29502	2.28368	0.744958	1.08487	0.781499	1.04057	1.94175
ACVRL1	ACVRL1	ACVRL1	chr12:52301201-52317145	IPF	CTRL	OK	11.9359	56.5006	-2.24295	-4.73366	4.88392	5e-05	0.000459061	yes	IPF vs CONTROL DOWN	unique	13.6593	11.9412	12.2115	14.0441	9.78235	9.97716	40.2188	71.2586	44.1488	67.6468	59.23
ACY1	ACY1	ACY1	chr3:52009041-52023218	IPF	CTRL	OK	2.12139	3.49557	-0.72052	-1.64778	0.451332	0.266	0.45204	no	IPF vs CONTROL DOWN	unique	2.16937	2.74302	1.74987	2.87992	1.98927	1.19687	2.47129	2.79183	2.15536	5.70559	4.35378
ACY3	ACY3	ACY3	chr11:67410025-67418130	IPF	CTRL	NOTEST	0.390194	0.0684367	2.51135	5.70153	0	1	1	no	IPF vs CONTROL UP	unique	0.469795	0	0.143452	0.981572	0.202212	0.544133	0.0604625	0	0	0.124197	0.157524
ACYP1	ACYP1	ACYP1	chr14:75519927-75530736	IPF	CTRL	OK	3.5337	3.47255	0.0251838	1.01761	0.0394283	0.9248	0.962476	no	IPF vs CONTROL UP	unique	1.69368	3.21449	1.38708	2.34783	9.29041	3.26873	4.99075	3.51518	3.79723	2.39975	2.65986
ACYP2	ACYP2	ACYP2	chr2:54342409-54532435	IPF	CTRL	OK	2.74348	2.77446	-0.0162001	-1.01129	0.18566	0.6703	0.808662	no	IPF vs CONTROL DOWN	unique	2.76564	1.71767	2.30382	1.05037	4.54656	4.07683	3.56025	1.5672	2.66088	3.72307	2.36091
ADA	ADA	ADA	chr20:43248162-43280376	IPF	CTRL	OK	3.70912	1.83658	1.01406	2.01958	-0.756372	0.0723	0.178441	no	IPF vs CONTROL UP	unique	3.14379	4.25074	1.55888	6.5722	4.22567	2.50342	2.47679	1.42918	2.45814	1.7651	1.05368
ADAD1	ADAD1	ADAD1	chr4:123300120-123350947	IPF	CTRL	NOTEST	0.0211053	0	Inf	0	0	1	1	no	IPF vs CONTROL UP (0)	unique	0	0	0	0	0.126632	0	0	0	0	0	0
ADAD2	ADAD2	ADAD2	chr16:84224722-84230772	IPF	CTRL	NOTEST	0.315937	0.0452188	2.80464	6.98686	0	1	1	no	IPF vs CONTROL UP	unique	0	0.163198	0.0873938	0.7101	0.492751	0.442181	0.0736896	0	0	0.0671722	0.0852322
ADAL	ADAL	ADAL	chr15:43622871-43646096	IPF	CTRL	OK	3.60572	1.74194	1.04959	2.06994	-0.890553	0.0422	0.118518	no	IPF vs CONTROL UP	unique	3.56335	2.73424	2.07098	6.71491	3.2624	3.28845	1.47011	1.95989	1.42064	1.75184	2.10724
ADAM10	ADAM10	ADAM10	chr15:58888509-59042177	IPF	CTRL	OK	21.2686	29.0134	-0.447997	-1.36415	1.14897	0.0073	0.0301411	yes	IPF vs CONTROL DOWN	unique	19.078	20.8894	29.0231	16.5332	20.3272	21.7606	34.4046	25.0758	28.1519	32.0395	25.3954
ADAM11	ADAM11	ADAM11	chr17:42836567-42859214	IPF	CTRL	NOTEST	0.787121	0.602458	0.385725	1.30652	0	1	1	no	IPF vs CONTROL UP	unique	1.105	0.666063	0.435361	1.54299	0.446251	0.52706	0.367152	1.21632	0.62587	0.411373	0.391574
ADAM12	ADAM12	ADAM12	chr10:127702901-128077127	IPF	CTRL	OK	6.18374	1.59749	1.95267	3.87091	-2.58778	5e-05	0.000459061	yes	IPF vs CONTROL UP	unique	5.08615	8.57247	3.12067	3.32836	10.8709	6.12387	1.8385	0.843106	1.43293	0.822238	3.05068
ADAM15	ADAM15	ADAM15	chr1:155006281-155042029	IPF	CTRL	OK	39.012	34.0266	0.197254	1.14651	-0.0506764	0.9102	0.955128	no	IPF vs CONTROL UP	unique	48.3278	32.0293	41.0667	28.4812	45.7864	38.3805	27.3482	36.3058	25.6892	50.84	29.9498
ADAM17	ADAM17	ADAM17	chr2:9629410-9695917	IPF	CTRL	OK	15.7372	20.0627	-0.35034	-1.27486	0.943287	0.029	0.0896573	no	IPF vs CONTROL DOWN	unique	12.1565	15.9634	16.7826	21.9492	14.0531	13.5183	30.1577	17.2706	21.38	18.2125	13.2928
ADAM18	ADAM18	ADAM18	chr8:39442086-39587583	IPF	CTRL	NOTEST	0	0	0	1	0	1	1	no	IPF vs. CONTROL EQUAL(0)	unique	0	0	0	0	0	0	0	0	0	0	0
ADAM19	ADAM19	ADAM19	chr5:156904311-157002783	IPF	CTRL	OK	17.4518	10.2579	0.766647	1.70131	-1.23668	0.0035	0.0168376	yes	IPF vs CONTROL UP	unique	16.2418	21.2835	9.45956	20.9744	13.0691	23.6827	7.35993	8.42026	10.4549	12.1639	12.8904
ADAM1A	ADAM1A	ADAM1A	chr12:112336866-112339706	IPF	CTRL	OK	11.1953	6.01301	0.896732	1.86184	-1.21436	0.00545	0.023855	yes	IPF vs CONTROL UP	unique	8.8944	13.5027	7.97319	17.5496	6.9358	12.316	5.67285	7.43873	3.93695	4.8014	8.21512
ADAM2	ADAM2	ADAM2	chr8:39601254-39695779	IPF	CTRL	NOTEST	0	0	0	1	0	1	1	no	IPF vs. CONTROL EQUAL(0)	unique	0	0	0	0	0	0	0	0	0	0	0
ADAM20	ADAM20	ADAM20	chr14:70989077-71001732	IPF	CTRL	OK	4.93048	3.26499	0.59465	1.51011	-0.668685	0.11515	0.250094	no	IPF vs CONTROL UP	unique	5.72365	5.33197	3.74111	7.98779	3.66421	3.13416	2.43284	3.56965	3.60672	1.97699	4.73875
ADAM20P1	ADAM20P1	ADAM20P1	chr14:70935595-70950473	IPF	CTRL	OK	2.54137	1.49039	0.769917	1.70517	-0.850324	0.0469	0.128525	no	IPF vs CONTROL UP	unique	2.19371	4.45245	1.8013	3.195	1.06466	2.54108	1.22498	1.48716	1.65287	1.10716	1.97977
ADAM21	ADAM21	ADAM21	chr14:70918873-70926622	IPF	CTRL	NOTEST	1.96902	1.02393	0.94336	1.923	0	1	1	no	IPF vs CONTROL UP	unique	2.18577	3.73303	0.665967	3.81272	0.657053	0.759558	0.589644	1.36316	1.15733	0.69212	1.31739
ADAM21P1	ADAM21P1	ADAM21P1	chr14:70712469-70714518	IPF	CTRL	NOTEST	0.252496	0.111537	1.17873	2.26378	0	1	1	no	IPF vs CONTROL UP	unique	0	0.655877	0	0.401718	0.123765	0.333616	0.0740358	0	0.138617	0.152079	0.192955
ADAM22	ADAM22	ADAM22	chr7:87563565-87832204	IPF	CTRL	OK	3.1749	1.90328	0.73822	1.66812	-0.832775	0.0464	0.127478	no	IPF vs CONTROL UP	unique	2.20253	2.82118	3.23912	3.29387	2.88594	4.60676	1.92331	1.30402	2.41568	1.27391	2.5995
ADAM23	ADAM23	ADAM23	chr2:207308367-207482679	IPF	CTRL	OK	0.737912	0.322487	1.19421	2.28819	-1.08149	0.01375	0.0502894	no	IPF vs CONTROL UP	unique	0.854316	1.62118	0.462632	0.397474	0.652048	0.439821	0.316973	0.0986713	0.274166	0.350596	0.57203
ADAM28	ADAM28	ADAM28	chr8:24151579-24212726	IPF	CTRL	OK	8.9749	2.46371	1.86506	3.64284	-2.49944	5e-05	0.000459061	yes	IPF vs CONTROL UP	unique	9.20535	13.3831	3.91871	7.74638	13.6302	5.96567	3.98097	2.39591	1.53013	2.29908	2.11246
ADAM29	ADAM29	ADAM29	chr4:175839508-175899331	IPF	CTRL	NOTEST	0.130687	1.16251	-3.15306	-8.89539	0	1	1	no	IPF vs CONTROL DOWN	unique	0	0	0.0561251	0.514522	0	0.213476	1.06524	0.574775	1.2422	1.26426	1.66609
ADAM30	ADAM30	ADAM30	chr1:120436155-120439147	IPF	CTRL	NOTEST	0	0.0179431	#NAME?	0	0	1	1	no	IPF vs CONTROL DOWN (0)	unique	0	0	0	0	0	0	0.0248745	0	0	0	0.0648408
ADAM32	ADAM32	ADAM32	chr8:38965049-39142436	IPF	CTRL	NOTEST	0.487719	0.655071	-0.425601	-1.34313	0	1	1	no	IPF vs CONTROL DOWN	unique	0.639926	0.24287	0.779862	0.893031	0	0.370626	0.794612	0.22172	1.3348	0.281421	0.642802
ADAM33	ADAM33	ADAM33	chr20:3648619-3662738	IPF	CTRL	OK	24.9697	9.93887	1.32903	2.51233	-2.20274	5e-05	0.000459061	yes	IPF vs CONTROL UP	unique	22.9186	32.2455	17.1129	21.7514	22.5551	33.2348	4.5405	12.4228	11.5336	13.5153	7.68214
ADAM3A	ADAM3A	ADAM3A	chr8:39308563-39380508	IPF	CTRL	NOTEST	0	0	0	1	0	1	1	no	IPF vs. CONTROL EQUAL(0)	unique	0	0	0	0	0	0	0	0	0	0	0
ADAM5	ADAM5	ADAM5	chr8:39172181-39260375	IPF	CTRL	NOTEST	0	0	0	1	0	1	1	no	IPF vs. CONTROL EQUAL(0)	unique	0	0	0	0	0	0	0	0	0	0	0
ADAM6	ADAM6	ADAM6	chr14:106435818-106438358	IPF	CTRL	NOTEST	0	0	0	1	0	1	1	no	IPF vs. CONTROL EQUAL(0)	unique	0	0	0	0	0	0	0	0	0	0	0
ADAM7	ADAM7	ADAM7	chr8:24298508-24367077	IPF	CTRL	NOTEST	0	0	0	1	0	1	1	no	IPF vs. CONTROL EQUAL(0)	unique	0	0	0	0	0	0	0	0	0	0	0
ADAM8	ADAM8	ADAM8	chr10:135075919-135090407	IPF	CTRL	OK	10.3535	7.45613	0.473618	1.38859	-0.603692	0.1577	0.314714	no	IPF vs CONTROL UP	unique	12.3585	12.0843	9.2198	11.5385	9.24824	7.67159	8.66834	8.73503	6.48308	6.76955	6.62465
ADAM9	ADAM9	ADAM9	chr8:38854504-38962779	IPF	CTRL	OK	27.1894	37.2159	-0.452874	-1.36876	1.41627	0.00095	0.00574742	yes	IPF vs CONTROL DOWN	unique	30.4321	21.586	37.1485	22.9544	23.9571	27.0583	36.5911	36.8	39.7427	39.5558	33.3898
ADAMDEC1	ADAMDEC1	ADAMDEC1	chr8:24241797-24263526	IPF	CTRL	NOTEST	1.51941	0.0918572	4.04798	16.541	0	1	1	no	IPF vs CONTROL UP	unique	1.31756	1.50016	0.642548	1.10279	2.26418	2.28924	0.0677192	0	0.126809	0	0.264758
ADAMTS1	ADAMTS1	ADAMTS1	chr21:28208605-28217728	IPF	CTRL	OK	35.9643	76.4721	-1.08837	-2.12633	2.43168	5e-05	0.000459061	yes	IPF vs CONTROL DOWN	unique	46.0135	56.7262	40.7332	23.506	32.3683	16.4386	67.8045	26.6322	136.172	77.367	74.3846
ADAMTS10	ADAMTS10	ADAMTS10	chr19:8645125-8675588	IPF	CTRL	OK	10.5623	8.91708	0.244281	1.1845	-0.0386115	0.92665	0.96321	no	IPF vs CONTROL UP	unique	7.84169	18.3954	4.775	12.743	7.71614	11.9026	5.79729	10.0495	8.59195	10.5536	9.59307
ADAMTS12	ADAMTS12	ADAMTS12	chr5:33527286-33892124	IPF	CTRL	OK	4.20214	5.06194	-0.268568	-1.20461	0.805951	0.0518	0.137985	no	IPF vs CONTROL DOWN	unique	3.39769	8.19597	3.22558	4.34285	2.91542	3.13531	4.98223	5.8672	5.04612	5.40561	4.00855
ADAMTS13	ADAMTS13	ADAMTS13	chr9:136243283-136324508	IPF	CTRL	OK	2.0874	1.65768	0.332537	1.25923	-0.141866	0.74585	0.858186	no	IPF vs CONTROL UP	unique	1.75148	2.58961	0.791173	3.31206	2.25772	1.82235	1.14839	1.62325	0.848574	2.21232	2.45589
ADAMTS14	ADAMTS14	ADAMTS14	chr10:72432558-72522195	IPF	CTRL	OK	12.8079	0.566365	4.49916	22.6142	-5.41172	5e-05	0.000459061	yes	IPF vs CONTROL UP	unique	22.9363	20.0503	2.8037	6.72331	11.5298	12.8041	0.723224	0.281417	0.312784	0.42835	1.08605
ADAMTS15	ADAMTS15	ADAMTS15	chr11:130318868-130346539	IPF	CTRL	OK	8.21839	6.30077	0.383328	1.30435	-0.372295	0.3622	0.555249	no	IPF vs CONTROL UP	unique	8.46919	13.5226	5.09452	9.23901	8.34093	4.64407	4.66956	5.36633	8.25182	7.71584	5.50029
ADAMTS16	ADAMTS16	ADAMTS16	chr5:5140442-5320412	IPF	CTRL	NOTEST	0.72961	0.280703	1.37808	2.59923	0	1	1	no	IPF vs CONTROL UP	unique	0.630861	1.37126	0.174581	0.800924	0.934996	0.46504	0.382803	0.238492	0.0552238	0.151218	0.575776
ADAMTS17	ADAMTS17	ADAMTS17	chr15:100511642-100882183	IPF	CTRL	OK	3.03517	3.26888	-0.107022	-1.077	0.353713	0.40675	0.595982	no	IPF vs CONTROL DOWN	unique	2.19689	5.05363	1.85572	5.00993	1.65385	2.44098	1.96783	2.09757	4.74911	3.56944	3.96047
ADAMTS18	ADAMTS18	ADAMTS18	chr16:77316024-77469011	IPF	CTRL	NOTEST	0.474983	0.0771616	2.62192	6.1557	0	1	1	no	IPF vs CONTROL UP	unique	0.432592	1.25869	0.204809	0.0671344	0.329888	0.556787	0.0246755	0	0.0462847	0.0253436	0.289504
ADAMTS19	ADAMTS19	ADAMTS19	chr5:128796102-129074376	IPF	CTRL	NOTEST	0.526976	0.0398663	3.7245	13.2186	0	1	1	no	IPF vs CONTROL UP	unique	0.336153	0.765465	0.784494	0.391214	0.624934	0.259596	0.0862957	0	0.0539477	0.059088	0
ADAMTS2	ADAMTS2	ADAMTS2	chr5:178537851-178772431	IPF	CTRL	OK	9.8359	15.5359	-0.659481	-1.57951	1.48093	0.00095	0.00574742	yes	IPF vs CONTROL DOWN	unique	10.1402	17.3476	6.72525	12.1054	8.15764	4.53932	7.23545	15.4663	17.6281	21.2332	16.1167
ADAMTS20	ADAMTS20	ADAMTS20	chr12:43748011-43945724	IPF	CTRL	NOTEST	0.014186	0.00955338	0.570385	1.48492	0	1	1	no	IPF vs CONTROL UP	unique	0	0	0	0	0.085116	0	0	0	0.0477669	0	0
ADAMTS3	ADAMTS3	ADAMTS3	chr4:73146685-73434516	IPF	CTRL	NOTEST	1.522	0.664654	1.19529	2.28991	0	1	1	no	IPF vs CONTROL UP	unique	1.31846	1.89034	1.33764	1.70509	1.46629	1.41416	0.676867	0.304608	0.752358	0.772435	0.817004
ADAMTS4	ADAMTS4	ADAMTS4	chr1:161159537-161168845	IPF	CTRL	OK	5.45946	17.2723	-1.66163	-3.16374	2.90483	5e-05	0.000459061	yes	IPF vs CONTROL DOWN	unique	7.26864	7.07209	4.02357	6.8279	5.72751	1.83705	6.7185	0.549554	55.4812	21.2239	2.38845
ADAMTS5	ADAMTS5	ADAMTS5	chr21:28290230-28339439	IPF	CTRL	OK	3.88271	1.82813	1.0867	2.12387	-1.67224	0.0001	0.000852984	yes	IPF vs CONTROL UP	unique	4.3787	4.6198	3.51716	2.32465	3.07929	5.37663	1.59556	2.30667	1.40559	1.72339	2.10943
ADAMTS6	ADAMTS6	ADAMTS6	chr5:64444562-64777704	IPF	CTRL	OK	3.50564	0.892867	1.97316	3.92627	-2.3581	5e-05	0.000459061	yes	IPF vs CONTROL UP	unique	2.88325	5.767	1.9208	5.00733	2.20579	3.24967	0.849986	1.09375	0.412726	1.27355	0.834323
ADAMTS7	ADAMTS7	ADAMTS7	chr15:79051544-79103773	IPF	CTRL	OK	2.97121	5.74093	-0.950233	-1.93218	2.03849	5e-05	0.000459061	yes	IPF vs CONTROL DOWN	unique	3.94038	3.65994	1.6728	3.6206	1.69036	3.24318	2.78161	5.44413	6.3405	6.64336	7.49503
ADAMTS8	ADAMTS8	ADAMTS8	chr11:130274817-130298539	IPF	CTRL	OK	10.9801	30.5633	-1.47691	-2.78352	3.34828	5e-05	0.000459061	yes	IPF vs CONTROL DOWN	unique	13.5075	12.8757	16.214	10.5253	5.66251	7.09553	13.3909	26.3687	45.2917	38.6919	29.0732
ADAMTS9	ADAMTS9	ADAMTS9	chr3:64501330-64997143	IPF	CTRL	OK	12.782	9.30247	0.458431	1.37405	-0.601916	0.17215	0.335767	no	IPF vs CONTROL UP	unique	15.2963	19.7966	11.4072	12.1173	8.96848	9.10628	3.92578	4.06642	23.2325	7.12501	8.16265
ADAMTS9-AS2	ADAMTS9-AS2	ADAMTS9-AS2	chr3:64501330-64997143	IPF	CTRL	OK	14.0722	12.6748	0.150881	1.11025	0.00102526	0.9976	0.998853	no	IPF vs CONTROL UP	unique	14.1048	18.461	11.9734	19.6763	8.15497	12.0625	11.7897	11.7825	16.1152	11.4129	12.2737
ADAMTSL1	ADAMTSL1	ADAMTSL1	chr9:18474078-18910947	IPF	CTRL	OK	7.90009	1.48065	2.41564	5.33555	-2.41408	5e-05	0.000459061	yes	IPF vs CONTROL UP	unique	3.60692	9.33796	12.3659	4.62105	3.2794	14.1893	1.52089	0.71252	1.77147	1.58821	1.81017
ADAMTSL2	ADAMTSL2	ADAMTSL2	chr9:136397285-136440641	IPF	CTRL	OK	9.74155	15.1962	-0.641491	-1.55994	1.57278	0.0004	0.00281058	yes	IPF vs CONTROL DOWN	unique	8.33354	11.2454	8.3649	12.7119	8.6766	9.11697	11.2153	14.6791	15.6761	19.7409	14.6698
ADAMTSL3	ADAMTSL3	ADAMTSL3	chr15:84322837-84708593	IPF	CTRL	OK	6.5029	13.9076	-1.09672	-2.13868	2.40313	5e-05	0.000459061	yes	IPF vs CONTROL DOWN	unique	5.17258	4.52685	8.36367	8.57372	6.52282	5.85775	10.5212	12.9631	16.4674	16.0769	13.5094
ADAMTSL4	ADAMTSL4	ADAMTSL4	chr1:150521897-150533412	IPF	CTRL	OK	23.154	43.9406	-0.924291	-1.89775	2.27036	5e-05	0.000459061	yes	IPF vs CONTROL DOWN	unique	26.7075	26.1937	23.0456	27.3581	19.4132	16.2061	51.3256	26.8943	60.4243	41.4007	39.6581
ADAMTSL5	ADAMTSL5	ADAMTSL5	chr19:1505016-1513188	IPF	CTRL	NOTEST	0.984815	0.519059	0.923953	1.89731	0	1	1	no	IPF vs CONTROL UP	unique	0.609606	0.809768	1.23808	0.708985	1.48325	1.0592	0.443704	0.211219	0.684699	0.643362	0.612312
ADAP1	ADAP1	ADAP1	chr7:937536-994289	IPF	CTRL	OK	5.36725	7.30744	-0.445184	-1.36149	0.962485	0.025	0.0803916	no	IPF vs CONTROL DOWN	unique	6.81536	4.31106	5.30824	4.75414	5.31317	5.70151	7.36252	6.29655	5.34572	8.99421	8.5382
ADAP2	ADAP2	ADAP2	chr17:29248753-29286211	IPF	CTRL	OK	13.2086	7.95439	0.731655	1.66054	-0.909869	0.0319	0.0963423	no	IPF vs CONTROL UP	unique	12.0571	14.571	7.8623	16.9738	15.1689	12.6186	7.8797	9.01468	8.45109	7.98137	6.44513
ADAR	ADAR	ADAR	chr1:154554533-154600456	IPF	CTRL	OK	71.1244	71.8628	-0.0148998	-1.01038	0.448827	0.3004	0.491124	no	IPF vs CONTROL DOWN	unique	72.916	70.3894	66.9215	69.162	81.7827	65.5748	64.8821	82.1416	67.3752	75.0456	69.8693
ADARB1	ADARB1	ADARB1	chr21:46494492-46646478	IPF	CTRL	OK	30.4174	49.7881	-0.710903	-1.63683	1.56297	0.00045	0.00310007	yes	IPF vs CONTROL DOWN	unique	33.9072	34.9614	29.8148	40.6974	15.5824	27.5414	36.0652	55.7747	60.0286	48.636	48.436
ADARB2	ADARB2	ADARB2	chr10:1223252-1779670	IPF	CTRL	OK	0.342093	1.63685	-2.25846	-4.78482	2.97944	5e-05	0.000459061	yes	IPF vs CONTROL DOWN	unique	0.402422	0.114545	0.387758	0.655889	0.258863	0.233083	0.834794	1.8828	1.1626	2.5987	1.70538
ADARB2-AS1	ADARB2-AS1	ADARB2-AS1	chr10:1223252-1779670	IPF	CTRL	OK	0.565289	2.21152	-1.96798	-3.9122	0.734959	0.31325	0.505855	no	IPF vs CONTROL DOWN	unique	0	0.59808	0	2.18546	0	0.608196	0.814661	2.72553	1.00947	4.74124	1.76671
ADAT1	ADAT1	ADAT1	chr16:75632246-75657221	IPF	CTRL	OK	10.374	5.36683	0.950827	1.93298	-1.28027	0.0038	0.0179502	yes	IPF vs CONTROL UP	unique	11.8314	11.1898	9.00462	13.3816	8.36781	8.46863	7.03028	4.55988	5.84591	5.0994	4.29867
ADAT2	ADAT2	ADAT2	chr6:143743968-143771841	IPF	CTRL	OK	5.07163	2.19326	1.20937	2.31237	-1.67973	5e-05	0.000459061	yes	IPF vs CONTROL UP	unique	6.08414	5.78987	3.53753	7.86398	2.9992	4.15505	2.36578	2.12422	2.31727	1.81938	2.33964
ADAT3	ADAT3	ADAT3	chr19:1905370-1926012	IPF	CTRL	OK	4.76017	4.75136	0.00267247	1.00185	0.153416	0.7225	0.842842	no	IPF vs CONTROL UP	unique	5.15977	5.24552	2.13634	4.88056	6.65651	4.48233	3.12821	4.2128	4.25633	6.23103	5.92844
ADC	ADC	ADC	chr1:33546713-33585995	IPF	CTRL	OK	2.57652	2.06131	0.321857	1.24994	-0.356365	0.39605	0.585971	no	IPF vs CONTROL UP	unique	2.42553	3.3754	1.47869	2.06769	4.8631	1.24868	2.21653	1.68061	2.46451	1.77854	2.16638
ADCK1	ADCK1	ADCK1	chr14:78266425-78400297	IPF	CTRL	OK	3.10794	1.93275	0.685304	1.60804	-0.663488	0.1154	0.250529	no	IPF vs CONTROL UP	unique	3.15476	2.54431	2.56419	3.48406	2.48479	4.41556	2.33099	1.66652	1.89806	2.35939	1.4088
ADCK2	ADCK2	ADCK2	chr7:140372952-140394908	IPF	CTRL	OK	7.97979	8.95673	-0.166622	-1.12243	0.649585	0.1277	0.269433	no	IPF vs CONTROL DOWN	unique	8.0506	8.03817	5.8884	7.43037	9.57637	8.89481	10.7896	8.75373	7.86903	10.9836	6.38769
ADCK3	ADCK3	ADCK3	chr1:227127937-227175246	IPF	CTRL	OK	14.8354	13.7659	0.10794	1.07769	0.0860421	0.83675	0.914997	no	IPF vs CONTROL UP	unique	12.0007	17.2773	14.1396	14.9496	17.2036	13.4414	18.1397	15.0516	9.54836	12.8741	13.2158
ADCK4	ADCK4	ADCK4	chr19:41197433-41222790	IPF	CTRL	OK	22.9802	13.2501	0.794388	1.73434	-1.22778	0.00405	0.0189129	yes	IPF vs CONTROL UP	unique	18.1845	21.3672	14.0397	16.448	45.4482	22.3936	11.9865	11.6726	11.2169	16.1367	15.2378
ADCK5	ADCK5	ADCK5	chr8:145597730-145634733	IPF	CTRL	OK	4.46462	2.93959	0.602924	1.51879	-0.258423	0.52115	0.694729	no	IPF vs CONTROL UP	unique	5.58212	4.63802	1.93201	5.26009	5.7057	3.66977	2.36588	2.66547	2.61387	4.22247	2.83024
ADCY1	ADCY1	ADCY1	chr7:45614124-45762714	IPF	CTRL	NOTEST	1.29619	1.47802	-0.189388	-1.14028	0	1	1	no	IPF vs CONTROL DOWN	unique	1.37306	1.48642	1.05456	1.00642	1.37043	1.48626	1.17822	1.12338	1.71252	0.996566	2.37942
ADCY10	ADCY10	ADCY10	chr1:167778624-167883453	IPF	CTRL	NOTEST	0.19708	0.0581216	1.76163	3.39082	0	1	1	no	IPF vs CONTROL UP	unique	0.0574394	0.261616	0.255799	0.0802164	0.394327	0.133081	0.0943789	0	0.165939	0.0302903	0
ADCY10P1	ADCY10P1	ADCY10P1	chr6:41040706-41108573	IPF	CTRL	OK	2.69657	1.69737	0.667823	1.58867	-0.425593	0.33235	0.525057	no	IPF vs CONTROL UP	unique	2.00204	2.84933	2.36178	3.59805	3.17763	2.19057	3.29045	1.62603	0.670196	1.56012	1.34005
ADCY2	ADCY2	ADCY2	chr5:7396342-7830194	IPF	CTRL	NOTEST	1.07095	0.295912	1.85565	3.61914	0	1	1	no	IPF vs CONTROL UP	unique	1.08222	1.72505	1.00124	0.3628	1.15117	1.1032	0.366657	0.225031	0.208428	0.273879	0.405563
ADCY3	ADCY3	ADCY3	chr2:25013135-25142055	IPF	CTRL	OK	20.0159	17.3034	0.210095	1.15676	-0.0977273	0.8178	0.903868	no	IPF vs CONTROL UP	unique	18.6112	19.6676	18.6932	19.4371	27.23	16.4564	16.6691	19.789	14.8475	22.9177	12.2935
ADCY4	ADCY4	ADCY4	chr14:24787554-24804277	IPF	CTRL	OK	15.5639	16.2745	-0.0644129	-1.04566	0.411376	0.33395	0.526706	no	IPF vs CONTROL DOWN	unique	12.8303	25.5205	13.4626	13.705	11.2121	16.6527	11.9684	20.4082	9.30221	27.2756	12.4181
ADCY5	ADCY5	ADCY5	chr3:123001142-123167392	IPF	CTRL	OK	7.36175	5.705	0.36782	1.2904	-0.4845	0.26125	0.446237	no	IPF vs CONTROL UP	unique	6.6632	9.06892	6.70899	6.57116	4.49651	10.6617	4.37505	5.44844	4.70926	6.9014	7.09087
ADCY6	ADCY6	ADCY6	chr12:49159974-49182820	IPF	CTRL	OK	28.4838	21.243	0.423154	1.34086	-0.476966	0.2662	0.452194	no	IPF vs CONTROL UP	unique	33.2802	25.6136	23.2918	31.611	27.1835	29.9225	16.2874	23.9828	17.1562	25.0967	23.6918
ADCY7	ADCY7	ADCY7	chr16:50321822-50352043	IPF	CTRL	OK	34.0992	26.2605	0.376842	1.2985	-0.419693	0.3183	0.511122	no	IPF vs CONTROL UP	unique	33.4074	33.2951	24.8414	52.3494	29.4535	31.2485	33.4329	28.3824	22.7238	25.7382	21.0254
ADCY8	ADCY8	ADCY8	chr8:131792546-132052835	IPF	CTRL	OK	0.303817	1.88731	-2.63506	-6.212	2.71886	5e-05	0.000459061	yes	IPF vs CONTROL DOWN	unique	0	0.318373	0.383124	0.878474	0	0.242932	1.09493	3.41561	1.4135	1.0324	2.48012
ADCY9	ADCY9	ADCY9	chr16:4012649-4166186	IPF	CTRL	OK	16.1796	24.0982	-0.57475	-1.48942	1.6597	5e-05	0.000459061	yes	IPF vs CONTROL DOWN	unique	16.5129	14.0486	14.8628	18.9759	15.7967	16.8806	20.6069	23.9444	23.9761	26.7528	25.2107
ADCYAP1	ADCYAP1	ADCYAP1	chr18:904943-912173	IPF	CTRL	NOTEST	1.54804	0.200656	2.94765	7.71493	0	1	1	no	IPF vs CONTROL UP	unique	0	5.36954	0	1.39248	1.79091	0.735338	0.279522	0.18851	0.174596	0.239229	0.121421
ADCYAP1R1	ADCYAP1R1	ADCYAP1R1	chr7:31092075-31151093	IPF	CTRL	NOTEST	1.04265	1.38965	-0.41447	-1.33281	0	1	1	no	IPF vs CONTROL DOWN	unique	0.927016	1.30678	0.779216	0.92488	0.681628	1.63637	0.963115	0.367129	0.935193	2.46716	2.21566
ADD1	ADD1	ADD1	chr4:2845583-2931802	IPF	CTRL	OK	66.2009	87.1142	-0.396057	-1.31591	1.20865	0.00475	0.021416	yes	IPF vs CONTROL DOWN	unique	64.807	65.4366	72.3487	59.6892	73.5484	61.3757	70.2759	106.951	78.5267	98.8627	80.9548
ADD2	ADD2	ADD2	chr2:70889215-70995375	IPF	CTRL	OK	2.8487	2.52109	0.176255	1.12995	-0.0575334	0.8934	0.945952	no	IPF vs CONTROL UP	unique	2.82734	2.10745	2.96625	2.63429	2.17269	4.38415	1.06865	1.84213	2.21153	1.08603	6.3971
ADD3	ADD3	ADD3	chr10:111705316-111895323	IPF	CTRL	OK	28.1668	22.9308	0.296708	1.22834	-0.139283	0.74745	0.859114	no	IPF vs CONTROL UP	unique	18.0183	32.8316	29.148	23.7318	38.0782	27.1928	26.3387	23.21	19.8002	23.8614	21.4437
ADGB	ADGB	ADGB	chr6:146920135-147136597	IPF	CTRL	OK	4.80732	0.885838	2.44012	5.42686	-2.36663	0.0001	0.000852984	yes	IPF vs CONTROL UP	unique	1.02335	2.54971	1.11483	2.48232	14.3547	7.31898	0.940196	0.223981	0.363045	0.539628	2.36234
ADH1A	ADH1A	ADH1A	chr4:100010007-100222513	IPF	CTRL	OK	3.31887	3.89324	-0.230278	-1.17306	0.215387	0.5627	0.729636	no	IPF vs CONTROL DOWN	unique	2.48028	5.03549	2.6992	4.20213	3.86628	1.62984	3.28944	4.55606	3.86894	4.11334	3.63841
ADH1B	ADH1B	ADH1B	chr4:100227526-100242572	IPF	CTRL	OK	139.453	191.356	-0.456481	-1.37219	1.25827	0.00265	0.0134354	yes	IPF vs CONTROL DOWN	unique	103.422	163.226	200.239	154.168	116.228	99.4334	180.168	250.193	134.146	202.227	190.045
ADH1C	ADH1C	ADH1C	chr4:100257648-100273917	IPF	CTRL	OK	2.21623	1.55664	0.509672	1.42373	-0.340603	0.41485	0.603994	no	IPF vs CONTROL UP	unique	1.23007	1.86745	2.75299	1.71413	2.64582	3.08694	0.949438	0.639064	1.18371	1.30018	3.71082
ADH4	ADH4	ADH4	chr4:100010007-100222513	IPF	CTRL	NOTEST	1.07479	0.375477	1.51726	2.86246	0	1	1	no	IPF vs CONTROL UP	unique	2.09178	0.680485	1.00222	0	0.770524	1.90372	0.537738	0.465842	0	0.473393	0.400413
ADH5	ADH5	ADH5	chr4:99992129-100009931	IPF	CTRL	OK	20.2913	22.4752	-0.147474	-1.10763	0.674412	0.11225	0.245662	no	IPF vs CONTROL DOWN	unique	20.0556	17.44	28.1361	17.2225	14.3861	24.5076	21.0073	31.2693	20.05	20.9362	19.1134
ADH6	ADH6	ADH6	chr4:100010007-100222513	IPF	CTRL	OK	2.38514	0.749822	1.66945	3.18094	-0.758882	0.1536	0.308565	no	IPF vs CONTROL UP	unique	2.24615	2.40372	1.04469	1.01248	3.34929	4.25452	1.17487	0.450193	0.628928	0.589772	0.905349
ADH7	ADH7	ADH7	chr4:100333417-100356667	IPF	CTRL	NOTEST	0.7822	0.169068	2.20993	4.62654	0	1	1	no	IPF vs CONTROL UP	unique	0.700846	0.319182	0.943221	0	1.43106	1.29889	0.428054	0	0	0.0740012	0.343284
ADHFE1	ADHFE1	ADHFE1	chr8:67344717-67381044	IPF	CTRL	OK	9.80401	5.43393	0.851377	1.80422	-0.653662	0.122	0.261079	no	IPF vs CONTROL UP	unique	8.44866	11.4011	8.77842	12.8726	6.9936	10.3297	6.39575	5.6909	3.01181	7.35381	4.71737
ADI1	ADI1	ADI1	chr2:3501689-3523350	IPF	CTRL	OK	24.851	31.9529	-0.362642	-1.28578	1.14702	0.0058	0.0250682	yes	IPF vs CONTROL DOWN	unique	27.8276	23.5604	34.0639	22.8781	18.2547	22.5212	33.3524	33.9224	33.6488	30.6269	28.2138
ADIG	ADIG	ADIG	chr20:37209837-37217104	IPF	CTRL	NOTEST	0	0.0669234	#NAME?	0	0	1	1	no	IPF vs CONTROL DOWN (0)	unique	0	0	0	0	0	0	0.109563	0	0	0.225054	0
ADIPOQ	ADIPOQ	ADIPOQ	chr3:186560462-186576252	IPF	CTRL	NOTEST	0.182262	0	Inf	0	0	1	1	no	IPF vs CONTROL UP (0)	unique	0.249695	7.36224e-06	0.843863	0	0	6.8984e-06	0	0	0	0	0
ADIPOQ-AS1	ADIPOQ-AS1	ADIPOQ-AS1	chr3:186560462-186576252	IPF	CTRL	NOTEST	0.112881	0.0112135	3.3315	10.0666	0	1	1	no	IPF vs CONTROL UP	unique	1.2076e-164	0.0953409	0.193926	0	0	0.388021	0	0	0	0	0.0560673
ADIPOR1	ADIPOR1	ADIPOR1	chr1:202909959-202927700	IPF	CTRL	OK	41.3853	49.6878	-0.263774	-1.20062	1.01911	0.0175	0.0608883	no	IPF vs CONTROL DOWN	unique	43.0309	28.3571	38.9889	33.7748	60.4155	43.7446	53.5168	55.9346	42.3343	54.537	42.1164
ADIPOR2	ADIPOR2	ADIPOR2	chr12:1800246-1897845	IPF	CTRL	OK	18.6945	31.2964	-0.743382	-1.6741	2.12174	5e-05	0.000459061	yes	IPF vs CONTROL DOWN	unique	16.7185	15.4095	22.4338	20.5133	19.3188	17.7733	30.6081	36.0389	32.2644	29.4708	28.1
ADIRF	ADIRF	ADIRF	chr10:88728187-88769960	IPF	CTRL	OK	66.2724	161.716	-1.28698	-2.44017	2.36658	5e-05	0.000459061	yes	IPF vs CONTROL DOWN	unique	66.7906	83.2616	94.5186	50.3596	63.0087	39.6951	158.145	148.971	164.816	151.964	184.683
ADK	ADK	ADK	chr10:75910942-76469061	IPF	CTRL	OK	12.378	9.84981	0.329607	1.25667	-0.190978	0.64985	0.794619	no	IPF vs CONTROL UP	unique	10.2927	8.75826	14.6002	12.7435	16.2492	11.624	13.5389	7.8895	8.76742	9.03305	10.0202
ADM	ADM	ADM	chr11:10326641-10328923	IPF	CTRL	OK	7.9675	14.1595	-0.829567	-1.77715	1.45539	0.0005	0.00338298	yes	IPF vs CONTROL DOWN	unique	9.6	7.60401	10.3188	4.65288	8.61934	7.00997	9.28961	8.24014	31.1281	12.9052	9.23423
ADM2	ADM2	ADM2	chr22:50919984-50924866	IPF	CTRL	NOTEST	1.37478	0.45136	1.60685	3.04586	0	1	1	no	IPF vs CONTROL UP	unique	1.49387	2.10585	0.738211	1.39054	1.58859	0.931613	0.365319	0.295795	0.410957	0.375206	0.809521
ADM5	ADM5	ADM5	chr19:50191941-50194247	IPF	CTRL	OK	3.77127	3.0474	0.307469	1.23754	-0.0808317	0.84735	0.920906	no	IPF vs CONTROL UP	unique	3.48677	1.58801	3.48636	4.86352	4.19487	5.00807	1.89998	4.20365	2.41652	3.16644	3.55042
ADNP	ADNP	ADNP	chr20:49506882-49547527	IPF	CTRL	OK	40.9043	30.0883	0.44305	1.35947	-0.491303	0.25605	0.439934	no	IPF vs CONTROL UP	unique	39.5917	40.5962	35.4474	46.9083	42.2229	40.6594	31.4846	30.2777	30.054	27.2107	31.4146
ADNP2	ADNP2	ADNP2	chr18:77866914-77898228	IPF	CTRL	OK	11.2402	12.0057	-0.0950515	-1.0681	0.713715	0.0889	0.208313	no	IPF vs CONTROL DOWN	unique	10.7834	10.2313	9.20329	14.3959	11.9278	10.8993	12.8908	10.3865	15.4227	11.3165	10.0118
ADO	ADO	ADO	chr10:64564515-64568239	IPF	CTRL	OK	9.71559	8.78812	0.144747	1.10554	0.235111	0.58245	0.744916	no	IPF vs CONTROL UP	unique	11.658	8.61457	9.68611	9.05419	8.54887	10.7318	8.52518	9.30994	7.95387	8.79669	9.35493
ADORA1	ADORA1	ADORA1	chr1:203096835-203136533	IPF	CTRL	NOTEST	1.69361	1.25147	0.436486	1.3533	0	1	1	no	IPF vs CONTROL UP	unique	1.7878	2.27504	2.05175	1.32088	1.26442	1.46179	1.45965	1.53037	1.21492	1.27773	0.774656
ADORA2A	ADORA2A	ADORA2A	chr22:24823529-24890783	IPF	CTRL	OK	7.81213	9.37817	-0.26359	-1.20046	0.781769	0.06825	0.170924	no	IPF vs CONTROL DOWN	unique	9.06042	9.13467	4.92841	11.5476	6.54074	5.66097	6.55235	9.99088	6.67422	14.7922	8.88122
ADORA2A-AS1	ADORA2A-AS1	ADORA2A-AS1	chr22:24823529-24890783	IPF	CTRL	OK	3.19848	3.1011	0.0446047	1.0314	0.188069	0.6875	0.820332	no	IPF vs CONTROL UP	unique	3.54623	4.97609	1.93181	4.87253	1.89519	1.96902	1.97424	2.71801	2.90123	3.71107	4.20096
ADORA2B	ADORA2B	ADORA2B	chr17:15848230-15879210	IPF	CTRL	OK	5.67671	1.8866	1.58927	3.00897	-1.55453	0.00055	0.0036624	yes	IPF vs CONTROL UP	unique	7.23763	7.88248	3.93426	3.51053	7.30369	4.19166	2.58895	2.61623	1.21152	1.32951	1.68677
ADORA3	ADORA3	ADORA3	chr1:112025969-112106597	IPF	CTRL	OK	2.48205	2.42947	0.0308929	1.02164	0.166524	0.699	0.827654	no	IPF vs CONTROL UP	unique	2.23447	1.16928	1.99566	3.6534	4.17329	1.6662	3.37597	2.85784	3.10256	1.31891	1.49205
ADPGK	ADPGK	ADPGK	chr15:73043707-73090540	IPF	CTRL	OK	36.1213	22.5647	0.678783	1.60079	-0.877703	0.0418	0.117722	no	IPF vs CONTROL UP	unique	36.323	34.0043	25.5999	53.2551	32.8511	34.6947	31.6579	21.3068	19.6735	21.0112	19.1742
ADPGK-AS1	ADPGK-AS1	ADPGK-AS1	chr15:73043707-73090540	IPF	CTRL	NOTEST	1.47929	0.88727	0.737459	1.66724	0	1	1	no	IPF vs CONTROL UP	unique	1.85704	2.602	1.18155	1.17536	0.82062	1.23917	1.16725	0.809582	0.488817	0.754282	1.21642
ADPRH	ADPRH	ADPRH	chr3:119298522-119308792	IPF	CTRL	OK	6.12475	10.1437	-0.727864	-1.65618	1.64048	0.0001	0.000852984	yes	IPF vs CONTROL DOWN	unique	6.03513	5.24902	7.91355	5.85067	4.02965	7.6705	12.2274	11.5888	8.15101	9.77255	8.97886
ADPRHL1	ADPRHL1	ADPRHL1	chr13:114076259-114107839	IPF	CTRL	NOTEST	1.19071	0.755552	0.656222	1.57595	0	1	1	no	IPF vs CONTROL UP	unique	0.52538	0.902359	1.60262	0.442053	2.31128	1.36058	0.552977	0.36397	1.22047	0.684502	0.955839
ADPRHL2	ADPRHL2	ADPRHL2	chr1:36554452-36559533	IPF	CTRL	OK	32.5913	15.7939	1.04513	2.06355	-1.51238	0.0004	0.00281058	yes	IPF vs CONTROL UP	unique	21.7324	36.4129	14.1208	16.0106	71.8666	35.4048	16.9035	12.8525	12.5834	17.921	18.7089
ADPRM	ADPRM	ADPRM	chr17:10600926-10614875	IPF	CTRL	OK	6.63453	3.90184	0.765838	1.70036	-0.734473	0.08675	0.204668	no	IPF vs CONTROL UP	unique	4.96112	6.32668	4.60231	9.95626	6.14582	7.81496	4.28836	5.15506	3.81941	3.98495	2.26143
ADRA1A	ADRA1A	ADRA1A	chr8:26605666-26722922	IPF	CTRL	OK	2.04074	14.705	-2.84914	-7.2057	3.7053	5e-05	0.000459061	yes	IPF vs CONTROL DOWN	unique	1.75102	3.36203	1.63676	4.11596	0.121252	1.25742	5.04632	17.2356	21.479	16.1156	13.6483
ADRA1B	ADRA1B	ADRA1B	chr5:159343739-159400017	IPF	CTRL	OK	1.41408	2.07472	-0.553055	-1.46719	0.610585	0.1514	0.304913	no	IPF vs CONTROL DOWN	unique	0.911536	1.48267	1.42884	3.26991	0.335654	1.05585	1.77371	2.03014	2.75772	1.7186	2.09342
ADRA1D	ADRA1D	ADRA1D	chr20:4201277-4229659	IPF	CTRL	OK	0.801474	1.74584	-1.12319	-2.17829	1.39295	0.00225	0.0117535	yes	IPF vs CONTROL DOWN	unique	1.09203	0.746021	0.931622	1.21912	0.187582	0.632469	0.841687	1.92964	1.26155	1.8442	2.85212
ADRA2A	ADRA2A	ADRA2A	chr10:112836789-112840662	IPF	CTRL	OK	8.8738	3.06861	1.53197	2.8918	-2.06433	5e-05	0.000459061	yes	IPF vs CONTROL UP	unique	7.41455	10.4681	4.65088	5.38309	16.7374	8.58876	3.94116	1.69572	2.927	2.65946	4.11969
ADRA2B	ADRA2B	ADRA2B	chr2:96778622-96781888	IPF	CTRL	NOTEST	0.898776	0.661658	0.441875	1.35837	0	1	1	no	IPF vs CONTROL UP	unique	1.06105	1.30876	0.269305	0.61713	1.21461	0.921802	0.635877	0.643394	0.936428	0.559791	0.532802
ADRA2C	ADRA2C	ADRA2C	chr4:3768295-3770253	IPF	CTRL	OK	2.02543	3.16399	-0.643518	-1.56213	0.989202	0.02625	0.0833846	no	IPF vs CONTROL DOWN	unique	2.56893	2.75293	1.19796	2.3182	1.03909	2.27546	2.17549	3.76914	2.61811	3.51116	3.74605
ADRB1	ADRB1	ADRB1	chr10:115803805-115806667	IPF	CTRL	OK	3.73347	21.5917	-2.53189	-5.78327	4.41753	5e-05	0.000459061	yes	IPF vs CONTROL DOWN	unique	3.1439	0.808295	3.64568	7.64313	3.04818	4.11162	15.7619	24.246	23.5304	21.9415	22.4785
ADRB2	ADRB2	ADRB2	chr5:148206155-148208197	IPF	CTRL	OK	22.2451	37.2991	-0.745654	-1.67673	2.05452	5e-05	0.000459061	yes	IPF vs CONTROL DOWN	unique	21.8244	24.8492	18.0661	31.2459	13.0426	24.4423	29.8706	38.3039	43.962	42.8897	31.4692
ADRB3	ADRB3	ADRB3	chr8:37820513-37824184	IPF	CTRL	NOTEST	0.122756	0.18286	-0.57494	-1.48962	0	1	1	no	IPF vs CONTROL DOWN	unique	0.22013	0	0.268284	0.153591	0.0945332	0	0.0282781	0.343212	0	0.174262	0.368547
ADRBK1	ADRBK1	ADRBK1	chr11:67033904-67054029	IPF	CTRL	OK	43.7973	40.1426	0.125708	1.09104	0.173431	0.6849	0.818058	no	IPF vs CONTROL UP	unique	50.3009	53.7456	30.8929	49.1888	45.9839	32.6719	39.0774	45.1545	32.7969	46.7583	36.9261
ADRBK2	ADRBK2	ADRBK2	chr22:25960860-26125258	IPF	CTRL	OK	13.5212	7.90069	0.775177	1.7114	-1.23348	0.0031	0.015312	yes	IPF vs CONTROL UP	unique	13.1564	10.5778	9.88437	20.6452	13.6097	13.254	11.7047	6.15873	6.63511	7.41179	7.59313
ADRM1	ADRM1	ADRM1	chr20:60878026-60883918	IPF	CTRL	OK	14.168	22.2622	-0.651961	-1.5713	1.13543	0.00905	0.0359273	yes	IPF vs CONTROL DOWN	unique	16.6678	12.5698	16.8637	13.8731	13.7854	11.248	24.5608	22.0416	15.8305	24.4248	24.4531
ADSL	ADSL	ADSL	chr22:40742503-40762575	IPF	CTRL	OK	10.927	9.25695	0.239293	1.18041	-0.332353	0.4351	0.622352	no	IPF vs CONTROL UP	unique	11.2701	10.947	12.016	10.9881	9.42781	10.9132	12.8605	6.79342	5.06403	11.2558	10.311
ADSS	ADSS	ADSS	chr1:244571793-244615436	IPF	CTRL	OK	14.5317	11.6502	0.318842	1.24733	-0.343955	0.4056	0.594872	no	IPF vs CONTROL UP	unique	14.2061	13.4393	13.3022	11.6621	17.7619	16.8185	13.981	11.5091	11.9669	11.6309	9.1633
ADSSL1	ADSSL1	ADSSL1	chr14:105190533-105213647	IPF	CTRL	OK	2.3473	2.03539	0.205699	1.15325	-0.0385598	0.9296	0.964475	no	IPF vs CONTROL UP	unique	2.33756	2.83837	2.07156	2.51695	3.15895	1.16042	2.11926	1.23513	2.88767	1.59843	2.33645
ADTRP	ADTRP	ADTRP	chr6:11713887-11779280	IPF	CTRL	OK	1.63241	2.51911	-0.62591	-1.54318	0.890538	0.0389	0.111694	no	IPF vs CONTROL DOWN	unique	0.659457	2.81589	1.60905	2.52876	1.41748	0.763845	8.49188	1.19935	0.952088	0.957909	0.994345
AEBP1	AEBP1	AEBP1	chr7:44143959-44154159	IPF	CTRL	OK	62.0764	112.811	-0.861797	-1.8173	2.0246	5e-05	0.000459061	yes	IPF vs CONTROL DOWN	unique	60.7737	89.5138	79.5357	38.9456	56.079	47.6105	73.5503	109.485	150.654	103.056	127.312
AEBP2	AEBP2	AEBP2	chr12:19592607-19675173	IPF	CTRL	OK	14.8184	11.8613	0.321132	1.24931	-0.329605	0.44195	0.628058	no	IPF vs CONTROL UP	unique	12.5824	14.1143	15.0855	16.3871	13.5513	17.1899	12.1024	12.6969	11.857	10.0968	12.5533
AEN	AEN	AEN	chr15:89164526-89175512	IPF	CTRL	OK	10.2111	8.57029	0.252727	1.19146	-0.0840317	0.84245	0.918347	no	IPF vs CONTROL UP	unique	10.7692	10.9931	7.23915	12.9583	8.76827	10.5388	6.84377	8.39578	10.1	9.30673	8.20518
AES	AES	AES	chr19:3052907-3062964	IPF	CTRL	OK	112.833	194.619	-0.786462	-1.72484	2.1349	5e-05	0.000459061	yes	IPF vs CONTROL DOWN	unique	128.696	84.7216	124.497	91.7609	140.915	106.407	148.609	220.797	199.246	198.664	205.777
AFAP1	AFAP1	AFAP1	chr4:7755816-7941653	IPF	CTRL	OK	13.3962	11.5443	0.214645	1.16042	0.0247077	0.9533	0.976968	no	IPF vs CONTROL UP	unique	15.5515	18.0107	13.1589	10.413	8.54734	14.6959	7.68102	11.2491	12.3797	10.5512	15.8605
AFAP1-AS1	AFAP1-AS1	AFAP1-AS1	chr4:7755816-7941653	IPF	CTRL	OK	2.45241	1.31846	0.895345	1.86006	-0.44431	0.2869	0.475676	no	IPF vs CONTROL UP	unique	3.33328	3.50686	1.99773	1.45717	1.40608	3.01331	0.77015	1.50055	1.6278	0.866321	1.82747
AFAP1L1	AFAP1L1	AFAP1L1	chr5:148651400-148721367	IPF	CTRL	OK	7.32443	18.0257	-1.29927	-2.46104	2.6891	5e-05	0.000459061	yes	IPF vs CONTROL DOWN	unique	8.2185	10.3767	8.49032	5.41321	5.83704	5.6108	16.4328	20.7872	15.5206	15.3531	22.0348
AFAP1L2	AFAP1L2	AFAP1L2	chr10:116054582-116164515	IPF	CTRL	OK	5.58475	3.53319	0.660522	1.58065	-0.717149	0.1007	0.227077	no	IPF vs CONTROL UP	unique	4.70533	6.92343	5.27388	5.25568	4.89336	6.4568	2.6129	2.93323	2.92733	2.86383	6.32864
AFF1	AFF1	AFF1	chr4:87856153-88062206	IPF	CTRL	OK	44.5237	38.7615	0.199952	1.14866	-0.0113095	0.97825	0.989947	no	IPF vs CONTROL UP	unique	42.4204	44.1391	43.4173	50.6241	39.6865	46.855	33.3965	41.1899	41.0484	37.6328	40.5397
AFF2	AFF2	AFF2	chrX:147582138-148082193	IPF	CTRL	OK	1.03249	1.95644	-0.922104	-1.89488	1.82078	0.0001	0.000852984	yes	IPF vs CONTROL DOWN	unique	1.09279	0.399003	1.71771	1.58459	0.636508	0.764337	1.7464	3.0021	1.68813	1.71745	1.62812
AFF3	AFF3	AFF3	chr2:100163715-100759037	IPF	CTRL	OK	3.88451	13.0785	-1.7514	-3.36684	3.79671	5e-05	0.000459061	yes	IPF vs CONTROL DOWN	unique	3.09853	3.80534	4.63049	5.9337	3.01596	2.82303	12.2346	19.0177	13.076	10.6493	10.415
AFF4	AFF4	AFF4	chr5:132211070-132299354	IPF	CTRL	OK	33.856	33.1342	0.0310901	1.02178	0.331165	0.4264	0.615077	no	IPF vs CONTROL UP	unique	34.8655	36.5113	33.7778	33.7354	30.9872	33.259	35.9089	28.137	42.5375	27.3659	31.7219
AFG3L1P	AFG3L1P	AFG3L1P	chr16:90036182-90067195	IPF	CTRL	OK	10.3548	6.14776	0.752169	1.68432	-0.708052	0.10815	0.239387	no	IPF vs CONTROL UP	unique	8.97447	13.3469	6.96377	13.8824	8.18766	10.7737	4.90067	5.67762	8.00665	4.51328	7.64058
AFG3L2	AFG3L2	AFG3L2	chr18:12328942-12377275	IPF	CTRL	OK	11.6711	14.406	-0.303736	-1.23434	0.909729	0.03235	0.0973134	no	IPF vs CONTROL DOWN	unique	10.5357	8.81736	12.781	10.8098	14.1483	12.9342	15.4036	14.3216	15.3453	13.6352	13.3244
AFM	AFM	AFM	chr4:74347461-74369718	IPF	CTRL	NOTEST	0	0	0	1	0	1	1	no	IPF vs. CONTROL EQUAL(0)	unique	0	0	0	0	0	0	0	0	0	0	0
AFMID	AFMID	AFMID	chr17:76183397-76203782	IPF	CTRL	OK	12.2382	10.6117	0.205745	1.15328	0.174141	0.6867	0.819507	no	IPF vs CONTROL UP	unique	11.6009	11.9926	8.52425	16.4767	10.5713	14.2637	14.2591	13.417	7.34355	10.1719	7.86679
AFP	AFP	AFP	chr4:74301932-74321492	IPF	CTRL	NOTEST	0	0	0	1	0	1	1	no	IPF vs. CONTROL EQUAL(0)	unique	0	0	0	0	0	0	0	0	0	0	0
AFTPH	AFTPH	AFTPH	chr2:64751438-64820138	IPF	CTRL	OK	22.7824	16.051	0.50526	1.41938	-0.605483	0.16105	0.319757	no	IPF vs CONTROL UP	unique	19.3148	24.4354	18.6517	27.2852	24.866	22.1413	18.0572	17.5306	16.0114	13.3379	15.3177
AGA	AGA	AGA	chr4:178351928-178363657	IPF	CTRL	OK	4.19073	3.85858	0.119132	1.08608	-0.119516	0.7741	0.876642	no	IPF vs CONTROL UP	unique	4.12734	2.32311	5.30242	5.69145	2.12931	5.57077	5.98088	5.45276	2.52504	3.38148	1.95275
AGAP1	AGAP1	AGAP1	chr2:236402732-237040444	IPF	CTRL	OK	18.4114	18.8173	-0.0314629	-1.02205	0.183038	0.67295	0.8105	no	IPF vs CONTROL DOWN	unique	14.7701	19.4036	18.4458	17.3933	17.2047	23.2507	15.8845	25.0463	13.873	17.6063	21.6764
AGAP11	AGAP11	AGAP11	chr10:88728187-88769960	IPF	CTRL	OK	9.66575	8.71917	0.148691	1.10856	0.0936509	0.82505	0.908577	no	IPF vs CONTROL UP	unique	9.08438	13.9242	6.82242	16.2786	5.27208	6.61283	7.77592	10.1289	9.46516	6.00336	10.2225
AGAP2	AGAP2	AGAP2	chr12:58118075-58135944	IPF	CTRL	OK	4.85441	2.38136	1.02751	2.0385	-1.24122	0.00415	0.0192317	yes	IPF vs CONTROL UP	unique	4.66601	6.74088	3.56108	6.0081	4.94331	3.20707	2.83114	2.91282	1.86006	2.31283	1.98994
AGAP3	AGAP3	AGAP3	chr7:150783825-150841523	IPF	CTRL	OK	27.8811	33.2161	-0.252594	-1.19135	0.822709	0.05665	0.147989	no	IPF vs CONTROL DOWN	unique	28.1825	24.6685	24.7347	31.5963	29.2066	28.8981	26.3926	37.7352	30.443	34.4895	37.0202
AGAP4	AGAP4	AGAP4	chr10:46321049-46342921	IPF	CTRL	NOTEST	0.846308	0.507365	0.738158	1.66804	0	1	1	no	IPF vs CONTROL UP	unique	1.32303	0.136944	0.80636	0.839065	1.13654	0.835908	0.401777	0.75007	0.347349	0.634851	0.402779
AGAP5	AGAP5	AGAP5	chr10:75434032-75457554	IPF	CTRL	OK	3.59569	2.2386	0.683672	1.60622	-0.544688	0.19975	0.372249	no	IPF vs CONTROL UP	unique	3.01338	5.76408	1.54275	6.39066	2.07091	2.79238	2.10616	2.12979	2.32066	1.9723	2.6641
AGAP6	AGAP6	AGAP6	chr10:51748077-51770259	IPF	CTRL	OK	10.4187	5.58605	0.899282	1.86514	-1.13654	0.00665	0.0280459	yes	IPF vs CONTROL UP	unique	8.07339	12.1767	5.81368	17.7051	9.63478	9.10883	5.468	5.23125	5.95545	5.58835	5.68719
AGAP7	AGAP7	AGAP7	chr10:51464150-51486327	IPF	CTRL	NOTEST	0.727982	0.792125	-0.121825	-1.08811	0	1	1	no	IPF vs CONTROL DOWN	unique	0.360825	3.28665	0	0.167813	0.413286	0.139318	1.51439	0.125012	0.231566	0.317425	1.77223
AGAP8	AGAP8	AGAP8	chr10:51026324-51371331	IPF	CTRL	NOTEST	1.52301	0.451365	1.75456	3.37424	0	1	1	no	IPF vs CONTROL UP	unique	1.52902	1.01553	0.388332	3.3775	1.20419	1.62351	0.196466	0.132394	0.981236	0.60536	0.341371
AGAP9	AGAP9	AGAP9	chr10:48215723-48237508	IPF	CTRL	NOTEST	0.190742	0.0821855	1.21467	2.32087	0	1	1	no	IPF vs CONTROL UP	multiple	0.183904	0.209391	0.074727	0.342109	0.263313	0.071007	0.173278	0	0	0.0323579	0.205292
AGBL1	AGBL1	AGBL1	chr15:86685241-87572283	IPF	CTRL	OK	4.00595	11.8384	-1.56326	-2.9552	2.60895	5e-05	0.000459061	yes	IPF vs CONTROL DOWN	unique	1.40219	2.15997	7.13383	9.09655	0.708066	3.53512	22.6443	15.8623	7.862	4.26421	8.55917
AGBL2	AGBL2	AGBL2	chr11:47681142-47736928	IPF	CTRL	OK	12.3133	1.74091	2.82231	7.07292	-3.4724	5e-05	0.000459061	yes	IPF vs CONTROL UP	unique	4.40614	9.30373	1.36619	4.80916	39.6108	14.3837	2.6128	0.416393	1.00273	0.971989	3.70062
AGBL3	AGBL3	AGBL3	chr7:134671258-134820530	IPF	CTRL	NOTEST	1.41842	0.792217	0.840318	1.79044	0	1	1	no	IPF vs CONTROL UP	unique	0.896689	1.29939	0.844046	2.95882	1.18961	1.32197	0.523366	0.762654	0.941827	0.860055	0.873184
AGBL4	AGBL4	AGBL4	chr1:48998526-50489626	IPF	CTRL	OK	2.99046	0.507235	2.55964	5.89561	-1.59096	0.0161	0.0568396	no	IPF vs CONTROL UP	unique	0.290914	1.65614	0.945252	1.2181	10.5749	3.25746	0.722366	0.201597	0.280076	0.358168	0.973967
AGBL5	AGBL5	AGBL5	chr2:27274490-27294567	IPF	CTRL	OK	9.97973	7.23818	0.463375	1.37876	-0.323657	0.4502	0.636083	no	IPF vs CONTROL UP	unique	6.6021	9.53126	7.86773	10.2672	13.5122	12.0979	7.48923	6.08174	6.01331	7.08672	9.51988
AGER	AGER	AGER	chr6_ssto_hap7:3496472-3499827	IPF	CTRL	OK	3.23268	83.4187	-4.68957	-25.8048	7.71204	5e-05	0.000459061	yes	IPF vs CONTROL DOWN	multiple	1.63674	1.62246	8.87541	5.23636	0.997039	1.02805	52.4947	95.5497	98.1417	95.2753	75.6321
AGFG1	AGFG1	AGFG1	chr2:228336847-228425938	IPF	CTRL	OK	17.8298	15.3906	0.21224	1.15849	0.0780017	0.8555	0.924985	no	IPF vs CONTROL UP	unique	18.8068	18.2212	16.0666	18.4897	17.195	18.1997	18.5963	13.8943	16.9805	13.1534	14.3287
AGFG2	AGFG2	AGFG2	chr7:100136833-100165843	IPF	CTRL	OK	8.46242	5.79808	0.545496	1.45952	-0.646463	0.1264	0.267472	no	IPF vs CONTROL UP	unique	10.7407	7.70226	7.80385	6.79526	8.45266	9.2798	4.99691	6.4776	4.3426	6.54041	6.63287
AGGF1	AGGF1	AGGF1	chr5:76326209-76361058	IPF	CTRL	OK	10.2837	7.74384	0.409238	1.32798	-0.366761	0.37675	0.569145	no	IPF vs CONTROL UP	unique	9.95886	8.95552	10.4667	11.3379	9.9615	11.0217	8.50121	8.24298	7.57365	7.22594	7.17541
AGK	AGK	AGK	chr7:141251077-141354209	IPF	CTRL	OK	12.3048	8.18722	0.587775	1.50293	-0.577971	0.1736	0.337767	no	IPF vs CONTROL UP	unique	11.3024	15.5779	8.517	15.7745	9.4501	13.2069	8.63369	8.2445	7.06327	7.89957	9.09509
AGL	AGL	AGL	chr1:100315639-100389579	IPF	CTRL	OK	7.78792	4.76509	0.708733	1.63437	-1.15419	0.0077	0.0314244	yes	IPF vs CONTROL UP	unique	7.5843	7.03113	8.8433	6.7775	7.61136	8.87991	5.8146	4.8741	4.40394	4.19567	4.53715
AGMAT	AGMAT	AGMAT	chr1:15853351-15911605	IPF	CTRL	NOTEST	1.06028	0.486622	1.12357	2.17885	0	1	1	no	IPF vs CONTROL UP	unique	1.00845	1.1482	0.614328	0.895762	1.10199	1.59292	0.47095	0.381191	0.176528	0.483698	0.920743
AGMO	AGMO	AGMO	chr7:15239942-15601640	IPF	CTRL	NOTEST	0.299594	0.111681	1.42363	2.68259	0	1	1	no	IPF vs CONTROL UP	unique	0.354103	0.940747	0.071937	0.329384	0.101392	0	0.0303292	0.245367	0	0.124601	0.158106
AGO1	AGO1	AGO1	chr1:36348809-36389899	IPF	CTRL	OK	15.8467	15.0259	0.0767303	1.05463	0.191901	0.64685	0.792553	no	IPF vs CONTROL UP	unique	17.1469	15.7303	16.2641	13.8007	14.6428	17.4951	13.6878	18.1423	12.0288	15.4652	15.8052
AGO2	AGO2	AGO2	chr8:141541263-141645646	IPF	CTRL	OK	20.0857	20.3284	-0.0173263	-1.01208	0.212192	0.6254	0.777656	no	IPF vs CONTROL DOWN	unique	17.9187	22.0409	20.8057	25.6246	16.6758	17.4484	18.1794	17.883	28.1466	17.7597	19.6731
AGO3	AGO3	AGO3	chr1:36396682-36522063	IPF	CTRL	OK	15.7625	10.9371	0.527271	1.4412	-0.829484	0.04975	0.134056	no	IPF vs CONTROL UP	unique	12.866	19.7714	12.8836	18.9538	13.551	16.5492	12.5066	11.3233	8.66372	11.2005	10.9912
AGO4	AGO4	AGO4	chr1:36273827-36323490	IPF	CTRL	OK	15.8537	13.423	0.240115	1.18109	-0.114328	0.78285	0.882658	no	IPF vs CONTROL UP	unique	13.5638	16.3113	14.166	19.3954	15.8343	15.8516	14.7282	15.3536	11.0908	14.1537	11.7887
AGPAT1	AGPAT1	AGPAT1	chr6_ssto_hap7:3468303-3493616	IPF	CTRL	OK	4.12932	4.47664	-0.116513	-1.08411	0.416404	0.3336	0.526318	no	IPF vs CONTROL DOWN	multiple	3.98481	4.49001	4.69581	3.08706	4.11786	4.40036	3.62556	5.83333	3.89513	5.25883	3.77037
AGPAT2	AGPAT2	AGPAT2	chr9:139567594-139581911	IPF	CTRL	OK	21.339	44.9309	-1.07422	-2.10558	2.40899	5e-05	0.000459061	yes	IPF vs CONTROL DOWN	unique	32.4958	17.9198	20.9868	19.7305	19.0534	17.8474	38.887	51.7009	33.6633	51.9628	48.4406
AGPAT3	AGPAT3	AGPAT3	chr21:45285115-45407475	IPF	CTRL	OK	19.4009	18.7545	0.0488852	1.03447	0.331679	0.43715	0.62387	no	IPF vs CONTROL UP	unique	22.5755	16.0642	14.3856	19.587	22.9996	20.7935	17.7957	18.5885	14.7763	22.6055	20.0066
AGPAT4	AGPAT4	AGPAT4	chr6:161551056-161695107	IPF	CTRL	OK	8.8417	4.78477	0.885875	1.84788	-1.28772	0.0029	0.0145086	yes	IPF vs CONTROL UP	unique	7.75382	11.1578	6.00784	9.62831	9.02141	9.481	4.89191	4.03081	5.15077	3.91729	5.93305
AGPAT4-IT1	AGPAT4-IT1	AGPAT4-IT1	chr6:161551056-161695107	IPF	CTRL	OK	8.32576	5.40617	0.622974	1.54005	-0.34081	0.4277	0.616482	no	IPF vs CONTROL UP	unique	8.50216	8.21937	5.77258	11.1845	7.17119	9.10476	3.38215	4.50121	8.80083	3.89731	6.44937
AGPAT5	AGPAT5	AGPAT5	chr8:6565877-6619021	IPF	CTRL	OK	4.68324	3.19458	0.551881	1.466	-0.464634	0.27245	0.459359	no	IPF vs CONTROL UP	unique	5.1569	3.87517	3.48461	3.96131	5.70752	5.91394	3.58741	3.32401	3.22773	3.07271	2.76104
AGPAT6	AGPAT6	AGPAT6	chr8:41435706-41482520	IPF	CTRL	OK	17.4501	14.0961	0.307939	1.23794	-0.256634	0.53705	0.707643	no	IPF vs CONTROL UP	unique	15.4303	17.4659	13.3627	23.4379	16.556	18.4476	12.8747	16.0891	13.8191	15.9865	11.711
AGPAT9	AGPAT9	AGPAT9	chr4:84457066-84527027	IPF	CTRL	OK	2.6279	3.13493	-0.254527	-1.19294	0.700547	0.1049	0.233799	no	IPF vs CONTROL DOWN	unique	2.32421	3.27672	3.44057	1.79223	2.20632	2.72732	4.20679	2.44735	2.98794	2.99339	3.0392
AGPHD1	AGPHD1	AGPHD1	chr15:78799905-78829715	IPF	CTRL	OK	2.64236	1.91637	0.463449	1.37883	-0.0575036	0.8911	0.944798	no	IPF vs CONTROL UP	unique	2.23658	2.59167	1.8216	2.76865	3.26949	3.16615	1.15162	3.9397	1.09447	1.61037	1.78569
AGPS	AGPS	AGPS	chr2:178257470-178408564	IPF	CTRL	OK	9.70643	8.16874	0.248827	1.18824	-0.167614	0.69115	0.822524	no	IPF vs CONTROL UP	unique	10.0038	8.53197	10.986	9.23062	9.30889	10.1773	11.217	8.21328	6.43426	7.02531	7.95385
AGR2	AGR2	AGR2	chr7:16832263-16844738	IPF	CTRL	OK	34.5653	13.4919	1.35723	2.56193	-1.90564	5e-05	0.000459061	yes	IPF vs CONTROL UP	unique	24.3587	29.1961	22.1511	2.22941	99.7604	29.6961	26.1029	1.99735	5.24072	9.1626	24.956
AGR3	AGR3	AGR3	chr7:16899029-16921613	IPF	CTRL	OK	19.9651	15.8193	0.335799	1.26208	-0.125231	0.76425	0.870228	no	IPF vs CONTROL UP	unique	14.0091	3.48955	24.9523	7.2959	57.8763	12.1676	46.5671	0	5.05044	17.1804	10.2984
AGRN	AGRN	AGRN	chr1:955502-991499	IPF	CTRL	OK	37.7287	50.2815	-0.414363	-1.33271	1.13249	0.0073	0.0301411	yes	IPF vs CONTROL DOWN	unique	47.2297	23.5866	31.9204	30.8823	49.7281	43.0254	32.7439	53.8056	41.1269	66.1604	57.5707
AGRP	AGRP	AGRP	chr16:67516473-67517716	IPF	CTRL	OK	2.18175	0.86119	1.34108	2.53341	-0.582479	0.18725	0.355648	no	IPF vs CONTROL UP	unique	2.5702	3.90226	1.83742	1.18999	1.11022	2.48041	1.54812	1.33424	0	1.13571	0.287879
AGSK1	AGSK1	AGSK1	chr15:83130032-83182930	IPF	CTRL	NOTEST	0.175569	0.0869414	1.01392	2.01939	0	1	1	no	IPF vs CONTROL UP	multiple	0.304351	0.043218	0.185132	0.158945	0.0978683	0.263899	0.0878009	0.0789767	0.146203	0.0200334	0.101693
AGT	AGT	AGT	chr1:230838271-230850336	IPF	CTRL	NOTEST	1.53269	1.03184	0.570844	1.48539	0	1	1	no	IPF vs CONTROL UP	unique	1.80743	1.41482	1.72102	1.26104	1.55245	1.43935	0.55146	1.05675	1.19624	1.37125	0.983492
AGTPBP1	AGTPBP1	AGTPBP1	chr9:88161453-88356944	IPF	CTRL	OK	9.16503	11.2277	-0.292855	-1.22506	0.809327	0.0536	0.141782	no	IPF vs CONTROL DOWN	unique	6.73331	7.88748	7.68726	13.4705	9.61204	9.59962	13.6473	9.96137	11.0965	9.08273	12.3508
AGTR1	AGTR1	AGTR1	chr3:148415657-148460790	IPF	CTRL	OK	2.22821	5.19174	-1.22033	-2.33001	1.76805	0.0001	0.000852984	yes	IPF vs CONTROL DOWN	unique	1.84368	2.24915	4.17179	1.99513	1.58413	1.52538	7.21412	5.23441	5.22083	5.64292	2.64644
AGTR2	AGTR2	AGTR2	chrX:115301957-115306225	IPF	CTRL	OK	0.498803	3.83437	-2.94245	-7.68714	2.9279	5e-05	0.000459061	yes	IPF vs CONTROL DOWN	unique	0.400277	1.48118	0.853566	0	0.257796	0	3.80451	4.88884	3.66092	5.54442	1.27315
AGTRAP	AGTRAP	AGTRAP	chr1:11796141-11810828	IPF	CTRL	OK	22.6738	26.9179	-0.247541	-1.18718	0.729217	0.08965	0.209455	no	IPF vs CONTROL DOWN	unique	18.8784	24.8209	17.3542	21.0943	35.9442	17.9509	24.4248	31.4407	25.1515	28.2264	25.3463
AGXT	AGXT	AGXT	chr2:241808161-241818536	IPF	CTRL	NOTEST	0.0269145	0.0613064	-1.18765	-2.27782	0	1	1	no	IPF vs CONTROL DOWN	unique	0	0	0	0	0.161487	0	0	0	0.180689	0	0.125843
AGXT2	AGXT2	AGXT2	chr5:34998205-35048240	IPF	CTRL	NOTEST	0	0	0	1	0	1	1	no	IPF vs. CONTROL EQUAL(0)	unique	0	0	0	0	0	0	0	0	0	0	0
AGXT2L1	AGXT2L1	AGXT2L1	chr4:109663201-109684235	IPF	CTRL	NOTEST	0	0	0	1	0	1	1	no	IPF vs. CONTROL EQUAL(0)	unique	0	0	0	0	0	0	0	0	0	0	0
AGXT2L2	AGXT2L2	AGXT2L2	chr5:177631507-177659803	IPF	CTRL	OK	21.4611	17.2484	0.315264	1.24424	-0.0893889	0.83165	0.912154	no	IPF vs CONTROL UP	unique	20.2499	25.8969	12.5266	27.424	22.9531	19.7163	17.3893	16.1653	13.983	17.6663	21.0381
AHCTF1	AHCTF1	AHCTF1	chr1:247002401-247094726	IPF	CTRL	OK	6.32628	4.54811	0.47609	1.39097	-0.582064	0.15715	0.313989	no	IPF vs CONTROL UP	unique	6.48016	6.59552	6.39331	7.407	5.69818	5.38353	5.57687	3.70902	5.64162	3.43326	4.3798
AHCTF1P1	AHCTF1P1	AHCTF1P1	chr2:162355577-162364413	IPF	CTRL	OK	7.64318	5.65024	0.435861	1.35272	-0.455852	0.27525	0.462126	no	IPF vs CONTROL UP	unique	6.77529	7.20464	7.27374	10.4477	7.34582	6.81191	5.95423	5.54909	6.40158	5.4921	4.8542
AHCY	AHCY	AHCY	chr20:32868070-32899608	IPF	CTRL	OK	14.1579	13.2081	0.10018	1.07191	0.179952	0.66925	0.807846	no	IPF vs CONTROL UP	unique	19.4388	9.24731	15.0969	8.35791	17.8467	14.9595	14.7141	11.6239	12.0473	14.9015	12.7537
AHCYL1	AHCYL1	AHCYL1	chr1:110527386-110566364	IPF	CTRL	OK	28.1067	30.4748	-0.116701	-1.08425	0.659973	0.1264	0.267472	no	IPF vs CONTROL DOWN	unique	28.409	19.8164	33.7493	26.0972	28.4728	32.0956	30.5474	27.6551	35.1987	29.4537	29.519
AHCYL2	AHCYL2	AHCYL2	chr7:128864854-129070052	IPF	CTRL	OK	28.1045	42.1144	-0.583514	-1.49849	1.53187	0.0006	0.00394505	yes	IPF vs CONTROL DOWN	unique	34.4416	13.2179	40.1686	30.8848	21.6214	28.2926	52.606	40.1666	39.7674	36.1638	41.8683
AHDC1	AHDC1	AHDC1	chr1:27860755-27930143	IPF	CTRL	OK	16.9745	13.3973	0.34142	1.267	-0.29459	0.4831	0.663464	no	IPF vs CONTROL UP	unique	20.4401	21.2832	9.30439	17.5088	16.2605	17.0499	7.70134	14.8484	12.7015	14.7835	16.952
AHI1	AHI1	AHI1	chr6:135605109-135818903	IPF	CTRL	OK	24.4719	11.3835	1.10418	2.14977	-1.85858	5e-05	0.000459061	yes	IPF vs CONTROL UP	unique	21.4732	28.5035	18.82	23.4063	29.4794	25.149	15.479	8.88777	17.7368	5.98593	8.82804
AHNAK	AHNAK	AHNAK	chr11:62201013-62314332	IPF	CTRL	OK	288.861	534.587	-0.888052	-1.85068	0.1145	0.13735	0.283747	no	IPF vs CONTROL DOWN	unique	259.078	248.065	390.836	288.47	276.759	269.955	473.862	600.148	579.695	536.213	483.017
AHNAK2	AHNAK2	AHNAK2	chr14:105403590-105444694	IPF	CTRL	OK	11.0529	5.4161	1.0291	2.04075	-1.86195	5e-05	0.000459061	yes	IPF vs CONTROL UP	unique	9.96934	11.1065	14.9251	7.27582	10.5697	12.4711	3.26495	4.42659	5.23571	8.11905	6.03422
AHR	AHR	AHR	chr7:17338275-17385775	IPF	CTRL	OK	59.1609	64.3221	-0.12067	-1.08724	0.700307	0.09655	0.220609	no	IPF vs CONTROL DOWN	unique	68.9907	48.0719	66.6426	47.5474	66.7488	56.964	71.1945	48.196	69.98	65.7534	66.4865
AHRR	AHRR	AHRR	chr5:271735-438405	IPF	CTRL	NOTEST	1.25854	0.92095	0.450554	1.36656	0	1	1	no	IPF vs CONTROL UP	unique	3.04508	1.09785	0.339818	1.06325	0.65311	1.35212	0.924971	1.21352	0.73302	1.25775	0.475489
AHSA1	AHSA1	AHSA1	chr14:77924372-77935815	IPF	CTRL	OK	18.963	17.9507	0.0791468	1.05639	0.286845	0.50455	0.681354	no	IPF vs CONTROL UP	unique	15.165	16.0339	19.1779	10.2627	39.3377	13.8009	24.4179	15.3066	12.508	16.6046	20.9165
AHSA2	AHSA2	AHSA2	chr2:61404554-61697849	IPF	CTRL	OK	62.6705	41.5351	0.593456	1.50886	-0.356334	0.4025	0.592333	no	IPF vs CONTROL UP	unique	62.0069	74.7335	45.1098	55.8749	62.2666	76.031	37.6222	50.6499	42.1284	28.0794	49.1954
AHSG	AHSG	AHSG	chr3:186330849-186339107	IPF	CTRL	NOTEST	0	0.0256006	#NAME?	0	0	1	1	no	IPF vs CONTROL DOWN (0)	unique	0	0	0	0	0	0	0	0	0	0	0.128003
AHSP	AHSP	AHSP	chr16:31539202-31540124	IPF	CTRL	NOTEST	0	0.110394	#NAME?	0	0	1	1	no	IPF vs CONTROL DOWN (0)	unique	0	0	0	0	0	0	0.551968	0	0	0	0
AICDA	AICDA	AICDA	chr12:8754761-8765442	IPF	CTRL	NOTEST	0.0370648	0.0246129	0.590636	1.50591	0	1	1	no	IPF vs CONTROL UP	unique	0.103989	0.1184	0	0	0	0	0.0534291	0	0	0	0.0696354
AIDA	AIDA	AIDA	chr1:222841354-222885864	IPF	CTRL	OK	4.01959	4.22283	-0.0711623	-1.05056	0.632795	0.1375	0.284018	no	IPF vs CONTROL DOWN	unique	3.95108	4.60835	5.10777	2.28656	3.47541	4.68835	4.52997	4.40755	4.54613	4.017	3.61349
AIF1	AIF1	AIF1	chr6_ssto_hap7:2913800-2915605	IPF	CTRL	OK	2.1527	4.17887	-0.956965	-1.94122	1.41846	0.0016	0.00886554	yes	IPF vs CONTROL DOWN	multiple	2.37112	2.24295	3.25042	1.00015	3.53095	0.520607	6.87195	2.73947	4.2008	4.06418	3.01793
AIF1L	AIF1L	AIF1L	chr9:133971862-133998539	IPF	CTRL	OK	8.83825	15.3872	-0.799897	-1.74098	1.91728	5e-05	0.000459061	yes	IPF vs CONTROL DOWN	unique	5.03217	6.49346	14.2669	7.65667	8.75922	10.8211	8.57294	22.4939	5.44586	30.8397	9.58357
AIFM1	AIFM1	AIFM1	chrX:129263337-129299861	IPF	CTRL	OK	5.15068	4.94552	0.0586422	1.04149	0.070586	0.8688	0.932775	no	IPF vs CONTROL UP	unique	5.5045	5.48169	6.38915	3.67097	4.8032	5.05459	4.31458	5.68277	4.68708	4.49602	5.54714
AIFM2	AIFM2	AIFM2	chr10:71812356-71892690	IPF	CTRL	OK	6.67006	5.72112	0.2214	1.16586	0.0388318	0.928	0.964084	no	IPF vs CONTROL UP	unique	7.56023	6.48083	6.6645	5.83409	5.6507	7.82999	5.0491	6.19552	5.48018	5.86602	6.0148
AIFM3	AIFM3	AIFM3	chr22:21319417-21335649	IPF	CTRL	NOTEST	0.624266	0.436346	0.516688	1.43067	0	1	1	no	IPF vs CONTROL UP	unique	0.374757	0.580303	0.3046	1.59981	0.328374	0.557754	0.687648	0.26481	0.367919	0.605348	0.256007
AIG1	AIG1	AIG1	chr6:143382022-143661441	IPF	CTRL	OK	11.262	11.06	0.0261156	1.01827	0.197401	0.63985	0.787477	no	IPF vs CONTROL UP	unique	9.64471	6.98836	16.9961	8.85639	11.8845	13.202	12.9739	8.65448	11.3899	13.9043	8.37732
AIM1	AIM1	AIM1	chr6:106959729-107018334	IPF	CTRL	OK	14.402	8.33614	0.788817	1.72766	-1.26278	0.0023	0.0119529	yes	IPF vs CONTROL UP	unique	15.2525	12.2457	12.9091	17.0663	14.7863	14.1521	10.8201	7.55878	8.73337	7.54697	7.0215
AIM1L	AIM1L	AIM1L	chr1:26648349-26680621	IPF	CTRL	OK	0.478782	1.70329	-1.83088	-3.55754	2.28976	5e-05	0.000459061	yes	IPF vs CONTROL DOWN	unique	0.651869	0.309248	0.198424	0.834529	0.186436	0.692187	0.292846	1.41188	3.03387	2.57807	1.19977
AIM2	AIM2	AIM2	chr1:159032274-159046647	IPF	CTRL	OK	2.91405	0.705237	2.04685	4.13202	-1.96374	0.00015	0.00122565	yes	IPF vs CONTROL UP	unique	2.44041	4.3996	1.61366	4.81784	2.79948	1.41331	1.15108	1.05657	0.587109	0.322428	0.408997
AIMP1	AIMP1	AIMP1	chr4:106967232-107270381	IPF	CTRL	OK	7.8403	8.74548	-0.157629	-1.11545	0.286028	0.5122	0.687761	no	IPF vs CONTROL DOWN	unique	7.86634	6.1577	8.2484	6.13318	10.53	8.10619	10.0422	9.3787	8.35229	6.6575	9.29673
AIMP2	AIMP2	AIMP2	chr7:6048881-6098860	IPF	CTRL	OK	3.58479	2.50065	0.519589	1.43355	-0.0680662	0.9223	0.961459	no	IPF vs CONTROL UP	unique	5.54003	5.61141	4.74724	0	2.89544	2.71464	4.31078	2.6218	1.79159	1.58092	2.19814
AIP	AIP	AIP	chr11:67250504-67258579	IPF	CTRL	OK	13.4912	24.1813	-0.84187	-1.79237	1.47811	0.00055	0.0036624	yes	IPF vs CONTROL DOWN	unique	12.1987	16.1576	19.9215	9.3608	13.5051	9.80363	24.0992	26.1223	28.9824	25.6729	16.0296
AIPL1	AIPL1	AIPL1	chr17:6327058-6338519	IPF	CTRL	NOTEST	0.020135	0	Inf	0	0	1	1	no	IPF vs CONTROL UP (0)	unique	0	0	0	0	0	0.12081	0	0	0	0	0
AIRE	AIRE	AIRE	chr21:45705720-45718102	IPF	CTRL	NOTEST	0.0672336	0.0330668	1.0238	2.03327	0	1	1	no	IPF vs CONTROL UP	unique	0	0	0.0777423	0.177928	0	0.147731	0.0327759	0.132558	0	0	0
AIRN	AIRN	AIRN	chr6:160390130-160527583	IPF	CTRL	OK	1.89951	1.34763	0.495208	1.40952	-0.115309	0.68475	0.818058	no	IPF vs CONTROL UP	unique	2.64407	2.0786	1.12218	1.55331	1.57365	2.42525	1.25352	2.04052	0.818978	1.31126	1.31385
AJAP1	AJAP1	AJAP1	chr1:4715104-4843851	IPF	CTRL	NOTEST	0.614247	1.13644	-0.887625	-1.85013	0	1	1	no	IPF vs CONTROL DOWN	unique	0.997247	0.487694	0.173726	0.138471	1.54357	0.344775	0.94099	0.14806	3.23689	0.226798	1.12944
AJUBA	AJUBA	AJUBA	chr14:23440409-23451848	IPF	CTRL	OK	8.89698	13.9903	-0.653041	-1.57248	1.76028	5e-05	0.000459061	yes	IPF vs CONTROL DOWN	unique	10.618	4.34065	8.88958	7.76651	9.00313	12.764	9.40307	15.8314	13.0571	17.0324	14.6276
AK1	AK1	AK1	chr9:130628758-130640022	IPF	CTRL	OK	13.6237	27.7741	-1.02762	-2.03866	2.33149	5e-05	0.000459061	yes	IPF vs CONTROL DOWN	unique	13.5968	15.6287	13.9718	16.0779	13.0174	9.44969	27.7882	33.2434	22.936	25.4984	29.4045
AK2	AK2	AK2	chr1:33473540-33502512	IPF	CTRL	OK	37.7589	27.0022	0.48374	1.39836	-0.631067	0.1455	0.295823	no	IPF vs CONTROL UP	unique	44.7374	33.9288	35.0322	38.3555	30.1024	44.3974	25.4652	29.5018	28.7612	21.851	29.432
AK3	AK3	AK3	chr9:4709556-4742043	IPF	CTRL	OK	16.2466	13.0593	0.315065	1.24407	-0.258573	0.53885	0.709213	no	IPF vs CONTROL UP	unique	13.9703	14.9958	16.5481	15.7918	16.5127	19.6609	13.8324	11.8858	15.1042	11.2934	13.1805
AK4	AK4	AK4	chr1:65613231-65697828	IPF	CTRL	OK	3.06011	0.800839	1.934	3.82112	-2.48766	5e-05	0.000459061	yes	IPF vs CONTROL UP	unique	4.3245	2.10969	3.85745	0.86272	3.53289	3.67339	0.708164	0.884049	0.594745	0.824928	0.99231
AK5	AK5	AK5	chr1:77747661-78025654	IPF	CTRL	NOTEST	0.528906	0.380226	0.476155	1.39103	0	1	1	no	IPF vs CONTROL UP	unique	0.607571	0.494117	0.687308	0.509159	0.372578	0.502701	0.490427	0.270672	0.250696	0.366329	0.523004
AK7	AK7	AK7	chr14:96858447-96955764	IPF	CTRL	OK	3.53474	1.16785	1.59775	3.02671	-1.99385	5e-05	0.000459061	yes	IPF vs CONTROL UP	unique	1.22468	2.58959	1.33214	0.488443	11.1151	4.45851	1.93219	0.272799	0.673775	0.96917	1.99131
AK8	AK8	AK8	chr9:135600964-135754198	IPF	CTRL	OK	4.13999	1.23049	1.7504	3.36451	-1.54191	0.0003	0.00220617	yes	IPF vs CONTROL UP	unique	0.559562	2.86702	0.852899	1.561	14.7865	4.21296	1.5821	0.726948	1.07724	0.517022	2.24913
AKAP1	AKAP1	AKAP1	chr17:55162552-55198710	IPF	CTRL	OK	22.4415	15.3276	0.550038	1.46412	-0.847526	0.04785	0.130491	no	IPF vs CONTROL UP	unique	23.5424	22.2952	20.399	25.546	18.683	24.1836	17.072	14.673	12.0461	17.7431	15.1039
AKAP10	AKAP10	AKAP10	chr17:19807764-19881169	IPF	CTRL	OK	19.1638	11.3633	0.754004	1.68647	-1.15263	0.0071	0.0295814	yes	IPF vs CONTROL UP	unique	14.9298	18.8229	15.2124	22.9806	21.4404	21.5967	14.4931	11.735	9.3964	10.5639	10.628
AKAP11	AKAP11	AKAP11	chr13:42846288-42897403	IPF	CTRL	OK	27.9981	22.4316	0.319802	1.24816	-0.268137	0.5233	0.696247	no	IPF vs CONTROL UP	unique	24.8446	27.5102	27.2439	32.4472	28.6447	27.2983	24.5022	24.5311	19.4364	22.386	21.3021
AKAP12	AKAP12	AKAP12	chr6:151561133-151679694	IPF	CTRL	OK	21.8326	28.6616	-0.392635	-1.31279	1.21445	0.00405	0.0189129	yes	IPF vs CONTROL DOWN	unique	14.9835	22.4338	36.9871	13.6498	21.9235	21.018	17.6801	25.1581	42.1177	28.6619	29.6903
AKAP13	AKAP13	AKAP13	chr15:85923846-86292589	IPF	CTRL	OK	79.2123	88.1572	-0.154354	-1.11292	0.474146	0.2827	0.470721	no	IPF vs CONTROL DOWN	unique	73.4898	70.2091	83.8116	124.745	57.8929	65.1254	96.6252	92.1709	105.059	70.5451	76.3859
AKAP14	AKAP14	AKAP14	chrX:119029935-119054679	IPF	CTRL	OK	3.75857	0.635262	2.56476	5.91657	-1.32664	0.14715	0.298577	no	IPF vs CONTROL UP	unique	1.56271	2.89389	0.48176	0	15.8339	1.77918	0.969304	0	0	0.405946	1.80106
AKAP17A	AKAP17A	AKAP17A	chrY:1660485-1711974	IPF	CTRL	NOTEST	0	0	0	1	0	1	1	no	IPF vs. CONTROL EQUAL(0)	multiple	0	0	0	0	0	0	0	0	0	0	0
AKAP2	AKAP2	AKAP2	chr9:112403067-112934791	IPF	CTRL	OK	27.3806	93.2468	-1.7679	-3.40558	3.03765	5e-05	0.000459061	yes	IPF vs CONTROL DOWN	unique	24.9027	30.7829	37.9107	23.1303	18.0195	29.5373	57.8141	104.136	112.952	106.873	84.4588
AKAP3	AKAP3	AKAP3	chr12:4724675-4754343	IPF	CTRL	NOTEST	0.843944	0.363897	1.21362	2.31918	0	1	1	no	IPF vs CONTROL UP	unique	0.76723	0.327582	0.467415	0.936998	1.56463	0.999809	0.172442	0.199379	0.184663	0.556631	0.706371
AKAP4	AKAP4	AKAP4	chrX:49955410-49965664	IPF	CTRL	NOTEST	0	0	0	1	0	1	1	no	IPF vs. CONTROL EQUAL(0)	unique	0	0	0	0	0	0	0	0	0	0	0
AKAP5	AKAP5	AKAP5	chr14:64932216-64941221	IPF	CTRL	OK	4.19758	2.39551	0.809227	1.75227	-1.08038	0.01285	0.0476769	yes	IPF vs CONTROL UP	unique	5.33593	3.53561	3.91337	5.68159	2.51381	4.20517	2.70545	3.00116	1.85316	2.39821	2.01955
AKAP6	AKAP6	AKAP6	chr14:32798478-33302268	IPF	CTRL	OK	10.0493	6.08746	0.723183	1.65082	-0.992117	0.02015	0.0680759	no	IPF vs CONTROL UP	unique	8.43873	11.4616	6.7365	7.43045	12.1468	14.0817	4.92268	4.17541	10.9489	4.09054	6.29975
AKAP7	AKAP7	AKAP7	chr6:131456825-131604675	IPF	CTRL	OK	10.2061	6.5745	0.634486	1.55238	-0.566273	0.18965	0.358543	no	IPF vs CONTROL UP	unique	8.75501	3.41561	10.5366	20.0773	5.09317	13.3592	8.51248	5.92507	5.11787	5.42198	7.89509
AKAP8	AKAP8	AKAP8	chr19:15464331-15490612	IPF	CTRL	OK	19.6909	12.7061	0.632008	1.54972	-0.704766	0.0962	0.220108	no	IPF vs CONTROL UP	unique	18.2066	23.691	13.3168	23.8286	19.048	20.0542	13.4217	13.5188	12.1298	12.4344	12.0257
AKAP8L	AKAP8L	AKAP8L	chr19:15490858-15529833	IPF	CTRL	OK	18.8991	17.5365	0.107954	1.0777	-0.199576	0.63285	0.782231	no	IPF vs CONTROL UP	unique	17.8344	23.6377	14.781	18.2686	20.4744	18.3984	19.1598	15.3497	12.607	18.5382	22.0279
AKAP9	AKAP9	AKAP9	chr7:91570188-91739987	IPF	CTRL	OK	30.7538	22.3735	0.458975	1.37456	-0.56791	0.18555	0.353394	no	IPF vs CONTROL UP	unique	20.5586	30.6919	26.7684	33.434	44.6727	28.3975	24.8655	21.2582	24.2171	16.6835	24.8433
AKD1	AKD1	AKD1	chr6:109814058-110012415	IPF	CTRL	OK	8.33274	2.67876	1.63723	3.11067	-1.94102	0.0001	0.000852984	yes	IPF vs CONTROL UP	unique	4.07099	6.59452	4.25057	4.49614	19.194	11.3902	3.2596	2.42997	1.45628	2.07238	4.17557
AKIP1	AKIP1	AKIP1	chr11:8932700-8954553	IPF	CTRL	OK	9.0107	6.50771	0.46949	1.38462	-0.0459269	0.90195	0.95103	no	IPF vs CONTROL UP	unique	7.55561	9.22015	6.20821	6.01254	11.6248	13.4429	5.99391	4.48651	7.28205	7.13835	7.63772
AKIRIN1	AKIRIN1	AKIRIN1	chr1:39456915-39471737	IPF	CTRL	OK	23.6832	22.7089	0.0606057	1.0429	0.457543	0.281	0.46918	no	IPF vs CONTROL UP	unique	26.6589	21.147	19.4683	26.689	24.9428	23.1929	25.407	21.9869	26.4234	18.708	21.019
AKIRIN2	AKIRIN2	AKIRIN2	chr6:88384577-88411985	IPF	CTRL	OK	17.3058	19.0304	-0.137055	-1.09966	0.698261	0.10205	0.229336	no	IPF vs CONTROL DOWN	unique	16.247	15.183	17.853	19.6651	16.6003	18.2863	21.8696	16.5663	17.7034	19.9118	19.1011
AKNA	AKNA	AKNA	chr9:117096432-117156685	IPF	CTRL	OK	41.6954	28.8872	0.529455	1.44338	-0.693846	0.0993	0.225127	no	IPF vs CONTROL UP	unique	35.5089	49.1609	26.6523	50.3529	53.4495	35.0477	26.4836	30.4196	30.0956	26.9277	30.5097
AKNAD1	AKNAD1	AKNAD1	chr1:109358519-109401146	IPF	CTRL	NOTEST	0.126364	0.106476	0.247056	1.18678	0	1	1	no	IPF vs CONTROL UP	unique	0	0.226796	0.182056	0.263817	0.0855174	0	0.0511685	0.103516	0.191768	0.0525488	0.133381
AKR1A1	AKR1A1	AKR1A1	chr1:46016454-46035723	IPF	CTRL	OK	22.3349	21.9423	0.0255837	1.01789	0.169545	0.6914	0.822524	no	IPF vs CONTROL UP	unique	20.5993	22.4977	25.7814	15.5484	28.1344	21.4482	32.5009	19.2734	18.8005	24.7412	14.3956
AKR1B1	AKR1B1	AKR1B1	chr7:134127106-134143888	IPF	CTRL	OK	12.7794	17.0034	-0.412002	-1.33053	1.08874	0.0098	0.0383816	yes	IPF vs CONTROL DOWN	unique	8.89618	15.5647	17.2209	12.3948	15.3115	7.28819	24.2885	14.8795	14.8242	17.204	13.8206
AKR1B10	AKR1B10	AKR1B10	chr7:134212343-134226166	IPF	CTRL	NOTEST	0.0554138	0	Inf	0	0	1	1	no	IPF vs CONTROL UP (0)	unique	0	0	0.114721	0	0	0.217762	0	0	0	0	0
AKR1B15	AKR1B15	AKR1B15	chr7:134233848-134264592	IPF	CTRL	NOTEST	0	0	0	1	0	1	1	no	IPF vs. CONTROL EQUAL(0)	unique	0	0	0	0	0	0	0	0	0	0	0
AKR1C1	AKR1C1	AKR1C1	chr10:5005453-5020158	IPF	CTRL	OK	7.25863	6.40308	0.18093	1.13361	-0.0485934	0.90575	0.95306	no	IPF vs CONTROL UP	unique	6.16664	9.02763	5.51304	3.06836	12.8887	6.88739	5.95103	7.55133	6.56958	7.21807	4.7254
AKR1C2	AKR1C2	AKR1C2	chr10:5029967-5060225	IPF	CTRL	OK	6.10926	3.322	0.878946	1.83903	-0.679932	0.11945	0.256929	no	IPF vs CONTROL UP	unique	11.4536	7.44139	4.78189	5.22288	2.47771	5.27808	4.56112	4.04471	2.72545	2.19665	3.08206
AKR1C3	AKR1C3	AKR1C3	chr10:5090957-5149878	IPF	CTRL	OK	6.02068	7.44742	-0.306814	-1.23697	0.469434	0.27635	0.463305	no	IPF vs CONTROL DOWN	unique	5.97044	6.11214	4.56373	2.67905	10.2282	6.57054	11.3098	7.7602	3.94489	7.46257	6.75965
AKR1C4	AKR1C4	AKR1C4	chr10:5238797-5260910	IPF	CTRL	NOTEST	0.0869752	0.0612834	0.505107	1.41923	0	1	1	no	IPF vs CONTROL UP	unique	0	0	0	0	0.222552	0.299299	0.133078	0	0	0	0.173339
AKR1C6P	AKR1C6P	AKR1C6P	chr10:4913858-4958465	IPF	CTRL	NOTEST	0.134262	0.105042	0.35409	1.27818	0	1	1	no	IPF vs CONTROL UP	unique	0	0	0	0.302547	0	0.503025	0.0558792	0	0.208953	0.114783	0.145593
AKR1CL1	AKR1CL1	AKR1CL1	chr10:5196654-5227150	IPF	CTRL	NOTEST	0.255145	0.121661	1.06845	2.09718	0	1	1	no	IPF vs CONTROL UP	unique	0.138432	0.630471	0.0843984	0	0.356876	0.320695	0.249068	0	0.266503	0	0.092735
AKR1D1	AKR1D1	AKR1D1	chr7:137761177-137803050	IPF	CTRL	NOTEST	0.021742	0.0301786	-0.473041	-1.38803	0	1	1	no	IPF vs CONTROL DOWN	unique	0	0	0	0	0	0.130452	0	0	0	0	0.150893
AKR1E2	AKR1E2	AKR1E2	chr10:4868368-4890251	IPF	CTRL	OK	2.13236	3.15289	-0.564224	-1.47859	0.630545	0.13305	0.277742	no	IPF vs CONTROL DOWN	unique	1.43929	2.1022	2.50992	2.83519	1.76907	2.13849	3.71412	5.24048	2.48776	2.11661	2.20548
AKR7A2	AKR7A2	AKR7A2	chr1:19629201-19638640	IPF	CTRL	OK	9.07468	9.16188	-0.0137963	-1.00961	0.434653	0.3077	0.499529	no	IPF vs CONTROL DOWN	unique	8.45509	8.9935	8.81335	5.89924	11.8487	10.4382	7.86042	9.48217	8.24672	9.86397	10.3561
AKR7A2P1	AKR7A2P1	AKR7A2P1	chr1:113454469-113498975	IPF	CTRL	NOTEST	1.36639	1.14567	0.254185	1.19266	0	1	1	no	IPF vs CONTROL UP	unique	1.15121	1.57296	0.843582	2.24509	1.58549	0.800023	1.1852	0.717643	0.886157	1.70418	1.23515
AKR7A3	AKR7A3	AKR7A3	chr1:19609056-19615280	IPF	CTRL	NOTEST	0.791308	0.513025	0.62521	1.54244	0	1	1	no	IPF vs CONTROL UP	unique	1.23593	1.40728	0.301978	1.37698	0.425677	0	0.509098	0.513608	0.71348	0	0.828937
AKR7L	AKR7L	AKR7L	chr1:19592475-19600568	IPF	CTRL	NOTEST	0.489798	0.22948	1.09382	2.13439	0	1	1	no	IPF vs CONTROL UP	unique	0	0.475198	0.254454	1.16432	0.239096	0.805722	0.393346	0.433761	0.133903	0	0.186388
AKT1	AKT1	AKT1	chr14:105235686-105262080	IPF	CTRL	OK	45.2594	58.4479	-0.368935	-1.2914	1.25371	0.0034	0.016461	yes	IPF vs CONTROL DOWN	unique	48.3079	40.0958	44.9064	47.5364	47.9767	42.7332	53.1863	63.4062	51.8642	66.7911	56.9919
AKT1S1	AKT1S1	AKT1S1	chr19:50372296-50380644	IPF	CTRL	OK	13.6082	17.3886	-0.353666	-1.2778	0.908761	0.0356	0.104254	no	IPF vs CONTROL DOWN	unique	15.3231	15.1854	12.7549	11.7376	11.1955	15.4526	11.5568	18.8235	16.0082	18.4403	22.1141
AKT2	AKT2	AKT2	chr19:40736223-40791302	IPF	CTRL	OK	27.782	24.6924	0.170085	1.12512	0.0365512	0.93625	0.967729	no	IPF vs CONTROL UP	unique	28.0028	30.4745	21.824	27.3529	29.6516	29.3864	19.1503	26.7268	23.5304	26.983	27.0715
AKT3	AKT3	AKT3	chr1:243419306-244006886	IPF	CTRL	OK	23.3029	26.8702	-0.205502	-1.15309	0.547087	0.1902	0.359225	no	IPF vs CONTROL DOWN	unique	18.722	25.1571	31.2115	23.8775	16.6475	24.2016	24.3575	26.4199	33.1788	24.3762	26.0188
AKTIP	AKTIP	AKTIP	chr16:53468350-53537170	IPF	CTRL	OK	7.36825	6.45863	0.190093	1.14084	0.00550696	0.9922	0.99646	no	IPF vs CONTROL UP	unique	7.29629	6.40305	7.93211	7.69283	7.02898	7.85624	6.42603	7.40909	5.82417	5.83099	6.80288
ALAD	ALAD	ALAD	chr9:116148591-116163618	IPF	CTRL	OK	10.6312	14.1901	-0.416582	-1.33476	1.11648	0.01005	0.0392188	yes	IPF vs CONTROL DOWN	unique	11.7147	7.4445	14.3831	8.61959	10.3699	11.2555	12.2688	15.7644	13.4643	17.5359	11.9173
ALAS1	ALAS1	ALAS1	chr3:52232098-52248343	IPF	CTRL	OK	11.3575	15.9507	-0.489978	-1.40442	1.00374	0.01825	0.0629914	no	IPF vs CONTROL DOWN	unique	10.7423	12.9997	10.6107	7.98452	13.8262	11.9816	24.4668	13.8008	14.8627	15.6555	10.9679
ALAS2	ALAS2	ALAS2	chrX:55035487-55057497	IPF	CTRL	OK	0.665006	1.18339	-0.831491	-1.77952	1.24034	0.004	0.0187488	yes	IPF vs CONTROL DOWN	unique	0.309243	2.15611	0.565803	0.646897	0.1329	0.179083	1.70923	0.964199	0.595325	1.92298	0.725235
ALB	ALB	ALB	chr4:74269971-74287129	IPF	CTRL	NOTEST	0.241339	0.0759564	1.66781	3.17733	0	1	1	no	IPF vs CONTROL UP	unique	0	1.04127	0	0.182256	0.224505	0	0	0.135787	0	0.0689701	0.175025
ALCAM	ALCAM	ALCAM	chr3:105085556-105295757	IPF	CTRL	OK	40.8911	49.3483	-0.271216	-1.20682	0.962381	0.02635	0.0836146	no	IPF vs CONTROL DOWN	unique	33.996	30.9431	42.0607	32.0445	64.9602	41.3419	52.2885	38.359	58.0883	40.8521	57.1538
ALDH16A1	ALDH16A1	ALDH16A1	chr19:49956472-49974305	IPF	CTRL	OK	10.5514	9.72458	0.117729	1.08503	-0.16936	0.69055	0.822288	no	IPF vs CONTROL UP	unique	10.7072	11.6215	9.24956	10.8238	14.8762	6.03023	9.38455	10.9263	8.12501	11.3038	8.88324
ALDH18A1	ALDH18A1	ALDH18A1	chr10:97365685-97416567	IPF	CTRL	OK	11.7021	7.02863	0.735454	1.66492	-1.21108	0.00615	0.0263629	yes	IPF vs CONTROL UP	unique	11.7341	11.5599	13.7611	7.68068	13.8126	11.6643	5.74925	7.1803	7.61189	7.0244	7.5773
ALDH1A1	ALDH1A1	ALDH1A1	chr9:75515577-75568233	IPF	CTRL	OK	42.7766	62.6431	-0.550333	-1.46442	1.42439	0.00095	0.00574742	yes	IPF vs CONTROL DOWN	unique	37.1978	29.6894	44.2909	17.9314	85.465	42.0852	76.5661	48.8095	71.1403	53.2955	63.404
ALDH1A2	ALDH1A2	ALDH1A2	chr15:58245621-58358121	IPF	CTRL	OK	4.44288	2.9233	0.6039	1.51982	-0.431982	0.3159	0.508724	no	IPF vs CONTROL UP	unique	2.98823	3.41175	6.71933	1.84449	7.62285	4.07064	3.13876	3.93417	2.78691	3.04255	1.71409
ALDH1A3	ALDH1A3	ALDH1A3	chr15:101420008-101456830	IPF	CTRL	OK	17.8855	4.57232	1.96779	3.91168	-3.07386	5e-05	0.000459061	yes	IPF vs CONTROL UP	unique	26.2962	22.244	11.8994	8.74594	21.5125	16.6148	5.48308	2.9135	4.68266	6.30555	3.47683
ALDH1B1	ALDH1B1	ALDH1B1	chr9:38392660-38398662	IPF	CTRL	OK	11.3444	5.86197	0.952518	1.93525	-1.38462	0.0015	0.00842235	yes	IPF vs CONTROL UP	unique	11.8795	11.5935	13.5552	5.79024	5.262	19.9857	4.02009	5.78224	4.99239	7.76036	6.75475
ALDH1L1	ALDH1L1	ALDH1L1	chr3:125822403-125929011	IPF	CTRL	NOTEST	0.725945	0.352801	1.04101	2.05766	0	1	1	no	IPF vs CONTROL UP	unique	0.388101	1.41077	0.638722	0.135362	1.33316	0.449556	0.244823	0.396286	0.186797	0.553191	0.382908
ALDH1L1-AS1	ALDH1L1-AS1	ALDH1L1-AS1	chr3:125822403-125929011	IPF	CTRL	NOTEST	0.0886027	0	Inf	0	0	1	1	no	IPF vs CONTROL UP (0)	unique	0	0	0.531616	0	0	0	0	0	0	0	0
ALDH1L1-AS2	ALDH1L1-AS2	ALDH1L1-AS2	chr3:125822403-125929011	IPF	CTRL	NOTEST	0.0180638	0.0509252	-1.49528	-2.81918	0	1	1	no	IPF vs CONTROL DOWN	unique	0	0	0	0	0.108383	0	0	0	0.121439	0.133187	0
ALDH1L2	ALDH1L2	ALDH1L2	chr12:105413561-105478341	IPF	CTRL	OK	5.62671	2.51478	1.16186	2.23746	-1.63299	5e-05	0.000459061	yes	IPF vs CONTROL UP	unique	3.3037	7.95013	6.85745	4.48649	5.2536	5.90891	2.40552	2.77124	3.18133	1.60311	2.61271
ALDH2	ALDH2	ALDH2	chr12:112204690-112247789	IPF	CTRL	OK	53.234	124.172	-1.22192	-2.33257	2.94297	5e-05	0.000459061	yes	IPF vs CONTROL DOWN	unique	52.6962	45.0001	79.889	47.7346	46.1488	47.9352	191.624	107.302	90.4196	131.938	99.577
ALDH3A1	ALDH3A1	ALDH3A1	chr17:19641297-19651746	IPF	CTRL	OK	4.15542	1.37226	1.59844	3.02816	-1.43532	0.00195	0.0104494	yes	IPF vs CONTROL UP	unique	6.92832	4.84918	3.1705	2.34088	4.18488	3.45878	2.3299	1.04647	0.484321	0.975542	2.02507
ALDH3A2	ALDH3A2	ALDH3A2	chr17:19552063-19580908	IPF	CTRL	OK	35.432	37.6783	-0.0886824	-1.0634	0.450253	0.29555	0.485922	no	IPF vs CONTROL DOWN	unique	35.6964	30.43	38.0421	34.4576	34.0386	39.9272	47.1866	39.3594	34.1618	36.7206	30.9632
ALDH3B1	ALDH3B1	ALDH3B1	chr11:67776047-67796743	IPF	CTRL	OK	40.3113	48.968	-0.280656	-1.21475	0.964259	0.02555	0.0817438	no	IPF vs CONTROL DOWN	unique	29.9224	27.1379	24.9187	23.866	94.9	41.1227	45.4154	35.6072	46.7841	44.6924	72.3409
ALDH3B2	ALDH3B2	ALDH3B2	chr11:67429632-67448685	IPF	CTRL	NOTEST	1.04033	0.186653	2.47861	5.57361	0	1	1	no	IPF vs CONTROL UP	unique	0.468351	1.50146	0.803658	0	2.1122	1.3563	0.310587	0	0	0.309002	0.313674
ALDH4A1	ALDH4A1	ALDH4A1	chr1:19197923-19229293	IPF	CTRL	OK	4.99817	3.70632	0.431413	1.34855	-0.154159	0.7156	0.838733	no	IPF vs CONTROL UP	unique	6.77235	4.80603	4.12355	3.48126	4.05298	6.75285	2.90737	3.9813	3.51594	4.41678	3.7102
ALDH5A1	ALDH5A1	ALDH5A1	chr6:24495196-24537435	IPF	CTRL	OK	8.33179	6.20418	0.425386	1.34293	-0.358384	0.396	0.585955	no	IPF vs CONTROL UP	unique	9.11128	4.3645	7.98215	6.7501	10.3918	11.3909	7.10254	4.73608	5.51005	4.59955	9.07268
ALDH6A1	ALDH6A1	ALDH6A1	chr14:74486058-74551196	IPF	CTRL	OK	9.33868	12.0677	-0.369864	-1.29223	0.525667	0.17495	0.339262	no	IPF vs CONTROL DOWN	unique	5.3497	4.94522	17.4143	7.38304	10.9491	9.99071	12.7805	13.9837	11.6155	12.7749	9.18406
ALDH7A1	ALDH7A1	ALDH7A1	chr5:125877532-125931082	IPF	CTRL	OK	4.37874	3.10232	0.497169	1.41144	-0.279962	0.51145	0.687058	no	IPF vs CONTROL UP	unique	4.27415	4.38662	4.17773	3.70075	3.66765	6.06553	3.07517	3.3652	3.47794	3.01537	2.57791
ALDH8A1	ALDH8A1	ALDH8A1	chr6:135238527-135271260	IPF	CTRL	NOTEST	1.83953	0.783699	1.23097	2.34724	0	1	1	no	IPF vs CONTROL UP	unique	1.48292	1.39016	0.446438	2.2296	2.51781	2.97026	0.538842	1.01009	0.705107	0.769461	0.894995
ALDH9A1	ALDH9A1	ALDH9A1	chr1:165631448-165667900	IPF	CTRL	OK	17.392	20.1997	-0.215914	-1.16144	0.789903	0.0605	0.155632	no	IPF vs CONTROL DOWN	unique	13.4318	20.4797	22.7782	12.5487	20.3666	14.7467	20.3774	24.1585	17.3154	17.3227	21.8245
ALDOA	ALDOA	ALDOA	chr16:30064410-30081741	IPF	CTRL	OK	97.5854	123.496	-0.339722	-1.26551	1.13801	0.0091	0.0361068	yes	IPF vs CONTROL DOWN	unique	127.405	85.4038	107.512	53.7108	138.094	73.387	167.036	109.616	108.655	121.196	110.975
ALDOB	ALDOB	ALDOB	chr9:104182841-104198062	IPF	CTRL	NOTEST	0.785582	0.499903	0.652115	1.57147	0	1	1	no	IPF vs CONTROL UP	unique	0.964281	1.09792	1.10196	0.504526	0.207091	0.837715	0.402648	0.375846	0.116033	0.636225	0.968762
ALDOC	ALDOC	ALDOC	chr17:26900132-26903951	IPF	CTRL	OK	4.9953	3.37077	0.567491	1.48194	-0.373962	0.3875	0.578805	no	IPF vs CONTROL UP	unique	5.61973	6.39869	6.1939	3.03248	3.89758	4.82942	3.91646	3.01408	4.01272	2.87318	3.03743
ALG1	ALG1	ALG1	chr16:5121809-5147789	IPF	CTRL	OK	3.34329	2.32014	0.527059	1.44099	-0.433882	0.30825	0.500073	no	IPF vs CONTROL UP	unique	3.99168	3.79362	2.86213	3.6266	3.13465	2.65109	2.55542	2.30124	1.78066	2.5355	2.42788
ALG10	ALG10	ALG10	chr12:34175215-34181236	IPF	CTRL	OK	5.98782	3.4531	0.79414	1.73404	-1.03809	0.0151	0.0541548	no	IPF vs CONTROL UP	unique	5.45743	6.84562	6.5365	5.55177	5.32115	6.21447	4.03899	4.5191	3.02786	2.83062	2.84893
ALG10B	ALG10B	ALG10B	chr12:38710556-38723528	IPF	CTRL	OK	4.24388	2.79185	0.604162	1.5201	-0.765046	0.06815	0.170702	no	IPF vs CONTROL UP	unique	4.53387	3.56883	4.66625	3.79282	3.5522	5.34931	3.25329	3.22995	2.29093	2.30134	2.88374
ALG11	ALG11	ALG11	chr13:52586522-52607736	IPF	CTRL	OK	7.11613	5.66561	0.328864	1.25602	-0.189916	0.64875	0.794047	no	IPF vs CONTROL UP	unique	5.56271	7.576	6.36283	9.95497	5.98611	7.25419	6.0995	5.8243	5.18707	5.42159	5.79557
ALG12	ALG12	ALG12	chr22:50296853-50312106	IPF	CTRL	OK	13.6317	12.6476	0.108103	1.07781	-0.150051	0.7266	0.845347	no	IPF vs CONTROL UP	unique	13.4465	15.8718	13.3088	11.3594	14.9431	12.8604	11.4122	15.7709	8.66898	14.0003	13.3854
ALG13	ALG13	ALG13	chrX:110924345-111003875	IPF	CTRL	OK	41.6089	18.9233	1.13673	2.19882	-1.92043	5e-05	0.000459061	yes	IPF vs CONTROL UP	unique	42.1443	42.1726	32.4698	57.6582	35.4644	39.7442	21.6155	16.1314	23.7202	13.9	19.2492
ALG14	ALG14	ALG14	chr1:95448278-95538507	IPF	CTRL	OK	3.11795	3.2151	-0.044265	-1.03116	0.0848512	0.83885	0.916005	no	IPF vs CONTROL DOWN	unique	5.61219	1.68167	3.79213	3.69964	1.52736	2.39472	5.32691	3.68181	1.98895	2.50104	2.57679
ALG1L	ALG1L	ALG1L	chr3:125635443-125655887	IPF	CTRL	NOTEST	0.378936	0.0537546	2.81749	7.04937	0	1	1	no	IPF vs CONTROL UP	unique	7.48461e-73	3.16489e-09	0.437806	1.83581	4.09204e-20	0	3.04431e-63	0	1.72513e-10	0	0.268773
ALG1L2	ALG1L2	ALG1L2	chr3:129800673-129830276	IPF	CTRL	NOTEST	0.224944	0.0168017	3.74288	13.3881	0	1	1	no	IPF vs CONTROL UP	unique	0.651505	0	0.245015	0.453141	0	1.62618e-07	0.083962	0	4.63719e-05	3.54417e-08	2.57303e-07
ALG1L9P	ALG1L9P	ALG1L9P	chr11:71498556-71524905	IPF	CTRL	NOTEST	2.02073	1.32462	0.609294	1.52551	0	1	1	no	IPF vs CONTROL UP	unique	3.81429	1.97744	0.934441	1.50868	2.22825	1.66126	1.1165	1.23166	0.804123	0.968154	2.50267
ALG2	ALG2	ALG2	chr9:101978706-101984246	IPF	CTRL	OK	14.9163	11.1481	0.420084	1.33801	-0.41087	0.33625	0.529035	no	IPF vs CONTROL UP	unique	13.5484	13.6652	16.4054	15.605	14.4491	15.8246	13.808	12.1591	9.51127	9.40597	10.8564
ALG3	ALG3	ALG3	chr3:183948316-183967313	IPF	CTRL	OK	6.88772	5.27102	0.385945	1.30672	-0.475697	0.26465	0.45047	no	IPF vs CONTROL UP	unique	7.39312	7.1156	6.70787	5.61889	6.41735	8.0735	6.83457	5.9816	2.71681	5.95228	4.86983
ALG5	ALG5	ALG5	chr13:37523907-37573504	IPF	CTRL	OK	5.38506	6.14611	-0.19071	-1.14133	0.523495	0.2175	0.394164	no	IPF vs CONTROL DOWN	unique	5.8301	4.08649	8.43865	4.6117	6.11192	3.23151	8.15794	5.16331	2.68263	8.98197	5.74469
ALG6	ALG6	ALG6	chr1:63833260-63904233	IPF	CTRL	OK	4.13013	2.38977	0.789315	1.72825	-0.880174	0.0392	0.112406	no	IPF vs CONTROL UP	unique	3.33726	5.55345	3.75281	5.01702	3.45273	3.6675	3.42841	2.13484	1.81251	2.1669	2.40619
ALG8	ALG8	ALG8	chr11:77726760-77850699	IPF	CTRL	OK	6.45024	5.06868	0.347743	1.27257	-0.222346	0.5939	0.753708	no	IPF vs CONTROL UP	unique	4.66179	7.55363	6.8917	5.74882	6.78446	7.06105	5.81029	5.40328	4.65909	6.34643	3.12432
ALG9	ALG9	ALG9	chr11:111652918-111742305	IPF	CTRL	OK	5.95161	4.10548	0.53573	1.44968	-0.761296	0.07695	0.187233	no	IPF vs CONTROL UP	unique	6.74043	6.07506	5.75019	6.52908	5.13083	5.48406	5.16545	4.27578	3.65759	3.87752	3.55104
ALK	ALK	ALK	chr2:29415639-30144477	IPF	CTRL	NOTEST	0.995119	0.829075	0.263366	1.20028	0	1	1	no	IPF vs CONTROL UP	unique	0.860994	0.980294	0.82749	1.64568	0.816366	0.839887	0.918875	0.565353	0.436368	0.860128	1.36465
ALKBH1	ALKBH1	ALKBH1	chr14:78138748-78174356	IPF	CTRL	OK	4.30575	3.07786	0.484338	1.39894	-0.289102	0.4938	0.671627	no	IPF vs CONTROL UP	unique	3.38345	4.75122	4.19249	5.35075	3.58423	4.57235	3.53522	2.57898	3.25718	2.61902	3.39888
ALKBH2	ALKBH2	ALKBH2	chr12:109525992-109531293	IPF	CTRL	OK	4.57252	2.79073	0.712345	1.63847	-0.43396	0.28795	0.476738	no	IPF vs CONTROL UP	unique	4.9229	3.45013	3.15864	7.71973	4.68108	3.50264	2.13385	2.17077	3.55619	3.81471	2.27815
ALKBH3	ALKBH3	ALKBH3	chr11:43902356-43942494	IPF	CTRL	OK	5.15437	4.6951	0.13464	1.09782	0.00754018	0.98665	0.994462	no	IPF vs CONTROL UP	unique	5.3618	5.23288	3.50569	5.33802	4.61204	6.87581	6.69913	5.17357	2.21143	3.74376	5.64763
ALKBH4	ALKBH4	ALKBH4	chr7:102073976-102105321	IPF	CTRL	OK	5.66877	4.59598	0.302662	1.23342	-0.0508047	0.90405	0.951985	no	IPF vs CONTROL UP	unique	5.13563	4.62514	4.69491	8.25685	5.52114	5.77896	3.65159	5.58377	3.83838	4.84635	5.05983
ALKBH5	ALKBH5	ALKBH5	chr17:18086866-18113267	IPF	CTRL	OK	43.0368	41.4621	0.0537751	1.03798	0.38429	0.3587	0.551691	no	IPF vs CONTROL UP	unique	45.0933	33.1764	39.3325	36.4569	56.0126	48.1489	35.088	43.9074	39.9394	45.7616	42.6143
ALKBH6	ALKBH6	ALKBH6	chr19:36500021-36505141	IPF	CTRL	OK	4.11675	4.92533	-0.258715	-1.19641	0.409524	0.34435	0.537291	no	IPF vs CONTROL DOWN	unique	4.05588	2.93991	2.56623	7.05124	4.95571	3.13152	4.6173	6.36884	3.25066	5.19047	5.19937
ALKBH7	ALKBH7	ALKBH7	chr19:6372443-6375261	IPF	CTRL	OK	6.99279	10.5225	-0.589533	-1.50476	0.879648	0.0406	0.115307	no	IPF vs CONTROL DOWN	unique	9.38564	7.29827	8.52692	3.50778	9.261	3.97713	9.89824	9.75146	9.47149	14.2809	9.21024
ALKBH8	ALKBH8	ALKBH8	chr11:107373452-107436461	IPF	CTRL	OK	3.38964	2.44458	0.471546	1.38659	-0.384582	0.3549	0.547883	no	IPF vs CONTROL UP	unique	3.17283	2.56889	3.56367	3.93787	4.23597	2.85858	2.60701	3.00519	2.03665	2.11976	2.45427
ALLC	ALLC	ALLC	chr2:3705785-3750260	IPF	CTRL	NOTEST	0.0300412	0	Inf	0	0	1	1	no	IPF vs CONTROL UP (0)	unique	0	0	0	0	0.180247	0	0	0	0	0	0
ALMS1	ALMS1	ALMS1	chr2:73612885-73837046	IPF	CTRL	OK	31.0378	12.4308	1.3201	2.49684	-2.30093	5e-05	0.000459061	yes	IPF vs CONTROL UP	unique	20.8064	35.1373	15.5992	38.3774	43.7078	32.5986	13.112	12.6497	12.7646	9.31447	14.3134
ALMS1P	ALMS1P	ALMS1P	chr2:73872045-73912694	IPF	CTRL	OK	1.62974	0.692358	1.23505	2.35389	-1.02885	0.02455	0.079315	no	IPF vs CONTROL UP	unique	0.377029	1.93181	0.115033	2.36485	3.2429	1.74681	0.4849	0.587672	0.907108	0.597628	0.884484
ALOX12	ALOX12	ALOX12	chr17:6888441-6915653	IPF	CTRL	NOTEST	1.97387	1.71183	0.205485	1.15307	0	1	1	no	IPF vs CONTROL UP	unique	2.11117	2.26236	1.96806	2.42565	1.49365	1.58233	1.49991	1.93613	1.79319	0.917747	2.41219
ALOX12B	ALOX12B	ALOX12B	chr17:7975953-7991021	IPF	CTRL	NOTEST	0.0221455	0.242837	-3.4549	-10.9655	0	1	1	no	IPF vs CONTROL DOWN	unique	0	0.132873	0	0	0	0	0.269872	0.121298	0.112343	0.554354	0.156317
ALOX12P2	ALOX12P2	ALOX12P2	chr17:6756894-6803668	IPF	CTRL	OK	3.93488	1.68111	1.2269	2.34064	-1.32065	0.003	0.0149251	yes	IPF vs CONTROL UP	unique	2.52017	4.06502	2.23941	3.81013	5.50101	5.47353	1.29488	1.85553	2.32511	0.60955	2.3205
ALOX15	ALOX15	ALOX15	chr17:4534213-4544960	IPF	CTRL	OK	18.599	8.91478	1.06096	2.08631	-1.45957	0.0005	0.00338298	yes	IPF vs CONTROL UP	unique	7.15693	11.9762	5.15405	3.63178	69.1047	14.5706	10.7816	0.338141	2.40105	4.69263	26.3605
ALOX15B	ALOX15B	ALOX15B	chr17:7942357-7952451	IPF	CTRL	OK	2.20342	14.1396	-2.68192	-6.41711	3.68099	5e-05	0.000459061	yes	IPF vs CONTROL DOWN	unique	4.98836	0.883474	3.31008	2.93904	0.828195	0.271354	14.0642	18.7812	12.809	10.1215	14.9219
ALOX15P1	ALOX15P1	ALOX15P1	chr17:6561037-6564701	IPF	CTRL	NOTEST	0.155077	0.211569	-0.448141	-1.36428	0	1	1	no	IPF vs CONTROL DOWN	unique	0.498896	0	0	0	0.431566	0	0.386767	0	0	0	0.671076
ALOX5	ALOX5	ALOX5	chr10:45869623-45941567	IPF	CTRL	OK	26.381	35.8378	-0.441981	-1.35847	1.15653	0.00635	0.0270442	yes	IPF vs CONTROL DOWN	unique	20.8498	30.8932	27.3456	38.7013	25.253	15.2434	77.456	27.8218	22.0374	35.0428	16.8311
ALOX5AP	ALOX5AP	ALOX5AP	chr13:31287614-31338565	IPF	CTRL	OK	25.1524	34.3307	-0.448805	-1.36491	1.00814	0.01745	0.0607701	no	IPF vs CONTROL DOWN	unique	20.3951	10.8108	40.6697	35.2056	21.8418	21.9913	86.1358	21.5458	20.9669	34.2689	8.73625
ALOXE3	ALOXE3	ALOXE3	chr17:7999217-8022234	IPF	CTRL	NOTEST	0	0.0119631	#NAME?	0	0	1	1	no	IPF vs CONTROL DOWN (0)	unique	0	0	0	0	0	0	0	0	0	0	0.0598155
ALPI	ALPI	ALPI	chr2:233320832-233324742	IPF	CTRL	NOTEST	0	0.00587882	#NAME?	0	0	1	1	no	IPF vs CONTROL DOWN (0)	unique	0	0	0	0	0	0	0.0293941	0	0	0	0
ALPK1	ALPK1	ALPK1	chr4:113218498-113363764	IPF	CTRL	OK	10.7401	6.55032	0.713366	1.63962	-0.965105	0.0237	0.0771778	no	IPF vs CONTROL UP	unique	7.39112	11.8449	6.98201	14.488	13.677	10.0574	8.80619	5.79996	6.22088	5.65875	6.26583
ALPK2	ALPK2	ALPK2	chr18:56148481-56296189	IPF	CTRL	NOTEST	0.876509	0.150347	2.54347	5.8299	0	1	1	no	IPF vs CONTROL UP	unique	0.736998	2.29653	0.0708239	0.379297	0.831803	0.943602	0.119463	0.201644	0.0373535	0.0817985	0.311477
ALPK3	ALPK3	ALPK3	chr15:85359910-85416713	IPF	CTRL	OK	5.56494	9.25717	-0.734205	-1.66348	2.0295	5e-05	0.000459061	yes	IPF vs CONTROL DOWN	unique	5.26382	7.40331	4.36479	6.09269	4.73532	5.52973	8.07109	8.7997	10.2876	10.7717	8.35578
ALPL	ALPL	ALPL	chr1:21835857-21904905	IPF	CTRL	OK	13.1165	45.3444	-1.78954	-3.45705	3.85275	5e-05	0.000459061	yes	IPF vs CONTROL DOWN	unique	18.4143	13.0405	15.1251	14.5745	9.74089	7.80388	57.3222	38.7468	39.8874	48.3554	42.4104
ALPP	ALPP	ALPP	chr2:233243347-233247599	IPF	CTRL	NOTEST	0.614021	1.35996	-1.1472	-2.21484	0	1	1	no	IPF vs CONTROL DOWN	unique	0.809857	0.115261	0.925181	1.13026	0	0.70357	0.910186	1.57839	0.779673	2.24358	1.28796
ALPPL2	ALPPL2	ALPPL2	chr2:233271551-233275424	IPF	CTRL	NOTEST	0.11989	0.316412	-1.4001	-2.63919	0	1	1	no	IPF vs CONTROL DOWN	unique	0.351277	0.13332	0.0713617	0.16338	0	0	0.0902601	0.48682	0.225441	0.309011	0.470528
ALS2	ALS2	ALS2	chr2:202564985-202645895	IPF	CTRL	OK	14.9519	9.31409	0.682838	1.60529	-0.86745	0.0431	0.120443	no	IPF vs CONTROL UP	unique	14.6813	15.0102	12.8952	17.9247	13.8578	15.342	10.077	11.0335	8.10224	9.18999	8.16774
ALS2CL	ALS2CL	ALS2CL	chr3:46710484-46735194	IPF	CTRL	OK	28.2064	35.8547	-0.346141	-1.27116	1.09656	0.0112	0.0427162	yes	IPF vs CONTROL DOWN	unique	36.6509	19.3736	21.7956	46.3043	19.8248	25.289	26.8875	37.9181	37.9753	44.5604	31.9322
ALS2CR11	ALS2CR11	ALS2CR11	chr2:202352143-202483905	IPF	CTRL	NOTEST	1.38263	1.1715	0.239058	1.18022	0	1	1	no	IPF vs CONTROL UP	unique	1.5649	1.719	1.35431	1.4566	0.885415	1.31555	0.950352	1.17457	1.29197	0.819555	1.62105
ALS2CR12	ALS2CR12	ALS2CR12	chr2:202153146-202222101	IPF	CTRL	OK	6.372	1.61315	1.98187	3.95004	-1.97795	5e-05	0.000459061	yes	IPF vs CONTROL UP	unique	2.284	5.01235	1.85712	4.29782	16.4912	8.28951	2.03557	0.474702	1.0259	1.36696	3.1626
ALS2CR8	ALS2CR8	ALS2CR8	chr2:203776977-203851060	IPF	CTRL	OK	6.81385	3.91653	0.798893	1.73977	-1.08056	0.0121	0.0455072	yes	IPF vs CONTROL UP	unique	6.5695	7.81918	5.40106	5.39322	8.3543	7.34585	5.28529	2.81954	3.87332	2.90068	4.70384
ALX1	ALX1	ALX1	chr12:85674035-85695561	IPF	CTRL	NOTEST	0.0393818	0.0249874	0.656329	1.57607	0	1	1	no	IPF vs CONTROL UP	unique	0.236291	0	0	0	0	0	0	0	0	0.124937	0
ALX3	ALX3	ALX3	chr1:110602996-110613322	IPF	CTRL	OK	3.00303	2.17646	0.464436	1.37978	-0.0689328	0.8747	0.935661	no	IPF vs CONTROL UP	unique	2.04261	3.48864	1.99481	3.13109	3.33905	4.02199	1.10361	2.75914	1.76906	2.3749	2.87559
ALX4	ALX4	ALX4	chr11:44282277-44331716	IPF	CTRL	NOTEST	0.577806	0.437932	0.399877	1.3194	0	1	1	no	IPF vs CONTROL UP	unique	0.520796	0.770848	0.538968	0.436418	0.536194	0.66361	0.374328	0.487295	0.351043	0.384462	0.592533
ALYREF	ALYREF	ALYREF	chr17:79845710-79849462	IPF	CTRL	OK	12.5753	15.5414	-0.305524	-1.23587	0.90543	0.03315	0.0990512	no	IPF vs CONTROL DOWN	unique	14.1684	9.6797	15.9343	7.09968	18.0675	10.5023	17.153	16.4839	16.901	17.0923	10.0769
AMACR	AMACR	AMACR	chr5:33987090-34124633	IPF	CTRL	OK	4.80988	4.44342	0.114332	1.08247	0.159667	0.7107	0.835894	no	IPF vs CONTROL UP	unique	3.6435	4.89709	3.80987	2.78568	7.24213	6.48101	5.61355	4.74293	2.6311	4.38882	4.84068
AMBN	AMBN	AMBN	chr4:71457974-71473004	IPF	CTRL	NOTEST	0.0280083	0.00758822	1.88402	3.69103	0	1	1	no	IPF vs CONTROL UP	unique	0	0.16805	0	0	0	0	0.0379411	0	0	0	0
AMBP	AMBP	AMBP	chr9:116822407-116840752	IPF	CTRL	NOTEST	0.18575	0.163694	0.182363	1.13474	0	1	1	no	IPF vs CONTROL UP	unique	0.211226	0.721519	0	0	0.181755	0	0.1087	0	0.203259	0.223284	0.283226
AMBRA1	AMBRA1	AMBRA1	chr11:46417961-46615619	IPF	CTRL	OK	16.8374	14.5878	0.206899	1.1542	-0.119836	0.77935	0.880153	no	IPF vs CONTROL UP	unique	16.3437	18.3937	12.9216	23.434	15.2468	14.6843	15.3436	15.2985	12.5706	15.1131	14.6134
AMD1	AMD1	AMD1	chr6:111195986-111216913	IPF	CTRL	OK	29.8204	26.2577	0.18356	1.13568	0.104899	0.8053	0.896616	no	IPF vs CONTROL UP	unique	34.4116	20.9123	30.5006	23.9429	29.6278	39.5271	32.2872	27.2431	29.0828	20.5699	22.1053
AMDHD1	AMDHD1	AMDHD1	chr12:96337070-96362370	IPF	CTRL	NOTEST	0.521174	0.303359	0.780739	1.71801	0	1	1	no	IPF vs CONTROL UP	unique	0.413448	0.784583	0.252066	0.961187	0.236856	0.478902	0.247957	0.143234	0.397977	0.727626	0
AMDHD2	AMDHD2	AMDHD2	chr16:2570362-2581409	IPF	CTRL	OK	6.42189	7.45814	-0.215818	-1.16136	0.358928	0.3944	0.584443	no	IPF vs CONTROL DOWN	unique	6.62947	10.412	4.04609	8.27488	4.56173	4.60719	7.30826	9.25065	3.6457	8.70694	8.37917
AMELX	AMELX	AMELX	chrX:11155662-11683821	IPF	CTRL	NOTEST	0.0837318	0.589391	-2.81538	-7.03903	0	1	1	no	IPF vs CONTROL DOWN	unique	0	0.502391	0	0	0	0	0.113912	0.458037	0.424142	0.468005	1.48286
AMELY	AMELY	AMELY	chrY:6733958-6742068	IPF	CTRL	NOTEST	0	0	0	1	0	1	1	no	IPF vs. CONTROL EQUAL(0)	unique	0	0	0	0	0	0	0	0	0	0	0
AMER1	AMER1	AMER1	chrX:63404996-63425624	IPF	CTRL	OK	4.00174	3.34099	0.260352	1.19777	-0.0169364	0.9691	0.985163	no	IPF vs CONTROL UP	unique	4.65188	3.92469	3.80856	3.78705	3.18612	4.65214	2.37903	3.23599	2.67498	3.51079	4.90416
AMER2	AMER2	AMER2	chr13:25742671-25745857	IPF	CTRL	NOTEST	0.0624415	0.416758	-2.73863	-6.67438	0	1	1	no	IPF vs CONTROL DOWN	unique	0	0	0	0.286504	0.0881449	0	0	0.320086	0.395282	1.29969	0.068732
AMER3	AMER3	AMER3	chr2:131513076-131525707	IPF	CTRL	NOTEST	0	0.00615438	#NAME?	0	0	1	1	no	IPF vs CONTROL DOWN (0)	unique	0	0	0	0	0	0	0	0	0	0	0.0307719
AMFR	AMFR	AMFR	chr16:56395363-56459450	IPF	CTRL	OK	25.6176	30.1508	-0.23506	-1.17696	0.84688	0.04755	0.129907	no	IPF vs CONTROL DOWN	unique	28.9422	24.305	26.8793	16.1844	30.8151	26.5796	36.7726	33.1615	24.479	35.6804	20.6604
AMH	AMH	AMH	chr19:2249112-2252072	IPF	CTRL	NOTEST	1.5831	1.60011	-0.0154146	-1.01074	0	1	1	no	IPF vs CONTROL DOWN	unique	1.46354	1.16647	1.24936	3.47006	1.13206	1.01713	1.05341	2.43365	0.986104	1.46832	2.05906
AMHR2	AMHR2	AMHR2	chr12:53817638-53825318	IPF	CTRL	NOTEST	0.260204	0.197954	0.394476	1.31446	0	1	1	no	IPF vs CONTROL UP	unique	0.380623	0.650081	0	0.530519	0	0	0.195817	0	0.183146	0.100554	0.510254
AMICA1	AMICA1	AMICA1	chr11:118064441-118095809	IPF	CTRL	OK	10.7177	16.416	-0.615105	-1.53167	1.07638	0.0132	0.0487367	yes	IPF vs CONTROL DOWN	unique	9.22088	9.6627	9.49665	19.3988	11.5638	4.96361	31.5348	11.9406	13.1321	16.8036	8.66907
AMIGO1	AMIGO1	AMIGO1	chr1:110049445-110052336	IPF	CTRL	OK	3.16105	5.17461	-0.711047	-1.63699	1.30492	0.0021	0.0111001	yes	IPF vs CONTROL DOWN	unique	1.18235	4.03861	3.67502	3.29942	3.7579	3.013	2.5216	6.75905	4.43897	6.92708	5.22637
AMIGO2	AMIGO2	AMIGO2	chr12:47469489-47473734	IPF	CTRL	OK	10.4327	12.3183	-0.23968	-1.18073	0.957596	0.0243	0.0788267	no	IPF vs CONTROL DOWN	unique	9.18935	10.8848	9.9415	12.8034	8.70279	11.0746	14.7813	10.9407	9.1129	15.284	11.4724
AMIGO3	AMIGO3	AMIGO3	chr3:49726949-49761384	IPF	CTRL	OK	10.2654	6.93323	0.566184	1.4806	-0.374199	0.38075	0.572902	no	IPF vs CONTROL UP	unique	11.7017	12.213	9.08965	12.2491	8.20592	8.13276	6.43754	5.87903	6.47779	6.53462	9.33717
AMMECR1	AMMECR1	AMMECR1	chrX:109437413-109699562	IPF	CTRL	OK	5.64546	4.49128	0.329963	1.25698	-0.117795	0.7856	0.884236	no	IPF vs CONTROL UP	unique	7.19229	4.9681	5.56754	5.32324	5.3418	5.47978	5.36405	4.46492	4.34226	4.04649	4.23869
AMMECR1L	AMMECR1L	AMMECR1L	chr2:128619206-128643514	IPF	CTRL	OK	14.6711	10.6643	0.460186	1.37572	-0.373875	0.38345	0.574909	no	IPF vs CONTROL UP	unique	14.4558	15.3383	12.0232	19.8432	11.8242	14.5418	10.5478	12.7116	11.0084	10.2838	8.76992
AMN	AMN	AMN	chr14:103388992-103397179	IPF	CTRL	OK	1.86609	0.817453	1.19081	2.28281	-0.73811	0.09385	0.216266	no	IPF vs CONTROL UP	unique	1.93084	1.53894	1.41397	2.42202	2.32525	1.56551	0.546358	2.207	0	0.816209	0.517698
AMN1	AMN1	AMN1	chr12:31824070-31882108	IPF	CTRL	OK	4.75986	3.13661	0.601712	1.51752	-0.394693	0.3532	0.546652	no	IPF vs CONTROL UP	unique	5.35873	5.08675	4.64294	5.70415	3.02965	4.73694	2.93609	4.39683	2.44326	2.9783	2.92858
AMOT	AMOT	AMOT	chrX:112018104-112084043	IPF	CTRL	OK	4.08859	4.58882	-0.16652	-1.12235	0.692333	0.10515	0.234321	no	IPF vs CONTROL DOWN	unique	3.22769	2.46233	3.70613	2.84996	6.25673	6.02868	3.65427	5.36014	4.22726	5.20592	4.49649
AMOTL1	AMOTL1	AMOTL1	chr11:94501507-94609918	IPF	CTRL	OK	20.9491	37.6635	-0.84628	-1.79786	2.18146	5e-05	0.000459061	yes	IPF vs CONTROL DOWN	unique	21.3962	19.36	28.4464	18.1016	14.3682	24.0221	29.9252	40.8385	34.6535	42.3862	40.5141
AMOTL2	AMOTL2	AMOTL2	chr3:134074189-134093406	IPF	CTRL	OK	24.2721	54.3791	-1.16376	-2.2404	2.83258	5e-05	0.000459061	yes	IPF vs CONTROL DOWN	unique	27.0713	16.2258	25.3319	32.7705	22.8849	21.3479	39.5681	53.3127	67.0694	61.4192	50.5259
AMPD1	AMPD1	AMPD1	chr1:115215719-115238239	IPF	CTRL	OK	2.78152	0.408866	2.76618	6.80303	-2.36994	0.0098	0.0383816	yes	IPF vs CONTROL UP	unique	1.09979	3.7572	4.24634	1.70497	2.62483	3.25602	1.06782	0.507889	0	0.386969	0.0816515
AMPD2	AMPD2	AMPD2	chr1:110162434-110174677	IPF	CTRL	OK	15.5917	10.8687	0.520597	1.43455	-0.611805	0.15725	0.314106	no	IPF vs CONTROL UP	unique	17.8789	17.8687	10.6405	16.9487	17.2449	12.9686	11.1771	10.0845	9.39056	15.8762	7.81527
AMPD3	AMPD3	AMPD3	chr11:10471867-10529126	IPF	CTRL	OK	16.6195	4.35535	1.93202	3.81588	-3.04653	5e-05	0.000459061	yes	IPF vs CONTROL UP	unique	13.7012	13.4563	6.55972	17.5276	29.1748	19.2974	5.84668	3.1872	3.97776	3.74478	5.02032
AMPH	AMPH	AMPH	chr7:38423296-38671167	IPF	CTRL	NOTEST	1.47609	0.413137	1.83709	3.57287	0	1	1	no	IPF vs CONTROL UP	unique	1.22466	1.79277	1.43869	1.22108	1.05141	2.1279	0.426873	0.545598	0.243059	0.323056	0.527097
AMT	AMT	AMT	chr3:49454210-49466757	IPF	CTRL	OK	28.8973	16.8296	0.779932	1.71705	-0.824884	0.06295	0.160463	no	IPF vs CONTROL UP	unique	27.667	27.91	19.4535	47.5488	19.2149	31.5894	10.7936	21.2045	19.3104	17.7241	15.1154
AMTN	AMTN	AMTN	chr4:71384297-71398459	IPF	CTRL	NOTEST	0.239717	0	Inf	0	0	1	1	no	IPF vs CONTROL UP (0)	unique	0	1.4383	0	0	0	0	0	0	0	0	0
AMY1A	AMY1A,AMY1B,AMY1C	AMY1A,AMY1B,AMY1C	chr1:104292278-104301311	IPF	CTRL	NOTEST	0.0186868	0.033891	-0.858885	-1.81364	0	1	1	no	IPF vs CONTROL DOWN	multiple	0.111062	0	0	0	0.00105872	0	0.028464	0	0	0.0292442	0.111747
AMY1B	AMY1B	AMY1B	chr1:104292278-104301311	IPF	CTRL	NOTEST	0.022766	0.000109305	7.70238	208.28	0	1	1	no	IPF vs CONTROL UP	multiple	0.000322401	0	0	0	0.136273	0	0.000159962	0	0	0.000156447	0.000230116
AMY1C	AMY1C	AMY1C	chr1:104292278-104301311	IPF	CTRL	NOTEST	0.000269766	1.33589e-05	4.33583	20.1936	0	1	1	no	IPF vs CONTROL UP	multiple	3.56373e-05	0	0	0	0.00158296	0	2.26745e-05	0	0	2.17858e-05	2.23345e-05
AMY2A	AMY2A	AMY2A	chr1:104159998-104168400	IPF	CTRL	NOTEST	0.0186655	0.0547242	-1.55181	-2.93184	0	1	1	no	IPF vs CONTROL DOWN	unique	0	0	0.111993	0	0	0	0	0	0.176647	0.0969742	0
AMY2B	AMY2B	AMY2B	chr1:104068577-104122149	IPF	CTRL	OK	16.037	9.79331	0.711535	1.63755	-0.751759	0.0802	0.193033	no	IPF vs CONTROL UP	unique	10.7958	13.0603	10.9418	22.2128	19.8286	19.3826	9.60738	15.7085	7.01455	9.40433	7.23178
AMZ1	AMZ1	AMZ1	chr7:2719162-2755069	IPF	CTRL	NOTEST	1.47478	1.4927	-0.0174169	-1.01215	0	1	1	no	IPF vs CONTROL DOWN	unique	1.68489	1.18053	0.868088	2.44324	0.945415	1.72654	2.62884	2.02107	1.12316	0.64937	1.04104
AMZ2	AMZ2	AMZ2	chr17:66244144-66253305	IPF	CTRL	OK	16.3389	11.5087	0.505582	1.4197	-0.603662	0.15485	0.310664	no	IPF vs CONTROL UP	unique	12.5545	12.8658	17.666	15.7578	24.3308	14.8583	13.0092	10.1417	14.0212	9.30756	11.0639
AMZ2P1	AMZ2P1	AMZ2P1	chr17:62962667-62971703	IPF	CTRL	OK	3.04331	2.19445	0.471785	1.38682	-0.433441	0.30555	0.49713	no	IPF vs CONTROL UP	unique	3.18234	3.81403	2.44844	3.50724	2.30058	3.00723	2.00021	2.5246	2.41891	1.28121	2.7473
ANAPC1	ANAPC1	ANAPC1	chr2:112525213-112641741	IPF	CTRL	OK	4.57696	3.01494	0.602259	1.51809	-0.910973	0.0311	0.0945103	no	IPF vs CONTROL UP	unique	4.35192	5.07983	3.85043	5.41529	4.48559	4.27871	3.84808	3.00377	2.21869	3.23893	2.76525
ANAPC10	ANAPC10	ANAPC10	chr4:145915726-146050676	IPF	CTRL	OK	2.68818	2.23339	0.267398	1.20363	-0.0411459	0.92605	0.963049	no	IPF vs CONTROL UP	unique	2.21209	1.71112	3.84699	4.04675	2.85599	1.45616	2.28886	2.35505	1.69634	1.90545	2.92124
ANAPC11	ANAPC11	ANAPC11	chr17:79849598-79858363	IPF	CTRL	OK	13.7736	18.3936	-0.417304	-1.33543	0.990082	0.02185	0.072351	no	IPF vs CONTROL DOWN	unique	14.4313	16.8433	10.7301	8.46586	18.3611	13.8097	16.6077	18.5077	18.7097	21.9156	16.2274
ANAPC13	ANAPC13	ANAPC13	chr3:134196545-134293855	IPF	CTRL	OK	20.9528	19.0414	0.137999	1.10038	0.124953	0.7735	0.876028	no	IPF vs CONTROL UP	unique	14.5196	13.9124	31.7808	19.4817	23.9072	22.1148	20.7814	22.6473	16.6937	16.9657	18.119
ANAPC15	ANAPC15	ANAPC15	chr11:71709957-71823822	IPF	CTRL	OK	2.85526	5.83541	-1.03121	-2.04374	0.160767	0.373	0.565567	no	IPF vs CONTROL DOWN	unique	4.30212	3.36179	4.28098	1.61372	1.10066	2.47231	7.2636	6.2604	5.5371	4.24624	5.8697
ANAPC16	ANAPC16	ANAPC16	chr10:73855789-73995618	IPF	CTRL	OK	26.3242	25.4911	0.0463965	1.03268	0.387024	0.3721	0.564485	no	IPF vs CONTROL UP	unique	25.7151	20.6468	28.542	27.8595	24.5669	30.6147	21.985	30.116	25.9425	22.8007	26.6111
ANAPC1P1	ANAPC1P1	ANAPC1P1	chr2:87042459-87122165	IPF	CTRL	NOTEST	0.231146	0.0813192	1.50714	2.84246	0	1	1	no	IPF vs CONTROL UP	unique	0.168159	0	0.205151	0.234459	0	0.779109	0.0432411	0	0.161846	0.0888229	0.112686
ANAPC2	ANAPC2	ANAPC2	chr9:140069235-140084822	IPF	CTRL	OK	14.1475	14.2381	-0.00921153	-1.00641	0.227487	0.60075	0.759346	no	IPF vs CONTROL DOWN	unique	14.5486	20.0005	9.91589	17.2948	13.5132	9.61201	12.4868	15.9064	13.9023	16.2656	12.6295
ANAPC4	ANAPC4	ANAPC4	chr4:25378847-25420120	IPF	CTRL	OK	15.4626	7.38443	1.06623	2.09395	-1.77755	0.00015	0.00122565	yes	IPF vs CONTROL UP	unique	10.0231	17.7385	9.82543	15.0512	21.3341	18.8034	10.7763	6.4548	5.66368	6.43956	7.58779
ANAPC5	ANAPC5	ANAPC5	chr12:121746047-121792012	IPF	CTRL	OK	36.0685	23.0122	0.64834	1.56736	-0.981526	0.02325	0.0760558	no	IPF vs CONTROL UP	unique	31.6511	48.5301	28.7869	37.6341	41.6543	28.1543	25.9732	23.5335	18.1636	26.3562	21.0344
ANAPC7	ANAPC7	ANAPC7	chr12:110810704-110841535	IPF	CTRL	OK	17.5482	9.91616	0.82347	1.76966	-1.20838	0.006	0.0258368	yes	IPF vs CONTROL UP	unique	15.0112	18.9392	11.8773	22.5132	17.537	19.4114	11.7626	10.3064	8.32908	9.15544	10.0273
ANG	ANG	ANG	chr14:21152335-21168758	IPF	CTRL	OK	5.55564	8.38569	-0.593976	-1.5094	0.498066	0.2444	0.426349	no	IPF vs CONTROL DOWN	unique	4.60983	3.53387	7.08025	3.69397	9.57686	4.83907	10.6361	9.82982	5.11456	9.2173	7.13067
ANGEL1	ANGEL1	ANGEL1	chr14:77253585-77279283	IPF	CTRL	OK	20.7261	14.7188	0.493791	1.40814	-0.659666	0.11865	0.25568	no	IPF vs CONTROL UP	unique	20.501	24.5328	17.1974	23.7569	14.7822	23.5862	14.5387	17.4703	12.1526	17.2493	12.1829
ANGEL2	ANGEL2	ANGEL2	chr1:213165523-213189168	IPF	CTRL	OK	13.8949	8.39439	0.727054	1.65526	-1.00314	0.01755	0.0610482	no	IPF vs CONTROL UP	unique	12.2306	13.0857	11.6004	20.0833	12.1303	14.2389	8.64695	9.90362	7.39746	7.71419	8.30974
ANGPT1	ANGPT1	ANGPT1	chr8:108261709-108510254	IPF	CTRL	OK	8.29205	21.101	-1.34751	-2.54473	2.97696	5e-05	0.000459061	yes	IPF vs CONTROL DOWN	unique	8.91112	9.99205	13.0178	8.66097	3.51215	5.65819	17.4567	21.5471	27.1999	15.9759	23.3255
ANGPT2	ANGPT2	ANGPT2	chr8:6264112-6501140	IPF	CTRL	OK	6.15365	2.84615	1.11243	2.1621	-1.01796	0.0235	0.0766584	no	IPF vs CONTROL UP	unique	7.08396	7.74809	5.43576	4.20651	5.79244	6.65517	3.41825	1.73965	3.33659	1.85306	3.8832
ANGPT4	ANGPT4	ANGPT4	chr20:853296-896960	IPF	CTRL	NOTEST	0.452624	0.666149	-0.55753	-1.47175	0	1	1	no	IPF vs CONTROL DOWN	unique	0.616826	0	0.470208	0.430098	0.662762	0.535852	1.90296	0.48078	0.148426	0.488616	0.309961
ANGPTL1	ANGPTL1	ANGPTL1	chr1:178694299-178889237	IPF	CTRL	OK	9.60848	5.19141	0.888183	1.85084	-0.795208	0.05975	0.154069	no	IPF vs CONTROL UP	unique	8.44568	9.52358	11.6235	8.61616	10.3173	9.12466	6.19402	4.13651	5.23862	4.02693	6.36095
ANGPTL2	ANGPTL2	ANGPTL2	chr9:129677052-129985445	IPF	CTRL	OK	22.1996	18.9887	0.225388	1.16909	-0.0591131	0.89315	0.945912	no	IPF vs CONTROL UP	unique	31.675	26.3371	25.0355	13.8399	14.1833	22.1267	10.6389	17.6784	19.1674	18.5375	28.9215
ANGPTL3	ANGPTL3	ANGPTL3	chr1:62920396-63154039	IPF	CTRL	NOTEST	1.41057	0.564854	1.32032	2.49722	0	1	1	no	IPF vs CONTROL UP	unique	1.80051	1.26157	1.26661	1.73872	0.952142	1.44384	0.711977	0.431837	0.53327	0.219374	0.927812
ANGPTL4	ANGPTL4	ANGPTL4	chr19:8429010-8439257	IPF	CTRL	OK	3.44294	7.3594	-1.09595	-2.13753	1.56133	0.0002	0.00156984	yes	IPF vs CONTROL DOWN	unique	4.66169	6.25053	2.03176	2.78333	3.00351	1.92682	3.32402	5.35913	18.8928	5.54242	3.67862
ANGPTL5	ANGPTL5	ANGPTL5	chr11:101761404-101871793	IPF	CTRL	NOTEST	1.00739	0.371724	1.43831	2.71004	0	1	1	no	IPF vs CONTROL UP	unique	0.370907	1.26693	0.527507	1.37995	0.63729	1.86173	0.603651	0.128503	0.238033	0.391573	0.496858
ANGPTL6	ANGPTL6	ANGPTL6	chr19:10196805-10213425	IPF	CTRL	NOTEST	0.742404	0.706619	0.0712724	1.05064	0	1	1	no	IPF vs CONTROL UP	unique	0.475557	0.734108	0.602072	1.37686	0.432758	0.833069	0.411114	1.38993	0.44093	0.500448	0.790672
ANGPTL7	ANGPTL7	ANGPTL7	chr1:11166587-11322608	IPF	CTRL	OK	3.07188	2.22061	0.468167	1.38335	-0.0555087	0.912	0.956123	no	IPF vs CONTROL UP	unique	3.0176	3.13705	2.71929	2.56237	3.04369	3.95126	2.19172	1.90906	2.39959	2.49346	2.1092
ANHX	ANHX	ANHX	chr12:133794897-133812422	IPF	CTRL	NOTEST	0	0	0	1	0	1	1	no	IPF vs. CONTROL EQUAL(0)	unique	0	0	0	0	0	0	0	0	0	0	0
ANK1	ANK1	ANK1	chr8:41510743-41754280	IPF	CTRL	NOTEST	0.612999	0.31008	0.983241	1.9769	0	1	1	no	IPF vs CONTROL UP	unique	0.346531	0.481939	0.284907	0.905632	1.11749	0.541492	0.246295	0.352484	0.179595	0.583723	0.188305
ANK2	ANK2	ANK2	chr4:113739238-114304896	IPF	CTRL	OK	10.2751	5.54457	0.890003	1.85318	-1.13904	0.00825	0.0332303	yes	IPF vs CONTROL UP	unique	8.88548	12.3636	11.8104	8.45699	9.0085	11.1256	5.2906	4.01188	8.59904	4.8471	4.97425
ANK3	ANK3	ANK3	chr10:61786055-62493284	IPF	CTRL	OK	13.6983	15.278	-0.157454	-1.11532	0.456109	0.28835	0.477244	no	IPF vs CONTROL DOWN	unique	12.6584	10.6677	13.5234	15.264	18.4817	11.5949	21.3694	14.3577	12.9213	9.81051	17.9311
ANKAR	ANKAR	ANKAR	chr2:190540710-190611376	IPF	CTRL	OK	5.03239	2.60254	0.951324	1.93365	-1.0826	0.0128	0.0475146	yes	IPF vs CONTROL UP	unique	3.88731	4.5735	3.82659	7.78036	3.44718	6.67939	3.29361	2.82885	1.99627	2.1185	2.77546
ANKDD1A	ANKDD1A	ANKDD1A	chr15:65204100-65251041	IPF	CTRL	OK	6.84258	4.09613	0.74028	1.6705	-0.717967	0.09285	0.21491	no	IPF vs CONTROL UP	unique	6.13546	9.84349	5.26672	8.82339	4.31017	6.67628	2.86533	3.28549	5.54899	4.61053	4.17031
ANKDD1B	ANKDD1B	ANKDD1B	chr5:74916139-74966865	IPF	CTRL	OK	1.13314	0.40245	1.49344	2.8156	-1.46213	0.0039	0.018371	yes	IPF vs CONTROL UP	unique	0.655532	0.497603	0.133406	0.608876	3.38488	1.51854	0.337385	0.227036	0.630787	0.23101	0.586034
ANKEF1	ANKEF1	ANKEF1	chr20:10004459-10288066	IPF	CTRL	OK	2.43487	1.57134	0.631853	1.54955	-0.411509	0.33065	0.52319	no	IPF vs CONTROL UP	unique	2.59973	1.13173	2.09553	1.4945	5.25062	2.03713	1.90532	0.874321	1.91413	1.37136	1.79156
ANKFN1	ANKFN1	ANKFN1	chr17:54230835-54560007	IPF	CTRL	OK	5.47958	0.606347	3.17585	9.03705	-2.81429	5e-05	0.000459061	yes	IPF vs CONTROL UP	unique	1.56696	2.60756	1.54275	2.0181	17.6027	7.53943	0.805295	0.125282	0.232066	0.25449	1.6146
ANKFY1	ANKFY1	ANKFY1	chr17:4066664-4167274	IPF	CTRL	OK	24.1613	19.0588	0.342243	1.26773	-0.365247	0.3987	0.588914	no	IPF vs CONTROL UP	unique	25.9023	23.585	20.2615	28.3428	22.6747	24.2017	20.298	20.1703	15.8423	18.9829	20.0005
ANKH	ANKH	ANKH	chr5:14704908-14871887	IPF	CTRL	OK	20.5084	13.0162	0.655901	1.5756	-0.849205	0.04685	0.128412	no	IPF vs CONTROL UP	unique	22.8404	22.7777	19.3476	18.7853	14.6073	24.6918	12.7125	11.5368	12.9356	12.0905	15.8057
ANKHD1	ANKHD1	ANKHD1	chr5:139781398-139929163	IPF	CTRL	OK	47.5404	30.0799	0.660354	1.58047	-0.432666	0.30935	0.501589	no	IPF vs CONTROL UP	unique	37.9281	47.2833	30.825	67.1682	50.6096	51.4283	30.6483	33.0798	32.4212	30.0222	24.2281
ANKHD1-EIF4EBP3	ANKHD1-EIF4EBP3	ANKHD1-EIF4EBP3	chr5:139781398-139929163	IPF	CTRL	OK	10.2534	13.268	-0.371845	-1.29401	0.187833	0.65505	0.798076	no	IPF vs CONTROL DOWN	unique	10.8613	13.7387	12.686	12.124	8.45302	3.65752	10.5635	19.6989	13.6572	8.71557	13.7048
ANKIB1	ANKIB1	ANKIB1	chr7:91875547-92030698	IPF	CTRL	OK	14.671	11.3065	0.375822	1.29758	-0.463051	0.2732	0.460317	no	IPF vs CONTROL UP	unique	13.1262	17.1256	12.9091	16.7682	13.8657	14.2313	12.23	11.8499	11.1106	10.3691	10.9727
ANKK1	ANKK1	ANKK1	chr11:113258512-113271140	IPF	CTRL	OK	3.71521	0.968762	1.93923	3.83501	-1.82104	5e-05	0.000459061	yes	IPF vs CONTROL UP	unique	1.14731	4.83336	0.629278	3.68209	8.27811	3.72111	1.03176	0.238503	1.43583	0.908306	1.22941
ANKLE1	ANKLE1	ANKLE1	chr19:17392453-17398454	IPF	CTRL	NOTEST	0.700063	0.475409	0.558316	1.47255	0	1	1	no	IPF vs CONTROL UP	unique	0.718533	0.818106	0.656551	1.12835	0.46268	0.416157	0.322964	0.93364	0.345893	0.473867	0.300679
ANKLE2	ANKLE2	ANKLE2	chr12:133302253-133338451	IPF	CTRL	OK	25.1401	20.1869	0.316577	1.24537	-0.270812	0.5174	0.691861	no	IPF vs CONTROL UP	unique	23.3551	33.2392	14.6894	33.8671	24.0619	21.6282	18.7632	21.1447	22.1792	19.2204	19.6268
ANKMY1	ANKMY1	ANKMY1	chr2:241418838-241497405	IPF	CTRL	OK	18.1429	7.45112	1.28388	2.43492	-1.83507	5e-05	0.000459061	yes	IPF vs CONTROL UP	unique	11.7276	20.28	6.56606	15.8488	34.8955	19.5395	6.28349	6.38461	7.35702	6.04959	11.1809
ANKMY2	ANKMY2	ANKMY2	chr7:16639400-16685442	IPF	CTRL	OK	9.07166	5.71859	0.665708	1.58635	-0.703329	0.09735	0.221901	no	IPF vs CONTROL UP	unique	7.19253	9.09924	8.14033	8.92109	10.1006	10.9762	9.56282	4.15331	4.61606	5.06148	5.19927
ANKRA2	ANKRA2	ANKRA2	chr5:72848024-72861511	IPF	CTRL	OK	8.35882	5.47473	0.610511	1.5268	-0.523228	0.2203	0.397443	no	IPF vs CONTROL UP	unique	5.21498	11.1142	6.27684	9.32658	8.6173	9.603	6.52972	5.55907	5.6635	5.85933	3.76203
ANKRD1	ANKRD1	ANKRD1	chr10:92671856-92681032	IPF	CTRL	OK	0.253325	22.988	-6.50374	-90.7449	5.00444	5e-05	0.000459061	yes	IPF vs CONTROL DOWN	unique	0.449443	0.341157	0.182712	0.417874	0.128767	0	9.89791	11.833	52.2007	36.3912	4.61714
ANKRD10	ANKRD10	ANKRD10	chr13:111530886-111567416	IPF	CTRL	OK	84.7055	39.4403	1.10279	2.14769	-1.93113	5e-05	0.000459061	yes	IPF vs CONTROL UP	unique	75.961	109.41	56.7087	105.826	73.6953	86.6322	40.209	41.484	36.9569	43.1198	35.4316
ANKRD11	ANKRD11	ANKRD11	chr16:89334028-89556969	IPF	CTRL	OK	23.9843	23.2349	0.0457961	1.03225	0.240545	0.5672	0.733212	no	IPF vs CONTROL UP	unique	20.5694	30.3122	18.3725	30.8577	24.8673	18.9265	20.8669	24.1864	22.1188	21.4323	27.57
ANKRD12	ANKRD12	ANKRD12	chr18:9136750-9285983	IPF	CTRL	OK	19.5355	14.8547	0.395178	1.31511	-0.403849	0.35035	0.543184	no	IPF vs CONTROL UP	unique	16.4437	19.6073	20.6683	24.357	17.5134	18.6231	16.508	12.8588	16.1863	10.538	18.1823
ANKRD13A	ANKRD13A	ANKRD13A	chr12:110437234-110477235	IPF	CTRL	OK	29.1817	23.788	0.294828	1.22674	-0.174387	0.6796	0.814756	no	IPF vs CONTROL UP	unique	28.2827	28.0199	23.8002	37.7447	26.6082	30.6344	27.5786	21.1538	23.9782	23.5591	22.6704
ANKRD13B	ANKRD13B	ANKRD13B	chr17:27920526-27948441	IPF	CTRL	OK	2.88673	1.8001	0.681357	1.60365	-0.433123	0.3004	0.491125	no	IPF vs CONTROL UP	unique	2.45992	4.56429	1.49852	3.17931	2.34672	3.2716	0.912642	1.5153	2.01747	2.11504	2.44005
ANKRD13C	ANKRD13C	ANKRD13C	chr1:70724684-70820417	IPF	CTRL	OK	7.8981	7.033	0.167366	1.12301	0.159254	0.71115	0.83617	no	IPF vs CONTROL UP	unique	7.17785	6.91514	8.21945	10.586	5.94286	8.5473	6.86752	7.30586	7.25016	6.85494	6.88651
ANKRD13D	ANKRD13D	ANKRD13D	chr11:67056761-67069955	IPF	CTRL	OK	14.7606	10.7331	0.459675	1.37523	-0.573014	0.17745	0.342838	no	IPF vs CONTROL UP	unique	17.3305	17.8531	8.38364	14.0057	17.6108	13.3796	12.7359	10.4355	7.52931	10.8915	12.0735
ANKRD16	ANKRD16	ANKRD16	chr10:5903688-5979558	IPF	CTRL	OK	5.10176	3.58874	0.507516	1.4216	-0.223878	0.7142	0.838	no	IPF vs CONTROL UP	unique	7.34508	4.47457	3.79164	4.4639	4.86064	5.67472	3.19724	3.13045	2.16913	4.77774	4.66915
ANKRD17	ANKRD17	ANKRD17	chr4:73940501-74124502	IPF	CTRL	OK	31.1342	24.4149	0.350741	1.27522	-0.303333	0.47945	0.66023	no	IPF vs CONTROL UP	unique	29.5225	31.7688	28.6164	37.5252	27.675	31.6973	24.2524	24.747	26.1164	22.0277	24.9308
ANKRD18A	ANKRD18A	ANKRD18A	chr9:38571360-38620360	IPF	CTRL	OK	5.24338	1.15865	2.17805	4.5254	-2.60502	5e-05	0.000459061	yes	IPF vs CONTROL UP	unique	1.61505	7.0927	1.9672	3.43591	11.0243	6.32512	1.61945	0.399741	0.962627	0.649087	2.16237
ANKRD18B	ANKRD18B	ANKRD18B	chr9:33524410-33573001	IPF	CTRL	OK	2.2725	0.301757	2.91282	7.53088	-2.49049	5e-05	0.000459061	yes	IPF vs CONTROL UP	unique	1.60839	3.13932	0.839606	0.32079	4.79914	2.92773	0.767046	0	0.221229	0.161602	0.358908
ANKRD18DP	ANKRD18DP	ANKRD18DP	chr3:197784403-197807542	IPF	CTRL	NOTEST	0.126206	0.0587385	1.1034	2.1486	0	1	1	no	IPF vs CONTROL UP	unique	0.100213	0.114101	0.0610568	0.279726	0.0860559	0.116081	0.0772295	0	0.0964786	0.05288	0.0671043
ANKRD19P	ANKRD19P	ANKRD19P	chr9:95571892-95600739	IPF	CTRL	OK	3.14927	2.46713	0.352182	1.27649	-0.0503239	0.9071	0.95362	no	IPF vs CONTROL UP	unique	3.43098	4.48523	3.64053	3.01377	1.52845	2.79665	2.18796	2.24527	2.44648	2.81737	2.63858
ANKRD2	ANKRD2	ANKRD2	chr10:99332255-99343641	IPF	CTRL	NOTEST	0.080938	0.226211	-1.48278	-2.79487	0	1	1	no	IPF vs CONTROL DOWN	unique	0.22501	0	0	0	0	0.260618	0.289573	0	0	0.237918	0.603563
ANKRD20A1	ANKRD20A1,ANKRD20A3	ANKRD20A1,ANKRD20A3	chr9:67926760-67970293	IPF	CTRL	NOTEST	0.160768	0.132901	0.27463	1.20968	0	1	1	no	IPF vs CONTROL UP	unique	0	0.373594	0.0999073	0.114461	0.281673	0.0949701	0.084266	0.0852313	0.078941	0.0865343	0.32953
ANKRD20A11P	ANKRD20A11P	ANKRD20A11P	chr21:15316095-15352765	IPF	CTRL	OK	2.43234	1.49978	0.697592	1.6218	-0.402284	0.34045	0.533073	no	IPF vs CONTROL UP	unique	2.85691	0.650605	0.873132	4.37411	4.18484	1.65443	0.367962	1.7806	1.64898	1.20934	2.49202
ANKRD20A12P	ANKRD20A12P	ANKRD20A12P	chr1:142697420-142713605	IPF	CTRL	OK	2.5931	1.97511	0.392745	1.31289	-0.180559	0.67295	0.8105	no	IPF vs CONTROL UP	unique	2.90604	3.50348	2.71125	2.14498	1.32286	2.97002	0.835219	1.95408	2.13881	1.62535	3.32211
ANKRD20A19P	ANKRD20A19P	ANKRD20A19P	chr13:24481422-24523454	IPF	CTRL	NOTEST	0.0106165	0.0103614	0.0350888	1.02462	0	1	1	no	IPF vs CONTROL UP	unique	0	0.0636991	0	0	0	0	0.0143624	0	0	0	0.0374447
ANKRD20A2	ANKRD20A2,ANKRD20A3	ANKRD20A2,ANKRD20A3	chr9:43089971-43133544	IPF	CTRL	NOTEST	0.0204046	0.0533991	-1.38792	-2.61702	0	1	1	no	IPF vs CONTROL DOWN	multiple	0	0	0.0749415	0	0	0.0474859	0.0105276	0.0426149	0	0.0216256	0.192227
ANKRD20A3	ANKRD20A3	ANKRD20A3	chr9:67926760-67970293	IPF	CTRL	NOTEST	1.93922e-05	1.96838e-05	-0.0215347	-1.01504	0	1	1	no	IPF vs CONTROL DOWN	multiple	0	1.87866e-05	2.04115e-05	2.25527e-05	1.50578e-05	3.95446e-05	9.1361e-06	3.39684e-05	1.55843e-05	1.7522e-05	2.22084e-05
ANKRD20A4	ANKRD20A4	ANKRD20A4	chr9:69381980-69425109	IPF	CTRL	NOTEST	0.40433	0.261971	0.626123	1.54341	0	1	1	no	IPF vs CONTROL UP	unique	0.409502	0	0.199534	0	0.773373	1.04357	0.336531	0.34055	0.315417	0.0432051	0.274154
ANKRD20A5P	ANKRD20A5P	ANKRD20A5P	chr18:14179095-14227049	IPF	CTRL	OK	2.35067	1.2513	0.909645	1.87858	-0.887301	0.0318	0.0960978	no	IPF vs CONTROL UP	unique	2.32711	2.03135	2.12592	2.27424	1.93094	3.41448	1.41431	1.2902	1.64311	0.818366	1.09052
ANKRD20A8P	ANKRD20A8P	ANKRD20A8P	chr2:95421070-95522820	IPF	CTRL	NOTEST	0.696919	0.11583	2.58898	6.01673	0	1	1	no	IPF vs CONTROL UP	unique	0.156755	0.446192	0.0954695	0.328268	1.88378	1.27105	0.100637	0.162952	0.0754634	0.0826889	0.15741
ANKRD20A9P	ANKRD20A9P	ANKRD20A9P	chr13:19408542-19446109	IPF	CTRL	NOTEST	0.136935	0.0635817	1.10681	2.15369	0	1	1	no	IPF vs CONTROL UP	unique	0.223292	0.0677942	0.117716	0.124825	0.0638072	0.224177	0.0897404	0.0851324	0.0430109	0.0352992	0.0647258
ANKRD22	ANKRD22	ANKRD22	chr10:90562486-90611732	IPF	CTRL	NOTEST	0.777127	0.362483	1.10023	2.1439	0	1	1	no	IPF vs CONTROL UP	unique	0.504265	0.902223	1.18446	0.603489	1.05109	0.417232	0.110986	0.599099	0.346808	0.417965	0.337559
ANKRD23	ANKRD23	ANKRD23	chr2:97503650-97509758	IPF	CTRL	OK	9.29108	4.39218	1.08091	2.11537	-1.47477	0.00065	0.00419729	yes	IPF vs CONTROL UP	unique	8.24305	8.74259	4.12878	6.61777	17.9429	10.0714	2.61112	5.63369	3.47855	4.11209	6.12543
ANKRD24	ANKRD24	ANKRD24	chr19:4183350-4224811	IPF	CTRL	NOTEST	1.02063	0.577191	0.822337	1.76827	0	1	1	no	IPF vs CONTROL UP	unique	0.498724	1.13566	0.82434	2.1885	0.733785	0.742764	0.731766	0.518456	0.411597	0.413367	0.810771
ANKRD26	ANKRD26	ANKRD26	chr10:27293044-27389427	IPF	CTRL	OK	9.43263	3.18648	1.5657	2.9602	-2.63199	5e-05	0.000459061	yes	IPF vs CONTROL UP	unique	5.64586	10.3833	6.82413	7.24544	17.0481	9.44897	4.11108	2.95733	2.37662	2.62442	3.86296
ANKRD26P1	ANKRD26P1	ANKRD26P1	chr16:46503248-46603009	IPF	CTRL	NOTEST	0.0197539	0.00964516	1.03426	2.04806	0	1	1	no	IPF vs CONTROL UP	unique	0	0	0	0.0647901	0	0.0537332	0	0.0482258	0	0	0
ANKRD26P3	ANKRD26P3	ANKRD26P3	chr13:19836939-19919113	IPF	CTRL	NOTEST	0.0408329	0	Inf	0	0	1	1	no	IPF vs CONTROL UP (0)	unique	0	0	0	0	0.0662336	0.178764	0	0	0	0	0
ANKRD27	ANKRD27	ANKRD27	chr19:33087906-33166102	IPF	CTRL	OK	8.8413	10.5227	-0.251169	-1.19017	0.647204	0.12155	0.260189	no	IPF vs CONTROL DOWN	unique	8.99306	8.70334	8.99591	11.1226	7.71751	7.51536	12.5013	9.74979	8.34998	11.3491	10.6631
ANKRD28	ANKRD28	ANKRD28	chr3:15708743-15901053	IPF	CTRL	HIDATA	14.7167	8.14862	0.852829	1.80604	0	1	1	no	IPF vs CONTROL UP	unique	11.6956	13.5774	15.4547	16.8295	14.9677	15.7754	0	7.63947	17.9698	6.77134	8.36248
ANKRD29	ANKRD29	ANKRD29	chr18:21179977-21242849	IPF	CTRL	OK	9.18271	17.8484	-0.958802	-1.94369	1.91821	5e-05	0.000459061	yes	IPF vs CONTROL DOWN	unique	4.25944	5.43761	8.02539	21.788	6.76478	8.82103	16.3534	15.0251	19.507	20.3733	17.9831
ANKRD30A	ANKRD30A	ANKRD30A	chr10:37414784-37521495	IPF	CTRL	NOTEST	0	0	0	1	0	1	1	no	IPF vs. CONTROL EQUAL(0)	unique	0	0	0	0	0	0	0	0	0	0	0
ANKRD30B	ANKRD30B	ANKRD30B	chr18:14748238-14852737	IPF	CTRL	NOTEST	0	0.00828596	#NAME?	0	0	1	1	no	IPF vs CONTROL DOWN (0)	unique	0	0	0	0	0	0	0	0	0	0	0.0414298
ANKRD30BL	ANKRD30BL	ANKRD30BL	chr2:132905163-133015542	IPF	CTRL	OK	0.146219	0.347265	-1.24791	-2.37497	1.38624	0.002	0.0106834	yes	IPF vs CONTROL DOWN	unique	0	0.241973	0.389195	0	0	0.246145	0.0546827	0.66243	0	0.4493	0.569914
ANKRD30BP2	ANKRD30BP2	ANKRD30BP2	chr21:14410486-14490571	IPF	CTRL	NOTEST	0	0	0	1	0	1	1	no	IPF vs. CONTROL EQUAL(0)	unique	0	0	0	0	0	0	0	0	0	0	0
ANKRD30BP3	ANKRD30BP3	ANKRD30BP3	chr10:45650109-45681489	IPF	CTRL	NOTEST	0	0	0	1	0	1	1	no	IPF vs. CONTROL EQUAL(0)	unique	0	0	0	0	0	0	0	0	0	0	0
ANKRD31	ANKRD31	ANKRD31	chr5:74364121-74532703	IPF	CTRL	NOTEST	0.436118	0.16197	1.42899	2.69258	0	1	1	no	IPF vs CONTROL UP	unique	0.423608	0.0535893	0.257853	0.460188	0.7672	0.65427	0.169139	0.146802	0.135971	0.0744506	0.283489
ANKRD32	ANKRD32	ANKRD32	chr5:93954390-94031573	IPF	CTRL	OK	4.30095	2.09801	1.03563	2.05001	-1.28357	0.00265	0.0134354	yes	IPF vs CONTROL UP	unique	3.84275	5.4905	2.84502	5.2599	4.52718	3.84034	2.78619	2.11485	2.10388	1.66928	1.81585
ANKRD33	ANKRD33	ANKRD33	chr12:52281792-52285505	IPF	CTRL	NOTEST	0	0.0669904	#NAME?	0	0	1	1	no	IPF vs CONTROL DOWN (0)	unique	0	0	0	0	0	0	0	0.173897	0.161055	0	0
ANKRD33B	ANKRD33B	ANKRD33B	chr5:10564434-10657928	IPF	CTRL	OK	2.63818	4.07176	-0.62611	-1.5434	1.60221	0.00025	0.00189363	yes	IPF vs CONTROL DOWN	unique	2.53984	2.61634	2.24475	2.61903	2.41162	3.39748	2.73121	3.74101	4.80446	5.33936	3.74274
ANKRD34A	ANKRD34A	ANKRD34A	chr1:145470507-145475647	IPF	CTRL	NOTEST	1.23671	0.972354	0.346958	1.27188	0	1	1	no	IPF vs CONTROL UP	unique	1.11547	1.81435	1.0676	2.11345	0.478764	0.830649	0.695688	0.993918	1.074	0.924674	1.17349
ANKRD34B	ANKRD34B	ANKRD34B	chr5:79852573-79866304	IPF	CTRL	NOTEST	0.0398406	0.0813061	-1.02912	-2.04078	0	1	1	no	IPF vs CONTROL DOWN	unique	0.0729427	0.166101	0	0	0	0	0.0374604	0.151656	0.140465	0.0769491	0
ANKRD34C	ANKRD34C	ANKRD34C	chr15:79484048-79590581	IPF	CTRL	NOTEST	0.0553034	0.0679582	-0.297279	-1.22883	0	1	1	no	IPF vs CONTROL DOWN	unique	0	0.23906	0.0319549	0	0	0.0608053	0	0.054572	0.202182	0.0830368	0
ANKRD35	ANKRD35	ANKRD35	chr1:145549208-145568526	IPF	CTRL	NOTEST	1.54819	1.15143	0.427159	1.34458	0	1	1	no	IPF vs CONTROL UP	unique	0.857815	2.53939	1.04502	0.35924	2.79845	1.68921	0.815153	0.802537	1.15626	1.71969	1.26349
ANKRD36	ANKRD36	ANKRD36	chr2:97779232-97930257	IPF	CTRL	OK	9.65349	4.91015	0.975283	1.96603	-1.43064	0.0008	0.00499761	yes	IPF vs CONTROL UP	unique	7.83575	12.1704	6.01016	13.9182	9.0145	8.97192	3.90622	5.27406	6.67318	4.05974	4.63756
ANKRD36B	ANKRD36B	ANKRD36B	chr2:98121260-98206428	IPF	CTRL	OK	6.47132	2.94592	1.13534	2.1967	-1.59367	0.0002	0.00156984	yes	IPF vs CONTROL UP	unique	4.55695	9.99844	3.49623	7.09415	7.2487	6.43344	3.0217	3.55324	2.19406	3.22865	2.73197
ANKRD36BP1	ANKRD36BP1	ANKRD36BP1	chr1:168214818-168216668	IPF	CTRL	OK	36.0438	23.0911	0.642416	1.56094	-0.751151	0.0676	0.169689	no	IPF vs CONTROL UP	unique	35.7938	25.2206	43.2704	25.9631	37.1186	48.8966	28.9712	29.6917	15.7579	20.5999	20.4348
ANKRD36BP2	ANKRD36BP2	ANKRD36BP2	chr2:89065418-89106109	IPF	CTRL	OK	9.67605	1.07275	3.1731	9.01985	-3.34209	5e-05	0.000459061	yes	IPF vs CONTROL UP	unique	2.58636	10.7978	17.3555	2.64429	18.6809	5.99148	3.23686	0.537542	0.331895	0.910812	0.346648
ANKRD37	ANKRD37	ANKRD37	chr4:186317839-186347139	IPF	CTRL	OK	5.6269	6.02609	-0.0988824	-1.07094	0.171137	0.7053	0.832133	no	IPF vs CONTROL DOWN	unique	2.41685	5.55931	3.21427	2.07511	15.9205	4.57537	12.7819	2.25538	4.17513	5.8499	5.06816
ANKRD39	ANKRD39	ANKRD39	chr2:97513723-97523756	IPF	CTRL	OK	9.93806	6.94784	0.516399	1.43038	-0.636877	0.12755	0.269304	no	IPF vs CONTROL UP	unique	7.81492	11.73	3.91304	7.40888	20.5336	8.22794	8.06066	5.90243	5.46588	6.96165	8.3486
ANKRD40	ANKRD40	ANKRD40	chr17:48770550-48785270	IPF	CTRL	OK	22.0839	30.5868	-0.469912	-1.38503	1.49207	0.0005	0.00338298	yes	IPF vs CONTROL DOWN	unique	21.72	19.1734	25.3221	23.8974	16.7532	25.6375	24.4608	34.9412	32.0319	29.7995	31.7006
ANKRD42	ANKRD42	ANKRD42	chr11:82905290-82960013	IPF	CTRL	OK	4.93952	2.81267	0.812431	1.75617	-0.962686	0.0255	0.0816701	no	IPF vs CONTROL UP	unique	3.64291	4.14776	2.9138	4.13012	8.60488	6.19768	2.80798	2.01156	2.19184	3.5449	3.50708
ANKRD44	ANKRD44	ANKRD44	chr2:197851385-198175521	IPF	CTRL	OK	37.2086	34.5715	0.106057	1.07628	0.109654	0.7975	0.892138	no	IPF vs CONTROL UP	unique	37.4833	42.7396	31.1769	58.9588	27.2764	25.6169	41.6567	40.0671	27.6763	32.4671	30.9901
ANKRD45	ANKRD45	ANKRD45	chr1:173577474-173639001	IPF	CTRL	OK	8.50993	1.45627	2.54687	5.84364	-2.76843	5e-05	0.000459061	yes	IPF vs CONTROL UP	unique	4.57756	5.9565	3.3207	3.19393	23.0274	10.9835	2.1001	0.226573	0.734467	0.862778	3.35745
ANKRD46	ANKRD46	ANKRD46	chr8:101521979-101572014	IPF	CTRL	OK	6.07559	6.64367	-0.128956	-1.0935	0.557383	0.19555	0.366405	no	IPF vs CONTROL DOWN	unique	6.37438	5.86118	7.74543	6.55479	4.80956	5.10822	7.47162	6.99242	5.49931	6.77064	6.48437
ANKRD49	ANKRD49	ANKRD49	chr11:94227152-94232744	IPF	CTRL	OK	12.7482	5.7697	1.14372	2.2095	-1.47829	0.00065	0.00419729	yes	IPF vs CONTROL UP	unique	9.33501	16.1204	8.82417	18.442	10.4317	13.3357	6.99997	8.08451	4.64226	4.84773	4.27402
ANKRD50	ANKRD50	ANKRD50	chr4:125585203-125633887	IPF	CTRL	OK	15.9898	16.9803	-0.0867069	-1.06194	0.606056	0.1558	0.311868	no	IPF vs CONTROL DOWN	unique	15.8586	15.9726	16.6251	20.2267	10.9306	16.3253	15.6692	18.9249	15.3029	16.9395	18.0649
ANKRD52	ANKRD52	ANKRD52	chr12:56623819-56652143	IPF	CTRL	OK	19.1697	13.5707	0.498332	1.41258	-0.673984	0.11515	0.250094	no	IPF vs CONTROL UP	unique	21.7005	20.5832	14.0996	18.9192	19.2275	20.4883	12.461	14.623	11.0931	15.069	14.6075
ANKRD53	ANKRD53	ANKRD53	chr2:71205574-71212629	IPF	CTRL	NOTEST	1.57394	1.285	0.292608	1.22485	0	1	1	no	IPF vs CONTROL UP	unique	0.444879	1.26536	1.01644	2.71275	1.91191	2.09229	1.28541	0.462352	1.85566	1.33126	1.49033
ANKRD54	ANKRD54	ANKRD54	chr22:38226861-38240378	IPF	CTRL	OK	11.1346	8.23088	0.435927	1.35278	-0.355744	0.4071	0.596322	no	IPF vs CONTROL UP	unique	11.2307	11.6972	5.83459	7.8514	19.1089	11.0846	8.6317	7.3129	7.58577	10.0064	7.61762
ANKRD55	ANKRD55	ANKRD55	chr5:55395506-55529186	IPF	CTRL	NOTEST	0.15999	0.0766416	1.06178	2.08751	0	1	1	no	IPF vs CONTROL UP	unique	0.116798	0.265969	0.213546	0.16297	0.200656	0	0.120044	0	0	0.18494	0.078224
ANKRD6	ANKRD6	ANKRD6	chr6:90142896-90348474	IPF	CTRL	OK	4.98833	3.95307	0.335584	1.26189	0.0669857	0.87875	0.938138	no	IPF vs CONTROL UP	unique	3.55205	4.15293	5.14322	5.57355	4.70337	6.80488	4.67602	3.33461	3.31851	3.14274	5.29348
ANKRD61	ANKRD61	ANKRD61	chr7:6048881-6098860	IPF	CTRL	OK	6.31813	3.55597	0.829255	1.77677	-0.276825	0.57955	0.742462	no	IPF vs CONTROL UP	unique	7.02367	6.7856	5.71694	8.00712	4.21241	6.16302	2.19066	5.08638	3.68657	2.24994	4.56629
ANKRD62P1-PARP4P3	ANKRD62P1-PARP4P3	ANKRD62P1-PARP4P3	chr22:17134598-17156430	IPF	CTRL	NOTEST	0.276788	0.111823	1.30757	2.47524	0	1	1	no	IPF vs CONTROL UP	unique	0.586978	0.222781	0.119407	0	0.504937	0.226626	0.352332	0	0	0.206781	0
ANKRD63	ANKRD63	ANKRD63	chr15:40573644-40574787	IPF	CTRL	NOTEST	0.0451183	0.050266	-0.155868	-1.11409	0	1	1	no	IPF vs CONTROL DOWN	unique	0.27071	0	0	0	0	0	0.0697178	0	0	0	0.181612
ANKRD65	ANKRD65	ANKRD65	chr1:1353799-1356824	IPF	CTRL	OK	15.9108	8.43458	0.915617	1.88638	-1.18851	0.0068	0.0285118	yes	IPF vs CONTROL UP	unique	17.6711	12.3311	10.0651	11.5155	25.5994	18.2825	8.82314	8.85713	5.12257	8.91265	10.4574
ANKRD66	ANKRD66	ANKRD66	chr6:46714653-46726954	IPF	CTRL	OK	5.78571	1.69646	1.76997	3.41046	-1.22861	0.01085	0.0416223	yes	IPF vs CONTROL UP	unique	2.6584	3.36333	2.34751	0.411071	19.0919	6.84205	1.67417	0.306818	0.284136	0.468946	5.74823
ANKRD7	ANKRD7	ANKRD7	chr7:117864711-117882784	IPF	CTRL	NOTEST	0.0865333	0.0115365	2.90706	7.50086	0	1	1	no	IPF vs CONTROL UP	unique	0	0	0	0	0	0.5192	0.0576823	0	0	0	0
ANKRD9	ANKRD9	ANKRD9	chr14:102973197-102976128	IPF	CTRL	OK	5.24019	7.59016	-0.53451	-1.44845	0.977938	0.01985	0.0672423	no	IPF vs CONTROL DOWN	unique	5.71261	5.66516	3.82293	5.13743	4.91314	6.18988	6.7778	4.40429	6.73919	11.8779	8.15161
ANKS1A	ANKS1A	ANKS1A	chr6:34857037-35059190	IPF	CTRL	OK	20.9443	26.9699	-0.364793	-1.2877	1.20937	0.0046	0.0209014	yes	IPF vs CONTROL DOWN	unique	18.8148	18.8776	18.8513	24.5948	22.8879	21.6395	25.4883	25.0902	24.6592	28.299	31.313
ANKS1B	ANKS1B	ANKS1B	chr12:99039077-100378432	IPF	CTRL	OK	2.41644	1.89237	0.352692	1.27694	-0.36383	0.3525	0.545791	no	IPF vs CONTROL UP	unique	2.11241	2.13862	2.51632	2.86943	1.92862	2.93327	1.41599	1.61782	3.50291	1.54942	1.37571
ANKS3	ANKS3	ANKS3	chr16:4746510-4799397	IPF	CTRL	OK	4.93191	3.55812	0.471031	1.3861	-0.405353	0.32555	0.518586	no	IPF vs CONTROL UP	unique	5.354	5.2201	2.67535	5.33217	5.77341	5.23641	3.28639	3.29088	4.52071	2.79487	3.89774
ANKS4B	ANKS4B	ANKS4B	chr16:21245015-21263750	IPF	CTRL	NOTEST	0.133898	0.0267358	2.32429	5.0082	0	1	1	no	IPF vs CONTROL UP	unique	0	0.113651	0	0	0.342865	0.346873	0	0	0	0	0.133679
ANKS6	ANKS6	ANKS6	chr9:101494290-101558794	IPF	CTRL	OK	9.59369	6.30749	0.605021	1.521	-0.788365	0.06475	0.163865	no	IPF vs CONTROL UP	unique	10.3839	7.58095	7.64662	9.91001	9.55298	12.4877	4.74013	5.48038	6.45004	7.62657	7.24032
ANKUB1	ANKUB1	ANKUB1	chr3:149478889-149510610	IPF	CTRL	OK	6.36485	1.28403	2.30945	4.95693	-2.40067	5e-05	0.000459061	yes	IPF vs CONTROL UP	unique	2.83522	9.01193	0.575985	1.48348	18.6721	5.61038	1.48739	0	0.34117	0.872944	3.71865
ANKZF1	ANKZF1	ANKZF1	chr2:220094478-220101391	IPF	CTRL	OK	17.1541	9.39552	0.868505	1.82577	-1.25959	0.00305	0.0151242	yes	IPF vs CONTROL UP	unique	10.2881	21.6221	13.5039	23.7306	20.6839	13.0957	12.2583	8.83989	7.17793	9.00991	9.69155
ANLN	ANLN	ANLN	chr7:36363758-36493400	IPF	CTRL	NOTEST	1.10162	0.177389	2.63463	6.21015	0	1	1	no	IPF vs CONTROL UP	unique	1.37686	0.886061	1.27566	0.41799	1.33558	1.31754	0.199794	0.124469	0.172927	0.189418	0.200339
ANO1	ANO1	ANO1	chr11:69924407-70035652	IPF	CTRL	OK	9.14553	16.8397	-0.880726	-1.8413	2.1647	5e-05	0.000459061	yes	IPF vs CONTROL DOWN	unique	5.99727	15.0087	8.42343	8.37511	7.43903	9.62965	10.1767	16.8226	23.385	14.6927	19.1214
ANO10	ANO10	ANO10	chr3:43407817-43663560	IPF	CTRL	OK	12.4424	9.96271	0.32065	1.24889	-0.157045	0.713	0.836981	no	IPF vs CONTROL UP	unique	12.658	14.7066	10.1759	16.4841	10.7738	9.85576	11.6148	12.1587	7.68021	9.59835	8.76148
ANO2	ANO2	ANO2	chr12:5671816-6055398	IPF	CTRL	OK	4.54235	3.72364	0.286726	1.21987	-0.202158	0.64145	0.788872	no	IPF vs CONTROL UP	unique	5.18279	5.90099	4.28714	6.04784	2.78877	3.04658	4.29074	3.94028	2.23439	5.3046	2.84819
ANO3	ANO3	ANO3	chr11:26353677-26684836	IPF	CTRL	NOTEST	0.451813	0.398688	0.180463	1.13325	0	1	1	no	IPF vs CONTROL UP	unique	0.191504	0	0.116571	1.06991	0.944679	0.388212	0.221202	0.199097	0.599325	0.429138	0.54468
ANO4	ANO4	ANO4	chr12:101188373-101522419	IPF	CTRL	NOTEST	0.229916	0.171828	0.420143	1.33806	0	1	1	no	IPF vs CONTROL UP	unique	0.417449	0.396079	0.127102	0	0.358274	0.0805933	0.125052	0.216984	0.200972	0.0366963	0.279436
ANO5	ANO5	ANO5	chr11:22214721-22304913	IPF	CTRL	OK	1.8142	1.66487	0.123928	1.0897	0.0949098	0.82675	0.909809	no	IPF vs CONTROL UP	unique	1.95889	1.3091	2.28092	2.02244	1.24202	2.07185	1.91274	1.15112	2.41945	2.04311	0.797924
ANO6	ANO6	ANO6	chr12:45566816-45834187	IPF	CTRL	OK	26.0199	50.9607	-0.96977	-1.95853	2.2341	5e-05	0.000459061	yes	IPF vs CONTROL DOWN	unique	24.9155	22.2755	40.3667	23.0549	20.8282	24.6786	39.1476	53.5912	56.0187	52.7972	53.2488
ANO7	ANO7	ANO7	chr2:242127923-242164791	IPF	CTRL	NOTEST	1.34919	0.736943	0.872472	1.8308	0	1	1	no	IPF vs CONTROL UP	unique	1.75838	1.97645	0.591958	1.26038	1.38193	1.12606	0.627294	0.721845	0.60172	0.292985	1.44087
ANO8	ANO8	ANO8	chr19:17420336-17445638	IPF	CTRL	OK	6.83881	4.99634	0.452874	1.36876	-0.373442	0.38765	0.57891	no	IPF vs CONTROL UP	unique	9.73232	8.33034	4.28717	7.5174	7.16787	3.99774	3.77496	4.16179	4.6522	5.97046	6.42227
ANO9	ANO9	ANO9	chr11:417929-442011	IPF	CTRL	OK	9.0285	4.59467	0.974525	1.96499	-1.62632	0.0004	0.00281058	yes	IPF vs CONTROL UP	unique	9.18544	9.42403	4.91998	14.0874	9.1881	7.36608	4.27843	4.61654	4.17861	4.15456	5.74522
ANP32A	ANP32A	ANP32A	chr15:69070874-69113261	IPF	CTRL	OK	24.586	23.5685	0.0609815	1.04318	0.317316	0.45985	0.643654	no	IPF vs CONTROL UP	unique	24.1711	20.7756	27.2242	23.1449	23.1043	29.0961	23.2907	29.3104	21.1014	22.9518	21.188
ANP32A-IT1	ANP32A-IT1	ANP32A-IT1	chr15:69070874-69113261	IPF	CTRL	OK	10.777	4.91456	1.13282	2.19287	-0.948557	0.0312	0.0947192	no	IPF vs CONTROL UP	unique	13.0243	10.0197	7.7192	11.7929	7.63084	14.4751	4.38483	6.49496	4.65998	3.43568	5.59736
ANP32AP1	ANP32AP1	ANP32AP1	chr15:35529526-35530264	IPF	CTRL	OK	5.85779	5.43396	0.108354	1.078	0.2364	0.5695	0.734931	no	IPF vs CONTROL UP	unique	5.35433	4.06467	6.83744	8.05472	3.08481	7.75079	5.64541	4.16901	6.43407	4.02317	6.89812
ANP32B	ANP32B	ANP32B	chr9:100745488-100778224	IPF	CTRL	OK	18.0051	21.4983	-0.255813	-1.19401	0.860031	0.0444	0.123212	no	IPF vs CONTROL DOWN	unique	15.5823	14.9964	28.637	16.2903	13.4019	19.1229	17.7494	27.758	23.744	18.7198	19.5202
ANP32C	ANP32C	ANP32C	chr4:164445449-165304407	IPF	CTRL	OK	1.80615	4.2274	-1.22685	-2.34055	0.408557	0.3678	0.560169	no	IPF vs CONTROL DOWN	unique	3.29753	0.536421	2.02212	1.30782	2.03646	1.63657	3.28542	4.89011	4.5281	3.99914	4.43422
ANP32D	ANP32D	ANP32D	chr12:48866447-48866843	IPF	CTRL	NOTEST	0	0.10265	#NAME?	0	0	1	1	no	IPF vs CONTROL DOWN (0)	unique	0	0	0	0	0	0	0.513248	0	0	0	0
ANP32E	ANP32E	ANP32E	chr1:150190716-150208504	IPF	CTRL	OK	16.8938	14.1505	0.255646	1.19387	-0.0105958	0.98035	0.991196	no	IPF vs CONTROL UP	unique	18.0364	12.6299	17.5692	14.4519	18.7308	19.9448	11.9427	19.1237	16.2868	10.3396	13.0596
ANPEP	ANPEP	ANPEP	chr15:90328125-90358072	IPF	CTRL	OK	7.44058	5.02722	0.565654	1.48006	-0.705176	0.09545	0.218987	no	IPF vs CONTROL UP	unique	10.4043	5.56407	6.09664	5.61207	10.7578	6.20858	7.22615	3.19554	2.42848	7.48413	4.8018
ANTXR1	ANTXR1	ANTXR1	chr2:69240275-69476459	IPF	CTRL	OK	56.0898	66.2955	-0.241173	-1.18195	0.833686	0.0407	0.11544	no	IPF vs CONTROL DOWN	unique	51.142	69.4902	65.4812	41.0822	36.0508	73.2925	50.6739	57.5451	76.3702	60.6553	86.2332
ANTXR2	ANTXR2	ANTXR2	chr4:80822770-80994477	IPF	CTRL	OK	21.3565	22.7794	-0.0930548	-1.06663	0.451098	0.2867	0.475552	no	IPF vs CONTROL DOWN	unique	20.8884	19.2524	24.5039	27.7025	15.0942	20.6978	22.8005	20.8938	20.3327	29.7127	20.1575
ANXA1	ANXA1	ANXA1	chr9:75766780-75785307	IPF	CTRL	OK	74.6341	144.463	-0.952791	-1.93561	2.49069	5e-05	0.000459061	yes	IPF vs CONTROL DOWN	unique	75.2335	63.1978	90.1405	45.9158	121.837	51.4799	236.335	73.4386	173.37	129.273	109.897
ANXA10	ANXA10	ANXA10	chr4:169013687-169108893	IPF	CTRL	NOTEST	0.323956	0.136404	1.24791	2.37498	0	1	1	no	IPF vs CONTROL UP	unique	0.627026	0.475963	0.127584	0.29124	0.17984	0.242085	0.107556	0.434341	0	0	0.140123
ANXA11	ANXA11	ANXA11	chr10:81914879-81965328	IPF	CTRL	OK	53.9468	71.1008	-0.398329	-1.31798	1.21558	0.0042	0.0194337	yes	IPF vs CONTROL DOWN	unique	61.6014	46.1632	56.5953	50.8226	56.177	52.3211	63.4912	69.8388	69.4221	77.2149	75.5369
ANXA13	ANXA13	ANXA13	chr8:124693033-124749647	IPF	CTRL	NOTEST	0.109287	0.0670852	0.704053	1.62908	0	1	1	no	IPF vs CONTROL UP	unique	0	0	0.1254	0	0.530321	0	0	0	0.1977	0	0.137726
ANXA2	ANXA2	ANXA2	chr15:60639349-60690185	IPF	CTRL	OK	64.7498	82.7892	-0.354567	-1.2786	1.52795	0.00045	0.00310007	yes	IPF vs CONTROL DOWN	unique	75.8455	46.0371	61.0376	50.9602	95.6887	58.9298	96.4006	75.3949	83.7865	81.072	77.2921
ANXA2P1	ANXA2P1	ANXA2P1	chr4:154074269-154260474	IPF	CTRL	OK	8.49132	5.13119	0.726695	1.65484	-0.243098	0.64095	0.788449	no	IPF vs CONTROL UP	unique	9.97411	5.42029	10.3812	7.26312	8.1947	9.71453	5.54241	5.18147	4.3624	4.7936	5.77609
ANXA2P2	ANXA2P2	ANXA2P2	chr9:33624222-33625532	IPF	CTRL	OK	94.4043	160.774	-0.768109	-1.70304	2.05601	5e-05	0.000459061	yes	IPF vs CONTROL DOWN	unique	88.7482	78.2418	120.627	54.8347	157.605	66.3692	233.826	147.868	147.701	149.511	124.964
ANXA2P3	ANXA2P3	ANXA2P3	chr10:66585284-66586634	IPF	CTRL	OK	0.943262	1.76621	-0.90493	-1.87245	0.947188	0.02595	0.082657	no	IPF vs CONTROL DOWN	unique	1.12701	0.256648	1.23867	0.314007	1.94003	0.783207	2.43642	2.10771	1.73509	1.19159	1.36026
ANXA2R	ANXA2R	ANXA2R	chr5:43039181-43040447	IPF	CTRL	OK	6.89815	3.51411	0.973049	1.96299	-1.09447	0.0118	0.0446338	yes	IPF vs CONTROL UP	unique	7.25477	6.60842	3.98792	10.7778	6.03787	6.72214	2.42783	3.51735	3.25744	4.47557	3.89238
ANXA3	ANXA3	ANXA3	chr4:79472741-79531605	IPF	CTRL	OK	5.6132	41.4577	-2.88475	-7.38575	4.53557	5e-05	0.000459061	yes	IPF vs CONTROL DOWN	unique	5.37246	3.58592	7.0084	11.3623	3.34601	3.0041	43.5996	34.6515	38.6888	51.4843	38.8643
ANXA4	ANXA4	ANXA4	chr2:69969126-70053596	IPF	CTRL	OK	27.2165	33.1586	-0.284904	-1.21833	0.862254	0.0432	0.120589	no	IPF vs CONTROL DOWN	unique	30.6421	16.584	36.0223	16.867	40.2642	22.9193	37.1894	31.1328	32.1408	28.5109	36.8193
ANXA5	ANXA5	ANXA5	chr4:122589151-122618147	IPF	CTRL	OK	73.6271	104.358	-0.503239	-1.41739	1.50195	0.00045	0.00310007	yes	IPF vs CONTROL DOWN	unique	77.4897	72.2082	97.0867	55.9667	83.594	55.4172	150.671	87.1508	113.216	104.983	65.7716
ANXA6	ANXA6	ANXA6	chr5:150480266-150537443	IPF	CTRL	OK	38.8619	52.7989	-0.442152	-1.35863	1.21769	0.00495	0.0221007	yes	IPF vs CONTROL DOWN	unique	31.375	47.9443	57.1672	30.4219	36.0876	30.1752	47.1124	58.3822	48.5336	55.6943	54.2718
ANXA7	ANXA7	ANXA7	chr10:75135188-75173841	IPF	CTRL	OK	33.9739	34.6065	-0.0266148	-1.01862	0.415952	0.3251	0.518251	no	IPF vs CONTROL DOWN	unique	35.9344	31.3523	37.5206	22.0855	46.9693	29.9815	40.8246	30.4788	33.6621	36.7087	31.3583
ANXA8	ANXA8,ANXA8L1	ANXA8,ANXA8L1	chr10:48255203-48271368	IPF	CTRL	NOTEST	0.0906097	0.323886	-1.83775	-3.57452	0	1	1	no	IPF vs CONTROL DOWN	multiple	0.000217953	0	0	0	0.54344	0	0.0609353	0.574366	0.151428	0.250449	0.582249
ANXA8L1	ANXA8L1	ANXA8L1	chr10:48255203-48271368	IPF	CTRL	NOTEST	0.176699	0.0283311	2.64084	6.23693	0	1	1	no	IPF vs CONTROL UP	multiple	1.05987	0	0	0	0.000330551	0	0.0195125	0.000818102	0.000750981	0.120053	0.000520675
ANXA8L2	ANXA8L2	ANXA8L2	chr10:47746919-47763040	IPF	CTRL	OK	1.20007	2.23922	-0.899874	-1.8659	0.910535	0.03095	0.0941867	no	IPF vs CONTROL DOWN	unique	0.582053	0.331362	0.26618	0.202951	3.62674	2.19114	1.60842	3.47829	3.36153	1.38303	1.36481
ANXA9	ANXA9	ANXA9	chr1:150954498-150968114	IPF	CTRL	OK	2.13506	3.01164	-0.49627	-1.41056	0.752403	0.07805	0.189362	no	IPF vs CONTROL DOWN	unique	1.46655	2.22643	2.28594	2.04492	2.52163	2.26492	1.59213	4.06419	3.60722	2.40981	3.38486
AOAH	AOAH	AOAH	chr7:36552548-36764154	IPF	CTRL	OK	11.5655	9.14404	0.33892	1.26481	-0.483117	0.25845	0.442953	no	IPF vs CONTROL UP	unique	12.5908	12.1513	6.4314	16.2289	11.4341	10.5563	11.2192	11.3418	5.88714	11.3289	5.94314
AOAH-IT1	AOAH-IT1	AOAH-IT1	chr7:36552548-36764154	IPF	CTRL	NOTEST	0.723898	1.04042	-0.523311	-1.43725	0	1	1	no	IPF vs CONTROL DOWN	unique	1.21264	0.690456	0.372692	0.839989	0.525534	0.702076	1.25547	1.2582	0.582478	1.28942	0.816542
AOC2	AOC2	AOC2	chr17:40996608-41002724	IPF	CTRL	OK	2.30753	2.26221	0.0286168	1.02003	0.062001	0.88505	0.941745	no	IPF vs CONTROL UP	unique	1.46672	2.95462	1.44388	3.30616	2.71346	1.96033	2.07305	1.6418	2.60677	2.11811	2.87131
AOC3	AOC3	AOC3	chr17:41003200-41010140	IPF	CTRL	OK	49.4782	126.726	-1.35684	-2.56124	3.05541	5e-05	0.000459061	yes	IPF vs CONTROL DOWN	unique	48.6024	54.2824	75.9454	38.209	26.6677	53.1625	83.2048	143.723	133.666	148.286	124.748
AOC4	AOC4	AOC4	chr17:41019161-41021234	IPF	CTRL	OK	2.74726	3.51995	-0.357562	-1.28126	0.507031	0.22585	0.403944	no	IPF vs CONTROL DOWN	unique	3.27166	3.23922	1.4744	3.57128	1.46694	3.46007	2.30351	3.2524	4.38147	3.75533	3.90706
AOX1	AOX1	AOX1	chr2:201450730-201536217	IPF	CTRL	OK	14.4571	6.93164	1.06051	2.08567	-1.64474	0.00015	0.00122565	yes	IPF vs CONTROL UP	unique	13.1294	5.66339	26.2341	13.3276	20.3481	8.03993	6.50366	7.81693	8.96664	9.24182	2.12915
AOX2P	AOX2P	AOX2P	chr2:201560445-201658941	IPF	CTRL	NOTEST	0.0898765	0	Inf	0	0	1	1	no	IPF vs CONTROL UP (0)	unique	0.154026	0	0.140709	0	0.0661053	0.178419	0	0	0	0	0
AP1AR	AP1AR	AP1AR	chr4:113152894-113191211	IPF	CTRL	OK	5.95534	5.46635	0.123606	1.08945	0.000166803	0.99955	0.999616	no	IPF vs CONTROL UP	unique	5.68753	6.82632	6.55163	5.19541	5.23955	6.23159	6.9063	4.83698	5.97328	4.14612	5.46907
AP1B1	AP1B1	AP1B1	chr22:29723668-29784572	IPF	CTRL	OK	23.1786	23.5689	-0.0240918	-1.01684	0.435209	0.30815	0.500018	no	IPF vs CONTROL DOWN	unique	24.5299	23.1278	20.1109	19.2945	30.4789	21.5294	25.972	21.8001	20.7562	25.0352	24.2809
AP1B1P1	AP1B1P1	AP1B1P1	chr22:32517963-32529456	IPF	CTRL	NOTEST	0	0	0	1	0	1	1	no	IPF vs. CONTROL EQUAL(0)	unique	0	0	0	0	0	0	0	0	0	0	0
AP1G1	AP1G1	AP1G1	chr16:71762904-71842976	IPF	CTRL	OK	31.1658	25.4822	0.290474	1.22304	-0.189501	0.65425	0.797614	no	IPF vs CONTROL UP	unique	30.5472	30.7683	25.757	36.8804	31.7856	31.2566	26.5526	26.7171	27.3007	24.8459	21.9949
AP1G2	AP1G2	AP1G2	chr14:23980968-24048009	IPF	CTRL	OK	26.672	14.3628	0.892985	1.85701	-1.0049	0.0204	0.068645	no	IPF vs CONTROL UP	unique	27.3445	31.4787	19.5498	32.671	23.7418	25.246	18.0147	14.2641	12.0456	13.0981	14.3916
AP1M1	AP1M1	AP1M1	chr19:16308664-16346156	IPF	CTRL	OK	15.5579	19.2465	-0.30695	-1.23709	1.02834	0.01565	0.0556008	no	IPF vs CONTROL DOWN	unique	16.6632	15.4329	17.8121	14.9202	16.1317	12.3874	18.3425	19.6457	15.442	22.6462	20.1563
AP1M2	AP1M2	AP1M2	chr19:10683346-10697991	IPF	CTRL	OK	5.48042	6.87023	-0.326072	-1.2536	0.719213	0.08405	0.199855	no	IPF vs CONTROL DOWN	unique	5.44681	2.51947	4.46477	5.22093	9.51303	5.71751	8.40394	6.01408	4.09553	7.28274	8.55487
AP1S1	AP1S1	AP1S1	chr7:100797685-100804557	IPF	CTRL	OK	9.84235	9.3856	0.0685544	1.04867	0.196394	0.6382	0.786213	no	IPF vs CONTROL UP	unique	16.72	4.82651	8.77283	5.9043	8.91997	13.9105	8.72874	10.276	7.25079	11.8287	8.84376
AP1S2	AP1S2	AP1S2	chrX:15843928-15873137	IPF	CTRL	OK	10.6217	8.21207	0.371198	1.29343	0.0838481	0.84775	0.921142	no	IPF vs CONTROL UP	unique	11.2426	9.49258	11.1651	11.9842	8.13979	11.706	11.9465	5.38285	7.90394	7.53516	8.2919
AP1S3	AP1S3	AP1S3	chr2:224620046-224702319	IPF	CTRL	OK	3.18178	5.4554	-0.777849	-1.71457	1.62681	0.00015	0.00122565	yes	IPF vs CONTROL DOWN	unique	3.36924	2.20373	2.83754	3.00272	3.6916	3.98586	4.1048	5.44011	7.38544	4.34826	5.99837
AP2A1	AP2A1	AP2A1	chr19:50270179-50316567	IPF	CTRL	OK	18.6135	21.4536	-0.204872	-1.15258	0.53957	0.2057	0.380157	no	IPF vs CONTROL DOWN	unique	18.9145	24.698	15.8963	15.116	23.9307	13.1253	21.3646	17.3411	21.5307	26.3087	20.7228
AP2A2	AP2A2	AP2A2	chr11:925808-1012245	IPF	CTRL	OK	21.3284	22.1901	-0.0571401	-1.0404	0.401975	0.347	0.539924	no	IPF vs CONTROL DOWN	unique	19.3372	23.8354	19.441	22.5455	22.1841	20.627	20.6834	22.5987	21.758	24.2232	21.687
AP2B1	AP2B1	AP2B1	chr17:33914281-34053436	IPF	CTRL	OK	33.1442	34.9299	-0.075706	-1.05388	0.536203	0.2092	0.384328	no	IPF vs CONTROL DOWN	unique	34.9043	25.5352	35.4424	31.1502	36.4699	35.3631	35.8056	37.5504	35.7841	32.8854	32.6239
AP2M1	AP2M1	AP2M1	chr3:183892633-183901879	IPF	CTRL	OK	48.9817	68.5936	-0.485833	-1.40039	1.44392	0.0006	0.00394505	yes	IPF vs CONTROL DOWN	unique	48.8402	47.068	65.918	33.9486	53.9574	44.1577	62.1121	81.3084	58.6516	77.2957	63.6004
AP2S1	AP2S1	AP2S1	chr19:47341422-47354203	IPF	CTRL	OK	23.4306	26.7673	-0.192082	-1.14241	0.940293	0.0297	0.0912998	no	IPF vs CONTROL DOWN	unique	27.7809	25.3364	29.2127	16.3509	26.9395	14.9629	29.0616	26.2312	23.1238	30.5923	24.8277
AP3B1	AP3B1	AP3B1	chr5:77298149-77590579	IPF	CTRL	OK	16.9425	11.5921	0.547509	1.46156	-0.824613	0.05035	0.135168	no	IPF vs CONTROL UP	unique	13.5699	20.3847	17.1327	16.7506	18.3514	15.4656	15.4699	11.8172	10.2611	9.33086	11.0812
AP3B2	AP3B2	AP3B2	chr15:83211950-83378635	IPF	CTRL	NOTEST	0.461379	0.190114	1.27909	2.42686	0	1	1	no	IPF vs CONTROL UP	unique	0.155227	0.795319	0.189076	0	0.999321	0.629333	0.298965	0	0.298913	0.0409411	0.31175
AP3D1	AP3D1	AP3D1	chr19:2100986-2151556	IPF	CTRL	OK	29.5299	27.486	0.103479	1.07436	0.1538	0.71895	0.840429	no	IPF vs CONTROL UP	unique	31.4695	32.6265	26.9016	26.3518	31.9299	27.9003	28.8406	25.9507	24.7158	28.5859	29.3372
AP3M1	AP3M1	AP3M1	chr10:75880014-75910826	IPF	CTRL	OK	13.6775	11.2114	0.286833	1.21996	-0.258322	0.54345	0.712358	no	IPF vs CONTROL UP	unique	14.8985	11.7782	14.626	10.8742	12.354	17.5338	11.7061	11.1241	12.0488	10.239	10.939
AP3M2	AP3M2	AP3M2	chr8:42010463-42028701	IPF	CTRL	OK	9.87604	8.71514	0.180408	1.1332	-0.00703021	0.98785	0.994994	no	IPF vs CONTROL UP	unique	7.2526	9.70952	9.51404	6.45337	12.1093	14.2174	7.65475	10.0248	8.67111	7.56765	9.65741
AP3S1	AP3S1	AP3S1	chr5:115177618-115249778	IPF	CTRL	OK	19.4002	13.5491	0.517874	1.43184	-0.345501	0.41145	0.600719	no	IPF vs CONTROL UP	unique	14.2257	18.8975	23.8919	12.5492	21.0235	25.8135	15.3186	12.3165	14.6002	10.4051	15.1052
AP3S2	AP3S2	AP3S2	chr15:90373830-90456222	IPF	CTRL	OK	9.31635	5.69208	0.710808	1.63672	-0.480861	0.2746	0.461444	no	IPF vs CONTROL UP	unique	13.6382	4.67066	8.76317	8.62908	8.95901	11.238	5.82537	10.612	1.60006	3.91658	6.50641
AP4B1	AP4B1	AP4B1	chr1:114356432-114447741	IPF	CTRL	OK	12.6256	6.8507	0.882029	1.84297	-0.788221	0.06505	0.164432	no	IPF vs CONTROL UP	unique	13.517	13.6416	7.77531	19.4383	12.4006	8.9808	7.32997	8.34837	6.67585	6.78861	5.1107
AP4B1-AS1	AP4B1-AS1	AP4B1-AS1	chr1:114356432-114447741	IPF	CTRL	OK	5.26782	2.49898	1.07586	2.10798	-0.463612	0.2885	0.477388	no	IPF vs CONTROL UP	unique	5.9349	3.30534	4.57344	7.10994	4.41879	6.2645	2.56537	2.65448	1.0108	2.62413	3.64014
AP4E1	AP4E1	AP4E1	chr15:51200868-51298097	IPF	CTRL	OK	5.62916	3.60497	0.642932	1.5615	-0.982879	0.0234	0.0764309	no	IPF vs CONTROL UP	unique	5.05809	6.39973	5.53802	6.32793	4.42587	6.0253	4.36031	3.8814	3.02941	3.27307	3.48065
AP4M1	AP4M1	AP4M1	chr7:99690403-99723128	IPF	CTRL	OK	6.6592	5.61149	0.246964	1.18671	-0.249372	0.5624	0.729372	no	IPF vs CONTROL UP	unique	5.5891	6.75234	6.43066	6.5845	7.86315	6.73545	6.42312	5.28312	4.50122	6.44668	5.40333
AP4S1	AP4S1	AP4S1	chr14:31363004-31565656	IPF	CTRL	OK	9.188	7.67867	0.258894	1.19656	0.0748173	0.86355	0.929497	no	IPF vs CONTROL UP	unique	8.22851	9.79644	7.22191	11.1474	6.58305	12.1507	6.31098	8.03815	7.7979	6.22864	10.0177
AP5B1	AP5B1	AP5B1	chr11:65541368-65548062	IPF	CTRL	OK	12.5046	13.4687	-0.107156	-1.0771	0.828964	0.05245	0.139422	no	IPF vs CONTROL DOWN	unique	15.311	13.1723	10.2093	13.6971	10.1827	12.4551	13.0589	14.4875	12.3833	13.6278	13.7861
AP5M1	AP5M1	AP5M1	chr14:57669193-57756797	IPF	CTRL	OK	14.6421	10.0707	0.539958	1.45393	-0.355051	0.4047	0.594012	no	IPF vs CONTROL UP	unique	14.8652	14.264	15.15	15.5289	11.8003	16.2444	11.7909	8.84363	10.9814	10.1616	8.57612
AP5S1	AP5S1	AP5S1	chr20:3801170-3805954	IPF	CTRL	OK	9.5099	7.80485	0.28506	1.21846	0.0127424	0.9765	0.989366	no	IPF vs CONTROL UP	unique	10.034	12.6908	8.83718	8.71534	7.25589	9.52621	7.58807	7.11544	7.35673	7.41619	9.54782
AP5Z1	AP5Z1	AP5Z1	chr7:4815261-4834026	IPF	CTRL	OK	8.63465	7.58566	0.186863	1.13829	-0.0973732	0.8201	0.905451	no	IPF vs CONTROL UP	unique	10.5201	9.39434	6.24718	10.8036	7.25608	7.58657	6.76446	7.55945	6.15752	9.16375	8.28311
APAF1	APAF1	APAF1	chr12:99039077-100378432	IPF	CTRL	OK	10.1548	8.81414	0.204264	1.1521	-0.142522	0.7401	0.854556	no	IPF vs CONTROL UP	unique	9.68806	11.1157	6.75991	14.183	8.71631	10.4656	8.50617	9.67931	8.53804	9.00612	8.34108
APBA1	APBA1	APBA1	chr9:72042448-72287275	IPF	CTRL	OK	2.53304	2.00561	0.336825	1.26297	-0.109497	0.79825	0.892835	no	IPF vs CONTROL UP	unique	2.8003	2.894	1.83555	2.28673	2.58696	2.79469	2.24468	1.65725	2.15727	1.74897	2.2199
APBA2	APBA2	APBA2	chr15:29213839-29410516	IPF	CTRL	OK	3.4021	1.95347	0.800387	1.74157	-0.573921	0.17335	0.337542	no	IPF vs CONTROL UP	unique	2.7974	3.27605	1.50905	7.69924	2.53854	2.5923	1.64206	1.41241	2.15469	2.15033	2.40785
APBA3	APBA3	APBA3	chr19:3708334-3761673	IPF	CTRL	OK	6.58474	5.23384	0.331257	1.25811	-0.188102	0.63395	0.78289	no	IPF vs CONTROL UP	unique	7.36199	6.83004	4.98695	6.27572	7.26333	6.79042	5.74666	6.51792	4.59313	5.11045	4.20104
APBB1	APBB1	APBB1	chr11:6416354-6440644	IPF	CTRL	OK	14.8723	19.3659	-0.380891	-1.30215	1.02054	0.01965	0.066699	no	IPF vs CONTROL DOWN	unique	12.3126	16.9603	13.4786	14.4513	19.7016	12.3292	14.3002	16.9993	19.2883	25.5755	20.666
APBB1IP	APBB1IP	APBB1IP	chr10:26727265-26856732	IPF	CTRL	OK	8.69141	8.3986	0.0494414	1.03486	-0.253048	0.553	0.721008	no	IPF vs CONTROL UP	unique	8.50525	6.53981	9.15423	10.7896	9.86658	7.29299	12.7422	8.38127	7.12456	7.75319	5.99178
APBB2	APBB2	APBB2	chr4:40812043-41216635	IPF	CTRL	OK	16.3358	20.0956	-0.29884	-1.23015	1.0491	0.01275	0.0473638	yes	IPF vs CONTROL DOWN	unique	14.7259	19.5449	14.6446	21.494	11.9958	15.6098	16.3318	19.9043	22.7418	20.6407	20.8594
APBB3	APBB3	APBB3	chr5:139937852-139944189	IPF	CTRL	OK	16.7929	9.81044	0.775457	1.71173	-1.03139	0.0149	0.0535643	no	IPF vs CONTROL UP	unique	15.335	21.3932	9.43455	24.4739	15.3916	14.7289	8.25871	11.9382	10.5297	11.0144	7.31121
APC	APC	APC	chr5:112043201-112181936	IPF	CTRL	OK	10.4093	11.0772	-0.08971	-1.06416	0.600742	0.1588	0.316493	no	IPF vs CONTROL DOWN	unique	9.45303	10.5985	10.7766	12.9515	9.16684	9.50957	12.2625	9.4698	13.228	8.76082	11.6647
APC2	APC2	APC2	chr19:1450147-1479228	IPF	CTRL	OK	1.52673	1.78052	-0.221857	-1.16623	0.498577	0.246	0.428154	no	IPF vs CONTROL DOWN	unique	1.66633	1.77073	1.43645	1.47445	1.42903	1.38337	0.969211	2.10791	1.55123	1.65421	2.62004
APCDD1	APCDD1	APCDD1	chr18:10454624-10488698	IPF	CTRL	OK	24.1184	9.46467	1.34951	2.54826	-2.15205	5e-05	0.000459061	yes	IPF vs CONTROL UP	unique	31.6477	28.127	27.6811	14.6143	21.8055	20.8348	9.30144	8.28288	6.79471	11.3557	11.5886
APCDD1L	APCDD1L	APCDD1L	chr20:57034425-57089949	IPF	CTRL	NOTEST	1.12273	1.0751	0.062548	1.04431	0	1	1	no	IPF vs CONTROL UP	unique	1.30146	1.48182	0.622946	1.42731	0.718362	1.1845	0.477555	1.35285	1.074	1.22621	1.24487
APCDD1L-AS1	APCDD1L-AS1	APCDD1L-AS1	chr20:57090434-57194948	IPF	CTRL	NOTEST	0.0855063	0.096279	-0.17119	-1.12599	0	1	1	no	IPF vs CONTROL DOWN	unique	0	0	0	0.392215	0.120823	0	0.144554	0	0	0.148467	0.188374
APCS	APCS	APCS	chr1:159557615-159558661	IPF	CTRL	NOTEST	0	0	0	1	0	1	1	no	IPF vs. CONTROL EQUAL(0)	unique	0	0	0	0	0	0	0	0	0	0	0
APEH	APEH	APEH	chr3:49711434-49720934	IPF	CTRL	OK	11.5786	12.6463	-0.127252	-1.09221	0.428383	0.31795	0.510777	no	IPF vs CONTROL DOWN	unique	13.1755	9.60092	10.0834	9.56128	15.2077	11.8431	14.2163	12.2708	9.53855	15.6302	11.5758
APEX1	APEX1	APEX1	chr14:20923289-20925931	IPF	CTRL	OK	34.4395	26.3803	0.384605	1.3055	-0.402794	0.3463	0.539167	no	IPF vs CONTROL UP	unique	31.4518	28.6807	31.7029	44.4194	33.8675	36.5146	28.758	24.2267	22.9188	30.6162	25.3816
APEX2	APEX2	APEX2	chrX:55026755-55034306	IPF	CTRL	OK	7.1633	5.96799	0.263379	1.20029	0.102542	0.8115	0.90054	no	IPF vs CONTROL UP	unique	10.0677	7.05411	5.48914	6.08655	8.25318	6.02911	6.50827	6.91793	4.92598	5.64518	5.84258
APH1A	APH1A	APH1A	chr1:150237798-150241609	IPF	CTRL	OK	43.9415	65.2371	-0.570106	-1.48463	1.69534	5e-05	0.000459061	yes	IPF vs CONTROL DOWN	unique	48.0102	42.3069	46.8687	32.5838	47.5598	46.3199	52.7536	74.266	55.9745	84.4476	58.7436
APH1B	APH1B	APH1B	chr15:63569748-63601325	IPF	CTRL	OK	11.3908	8.14475	0.483922	1.39854	-0.441654	0.29765	0.488368	no	IPF vs CONTROL UP	unique	12.5045	10.1058	10.5105	9.44142	14.0318	11.7505	9.19181	8.02758	8.00336	6.9478	8.55318
API5	API5	API5	chr11:43333504-43366080	IPF	CTRL	OK	21.1761	16.363	0.372	1.29415	-0.207936	0.62865	0.779969	no	IPF vs CONTROL UP	unique	22.6223	18.5429	20.0683	19.6651	21.4065	24.7514	17.1655	16.3637	17.6345	14.5514	16.0998
APIP	APIP	APIP	chr11:34903842-35017675	IPF	CTRL	OK	3.71322	4.70871	-0.342663	-1.2681	0.378456	0.39075	0.581481	no	IPF vs CONTROL DOWN	unique	5.05573	4.66535	3.5595	2.37406	4.93238	1.69228	8.223	3.03593	4.6199	4.46268	3.20205
APITD1	APITD1,APITD1-CORT	APITD1,APITD1-CORT	chr1:10490158-10512060	IPF	CTRL	OK	3.42819	3.14807	0.122981	1.08898	-0.0306799	0.9405	0.969645	no	IPF vs CONTROL UP	unique	3.54948	3.10002	2.97012	0.678509	7.95775	2.31329	3.51949	1.97754	2.84993	3.35434	4.03906
APITD1-CORT	APITD1-CORT	APITD1-CORT	chr1:10490158-10512060	IPF	CTRL	NOTEST	1.35795	0.0956506	3.82751	14.197	0	1	1	no	IPF vs CONTROL UP	unique	0.970303	1.41159	0.000154857	1.92693	2.2015	1.63721	0.373477	0.000759431	8.12327e-06	2.34466e-05	0.103985
APLF	APLF	APLF	chr2:68694690-68807294	IPF	CTRL	OK	3.29846	2.3335	0.4993	1.41353	-0.104947	0.8047	0.896267	no	IPF vs CONTROL UP	unique	3.28336	3.22857	4.27179	2.91719	2.11365	3.97621	2.14613	2.40477	2.6584	1.81062	2.64756
APLN	APLN	APLN	chrX:128779235-128788933	IPF	CTRL	OK	0.603751	13.0793	-4.43719	-21.6635	4.75992	5e-05	0.000459061	yes	IPF vs CONTROL DOWN	unique	0.896145	0.408132	0.109179	2.00144	0	0.20761	6.6749	8.84963	21.4834	8.88863	19.5001
APLNR	APLNR	APLNR	chr11:57001051-57004927	IPF	CTRL	OK	8.53701	13.9772	-0.711275	-1.63725	1.63545	0.0001	0.000852984	yes	IPF vs CONTROL DOWN	unique	4.44519	11.3021	8.9785	5.31592	6.67693	14.5034	9.18873	23.6442	2.99605	19.7737	14.2834
APLP1	APLP1	APLP1	chr19:36359400-36370699	IPF	CTRL	NOTEST	0.376751	1.02865	-1.44907	-2.73032	0	1	1	no	IPF vs CONTROL DOWN	unique	0.835618	0.271836	0.363776	0	0.512729	0.276549	0.674828	1.86113	0.804412	1.32318	0.479709
APLP2	APLP2	APLP2	chr11:129939715-130014706	IPF	CTRL	OK	119.169	248.738	-1.06162	-2.08727	2.1814	5e-05	0.000459061	yes	IPF vs CONTROL DOWN	unique	116.926	82.5534	179.31	87.4787	109.152	139.593	230.445	272.655	248.181	253.808	238.6
APMAP	APMAP	APMAP	chr20:24943579-24973425	IPF	CTRL	OK	28.9064	30.4669	-0.0758538	-1.05398	0.571321	0.17965	0.345809	no	IPF vs CONTROL DOWN	unique	32.0065	28.3106	30.3153	26.568	26.3646	29.8734	34.3311	33.1281	23.5527	34.213	27.1096
APOA1	APOA1	APOA1	chr11:116706468-116708338	IPF	CTRL	NOTEST	0.219259	0.447534	-1.02936	-2.04112	0	1	1	no	IPF vs CONTROL DOWN	unique	0.355677	0	0.65301	0	0.306865	0	0.825443	0.369372	0	0.565182	0.477674
APOA1BP	APOA1BP	APOA1BP	chr1:156561557-156564091	IPF	CTRL	OK	13.1057	19.0219	-0.537465	-1.45142	0.978143	0.02455	0.079315	no	IPF vs CONTROL DOWN	unique	14.9375	7.8743	13.8625	8.85664	16.4435	16.6598	18.8802	22.7008	12.5073	20.0496	20.9715
APOA2	APOA2	APOA2	chr1:161192082-161193418	IPF	CTRL	NOTEST	0.905937	1.22609	-0.436581	-1.35339	0	1	1	no	IPF vs CONTROL DOWN	unique	0.774848	1.76483	0.477696	1.07084	1.34741	0	0.804247	1.60695	3.71925	0	0
APOA4	APOA4	APOA4	chr11:116691417-116694011	IPF	CTRL	NOTEST	0	0	0	1	0	1	1	no	IPF vs. CONTROL EQUAL(0)	unique	0	0	0	0	0	0	0	0	0	0	0
APOA5	APOA5	APOA5	chr11:116660085-116663136	IPF	CTRL	NOTEST	0.0380096	0.0287782	0.401386	1.32078	0	1	1	no	IPF vs CONTROL UP	unique	0	0	0.0946505	0	0.133407	0	0.0399031	0	0	0	0.103988
APOB	APOB	APOB	chr2:21224300-21266945	IPF	CTRL	NOTEST	0.122702	0.10984	0.159751	1.11709	0	1	1	no	IPF vs CONTROL UP	unique	0.159209	0.0906339	0.133191	0.0834233	0.0853228	0.184429	0.117442	0.0827693	0.076664	0.125866	0.146458
APOBEC1	APOBEC1	APOBEC1	chr12:7801995-7818502	IPF	CTRL	NOTEST	0	0	0	1	0	1	1	no	IPF vs. CONTROL EQUAL(0)	unique	0	0	0	0	0	0	0	0	0	0	0
APOBEC2	APOBEC2	APOBEC2	chr6:41020939-41032630	IPF	CTRL	OK	3.29525	1.83327	0.845969	1.79747	-0.676159	0.12255	0.26196	no	IPF vs CONTROL UP	unique	4.03278	2.92204	3.80275	2.29972	2.68008	4.03411	1.79159	2.09533	1.76415	1.54954	1.96573
APOBEC3A	APOBEC3A	APOBEC3A	chr22:39353526-39388784	IPF	CTRL	OK	0.838324	3.32017	-1.98568	-3.96049	1.45072	0.0056	0.0243917	yes	IPF vs CONTROL DOWN	unique	2.79923e-62	2.73462	0.477068	0.91255	0.496834	0.408871	2.96448	5.01152	5.4719	2.8602	0.29276
APOBEC3A_B	APOBEC3A_B	APOBEC3A_B	chr22:39353526-39388784	IPF	CTRL	NOTEST	0.264097	0.237424	0.153604	1.11234	0	1	1	no	IPF vs CONTROL UP	unique	0.569703	1.05288e-103	0.350618	2.04969e-58	0.409403	0.25486	3.00282e-28	2.15279e-153	6.05159e-121	1.18712	2.43759e-25
APOBEC3B	APOBEC3B	APOBEC3B	chr22:39353526-39388784	IPF	CTRL	NOTEST	0.962603	0.450952	1.09397	2.1346	0	1	1	no	IPF vs CONTROL UP	unique	1.64752	1.1758	0.30056	1.43898	0.829604	0.383154	0.805566	0.643795	0.39749	0.130998	0.276912
APOBEC3C	APOBEC3C	APOBEC3C	chr22:39410264-39414825	IPF	CTRL	OK	10.0951	9.08309	0.152395	1.11141	0.0866445	0.83635	0.914924	no	IPF vs CONTROL UP	unique	11.4781	8.28797	12.1482	8.57324	12.3011	7.78179	9.15774	11.6325	6.7329	9.6277	8.26461
APOBEC3D	APOBEC3D	APOBEC3D	chr22:39417117-39429256	IPF	CTRL	OK	4.96222	2.50269	0.987504	1.98275	-1.00832	0.01945	0.0660794	no	IPF vs CONTROL UP	unique	3.73284	6.10962	3.34134	7.81275	3.50707	5.26971	1.61855	3.39491	2.24593	2.83218	2.4219
APOBEC3F	APOBEC3F	APOBEC3F	chr22:39436672-39451975	IPF	CTRL	OK	6.33846	3.81735	0.731563	1.66044	-0.651439	0.11185	0.245035	no	IPF vs CONTROL UP	unique	4.84655	5.2277	4.67757	9.27931	5.77838	8.22126	3.25474	3.35607	4.10171	3.5281	4.84611
APOBEC3G	APOBEC3G	APOBEC3G	chr22:39473009-39483748	IPF	CTRL	OK	8.91238	4.68245	0.928548	1.90336	-0.957654	0.02295	0.0753673	no	IPF vs CONTROL UP	unique	8.26215	7.00937	8.89286	12.4243	9.19209	7.69352	5.54001	5.38745	4.9896	4.02147	3.47371
APOBEC3H	APOBEC3H	APOBEC3H	chr22:39493228-39500072	IPF	CTRL	OK	1.99489	1.03129	0.951862	1.93437	-0.750715	0.05075	0.135832	no	IPF vs CONTROL UP	unique	1.19389	0.679627	1.09559	4.97485	0.911416	3.11396	0.462	1.55084	1.43618	1.10657	0.600845
APOBEC4	APOBEC4	APOBEC4	chr1:183605207-183897666	IPF	CTRL	OK	6.32414	2.598	1.28347	2.43424	-0.571796	0.2689	0.454995	no	IPF vs CONTROL UP	unique	4.07991	5.12176	2.16724	3.64986	16.2613	6.66477	2.09627	1.08739	3.02138	1.60096	5.18399
APOBR	APOBR	APOBR	chr16:28505969-28510291	IPF	CTRL	OK	4.50569	7.88132	-0.80669	-1.74919	1.61967	0.0003	0.00220617	yes	IPF vs CONTROL DOWN	unique	4.8498	4.74534	4.38422	5.28989	3.90262	3.86226	10.7414	7.64117	6.78543	8.3541	5.88451
APOC1	APOC1	APOC1	chr19:45417920-45422606	IPF	CTRL	OK	32.3851	74.4357	-1.20066	-2.29846	2.02846	5e-05	0.000459061	yes	IPF vs CONTROL DOWN	unique	51.3014	23.7347	69.712	22.1473	20.9189	6.49634	197.679	46.5426	58.4767	50.0072	19.4731
APOC1P1	APOC1P1	APOC1P1	chr19:45430059-45434643	IPF	CTRL	NOTEST	0.31152	0.0278416	3.48401	11.189	0	1	1	no	IPF vs CONTROL UP	unique	0	0	0	1.49324	0.375883	0	0.139208	0	0	0	0
APOC2	APOC2	APOC2	chr19:45445494-45452822	IPF	CTRL	OK	1.48745	3.29534	-1.14759	-2.21543	0.602471	0.1862	0.354231	no	IPF vs CONTROL DOWN	unique	0.0101633	4.59442	0.0122465	2.08783	1.1715	1.04853	8.34016	2.3499	2.99309	1.27195	1.52162
APOC3	APOC3	APOC3	chr11:116700623-116703787	IPF	CTRL	NOTEST	0	0	0	1	0	1	1	no	IPF vs. CONTROL EQUAL(0)	unique	0	0	0	0	0	0	0	0	0	0	0
APOC4	APOC4	APOC4	chr19:45445494-45452822	IPF	CTRL	NOTEST	0.56608	0.11531	2.29549	4.9092	0	1	1	no	IPF vs CONTROL UP	unique	0.686599	0.698435	4.10504e-49	0	0.0814532	1.92999	1.20114e-05	0.576538	0	0	0
APOC4-APOC2	APOC4-APOC2	APOC4-APOC2	chr19:45445494-45452822	IPF	CTRL	NOTEST	0.589886	0.217315	1.44065	2.71442	0	1	1	no	IPF vs CONTROL UP	unique	0.445458	0.551962	1.08571	1.05994	0.396236	8.27703e-06	0.194684	6.44787e-06	0.48828	0.403605	8.31033e-07
APOD	APOD	APOD	chr3:195295572-195311076	IPF	CTRL	OK	27.8112	13.5487	1.03752	2.05269	-1.47217	0.00065	0.00419729	yes	IPF vs CONTROL UP	unique	13.7086	18.1067	50.768	7.25185	53.8515	23.1808	20.6896	14.2406	11.0779	15.6651	6.07005
APOE	APOE	APOE	chr19:45409038-45412650	IPF	CTRL	OK	45.2133	62.9072	-0.476476	-1.39134	1.3549	0.00155	0.00865817	yes	IPF vs CONTROL DOWN	unique	61.4104	59.2125	70.411	16.0096	44.5634	19.6732	70.9912	50.4943	112.884	44.2311	35.9354
APOF	APOF	APOF	chr12:56754354-56756583	IPF	CTRL	NOTEST	0.108829	0.164429	-0.595406	-1.5109	0	1	1	no	IPF vs CONTROL DOWN	unique	0	0.201432	0	0.246628	0	0.204912	0.0454972	0.18384	0	0	0.592808
APOH	APOH	APOH	chr17:64208146-64225556	IPF	CTRL	NOTEST	0.0427127	0.484097	-3.50256	-11.3338	0	1	1	no	IPF vs CONTROL DOWN	unique	0.256276	0	0	0	0	0	0.329931	1.59743	0.493126	0	0
APOL1	APOL1	APOL1	chr22:36649116-36663577	IPF	CTRL	OK	15.4182	29.5524	-0.938638	-1.91672	2.4864	5e-05	0.000459061	yes	IPF vs CONTROL DOWN	unique	16.0557	12.7167	15.8128	13.4197	22.3745	12.13	25.0906	30.5031	25.7101	37.6514	28.8068
APOL2	APOL2	APOL2	chr22:36622254-36636000	IPF	CTRL	OK	14.2328	16.3077	-0.196337	-1.14579	0.829958	0.05095	0.136271	no	IPF vs CONTROL DOWN	unique	12.7246	18.2733	10.4094	12.9567	18.0196	13.0131	15.1986	17.039	16.3329	16.1545	16.8136
APOL3	APOL3	APOL3	chr22:36536370-36562225	IPF	CTRL	OK	19.4887	37.4728	-0.943206	-1.9228	2.35456	5e-05	0.000459061	yes	IPF vs CONTROL DOWN	unique	12.0626	20.8375	19.1551	27.6543	19.5579	17.6647	27.8191	48.2695	29.4914	42.528	39.2558
APOL4	APOL4	APOL4	chr22:36585175-36600879	IPF	CTRL	OK	2.89407	4.0501	-0.484858	-1.39945	0.917251	0.0317	0.0958912	no	IPF vs CONTROL DOWN	unique	2.23891	3.16098	3.10958	4.50034	2.38358	1.97102	6.60446	3.44447	5.1722	3.59029	1.43907
APOL5	APOL5	APOL5	chr22:36113918-36125529	IPF	CTRL	NOTEST	0.128832	0	Inf	0	0	1	1	no	IPF vs CONTROL UP (0)	unique	0	0.479559	0	0.293433	0	0	0	0	0	0	0
APOL6	APOL6	APOL6	chr22:36044423-36064456	IPF	CTRL	OK	21.2147	21.5589	-0.0232197	-1.01622	0.580056	0.17275	0.336677	no	IPF vs CONTROL DOWN	unique	18.9355	18.9631	18.2902	23.5806	27.6133	19.9057	24.9799	22.7233	20.4847	22.4538	17.153
APOLD1	APOLD1	APOLD1	chr12:12878850-12944399	IPF	CTRL	OK	13.0187	23.7168	-0.865321	-1.82175	2.15143	5e-05	0.000459061	yes	IPF vs CONTROL DOWN	unique	14.3944	15.9688	25.6184	6.7003	9.65871	5.77179	23.3421	4.79627	34.4137	29.1053	26.9267
APOM	APOM	APOM	chr6_ssto_hap7:2937601-2956785	IPF	CTRL	NOTEST	0.160899	0.111128	0.533934	1.44787	0	1	1	no	IPF vs CONTROL UP	multiple	0	0.232061	0.150694	0.0853903	0.212459	0.284787	0.0952246	0.0638289	0.0591051	0.108621	0.228859
APOO	APOO	APOO	chrX:23851464-23926057	IPF	CTRL	OK	2.60266	0.934294	1.47804	2.78569	-0.509552	0.24395	0.425809	no	IPF vs CONTROL UP	unique	2.47004	2.22699	2.68349	0.764103	5.88186	1.58946	1.33758	0.855275	0.792058	0.580777	1.10578
APOOL	APOOL	APOOL	chrX:84258897-84363974	IPF	CTRL	OK	6.49058	6.16847	0.0734345	1.05222	0.304754	0.4729	0.654602	no	IPF vs CONTROL UP	unique	6.71284	5.94454	7.77127	5.57689	5.72093	7.21703	5.29281	7.11597	6.50647	5.20344	6.72368
APOPT1	APOPT1	APOPT1	chr14:104029298-104057236	IPF	CTRL	OK	5.78251	6.29651	-0.122856	-1.08889	0.481785	0.2519	0.434925	no	IPF vs CONTROL DOWN	unique	5.9642	6.22513	6.5274	5.88337	5.77752	4.31742	6.84574	4.13082	6.21654	7.62237	6.66706
APP	APP	APP	chr21:27252860-27543446	IPF	CTRL	OK	88.9314	160.708	-0.853681	-1.80711	2.01485	5e-05	0.000459061	yes	IPF vs CONTROL DOWN	unique	99.1005	72.8292	116.903	49.0279	110.994	84.7338	147.695	150.382	154.618	178.852	171.995
APPBP2	APPBP2	APPBP2	chr17:58520519-58603580	IPF	CTRL	OK	14.9363	13.5066	0.145157	1.10585	0.184587	0.6636	0.80423	no	IPF vs CONTROL UP	unique	14.1693	14.0848	14.3385	15.6864	14.1119	17.2267	14.0857	14.1841	13.2643	12.9058	13.093
APPL1	APPL1	APPL1	chr3:57261764-57326710	IPF	CTRL	OK	17.5735	14.53	0.274374	1.20947	-0.169555	0.68435	0.817797	no	IPF vs CONTROL UP	unique	15.8446	13.9837	18.947	14.1428	21.0193	21.5038	16.6771	15.1024	13.7624	14.3083	12.7996
APPL2	APPL2	APPL2	chr12:105567074-105630008	IPF	CTRL	OK	19.4613	12.1862	0.675356	1.59699	-0.903443	0.035	0.102994	no	IPF vs CONTROL UP	unique	14.9003	21.3304	12.552	19.5919	28.1192	20.274	14.5291	8.99374	12.7539	9.5886	15.0658
APRT	APRT	APRT	chr16:88875876-88878342	IPF	CTRL	OK	26.6516	31.043	-0.220046	-1.16477	0.549165	0.2017	0.374685	no	IPF vs CONTROL DOWN	unique	33.083	18.2236	27.8988	20.1009	42.331	18.2723	38.6276	26.4116	25.0878	37.2824	27.8056
APTX	APTX	APTX	chr9:32972603-33001639	IPF	CTRL	OK	12.9817	8.22048	0.659187	1.57919	-0.801569	0.05695	0.148543	no	IPF vs CONTROL UP	unique	11.276	10.8628	7.68846	17.2387	17.1103	13.714	9.51379	7.22039	6.99909	9.34582	8.02329
AQP1	AQP1	AQP1	chr7:30951414-30965131	IPF	CTRL	OK	209.708	377.321	-0.847411	-1.79927	1.60667	0.00035	0.00252483	yes	IPF vs CONTROL DOWN	unique	292.24	123.368	380.107	137.563	131.572	193.398	268.128	420.561	391.789	520.362	285.766
AQP10	AQP10	AQP10	chr1:154293591-154297801	IPF	CTRL	NOTEST	0.493629	0.26427	0.901411	1.86789	0	1	1	no	IPF vs CONTROL UP	unique	0.33231	0.189185	0.202699	0.231671	1.42854	0.577367	0.128173	0.17267	0.159918	0.526569	0.334022
AQP11	AQP11	AQP11	chr11:77300679-77321401	IPF	CTRL	OK	4.30386	1.70115	1.33912	2.52997	-1.33492	0.00375	0.0177861	yes	IPF vs CONTROL UP	unique	4.78336	4.51265	3.83272	5.71915	2.70108	4.2742	1.51045	2.4147	0.920877	1.37094	2.28878
AQP12A	AQP12A	AQP12A	chr2:241631261-241637900	IPF	CTRL	NOTEST	0	0	0	1	0	1	1	no	IPF vs. CONTROL EQUAL(0)	unique	0	0	0	0	0	0	0	0	0	0	0
AQP12B	AQP12B	AQP12B	chr2:241615834-241622317	IPF	CTRL	NOTEST	0	0	0	1	0	1	1	no	IPF vs. CONTROL EQUAL(0)	unique	0	0	0	0	0	0	0	0	0	0	0
AQP2	AQP2	AQP2	chr12:50344523-50352664	IPF	CTRL	NOTEST	0.397637	0.136802	1.53936	2.90666	0	1	1	no	IPF vs CONTROL UP	unique	0.685652	0.0780662	0.167007	0.287213	0.294224	0.873662	0.228865	0.0712786	0	0.10849	0.275378
AQP3	AQP3	AQP3	chr9:33441151-33447631	IPF	CTRL	OK	64.9382	67.8979	-0.0642976	-1.04558	0.493455	0.2461	0.428181	no	IPF vs CONTROL DOWN	unique	127.984	46.0464	78.83	36.7112	44.5812	55.4767	108.422	39.7206	34.1925	83.0879	74.0663
AQP4	AQP4	AQP4	chr18:24432007-24765302	IPF	CTRL	OK	33.3314	69.9044	-1.0685	-2.09725	2.01559	0.00045	0.00310007	yes	IPF vs CONTROL DOWN	unique	30.185	4.62586	53.8653	50.9863	19.1974	41.1285	81.6359	66.3499	66.5984	68.3188	66.619
AQP4-AS1	AQP4-AS1	AQP4-AS1	chr18:24432007-24765302	IPF	CTRL	OK	3.53656	0.891327	1.98832	3.96775	-0.331825	0.2871	0.475747	no	IPF vs CONTROL UP	unique	2.81367	3.90005	1.49125	1.36544	6.8311	4.81787	1.41461	0	0.588818	0.322868	2.13034
AQP5	AQP5	AQP5	chr12:50355278-50359465	IPF	CTRL	OK	13.579	5.21444	1.38079	2.6041	-1.77889	5e-05	0.000459061	yes	IPF vs CONTROL UP	unique	25.4053	9.27135	8.14511	8.62906	15.1209	14.902	4.22925	2.53864	2.97814	8.68743	7.63876
AQP6	AQP6	AQP6	chr12:50366619-50370922	IPF	CTRL	NOTEST	0.641538	0.086074	2.89789	7.45333	0	1	1	no	IPF vs CONTROL UP	unique	1.09719	0	0.267437	1.37797	0.471175	0.635456	0.225512	0	0	0.057904	0.146954
AQP7	AQP7	AQP7	chr9:33384947-33402517	IPF	CTRL	NOTEST	1.3607	1.03814	0.390351	1.31071	0	1	1	no	IPF vs CONTROL UP	unique	0.975767	1.66656	0.893992	0.339743	2.31036	1.97778	2.51196	1.01374	0.469417	1.03197	0.163605
AQP7P1	AQP7P1	AQP7P1	chr9:67270214-67289492	IPF	CTRL	NOTEST	0.468475	0.691334	-0.561411	-1.47571	0	1	1	no	IPF vs CONTROL DOWN	unique	0.272701	0.206994	0.664485	1.01506	0.546317	0.105294	0.607037	1.03939	0.875161	0.143878	0.791205
AQP7P3	AQP7P3	AQP7P3	chr9:42844369-42893137	IPF	CTRL	NOTEST	0.12939	0	Inf	0	0	1	1	no	IPF vs CONTROL UP (0)	unique	0	0	0	0	0	0.776339	0	0	0	0	0
AQP8	AQP8	AQP8	chr16:25228284-25240253	IPF	CTRL	NOTEST	0.0442785	0.0120112	1.88222	3.68642	0	1	1	no	IPF vs CONTROL UP	unique	0	0.265671	0	0	0	0	0.0600562	0	0	0	0
AQP9	AQP9	AQP9	chr15:58430407-58478110	IPF	CTRL	OK	3.68119	6.69455	-0.862816	-1.81858	1.60625	0.0005	0.00338298	yes	IPF vs CONTROL DOWN	unique	4.41005	3.71132	5.2566	3.7467	2.96353	1.99893	14.8003	5.58068	5.26108	5.96908	1.86161
AQPEP	AQPEP	AQPEP	chr5:115298150-115363299	IPF	CTRL	NOTEST	0.44508	0.0896596	2.31154	4.96411	0	1	1	no	IPF vs CONTROL UP	unique	0.432895	0.211234	0.263574	0.69087	0.212273	0.859637	0.142895	0	0.0595472	0.16307	0.082786
AQR	AQR	AQR	chr15:35148551-35261995	IPF	CTRL	OK	10.6335	7.67528	0.470318	1.38542	-0.494192	0.24195	0.423518	no	IPF vs CONTROL UP	unique	9.26096	11.5667	10.9345	13.7957	9.92076	8.32211	11.4405	7.29386	7.56637	6.21549	5.8602
AR	AR	AR	chrX:66763873-66950461	IPF	CTRL	OK	4.28695	5.33703	-0.316087	-1.24495	1.01364	0.01715	0.0598906	no	IPF vs CONTROL DOWN	unique	3.71611	3.31161	4.33137	2.40133	6.20271	5.75857	4.22725	5.69306	6.04817	4.63078	6.08591
ARAF	ARAF	ARAF	chrX:47420498-47479256	IPF	CTRL	OK	22.8011	22.865	-0.00403412	-1.0028	0.220163	0.5938	0.753708	no	IPF vs CONTROL DOWN	unique	19.566	20.6954	19.9068	29.9642	22.7971	23.8773	21.9488	26.1526	18.5663	25.5912	22.066
ARAP1	ARAP1	ARAP1	chr11:72396113-72463434	IPF	CTRL	OK	47.7357	53.5254	-0.165155	-1.12129	0.759753	0.0738	0.181199	no	IPF vs CONTROL DOWN	unique	48.8746	50.8938	41.6766	48.8882	55.142	40.939	58.6648	53.5538	43.2197	64.196	47.9927
ARAP2	ARAP2	ARAP2	chr4:36067619-36245979	IPF	CTRL	OK	20.1171	21.9997	-0.129064	-1.09358	0.606814	0.1574	0.314281	no	IPF vs CONTROL DOWN	unique	14.5754	16.4198	16.2671	34.597	19.3306	19.5125	19.4243	21.4314	28.6644	20.4571	20.0213
ARAP3	ARAP3	ARAP3	chr5:141032967-141061800	IPF	CTRL	OK	10.0812	22.1387	-1.1349	-2.19603	2.48215	5e-05	0.000459061	yes	IPF vs CONTROL DOWN	unique	11.5866	10.4797	8.56994	10.9643	9.291	9.59591	18.9582	24.2604	20.02	25.4956	21.9594
ARC	ARC	ARC	chr8:143692404-143695833	IPF	CTRL	OK	0.317527	6.62873	-4.38378	-20.8761	4.12721	5e-05	0.000459061	yes	IPF vs CONTROL DOWN	unique	0.688377	0.111968	0.53922	0	0.337776	0.227822	4.95119	3.06661	8.23677	10.8969	5.9922
ARCN1	ARCN1	ARCN1	chr11:118443101-118473747	IPF	CTRL	OK	39.1384	40.1191	-0.0357049	-1.02506	0.4424	0.30025	0.491091	no	IPF vs CONTROL DOWN	unique	41.5409	35.1424	48.7735	27.9322	38.6076	42.8335	39.9384	45.6786	40.7407	34.9716	39.266
AREG	AREG	AREG	chr4:75480628-75490485	IPF	CTRL	NOTEST	0.170928	0.728754	-2.09204	-4.26351	0	1	1	no	IPF vs CONTROL DOWN	multiple	0.495692	0	0.529877	0	0	0	0.701885	0	1.31153	1.04855	0.581808
ARF1	ARF1	ARF1	chr1:228270360-228286913	IPF	CTRL	OK	119.712	163.166	-0.446769	-1.36298	1.424	0.0011	0.00648906	yes	IPF vs CONTROL DOWN	unique	134.88	98.0637	148.058	85.4586	130.855	120.957	159.267	163.26	163.506	167.635	162.16
ARF3	ARF3	ARF3	chr12:49329991-49351252	IPF	CTRL	OK	57.7738	72.675	-0.331043	-1.25792	1.1835	0.00575	0.0248734	yes	IPF vs CONTROL DOWN	unique	61.3107	51.1732	63.8245	43.9896	61.9272	64.4178	59.134	89.1263	65.5373	83.4566	66.1208
ARF4	ARF4	ARF4	chr3:57557089-57583215	IPF	CTRL	OK	72.4857	51.3013	0.498701	1.41294	-0.463946	0.26555	0.451545	no	IPF vs CONTROL UP	unique	82.7688	69.6565	75.8932	55.9063	78.2412	72.4483	56.9349	46.4789	52.6121	47.885	52.5957
ARF5	ARF5	ARF5	chr7:127228405-127231759	IPF	CTRL	OK	42.8903	46.8067	-0.126064	-1.09131	0.603729	0.1463	0.297091	no	IPF vs CONTROL DOWN	unique	51.0582	38.4352	42.824	35.5343	44.4817	45.0085	44.4972	46.5554	41.7497	54.031	47.2004
ARF6	ARF6	ARF6	chr14:50359735-50363772	IPF	CTRL	OK	31.5718	36.8499	-0.223026	-1.16718	1.06156	0.01225	0.0459117	yes	IPF vs CONTROL DOWN	unique	32.8627	26.0506	32.7481	29.5037	30.9579	37.3075	31.2467	40.4499	41.043	34.9752	36.5346
ARFGAP1	ARFGAP1	ARFGAP1	chr20:61904164-61921142	IPF	CTRL	OK	36.3637	25.5158	0.511109	1.42514	-0.550979	0.19715	0.368674	no	IPF vs CONTROL UP	unique	42.0363	45.2306	20.1928	45.528	32.0462	33.1482	20.8349	23.5574	27.1237	30.4769	25.586
ARFGAP2	ARFGAP2	ARFGAP2	chr11:46958250-47198676	IPF	CTRL	OK	32.9807	32.7756	0.00899822	1.00626	0.326374	0.4446	0.6307	no	IPF vs CONTROL UP	unique	30.8039	35.3915	27.1145	34.0305	34.0689	36.4748	31.8552	39.1826	24.6357	38.3306	29.874
ARFGAP3	ARFGAP3	ARFGAP3	chr22:43192531-43253408	IPF	CTRL	OK	22.9943	15.6099	0.558816	1.47306	-0.621242	0.1485	0.300391	no	IPF vs CONTROL UP	unique	21.8661	22.6403	22.982	20.0265	26.2304	24.2204	17.2467	12.146	23.9786	12.8728	11.8053
ARFGEF1	ARFGEF1	ARFGEF1	chr8:68109883-68255912	IPF	CTRL	OK	24.2087	17.5139	0.467025	1.38226	-0.629995	0.1358	0.281389	no	IPF vs CONTROL UP	unique	23.3231	24.7249	22.2587	29.8422	21.8551	23.2485	20.1106	17.1167	18.0433	17.4003	14.8988
ARFGEF2	ARFGEF2	ARFGEF2	chr20:47538274-47653230	IPF	CTRL	OK	16.9932	13.083	0.377261	1.29887	-0.552611	0.18895	0.357577	no	IPF vs CONTROL UP	unique	14.6114	18.9921	16.3332	16.8211	18.4207	16.7806	15.4973	13.2683	11.6252	12.793	12.2313
ARFIP1	ARFIP1	ARFIP1	chr4:153701111-153833063	IPF	CTRL	OK	14.6737	10.6305	0.465017	1.38033	-0.58385	0.1671	0.328071	no	IPF vs CONTROL UP	unique	14.1162	12.8936	14.9112	16.6223	15.9543	13.5446	12.4675	11.6996	9.10677	9.97107	9.9078
ARFIP2	ARFIP2	ARFIP2	chr11:6495912-6505911	IPF	CTRL	OK	9.19735	8.19548	0.166391	1.12225	0.0672424	0.8765	0.93678	no	IPF vs CONTROL UP	unique	9.42864	10.8231	7.95872	9.08541	10.1019	7.78636	8.47729	6.63528	6.68584	9.93575	9.24324
ARFRP1	ARFRP1	ARFRP1	chr20:62289162-62367494	IPF	CTRL	OK	21.1305	22.7841	-0.1087	-1.07826	0.395637	0.35795	0.551076	no	IPF vs CONTROL DOWN	unique	23.0847	21.8133	19.7928	18.2604	20.6548	23.1773	14.3907	25.9524	25.2036	21.4965	26.8775
ARG1	ARG1	ARG1	chr6:131894343-131949379	IPF	CTRL	NOTEST	1.86833	0.586787	1.67084	3.184	0	1	1	no	IPF vs CONTROL UP	unique	1.43603	1.86869	1.50267	2.85881	2.11812	1.42566	0.475039	0.213051	0.987036	0.43365	0.825157
ARG2	ARG2	ARG2	chr14:68086578-68141602	IPF	CTRL	OK	7.01478	6.69084	0.0682117	1.04842	0.173318	0.69365	0.824036	no	IPF vs CONTROL UP	unique	8.20954	4.42457	5.82628	6.39302	6.16348	11.0718	8.98383	5.84251	6.52224	5.23298	6.87262
ARGFX	ARGFX	ARGFX	chr3:121286777-121309469	IPF	CTRL	NOTEST	0.0377613	0.00753584	2.32507	5.0109	0	1	1	no	IPF vs CONTROL UP	unique	0	0.192294	0.0342739	0	0	0	0	0	0	0	0.0376792
ARGFXP2	ARGFXP2	ARGFXP2	chr17:30469472-30552746	IPF	CTRL	OK	7.66952	4.96957	0.626016	1.5433	-0.238082	0.59685	0.755804	no	IPF vs CONTROL UP	unique	7.66713	4.36504	4.684	14.2352	3.52147	11.5443	4.07985	7.6997	2.95062	4.46059	5.65709
ARGLU1	ARGLU1	ARGLU1	chr13:107195661-107220514	IPF	CTRL	OK	123.228	96.7507	0.34899	1.27367	-0.169732	0.6901	0.82201	no	IPF vs CONTROL UP	unique	98.5533	148.843	68.4253	172.053	121.767	129.728	61.804	119.751	98.1289	98.9014	105.168
ARHGAP1	ARHGAP1	ARHGAP1	chr11:46698624-46722215	IPF	CTRL	OK	50.8281	39.4778	0.364584	1.28751	-0.349906	0.4028	0.592544	no	IPF vs CONTROL UP	unique	55.875	53.8085	56.4501	37.4825	37.9857	63.3667	33.4902	41.4755	38.0924	41.435	42.8959
ARHGAP10	ARHGAP10	ARHGAP10	chr4:148653452-148993927	IPF	CTRL	OK	9.42717	9.38539	0.00640754	1.00445	0.165965	0.68905	0.821336	no	IPF vs CONTROL UP	unique	5.87329	9.16795	16.1013	9.65217	5.12439	10.6439	10.6091	10.8317	10.3059	8.64704	6.53321
ARHGAP11A	ARHGAP11A	ARHGAP11A	chr15:32907690-32931868	IPF	CTRL	NOTEST	1.16436	0.55382	1.07205	2.10241	0	1	1	no	IPF vs CONTROL UP	unique	1.16518	0.519117	1.75782	1.48586	0.825811	1.23236	0.585192	0.632021	0.455643	0.587674	0.50857
ARHGAP11B	ARHGAP11B	ARHGAP11B	chr15:30918878-30931013	IPF	CTRL	NOTEST	0.925673	0.170295	2.44246	5.43569	0	1	1	no	IPF vs CONTROL UP	unique	0.308451	1.05366	1.32029	1.71673	0.797669	0.35724	0.317929	0	0	0.326531	0.207017
ARHGAP12	ARHGAP12	ARHGAP12	chr10:32094325-32217804	IPF	CTRL	OK	18.3646	14.5429	0.336607	1.26278	-0.257315	0.5448	0.713634	no	IPF vs CONTROL UP	unique	12.9707	19.4903	16.9445	23.5826	16.1041	21.0951	16.2601	13.6361	14.7845	12.8462	15.1877
ARHGAP15	ARHGAP15	ARHGAP15	chr2:143886898-144525921	IPF	CTRL	OK	13.5803	9.27438	0.550194	1.46428	-0.704128	0.0932	0.215391	no	IPF vs CONTROL UP	unique	8.13051	18.322	12.1924	24.3249	12.2338	6.27831	13.8512	5.80883	11.9009	6.97883	7.83215
ARHGAP17	ARHGAP17	ARHGAP17	chr16:24930711-25026675	IPF	CTRL	OK	18.948	16.0742	0.237296	1.17878	-0.250375	0.55005	0.718585	no	IPF vs CONTROL UP	unique	19.4508	25.5529	14.9258	16.1621	17.2051	20.3914	18.0151	16.8499	16.5921	13.9459	14.9682
ARHGAP18	ARHGAP18	ARHGAP18	chr6:129898239-130031370	IPF	CTRL	OK	23.1546	34.3965	-0.570963	-1.48552	1.43471	0.00065	0.00419729	yes	IPF vs CONTROL DOWN	unique	15.7261	23.5301	16.0979	19.4253	44.8824	19.2656	36.6234	41.5967	29.0934	28.2328	36.436
ARHGAP19	ARHGAP19	ARHGAP19	chr10:98757794-99052430	IPF	CTRL	OK	5.72538	6.24074	-0.124347	-1.09001	0.537292	0.2087	0.383549	no	IPF vs CONTROL DOWN	unique	5.17433	4.57179	7.42495	6.11305	5.07371	5.99445	5.38328	7.5979	5.44008	6.73984	6.04262
ARHGAP19-SLIT1	ARHGAP19-SLIT1	ARHGAP19-SLIT1	chr10:98757794-99052430	IPF	CTRL	NOTEST	3.28468e-154	0.0561648	-505.707	-1.7099e+152	0	1	1	no	IPF vs CONTROL DOWN	unique	0	1.08908e-255	3.14897e-219	2.57557e-242	1.97081e-153	0	7.71846e-154	0.280824	5.09755e-284	1.39698e-146	5.91367e-146
ARHGAP20	ARHGAP20	ARHGAP20	chr11:110447758-110583912	IPF	CTRL	OK	5.12692	5.71347	-0.156275	-1.11441	0.691642	0.10455	0.233328	no	IPF vs CONTROL DOWN	unique	6.36864	5.26993	5.74853	5.69769	2.31969	5.35701	4.36388	6.4115	4.77883	5.31602	7.6971
ARHGAP21	ARHGAP21	ARHGAP21	chr10:24872537-25012597	IPF	CTRL	OK	23.0994	19.3261	0.257304	1.19524	-0.119828	0.7732	0.875819	no	IPF vs CONTROL UP	unique	19.049	29.3379	17.8957	31.7436	19.8315	20.7386	17.1216	18.2846	22.9488	17.6476	20.6279
ARHGAP22	ARHGAP22	ARHGAP22	chr10:49654067-49864310	IPF	CTRL	OK	3.79429	1.25368	1.59766	3.02652	-1.71027	0.00015	0.00122565	yes	IPF vs CONTROL UP	unique	4.25428	3.48708	1.63048	5.49967	3.51184	4.38237	1.39801	1.29301	1.34397	1.31505	0.918362
ARHGAP23	ARHGAP23	ARHGAP23	chr17:36584719-36668628	IPF	CTRL	OK	18.4126	28.1746	-0.613706	-1.53019	1.66102	0.00015	0.00122565	yes	IPF vs CONTROL DOWN	unique	21.0301	21.6428	14.4126	17.8121	14.4501	21.1277	15.8114	29.4188	32.3458	32.2506	31.0466
ARHGAP24	ARHGAP24	ARHGAP24	chr4:86396283-86923823	IPF	CTRL	OK	8.44622	8.8614	-0.0692291	-1.04916	0.55979	0.19	0.359071	no	IPF vs CONTROL DOWN	unique	7.11016	8.85057	7.8356	9.69275	8.78468	8.40354	11.1444	8.03277	8.07758	8.08285	8.96939
ARHGAP25	ARHGAP25	ARHGAP25	chr2:68961912-69053957	IPF	CTRL	OK	10.886	14.2651	-0.39002	-1.31041	1.008	0.0186	0.0639517	no	IPF vs CONTROL DOWN	unique	9.61768	14.2575	8.28545	14.0165	11.245	7.89369	15.1873	17.3292	12.4419	15.7063	10.6608
ARHGAP26	ARHGAP26	ARHGAP26	chr5:142150291-142608572	IPF	CTRL	OK	10.9461	9.49214	0.205612	1.15318	-0.0221106	0.95685	0.978752	no	IPF vs CONTROL UP	unique	10.2752	12.3861	9.38896	14.7093	10.2888	8.62825	10.3594	10.849	8.79183	9.30634	8.15414
ARHGAP26-AS1	ARHGAP26-AS1	ARHGAP26-AS1	chr5:142150291-142608572	IPF	CTRL	OK	2.89026	3.39763	-0.233328	-1.17554	0.135023	0.82485	0.90851	no	IPF vs CONTROL DOWN	unique	2.25915	2.93989	1.57917	6.2855	2.78276	1.49512	6.07218	1.0056	4.65624	2.22121	3.03293
ARHGAP27	ARHGAP27	ARHGAP27	chr17_ctg5_hap1:121842-125407	IPF	CTRL	OK	9.26186	7.67307	0.271498	1.20706	-0.0107965	0.9792	0.990445	no	IPF vs CONTROL UP	multiple	10.277	10.0144	5.76291	14.0393	7.85897	7.6186	5.97795	8.8596	6.5402	8.72206	8.26557
ARHGAP28	ARHGAP28	ARHGAP28	chr18:6834431-6915712	IPF	CTRL	OK	2.91614	3.89779	-0.418596	-1.33663	1.01466	0.018	0.0622704	no	IPF vs CONTROL DOWN	unique	3.34456	2.98781	3.60218	2.94644	1.45683	3.15903	2.90584	3.58413	4.50882	4.15117	4.339
ARHGAP29	ARHGAP29	ARHGAP29	chr1:94634462-94703307	IPF	CTRL	OK	16.3627	24.6337	-0.590222	-1.50548	1.63029	0.00015	0.00122565	yes	IPF vs CONTROL DOWN	unique	16.2548	17.379	15.7701	17.7347	12.7459	18.2916	18.322	31.4186	23.7935	26.701	22.9332
ARHGAP30	ARHGAP30	ARHGAP30	chr1:161016731-161039760	IPF	CTRL	OK	22.9799	20.0418	0.197361	1.1466	-0.0369544	0.9296	0.964475	no	IPF vs CONTROL UP	unique	20.3059	23.9828	21.3659	30.9974	21.9179	19.3093	27.8255	21.4232	18.0989	21.982	10.8792
ARHGAP31	ARHGAP31	ARHGAP31	chr3:119013219-119138323	IPF	CTRL	OK	19.8172	43.3305	-1.12863	-2.18651	2.75402	5e-05	0.000459061	yes	IPF vs CONTROL DOWN	unique	19.3878	18.4881	22.4266	25.1778	16.599	16.8238	36.9218	48.7928	38.2171	43.1701	49.5506
ARHGAP32	ARHGAP32	ARHGAP32	chr11:128834954-129062093	IPF	CTRL	OK	13.0578	8.53145	0.614047	1.53055	-0.923238	0.03145	0.0952682	no	IPF vs CONTROL UP	unique	10.8814	14.1583	7.22479	11.8459	18.9781	15.2582	8.23577	7.74661	8.99227	7.97692	9.70567
ARHGAP33	ARHGAP33	ARHGAP33	chr19:36266416-36279724	IPF	CTRL	OK	8.69763	4.71638	0.882944	1.84413	-1.25061	0.00405	0.0189129	yes	IPF vs CONTROL UP	unique	7.04435	10.7709	5.57155	9.09203	10.6075	9.09947	2.97713	5.11548	4.68017	4.77039	6.03872
ARHGAP35	ARHGAP35	ARHGAP35	chr19:47421932-47508333	IPF	CTRL	OK	28.112	30.0834	-0.0977808	-1.07013	0.649985	0.1229	0.262449	no	IPF vs CONTROL DOWN	unique	30.1811	24.0902	24.8818	35.3294	25.5579	28.6318	25.2818	32.9981	27.1679	32.573	32.3963
ARHGAP36	ARHGAP36	ARHGAP36	chrX:130192215-130223857	IPF	CTRL	NOTEST	0	0.00989222	#NAME?	0	0	1	1	no	IPF vs CONTROL DOWN (0)	unique	0	0	0	0	0	0	0	0	0	0.0494611	0
ARHGAP39	ARHGAP39	ARHGAP39	chr8:145754562-145838888	IPF	CTRL	OK	9.16989	3.51764	1.3823	2.60683	-1.95053	5e-05	0.000459061	yes	IPF vs CONTROL UP	unique	7.26055	7.19385	2.53064	5.41825	25.4896	7.12644	3.54279	1.67099	2.50833	2.48426	7.38181
ARHGAP4	ARHGAP4	ARHGAP4	chrX:153172829-153191714	IPF	CTRL	OK	21.2911	23.9899	-0.172177	-1.12676	0.435736	0.3112	0.50378	no	IPF vs CONTROL DOWN	unique	17.6619	29.4322	11.3604	35.5352	19.9018	13.8551	20.738	30.7735	21.7881	27.5523	19.0976
ARHGAP40	ARHGAP40	ARHGAP40	chr20:37230576-37279295	IPF	CTRL	OK	2.72219	0.494351	2.46116	5.50658	-2.33054	5e-05	0.000459061	yes	IPF vs CONTROL UP	unique	1.63695	7.57171	1.18439	0.99949	3.16294	1.77764	0.367955	0.212691	0.196992	0.323928	1.37019
ARHGAP42	ARHGAP42	ARHGAP42	chr11:100558406-100861656	IPF	CTRL	OK	5.3759	5.83972	-0.119393	-1.08628	0.449527	0.27805	0.465589	no	IPF vs CONTROL DOWN	unique	5.46871	5.26857	4.3175	4.61571	6.80698	5.77792	6.32566	4.99807	6.19166	4.56368	7.11952
ARHGAP44	ARHGAP44	ARHGAP44	chr17:12692828-12921381	IPF	CTRL	OK	10.5872	16.0299	-0.598446	-1.51408	1.10701	0.0112	0.0427162	yes	IPF vs CONTROL DOWN	unique	10.0936	7.20183	10.6125	15.1275	10.5104	9.97731	13.4419	13.5011	15.2261	19.3778	18.6026
ARHGAP5	ARHGAP5	ARHGAP5	chr14:32546494-32628934	IPF	CTRL	OK	25.0002	26.4354	-0.0805336	-1.05741	0.662174	0.12055	0.258634	no	IPF vs CONTROL DOWN	unique	21.8241	22.0722	27.134	25.1208	23.7295	30.1205	27.2342	26.5999	31.5718	19.3538	27.4174
ARHGAP5-AS1	ARHGAP5-AS1	ARHGAP5-AS1	chr14:32544624-32545905	IPF	CTRL	NOTEST	1.44036	1.64387	-0.190667	-1.14129	0	1	1	no	IPF vs CONTROL DOWN	unique	1.43232	1.63088	1.16636	1.66248	1.64413	1.10597	1.10609	0.992061	1.60782	2.27205	2.24131
ARHGAP6	ARHGAP6	ARHGAP6	chrX:11155662-11683821	IPF	CTRL	OK	5.8822	13.5956	-1.20871	-2.31131	2.63767	5e-05	0.000459061	yes	IPF vs CONTROL DOWN	unique	3.98372	7.39195	5.76921	7.01721	4.88963	6.24147	9.97281	15.715	14.2088	14.7419	13.3395
ARHGAP8	ARHGAP8	ARHGAP8	chr22:45064426-45258664	IPF	CTRL	OK	3.35821	3.14976	0.0924524	1.06618	-0.00274878	0.99605	0.998013	no	IPF vs CONTROL UP	unique	3.5477	1.57049	2.88609	6.65235	2.52568	2.96695	5.57561	2.45695	1.32735	3.43639	2.95248
ARHGAP9	ARHGAP9	ARHGAP9	chr12:57853917-57873633	IPF	CTRL	OK	18.4502	10.4746	0.816735	1.76142	-0.99158	0.02385	0.0775663	no	IPF vs CONTROL UP	unique	15.8519	23.6126	10.9628	30.8788	12.7175	16.6775	12.5352	12.3742	9.62251	11.5155	6.32576
ARHGDIA	ARHGDIA	ARHGDIA	chr17:79825596-79829282	IPF	CTRL	OK	66.4834	117.284	-0.818941	-1.76411	2.29201	5e-05	0.000459061	yes	IPF vs CONTROL DOWN	unique	82.13	64.3426	68.5967	59.2815	64.6021	59.9474	89.9733	121.654	127.713	123.505	123.575
ARHGDIB	ARHGDIB	ARHGDIB	chr12:15094949-15114562	IPF	CTRL	OK	89.9806	111.629	-0.311029	-1.24059	1.14827	0.00785	0.0319076	yes	IPF vs CONTROL DOWN	unique	84.1791	81.1698	110.261	85.1891	86.8567	92.2277	124.769	115.553	102.879	105.751	109.194
ARHGDIG	ARHGDIG	ARHGDIG	chr16:330605-333003	IPF	CTRL	NOTEST	0.0903578	0.188457	-1.06052	-2.08568	0	1	1	no	IPF vs CONTROL DOWN	unique	0.336365	0	0.205782	0	0	0	0.086711	0	0	0.178114	0.677462
ARHGEF1	ARHGEF1	ARHGEF1	chr19:42387266-42411604	IPF	CTRL	OK	56.9388	56.4131	0.0133837	1.00932	0.247147	0.56745	0.73341	no	IPF vs CONTROL UP	unique	58.6991	66.6198	47.5519	69.169	53.5071	46.0861	50.6306	61.0453	50.0253	65.5916	54.7725
ARHGEF10	ARHGEF10	ARHGEF10	chr8:1772148-1906807	IPF	CTRL	OK	9.43386	22.6607	-1.26427	-2.40206	2.64799	5e-05	0.000459061	yes	IPF vs CONTROL DOWN	unique	9.2113	12.2839	7.59007	12.794	6.9423	7.78161	18.0277	26.2427	21.2191	24.6877	23.1261
ARHGEF10L	ARHGEF10L	ARHGEF10L	chr1:17866329-18024370	IPF	CTRL	OK	14.0348	10.6922	0.392455	1.31263	-0.505225	0.2429	0.424466	no	IPF vs CONTROL UP	unique	12.0291	20.2786	8.71708	12.8823	13.5655	16.7365	13.08	9.5388	10.1809	13.1039	7.55739
ARHGEF11	ARHGEF11	ARHGEF11	chr1:156904631-157015162	IPF	CTRL	OK	13.8676	15.9479	-0.201652	-1.15001	0.642957	0.13185	0.275998	no	IPF vs CONTROL DOWN	unique	13.443	14.583	12.6944	13.2329	14.9899	14.2622	17.6908	14.804	13.9688	17.5828	15.6931
ARHGEF12	ARHGEF12	ARHGEF12	chr11:120207617-120360645	IPF	CTRL	OK	41.0252	55.2201	-0.428683	-1.346	1.19618	0.0061	0.0262079	yes	IPF vs CONTROL DOWN	unique	40.2335	33.6495	46.213	37.541	41.1381	47.3762	45.8665	61.0327	60.3694	54.2855	54.5465
ARHGEF15	ARHGEF15	ARHGEF15	chr17:8213555-8225834	IPF	CTRL	OK	14.835	26.8868	-0.857892	-1.81239	2.10438	5e-05	0.000459061	yes	IPF vs CONTROL DOWN	unique	13.3612	16.8679	13.8273	20.5893	10.8117	13.5526	18.1968	37.9692	13.9295	39.3565	24.9819
ARHGEF16	ARHGEF16	ARHGEF16	chr1:3371146-3397677	IPF	CTRL	OK	5.34307	4.03078	0.406608	1.32557	-0.154844	0.71925	0.84054	no	IPF vs CONTROL UP	unique	6.09329	4.32185	3.52986	6.13415	7.11956	4.8597	3.15618	2.80345	4.42371	4.95467	4.81591
ARHGEF17	ARHGEF17	ARHGEF17	chr11:73019662-73080425	IPF	CTRL	OK	42.0816	45.6134	-0.116269	-1.08393	0.637124	0.13165	0.275808	no	IPF vs CONTROL DOWN	unique	51.3749	44.7254	27.5646	53.9151	33.7245	41.1849	34.2955	51.6828	45.778	46.38	49.9306
ARHGEF18	ARHGEF18	ARHGEF18	chr19:7459998-7537371	IPF	CTRL	OK	16.7524	18.8345	-0.169013	-1.12429	0.749327	0.0828	0.19772	no	IPF vs CONTROL DOWN	unique	16.4451	19.4059	14.1894	16.9216	18.6554	14.8969	17.2851	18.4628	15.2182	21.8924	21.3141
ARHGEF19	ARHGEF19	ARHGEF19	chr1:16524598-16539104	IPF	CTRL	OK	6.32397	2.65412	1.2526	2.3827	-1.57764	0.00045	0.00310007	yes	IPF vs CONTROL UP	unique	7.93544	4.13657	4.89268	6.40532	6.15706	8.41677	2.52952	2.38516	2.48526	2.92589	2.94479
ARHGEF2	ARHGEF2	ARHGEF2	chr1:155916629-155948336	IPF	CTRL	OK	49.8	68.345	-0.456691	-1.37239	1.33422	0.00165	0.00909602	yes	IPF vs CONTROL DOWN	unique	50.7228	38.7548	54.0416	81.7232	32.9839	40.5735	59.0342	77.553	63.2826	72.9874	68.8678
ARHGEF25	ARHGEF25	ARHGEF25	chr12:58003962-58011028	IPF	CTRL	OK	15.4318	12.9875	0.248781	1.1882	-0.274914	0.5242	0.697016	no	IPF vs CONTROL UP	unique	13.1128	23.5321	17.0989	11.2175	10.5195	17.11	15.5867	11.8165	9.55186	12.9092	15.0733
ARHGEF26	ARHGEF26	ARHGEF26	chr3:153742189-153975616	IPF	CTRL	OK	11.2977	33.5116	-1.56864	-2.96624	3.47342	5e-05	0.000459061	yes	IPF vs CONTROL DOWN	unique	9.6057	7.52342	11.9408	21.4785	6.94172	10.2958	23.3384	34.4749	40.4829	37.1002	32.1615
ARHGEF26-AS1	ARHGEF26-AS1	ARHGEF26-AS1	chr3:153742189-153975616	IPF	CTRL	NOTEST	1.39048	1.25218	0.151134	1.11044	0	1	1	no	IPF vs CONTROL UP	unique	0.673149	1.02192	0.615322	1.09587	2.98726	1.94933	1.18579	0.932905	0.810844	1.42107	1.9103
ARHGEF28	ARHGEF28	ARHGEF28	chr5:72921982-73237818	IPF	CTRL	OK	6.61375	5.90204	0.164255	1.12059	-0.184846	0.6698	0.808317	no	IPF vs CONTROL UP	unique	4.3886	6.95185	4.41495	5.92235	10.8713	7.13343	7.62979	4.14368	6.24929	6.03158	5.45585
ARHGEF3	ARHGEF3	ARHGEF3	chr3:56761445-57113336	IPF	CTRL	OK	13.8628	18.2985	-0.400513	-1.31998	1.0899	0.01265	0.04705	yes	IPF vs CONTROL DOWN	unique	15.0124	13.281	12.8776	14.6462	12.7948	14.5646	18.725	17.1569	21.9296	18.3459	15.3353
ARHGEF3-AS1	ARHGEF3-AS1	ARHGEF3-AS1	chr3:56761445-57113336	IPF	CTRL	NOTEST	0.766262	0	Inf	0	0	1	1	no	IPF vs CONTROL UP (0)	unique	0.745825	0.849357	0.459568	1.03117	0.648122	0.863528	0	0	0	0	0
ARHGEF33	ARHGEF33	ARHGEF33	chr2:39146503-39202590	IPF	CTRL	OK	2.95474	0.713021	2.05102	4.14398	-2.07607	5e-05	0.000459061	yes	IPF vs CONTROL UP	unique	2.08529	2.60405	1.05312	2.75581	5.06924	4.16096	1.17971	0.511076	0.294302	0.632998	0.947017
ARHGEF35	ARHGEF35	ARHGEF35	chr7:143883175-143892791	IPF	CTRL	NOTEST	0.791181	0.703976	0.168482	1.12388	0	1	1	no	IPF vs CONTROL UP	unique	0.590422	0.537798	1.22345	0.494285	1.21723	0.683903	0.546157	0.490943	1.02308	0.74792	0.71178
ARHGEF37	ARHGEF37	ARHGEF37	chr5:148961134-149014527	IPF	CTRL	OK	6.53257	7.99595	-0.291618	-1.22401	0.881333	0.03615	0.105538	no	IPF vs CONTROL DOWN	unique	5.69066	5.74444	5.572	6.47232	5.38642	10.3296	4.30751	11.5272	6.49638	9.55982	8.08883
ARHGEF38	ARHGEF38	ARHGEF38	chr4:106473776-106602070	IPF	CTRL	OK	14.068	8.4679	0.732336	1.66133	-0.743446	0.07305	0.179765	no	IPF vs CONTROL UP	unique	8.85807	11.7018	9.87748	11	23.6365	19.3339	13.2521	8.4406	8.08416	4.87344	7.68921
ARHGEF38-IT1	ARHGEF38-IT1	ARHGEF38-IT1	chr4:106473776-106602070	IPF	CTRL	OK	3.50296	2.64646	0.404514	1.32364	-0.133469	0.77915	0.880153	no	IPF vs CONTROL UP	unique	0.820458	2.80312	2.5311	2.26625	4.99775	7.5991	4.26085	3.40252	2.36245	0.437599	2.76886
ARHGEF39	ARHGEF39	ARHGEF39	chr9:35658286-35665278	IPF	CTRL	NOTEST	1.63056	1.39892	0.221054	1.16558	0	1	1	no	IPF vs CONTROL UP	unique	1.53894	2.63372	2.04405	1.01951	1.07203	1.47512	1.24479	2.3258	1.38092	0.740288	1.30281
ARHGEF4	ARHGEF4	ARHGEF4	chr2:131674223-131804836	IPF	CTRL	OK	2.32409	3.39454	-0.546552	-1.46059	1.28289	0.0034	0.016461	yes	IPF vs CONTROL DOWN	unique	1.68212	2.68099	1.10608	1.12725	4.69849	2.6496	2.47974	2.30798	3.9814	4.16595	4.03764
ARHGEF40	ARHGEF40	ARHGEF40	chr14:21538526-21558036	IPF	CTRL	OK	18.8746	21.3779	-0.179673	-1.13263	0.669674	0.1155	0.250711	no	IPF vs CONTROL DOWN	unique	20.1328	23.1007	14.7644	25.1316	14.4094	15.7088	16.147	20.3886	18.6331	25.715	26.0058
ARHGEF5	ARHGEF5	ARHGEF5	chr7:144052488-144077725	IPF	CTRL	OK	2.5548	3.49486	-0.452025	-1.36796	1.13847	0.0072	0.0298584	yes	IPF vs CONTROL DOWN	unique	2.69706	2.36213	1.92602	4.27389	2.44749	1.62219	2.39654	2.15689	6.29292	1.94179	4.68614
ARHGEF6	ARHGEF6	ARHGEF6	chrX:135747711-135863503	IPF	CTRL	OK	16.4058	27.5533	-0.748026	-1.67949	1.89622	5e-05	0.000459061	yes	IPF vs CONTROL DOWN	unique	17.6267	17.5451	16.3595	17.9722	12.8969	16.0341	25.5949	32.0972	31.2388	20.8991	27.9367
ARHGEF7	ARHGEF7	ARHGEF7	chr13:111767623-111958081	IPF	CTRL	OK	33.4066	21.1482	0.659598	1.57964	-0.950631	0.02675	0.0844945	no	IPF vs CONTROL UP	unique	34.9069	42.2078	26.6105	34.2918	26.615	35.8078	21.7669	22.3079	21.7742	22.1183	17.7738
ARHGEF9	ARHGEF9	ARHGEF9	chrX:62854847-63005426	IPF	CTRL	OK	8.53152	6.98504	0.288535	1.2214	-0.132538	0.75475	0.863435	no	IPF vs CONTROL UP	unique	9.00228	9.47198	8.54134	7.64635	5.86055	10.6666	5.54448	9.03471	6.33784	6.68169	7.32646
ARID1A	ARID1A	ARID1A	chr1:27022521-27108601	IPF	CTRL	OK	29.797	27.8146	0.099321	1.07127	0.187231	0.66215	0.803373	no	IPF vs CONTROL UP	unique	29.7365	31.0119	24.7121	33.9709	29.1999	30.1505	25.1831	27.3701	28.2979	27.5875	30.6346
ARID1B	ARID1B	ARID1B	chr6:157099063-157531913	IPF	CTRL	OK	19.4711	18.596	0.0663368	1.04705	0.271935	0.52775	0.69971	no	IPF vs CONTROL UP	unique	18.4852	21.4145	16.4527	21.3093	19.7598	19.4048	16.1219	17.6306	19.33	18.543	21.3546
ARID2	ARID2	ARID2	chr12:46123619-46301819	IPF	CTRL	OK	17.7082	12.1123	0.547943	1.462	-0.783036	0.07025	0.174548	no	IPF vs CONTROL UP	unique	15.0853	19.9874	14.847	24.3382	15.7149	16.2763	13.0872	10.8957	13.1452	11.0839	12.3495
ARID3A	ARID3A	ARID3A	chr19:926036-972803	IPF	CTRL	OK	4.40739	5.41117	-0.296015	-1.22775	0.71525	0.0883	0.207196	no	IPF vs CONTROL DOWN	unique	4.44499	4.4725	3.77908	5.77058	3.90603	4.07116	5.07216	5.90971	3.88121	6.65502	5.53774
ARID3B	ARID3B	ARID3B	chr15:74833547-74890472	IPF	CTRL	OK	4.76983	3.60297	0.404752	1.32386	-0.203589	0.63825	0.786213	no	IPF vs CONTROL UP	unique	3.98458	4.92119	4.03013	6.97827	4.63678	4.06801	3.57211	3.37	3.70657	3.70443	3.66172
ARID3C	ARID3C	ARID3C	chr9:34621454-34628011	IPF	CTRL	NOTEST	0	0.051452	#NAME?	0	0	1	1	no	IPF vs CONTROL DOWN (0)	unique	0	0	0	0	0	0	0	0.25726	0	0	0
ARID4A	ARID4A	ARID4A	chr14:58765221-58840451	IPF	CTRL	OK	8.72837	9.43178	-0.111816	-1.08059	0.482966	0.25625	0.440228	no	IPF vs CONTROL DOWN	unique	6.80825	7.90866	11.1863	9.71973	9.34378	7.40353	11.2418	9.51557	9.48758	8.44085	8.47308
ARID4B	ARID4B	ARID4B	chr1:235330209-235491532	IPF	CTRL	OK	20.4357	16.577	0.301913	1.23278	-0.226163	0.594	0.753708	no	IPF vs CONTROL UP	unique	15.2843	24.0786	18.2407	20.4703	25.0392	19.5012	15.867	19.9503	18.7351	12.909	15.4234
ARID5A	ARID5A	ARID5A	chr2:97202463-97218371	IPF	CTRL	OK	16.7089	36.685	-1.13457	-2.19553	2.72939	5e-05	0.000459061	yes	IPF vs CONTROL DOWN	unique	15.9847	22.7502	14.6981	23.5991	13.9638	9.2577	31.9416	19.1055	65.6508	34.2478	32.4794
ARID5B	ARID5B	ARID5B	chr10:63661012-63856707	IPF	CTRL	OK	29.9396	29.1067	0.0407029	1.02861	0.366166	0.38745	0.578787	no	IPF vs CONTROL UP	unique	27.1075	29.9683	37.0409	24.844	27.1403	33.5365	25.299	20.287	48.4523	22.3964	29.0988
ARIH1	ARIH1	ARIH1	chr15:72766666-72878896	IPF	CTRL	OK	28.1871	26.2389	0.103331	1.07425	0.214865	0.60525	0.762553	no	IPF vs CONTROL UP	unique	26.9667	26.9967	31.9089	24.8551	24.5808	33.8147	24.9325	27.1328	30.7735	22.7177	25.6379
ARIH2	ARIH2	ARIH2	chr3:48955220-49022971	IPF	CTRL	OK	31.2847	19.9292	0.65057	1.56979	-1.0415	0.0156	0.0554882	no	IPF vs CONTROL UP	unique	29.2976	30.303	20.9765	42.7763	31.0787	33.276	18.8321	19.512	20.7933	22.0359	18.4729
ARIH2OS	ARIH2OS	ARIH2OS	chr3:48955220-49022971	IPF	CTRL	NOTEST	1.21415	1.29211	-0.0897835	-1.06421	0	1	1	no	IPF vs CONTROL DOWN	unique	1.87753	1.49644	0.69472	0.532995	1.14178	1.54145	0.729779	1.39162	1.10222	1.21105	2.0259
ARL1	ARL1	ARL1	chr12:101786902-101801572	IPF	CTRL	OK	20.6782	16.386	0.335646	1.26194	-0.271985	0.52265	0.69581	no	IPF vs CONTROL UP	unique	20.9746	17.5265	25.6635	14.4503	22.7227	22.7318	16.994	18.1535	15.7737	13.1083	17.9007
ARL10	ARL10	ARL10	chr5:175792501-175800503	IPF	CTRL	OK	9.15993	3.87913	1.2396	2.36133	-1.56555	0.0004	0.00281058	yes	IPF vs CONTROL UP	unique	8.14985	10.5258	5.63456	13.0679	8.98668	8.5948	2.96944	3.66645	4.91803	2.9535	4.88825
ARL11	ARL11	ARL11	chr13:50202434-50208008	IPF	CTRL	NOTEST	1.90065	1.42058	0.420016	1.33794	0	1	1	no	IPF vs CONTROL UP	unique	1.52886	2.1759	2.23465	1.38743	1.50915	2.56792	2.27709	1.43039	1.03042	1.29033	1.07466
ARL13A	ARL13A	ARL13A	chrX:100224696-100245820	IPF	CTRL	NOTEST	1.20433	0.566539	1.08799	2.12577	0	1	1	no	IPF vs CONTROL UP	unique	1.3991	1.32516	1.07546	1.14402	1.20396	1.07829	0.906639	0.610364	0.376849	0.413857	0.524986
ARL13B	ARL13B	ARL13B	chr3:93698982-93774522	IPF	CTRL	OK	5.3473	5.64649	-0.0785446	-1.05595	0.570068	0.17485	0.339155	no	IPF vs CONTROL DOWN	unique	4.69162	5.17488	5.44991	5.11753	6.30014	5.3497	5.72401	5.48997	7.62289	4.29201	5.10357
ARL14	ARL14	ARL14	chr3:160394947-160396235	IPF	CTRL	NOTEST	0.134942	0.0366494	1.88048	3.68197	0	1	1	no	IPF vs CONTROL UP	unique	0	0	0	0.330521	0.204286	0.274845	0.183247	0	0	0	0
ARL14EP	ARL14EP	ARL14EP	chr11:30344648-30359165	IPF	CTRL	OK	9.88728	7.01462	0.495209	1.40952	-0.371447	0.37835	0.570652	no	IPF vs CONTROL UP	unique	7.57174	8.81282	11.3928	10.3224	11.2843	9.93963	9.17267	6.99429	6.80164	4.88822	7.21628
ARL14EPL	ARL14EPL	ARL14EPL	chr5:115387162-115394827	IPF	CTRL	NOTEST	0	0.0545178	#NAME?	0	0	1	1	no	IPF vs CONTROL DOWN (0)	unique	0	0	0	0	0	0	0.272589	0	0	0	0
ARL15	ARL15	ARL15	chr5:53180613-53606403	IPF	CTRL	OK	11.4043	6.6079	0.787313	1.72586	-0.900696	0.0383	0.110368	no	IPF vs CONTROL UP	unique	11.1613	12.0392	10.7404	9.01614	13.2207	12.248	7.90934	5.49519	7.57774	6.07707	5.98015
ARL16	ARL16	ARL16	chr17:79648223-79650954	IPF	CTRL	OK	12.2899	9.23003	0.413062	1.33151	-0.15685	0.7095	0.835072	no	IPF vs CONTROL UP	unique	12.9984	9.57676	6.85095	13.8414	17.7783	12.6934	11.0246	7.6786	5.63987	9.8402	11.9669
ARL17A	ARL17A	ARL17A	chr17_ctg5_hap1:1450905-1513884	IPF	CTRL	NOTEST	0.942603	0.610513	0.626629	1.54395	0	1	1	no	IPF vs CONTROL UP	multiple	1.09499	0.952274	0.912367	0.808064	0.788082	1.09984	0.392724	0.953066	0.421724	0.413541	0.871508
ARL17B	ARL17B	ARL17B	chr17_ctg5_hap1:195720-458604	IPF	CTRL	NOTEST	0.0355901	0.0220574	0.690213	1.61352	0	1	1	no	IPF vs CONTROL UP	multiple	0	0	0.21354	0	0	0	0.110287	0	0	0	0
ARL2	ARL2	ARL2	chr11:64781584-64808044	IPF	CTRL	OK	18.4675	29.0996	-0.656006	-1.57571	1.02814	0.01915	0.0653386	no	IPF vs CONTROL DOWN	unique	18.8006	16.1588	28.2234	15.6598	14.0833	17.8793	22.7952	23.2127	29.338	33.6672	36.4847
ARL2-SNX15	ARL2-SNX15	ARL2-SNX15	chr11:64781584-64808044	IPF	CTRL	NOTEST	3.69837e-06	0.239341	-15.9818	-64715.2	0	1	1	no	IPF vs CONTROL DOWN	unique	4.60664e-23	3.43627e-09	1.01315e-11	2.68892e-10	9.66082e-06	1.25257e-05	4.64498e-08	2.00834e-17	0.000124754	1.19658	5.05894e-11
ARL2BP	ARL2BP	ARL2BP	chr16:57279037-57287545	IPF	CTRL	OK	28.1938	29.0354	-0.042436	-1.02985	0.498074	0.23045	0.409704	no	IPF vs CONTROL DOWN	unique	28.6239	26.2006	30.6262	21.5285	28.2156	33.968	26.6525	35.4363	26.7421	30.967	25.3792
ARL3	ARL3	ARL3	chr10:104433483-104474190	IPF	CTRL	OK	5.23238	5.22347	0.00245632	1.0017	0.310799	0.4612	0.64479	no	IPF vs CONTROL UP	unique	4.00279	4.64187	5.91362	4.24323	7.69845	4.89429	5.15831	6.01051	3.99679	4.84831	6.10345
ARL4A	ARL4A	ARL4A	chr7:12726451-12730558	IPF	CTRL	OK	9.96286	6.14808	0.696424	1.62048	-0.786713	0.0687	0.171597	no	IPF vs CONTROL UP	unique	8.71411	10.5097	13.2607	9.27036	8.34326	9.67904	10.5036	5.19954	4.76983	4.2424	6.02504
ARL4C	ARL4C	ARL4C	chr2:235401685-235405693	IPF	CTRL	OK	18.7468	14.9486	0.326628	1.25408	-0.209452	0.61795	0.772832	no	IPF vs CONTROL UP	unique	20.3274	16.9507	13.5992	19.8874	21.0711	20.6448	12.5527	14.8071	16.471	16.3469	14.5655
ARL4D	ARL4D	ARL4D	chr17:41476352-41478504	IPF	CTRL	OK	5.484	6.55793	-0.258012	-1.19583	0.532074	0.2146	0.39093	no	IPF vs CONTROL DOWN	unique	4.16704	4.96032	5.6635	4.22412	4.23589	9.65314	6.09016	9.84108	2.91654	6.70534	7.23655
ARL5A	ARL5A	ARL5A	chr2:152657479-152685009	IPF	CTRL	OK	20.1555	17.6511	0.191413	1.14188	0.141858	0.74345	0.85627	no	IPF vs CONTROL UP	unique	20.3283	16.449	22.8214	16.9659	23.1336	21.2347	20.7908	17.8243	19.1476	13.5733	16.9196
ARL5B	ARL5B	ARL5B	chr10:18948312-18966940	IPF	CTRL	OK	10.1614	11.101	-0.1276	-1.09247	0.68717	0.1082	0.239428	no	IPF vs CONTROL DOWN	unique	12.6722	9.67971	8.59738	7.16605	11.7042	11.1486	12.4612	6.41983	14.1315	11.5927	10.8999
ARL5C	ARL5C	ARL5C	chr17:37313146-37322414	IPF	CTRL	NOTEST	0.0639117	0	Inf	0	0	1	1	no	IPF vs CONTROL UP (0)	unique	0	0.38347	0	0	0	0	0	0	0	0	0
ARL6	ARL6	ARL6	chr3:97483594-97517373	IPF	CTRL	OK	2.98258	2.79365	0.094413	1.06763	0.0210529	0.96085	0.980394	no	IPF vs CONTROL UP	unique	1.34798	3.32559	2.33209	1.56489	4.64094	4.68402	3.75843	2.80115	1.51325	2.73177	3.16364
ARL6IP1	ARL6IP1	ARL6IP1	chr16:18802990-18812857	IPF	CTRL	OK	40.0506	41.1536	-0.0391974	-1.02754	0.557095	0.18945	0.358255	no	IPF vs CONTROL DOWN	unique	39.4027	30.1058	53.727	29.835	40.0907	47.1422	55.2618	44.0515	37.68	37.0858	31.6891
ARL6IP4	ARL6IP4	ARL6IP4	chr12:123464879-123467460	IPF	CTRL	OK	24.3699	45.5759	-0.903169	-1.87017	1.81518	5e-05	0.000459061	yes	IPF vs CONTROL DOWN	unique	20.6193	21.5769	28.8151	14.8261	37.0601	23.3221	32.4935	51.0209	41.7153	51.6871	50.9627
ARL6IP5	ARL6IP5	ARL6IP5	chr3:69134089-69155239	IPF	CTRL	OK	47.1352	51.2851	-0.121733	-1.08804	0.674614	0.1072	0.237527	no	IPF vs CONTROL DOWN	unique	49.3956	32.1381	66.979	34.1609	50.2944	49.8433	65.0811	49.4682	50.4772	47.5569	43.8419
ARL6IP6	ARL6IP6	ARL6IP6	chr2:153574406-153617767	IPF	CTRL	OK	4.60024	5.06749	-0.139562	-1.10157	0.32634	0.4428	0.628853	no	IPF vs CONTROL DOWN	unique	4.64258	3.3931	4.75353	5.73661	5.98075	3.09489	6.90177	4.80674	3.66047	5.15158	4.81691
ARL8A	ARL8A	ARL8A	chr1:202102531-202113871	IPF	CTRL	OK	15.0153	28.0847	-0.903348	-1.8704	2.01431	5e-05	0.000459061	yes	IPF vs CONTROL DOWN	unique	16.9075	13.9648	16.7839	13.4057	13.6701	15.3599	24.6785	33.7629	26.8028	26.9661	28.2131
ARL8B	ARL8B	ARL8B	chr3:5163929-5222601	IPF	CTRL	OK	28.8444	27.734	0.0566339	1.04004	0.474697	0.2618	0.446874	no	IPF vs CONTROL UP	unique	30.0925	25.9734	32.6453	26.1488	24.9229	33.2833	34.7597	27.6477	28.2238	25.3541	22.6847
ARL9	ARL9	ARL9	chr4:57371374-57390058	IPF	CTRL	NOTEST	0.664787	0.131417	2.33874	5.05861	0	1	1	no	IPF vs CONTROL UP	unique	0.77139	0.439185	0.236165	0.536056	0.665895	1.34003	0.398004	0	0	0	0.25908
ARMC1	ARMC1	ARMC1	chr8:66514690-66546452	IPF	CTRL	OK	10.9003	8.08784	0.430536	1.34773	-0.410731	0.34	0.532643	no	IPF vs CONTROL UP	unique	11.8027	11.1625	11.2495	11.1596	8.00945	12.0178	9.75525	8.60784	6.13975	7.33244	8.60391
ARMC10	ARMC10	ARMC10	chr7:102715327-102789569	IPF	CTRL	OK	7.10061	5.91699	0.263079	1.20004	0.0112902	0.9802	0.991177	no	IPF vs CONTROL UP	unique	5.49591	6.90276	6.73759	6.22474	7.76677	9.47588	5.72117	5.1978	6.63592	6.28575	5.74431
ARMC12	ARMC12	ARMC12	chr6:35704858-35716685	IPF	CTRL	NOTEST	0.618892	0.174396	1.82732	3.54878	0	1	1	no	IPF vs CONTROL UP	unique	0.792131	0	0	1.47053	0.227424	1.22327	0.203982	0.274301	0.254028	0.139668	0
ARMC2	ARMC2	ARMC2	chr6:109169618-109295352	IPF	CTRL	OK	13.4401	3.54493	1.92271	3.79136	-2.72486	5e-05	0.000459061	yes	IPF vs CONTROL UP	unique	5.49131	13.9474	4.52831	8.96301	32.3466	15.364	4.27429	2.54678	2.9282	2.94152	5.03388
ARMC3	ARMC3	ARMC3	chr10:23216953-23326514	IPF	CTRL	OK	7.93492	1.67928	2.24037	4.72518	-2.45628	5e-05	0.000459061	yes	IPF vs CONTROL UP	unique	2.17242	3.41576	1.57579	1.87683	32.3376	6.2311	2.68413	0	0.697144	0.928028	4.08712
ARMC4	ARMC4	ARMC4	chr10:28101096-28287977	IPF	CTRL	OK	6.6434	1.434	2.21188	4.63277	-2.47124	5e-05	0.000459061	yes	IPF vs CONTROL UP	unique	1.61196	3.76244	1.27632	1.23771	25.53	6.44195	1.73866	0.0837841	1.08641	0.807828	3.45332
ARMC5	ARMC5	ARMC5	chr16:31470316-31478488	IPF	CTRL	OK	6.29978	6.0501	0.0583422	1.04127	0.490413	0.25515	0.439085	no	IPF vs CONTROL UP	unique	6.76512	8.24786	5.4773	6.22276	6.28631	4.79931	4.69878	6.28858	5.67139	7.43455	6.15719
ARMC6	ARMC6	ARMC6	chr19:19144386-19168987	IPF	CTRL	OK	7.16024	8.0405	-0.167277	-1.12294	0.374809	0.3803	0.572453	no	IPF vs CONTROL DOWN	unique	9.34656	7.14125	5.09715	7.37798	7.81625	6.18226	8.31697	7.32302	7.1074	9.21806	8.23705
ARMC7	ARMC7	ARMC7	chr17:73106081-73127890	IPF	CTRL	OK	8.88134	10.1816	-0.197113	-1.1464	0.556048	0.19465	0.365125	no	IPF vs CONTROL DOWN	unique	9.83354	8.67329	5.82639	12.3642	8.56928	8.02135	7.83175	11.2278	12.2652	10.6762	8.90699
ARMC8	ARMC8	ARMC8	chr3:137906114-138048728	IPF	CTRL	OK	18.4411	11.4899	0.682564	1.60499	-0.943637	0.0291	0.0898931	no	IPF vs CONTROL UP	unique	18.8946	19.6402	14.0552	21.3466	16.5933	20.1169	14.3856	11.2638	11.8846	9.69977	10.2156
ARMC9	ARMC9	ARMC9	chr2:232063293-232238606	IPF	CTRL	OK	6.95282	5.28041	0.39695	1.31672	-0.871787	0.04135	0.116911	no	IPF vs CONTROL UP	unique	6.15131	7.0738	3.56164	4.52728	14.0251	6.3778	4.44959	4.31241	9.74349	3.88886	4.00768
ARMCX1	ARMCX1	ARMCX1	chrX:100805513-100809675	IPF	CTRL	OK	8.76252	10.8244	-0.304867	-1.2353	0.881387	0.0398	0.113568	no	IPF vs CONTROL DOWN	unique	6.76301	7.54318	9.25617	7.50837	10.793	10.7114	9.68474	11.3323	9.96419	10.5663	12.5744
ARMCX2	ARMCX2	ARMCX2	chrX:100910267-100914863	IPF	CTRL	OK	12.6131	10.9803	0.200006	1.1487	0.06809	0.87105	0.933965	no	IPF vs CONTROL UP	unique	12.266	15.3945	12.5408	14.652	9.86809	10.9572	11.9503	12.5125	9.70718	8.57169	12.1598
ARMCX3	ARMCX3	ARMCX3	chrX:100878119-100882831	IPF	CTRL	OK	22.9513	21.5396	0.0915823	1.06554	0.344561	0.4214	0.610422	no	IPF vs CONTROL UP	unique	25.0401	25.7503	26.657	18.7782	19.4151	22.0669	22.4783	21.8174	20.6034	20.0634	22.7355
ARMCX4	ARMCX4	ARMCX4	chrX:100673250-100790975	IPF	CTRL	OK	11.5411	10.4141	0.148244	1.10822	0.150334	0.72655	0.845347	no	IPF vs CONTROL UP	unique	11.8508	13.2468	10.5955	12.9131	7.67087	12.9693	8.23851	11.865	10.9703	8.58797	12.4085
ARMCX5	ARMCX5	ARMCX5	chrX:101854095-101972661	IPF	CTRL	OK	8.10463	4.20529	0.946542	1.92725	-0.523044	0.23525	0.415313	no	IPF vs CONTROL UP	unique	9.79733	8.49529	6.61717	6.40309	6.91118	10.4037	5.25683	3.91291	3.31801	3.91693	4.62175
ARMCX5-GPRASP2	ARMCX5-GPRASP2,GPRASP2	ARMCX5-GPRASP2,GPRASP2	chrX:101854095-101972661	IPF	CTRL	OK	1.71442	1.42947	0.262242	1.19934	-0.199927	0.6498	0.794619	no	IPF vs CONTROL UP	unique	3.44297e-25	1.6164e-07	1.73107	6.49582	0.000362623	2.05928	1.47465	1.35772	1.62301	1.53041	1.16156
ARMCX6	ARMCX6	ARMCX6	chrX:100870107-100872991	IPF	CTRL	OK	1.91031	2.17972	-0.190339	-1.14103	0.559038	0.17085	0.333704	no	IPF vs CONTROL DOWN	unique	3.27254	1.83252	2.07957	0.896309	1.51962	1.86129	3.06049	1.50297	1.70134	1.18818	3.44563
ARMS2	ARMS2	ARMS2	chr10:124214178-124216868	IPF	CTRL	NOTEST	0.20032	0.232565	-0.215325	-1.16097	0	1	1	no	IPF vs CONTROL DOWN	unique	0	0	0.737247	0	0	0.464674	0.20707	0.41662	0	0	0.539134
ARNT	ARNT	ARNT	chr1:150782180-150849244	IPF	CTRL	OK	25.604	26.2291	-0.034803	-1.02442	0.396695	0.35355	0.546811	no	IPF vs CONTROL DOWN	unique	23.5807	28.2577	27.2981	26.7591	21.2052	26.5229	24.4873	29.4035	25.5289	27.9126	23.8133
ARNT2	ARNT2	ARNT2	chr15:80696691-80890277	IPF	CTRL	OK	5.19669	7.56147	-0.541075	-1.45506	1.38628	0.00115	0.0067394	yes	IPF vs CONTROL DOWN	unique	6.27201	3.10267	4.44944	5.98156	5.86272	5.51172	5.86196	6.20602	7.03941	8.59768	10.1023
ARNTL	ARNTL	ARNTL	chr11:13299324-13408812	IPF	CTRL	OK	4.74658	3.96741	0.258693	1.19639	-0.0547356	0.89985	0.949477	no	IPF vs CONTROL UP	unique	3.18375	3.14163	4.35952	6.81267	4.83547	6.14647	6.55891	2.75774	3.88239	3.86636	2.77164
ARNTL2	ARNTL2	ARNTL2	chr12:27485786-27578746	IPF	CTRL	OK	2.84784	0.789648	1.85059	3.60647	-2.25799	5e-05	0.000459061	yes	IPF vs CONTROL UP	unique	3.53462	2.33186	1.91102	3.02601	2.17583	4.1077	0.780095	0.729239	0.961893	0.486135	0.990879
ARPC1A	ARPC1A	ARPC1A	chr7:98923495-98963885	IPF	CTRL	OK	20.907	23.3823	-0.161426	-1.11839	0.708097	0.09745	0.221996	no	IPF vs CONTROL DOWN	unique	25.1939	15.5117	22.6609	14.5673	23.9471	23.5613	24.0489	21.1378	23.1686	23.6644	24.8916
ARPC1B	ARPC1B	ARPC1B	chr7:98972297-99006305	IPF	CTRL	OK	45.8217	67.271	-0.553953	-1.4681	1.13138	0.01025	0.0397739	yes	IPF vs CONTROL DOWN	unique	53.0889	38.5075	56.7844	27.4034	63.39	35.7559	86.4201	61.2939	62.2536	79.0699	47.3173
ARPC2	ARPC2	ARPC2	chr2:219081873-219119071	IPF	CTRL	OK	78.7243	97.2784	-0.305311	-1.23568	1.20318	0.00515	0.0228188	yes	IPF vs CONTROL DOWN	unique	87.5169	76.017	86.5897	67.3867	82.5061	72.3294	122.905	99.097	97.6342	89.1859	77.57
ARPC3	ARPC3	ARPC3	chr12:110872705-110888158	IPF	CTRL	OK	13.829	17.3333	-0.325852	-1.2534	0.834503	0.05405	0.142723	no	IPF vs CONTROL DOWN	unique	11.2119	14.4141	17.2664	7.54274	19.9728	12.566	23.7841	17.2773	15.9994	15.5187	14.0871
ARPC4	ARPC4	ARPC4	chr3:9821653-9878040	IPF	CTRL	OK	53.0313	66.549	-0.327574	-1.2549	0.587089	0.1721	0.335767	no	IPF vs CONTROL DOWN	unique	59.6418	43.4803	61.1155	38.7166	59.1975	56.0359	67.3482	81.1008	54.8537	73.8472	55.5952
ARPC4-TTLL3	ARPC4-TTLL3	ARPC4-TTLL3	chr3:9821653-9878040	IPF	CTRL	OK	11.7028	6.33333	0.885824	1.84782	-0.429894	0.3238	0.51694	no	IPF vs CONTROL UP	unique	9.45675	15.7671	5.83537	14.6	14.8481	9.70973	7.38741	6.67021	7.48275	3.08307	7.04319
ARPC5	ARPC5	ARPC5	chr1:183595327-183605076	IPF	CTRL	OK	37.7887	55.9186	-0.565374	-1.47977	1.7762	5e-05	0.000459061	yes	IPF vs CONTROL DOWN	unique	42.5981	33.4573	45.9594	33.4617	36.2323	35.0235	67.979	53.998	58.7561	49.3192	49.5409
ARPC5L	ARPC5L	ARPC5L	chr9:127631483-127639696	IPF	CTRL	OK	13.956	18.4875	-0.405661	-1.3247	1.04151	0.0155	0.0552363	no	IPF vs CONTROL DOWN	unique	17.7332	13.2293	10.8431	10.6359	17.1303	14.1643	12.4475	15.5611	29.7036	16.6681	18.0571
ARPP19	ARPP19	ARPP19	chr15:52839431-52861213	IPF	CTRL	OK	44.9868	49.7162	-0.144212	-1.10513	0.803753	0.0586	0.151853	no	IPF vs CONTROL DOWN	unique	50.0252	33.0677	50.9936	38.4791	41.454	55.9015	51.6944	54.074	53.4337	42.3353	47.0435
ARPP21	ARPP21	ARPP21	chr3:35680665-35835988	IPF	CTRL	NOTEST	0	0.0662364	#NAME?	0	0	1	1	no	IPF vs CONTROL DOWN (0)	unique	0	0	0	0	0	0	0	0	0.331182	0	0
ARR3	ARR3	ARR3	chrX:69488184-69501690	IPF	CTRL	NOTEST	0.263288	0.308418	-0.228246	-1.17141	0	1	1	no	IPF vs CONTROL DOWN	unique	0.23313	0	0.427103	0.649473	0	0.270019	0.360035	0.242213	0.224316	0.246518	0.469006
ARRB1	ARRB1	ARRB1	chr11:74971165-75062875	IPF	CTRL	OK	18.6418	52.5135	-1.49415	-2.81697	3.39006	5e-05	0.000459061	yes	IPF vs CONTROL DOWN	unique	15.5526	14.742	21.9177	20.6714	16.5782	22.389	51.7598	66.6596	31.6627	58.9345	53.551
ARRB2	ARRB2	ARRB2	chr17:4613788-4624795	IPF	CTRL	OK	24.5521	30.9981	-0.336336	-1.26255	0.856654	0.04625	0.127181	no	IPF vs CONTROL DOWN	unique	25.7481	28.0695	21.25	31.9459	19.7322	20.5666	40.0404	35.0357	27.3029	34.5764	18.0351
ARRDC1	ARRDC1	ARRDC1	chr9:140500095-140513308	IPF	CTRL	OK	17.3626	19.2605	-0.149664	-1.10931	0.390447	0.3633	0.556316	no	IPF vs CONTROL DOWN	unique	21.0283	13.468	12.6023	20.4128	19.7015	16.9626	20.573	15.2178	17.1655	19.9394	23.4068
ARRDC2	ARRDC2	ARRDC2	chr19:18111943-18124911	IPF	CTRL	OK	29.0024	34.4242	-0.247251	-1.18694	0.903892	0.0322	0.0969777	no	IPF vs CONTROL DOWN	unique	33.0456	30.3763	29.5147	33.3496	24.913	22.815	28.4483	43.6605	35.3231	25.607	39.0819
ARRDC3	ARRDC3	ARRDC3	chr5:90664540-90716532	IPF	CTRL	OK	50.4608	59.7191	-0.243031	-1.18348	0.937057	0.02845	0.0884262	no	IPF vs CONTROL DOWN	unique	46.6939	54.1837	57.5803	43.4656	54.9693	45.8718	76.127	50.0453	61.1399	52.5974	58.686
ARRDC3-AS1	ARRDC3-AS1	ARRDC3-AS1	chr5:90664540-90716532	IPF	CTRL	OK	8.49615	7.99037	0.0885454	1.0633	0.0657198	0.88035	0.938737	no	IPF vs CONTROL UP	unique	9.21932	10.3641	5.7609	9.60719	8.32025	7.70511	6.89673	7.88435	8.5381	6.15949	10.4732
ARRDC4	ARRDC4	ARRDC4	chr15:98503932-98517068	IPF	CTRL	OK	12.5463	13.0306	-0.0546446	-1.0386	0.452596	0.29015	0.479176	no	IPF vs CONTROL DOWN	unique	13.4669	11.8811	9.01653	11.2229	14.8259	14.8646	21.1095	12.6804	9.64015	11.5285	10.1947
ARRDC5	ARRDC5	ARRDC5	chr19:4890448-4902879	IPF	CTRL	OK	3.59686	1.09593	1.71458	3.28201	-1.40742	0.00125	0.00722206	yes	IPF vs CONTROL UP	unique	4.20503	3.74705	1.56172	7.64566	2.51579	1.90588	0.89344	0.189985	1.75953	0.676141	1.96056
ARSA	ARSA	ARSA	chr22:51061181-51066601	IPF	CTRL	OK	13.5692	11.4116	0.249831	1.18907	-0.124694	0.76915	0.87306	no	IPF vs CONTROL UP	unique	16.5064	16.4676	8.97686	13.5263	12.4694	13.4688	11.9522	10.9666	9.41274	13.5417	11.185
ARSB	ARSB	ARSB	chr5:78073036-78282357	IPF	CTRL	OK	7.39231	6.52689	0.17963	1.13259	-0.0068961	0.9878	0.994994	no	IPF vs CONTROL UP	unique	8.63226	8.5797	6.57763	5.37992	5.80685	9.3775	8.80855	5.17598	6.00553	6.96055	5.68384
ARSD	ARSD	ARSD	chrX:2822010-2847416	IPF	CTRL	OK	16.4618	14.4118	0.191872	1.14224	0.0479966	0.906	0.953097	no	IPF vs CONTROL UP	unique	17.2109	12.8342	15.8339	17.3553	22.0329	13.5035	11.3632	13.7198	12.0721	12.3812	22.5226
ARSE	ARSE	ARSE	chrX:2852672-2882494	IPF	CTRL	NOTEST	0.204763	0.338715	-0.726119	-1.65418	0	1	1	no	IPF vs CONTROL DOWN	unique	0.396963	0	0.564649	0	0.113695	0.15327	0.238052	0.275052	0.127373	0.698557	0.354542
ARSF	ARSF	ARSF	chrX:2958274-3030770	IPF	CTRL	NOTEST	0.0194393	0	Inf	0	0	1	1	no	IPF vs CONTROL UP (0)	unique	0	0	0	0	0.116636	0	0	0	0	0	0
ARSG	ARSG	ARSG	chr17:66255322-66417000	IPF	CTRL	OK	6.08266	4.07224	0.578879	1.49369	-0.394007	0.34085	0.533533	no	IPF vs CONTROL UP	unique	5.04657	8.20632	3.48541	7.19853	6.45371	6.10543	4.89853	4.19484	3.56077	3.49116	4.21592
ARSH	ARSH	ARSH	chrX:2924653-2951426	IPF	CTRL	NOTEST	0.034152	0	Inf	0	0	1	1	no	IPF vs CONTROL UP (0)	unique	0	0	0	0	0	0.204912	0	0	0	0	0
ARSI	ARSI	ARSI	chr5:149675908-149682525	IPF	CTRL	OK	2.8115	4.57407	-0.702137	-1.62691	1.48701	0.0006	0.00394505	yes	IPF vs CONTROL DOWN	unique	4.19921	3.11813	1.83513	3.82266	1.56756	2.32634	2.69642	4.27015	5.09754	4.81637	5.98989
ARSJ	ARSJ	ARSJ	chr4:114821439-114900878	IPF	CTRL	OK	7.28342	6.25211	0.220273	1.16495	-0.0798372	0.8558	0.925046	no	IPF vs CONTROL UP	unique	7.69481	6.95322	5.31713	10.2338	5.08328	8.4183	3.38661	6.41234	8.46775	7.76176	5.2321
ARSK	ARSK	ARSK	chr5:94890824-94940806	IPF	CTRL	OK	2.18979	1.7392	0.33237	1.25908	-0.0991441	0.81795	0.903868	no	IPF vs CONTROL UP	unique	2.84656	0.883915	1.94407	2.16743	1.99947	3.29732	1.88309	1.79335	1.66099	1.68378	1.6748
ART1	ART1	ART1	chr11:3666360-3685646	IPF	CTRL	NOTEST	0.710307	0.917328	-0.368996	-1.29145	0	1	1	no	IPF vs CONTROL DOWN	unique	0.697639	0.794352	0.14201	1.61963	0.200179	0.80803	0.418986	1.93286	0.44751	1.4754	0.311886
ART3	ART3	ART3	chr4:76932332-77033955	IPF	CTRL	NOTEST	0.0561193	0.230465	-2.03798	-4.10669	0	1	1	no	IPF vs CONTROL DOWN	unique	0	0	0	0	0.336716	0	0.100693	0.610192	0	0.310304	0.131134
ART4	ART4	ART4	chr12:14982244-14996413	IPF	CTRL	OK	1.85261	2.87903	-0.636024	-1.55404	0.660834	0.12255	0.26196	no	IPF vs CONTROL DOWN	unique	1.55147	3.02835	0.94726	2.77903	1.52601	1.28355	1.9393	2.99367	3.4123	2.92908	3.12082
ART5	ART5	ART5	chr11:3659735-3663546	IPF	CTRL	NOTEST	0.232901	0.431332	-0.889082	-1.852	0	1	1	no	IPF vs CONTROL DOWN	unique	0.736325	0	0.449756	0	0.211324	0	0.126372	1.27497	0.236144	0.519172	0
ARTN	ARTN	ARTN	chr1:44398991-44402912	IPF	CTRL	NOTEST	1.59676	0.506782	1.65571	3.15079	0	1	1	no	IPF vs CONTROL UP	unique	2.65303	0.943651	1.5166	1.93634	1.45879	1.07216	0.298353	0.516757	0.638134	0.525304	0.555363
ARV1	ARV1	ARV1	chr1:231114822-231136479	IPF	CTRL	OK	4.05481	4.51587	-0.15537	-1.11371	0.301588	0.47685	0.657735	no	IPF vs CONTROL DOWN	unique	3.34916	2.38339	6.00549	4.37514	2.88178	5.33388	6.78623	4.56743	4.02858	2.98709	4.21001
ARVCF	ARVCF	ARVCF	chr22:19863039-20004309	IPF	CTRL	OK	8.19607	10.5696	-0.366914	-1.28959	0.678715	0.1188	0.255967	no	IPF vs CONTROL DOWN	unique	7.53285	12.0559	5.92875	7.54102	6.40423	9.71364	5.56548	13.2977	11.4269	8.09631	14.4615
ARX	ARX	ARX	chrX:25021812-25034065	IPF	CTRL	NOTEST	0.535588	0.186019	1.52567	2.87921	0	1	1	no	IPF vs CONTROL UP	unique	0.201951	0.229938	0.0615221	0.140925	1.99437	0.584821	0.311271	0	0	0.213132	0.405692
AS3MT	AS3MT	AS3MT	chr10:104613966-104661655	IPF	CTRL	OK	1.53868	2.04938	-0.413492	-1.33191	0.312551	0.4862	0.665833	no	IPF vs CONTROL DOWN	unique	1.89533	7.26405e-05	2.01981	2.14904	1.52089	1.64695	2.19205	1.35438	2.85135	0.436998	3.41212
ASAH1	ASAH1	ASAH1	chr8:17913924-17942507	IPF	CTRL	OK	52.8346	87.4645	-0.727213	-1.65544	1.89937	5e-05	0.000459061	yes	IPF vs CONTROL DOWN	unique	52.4284	41.1714	74.8244	43.5622	48.6217	56.3997	134.499	77.6342	88.6468	68.9491	67.5933
ASAH2	ASAH2	ASAH2	chr10:51946999-52008370	IPF	CTRL	NOTEST	0	0.00651202	#NAME?	0	0	1	1	no	IPF vs CONTROL DOWN (0)	unique	0	0	0	0	0	0	0.0325601	0	0	0	0
ASAH2B	ASAH2B	ASAH2B	chr10:52499687-52514569	IPF	CTRL	NOTEST	0	0	0	1	0	1	1	no	IPF vs. CONTROL EQUAL(0)	unique	0	0	0	0	0	0	0	0	0	0	0
ASAP1	ASAP1	ASAP1	chr8:131064350-131455906	IPF	CTRL	OK	20.7757	18.5964	0.159871	1.11719	-0.107237	0.7986	0.892841	no	IPF vs CONTROL UP	unique	22.7593	21.7956	19.0726	24.4522	14.5872	21.9871	17.973	18.5934	20.1593	19.1549	17.1014
ASAP1-IT1	ASAP1-IT1	ASAP1-IT1	chr8:131064350-131455906	IPF	CTRL	OK	13.9059	11.2397	0.307097	1.23722	-0.0290949	0.94555	0.972314	no	IPF vs CONTROL UP	unique	14.3861	14.8915	13.7439	13.8394	9.91231	16.6622	11.7869	9.23879	16.8603	7.60938	10.703
ASAP2	ASAP2	ASAP2	chr2:9346893-9545812	IPF	CTRL	OK	13.1346	13.6905	-0.0598067	-1.04233	0.364156	0.3907	0.581481	no	IPF vs CONTROL DOWN	unique	12.7936	15.3789	15.1728	13.2406	8.87802	13.3437	12.9784	13.8611	13.4968	14.3744	13.742
ASAP3	ASAP3	ASAP3	chr1:23755055-23810750	IPF	CTRL	OK	11.8155	11.1849	0.0791175	1.05637	0.0581941	0.89045	0.944572	no	IPF vs CONTROL UP	unique	12.0265	15.9657	9.00397	12.2954	10.2569	11.3443	11.3363	9.25584	8.5461	14.4259	12.3606
ASB1	ASB1	ASB1	chr2:239335625-239360891	IPF	CTRL	OK	12.0825	9.75075	0.30933	1.23913	-0.338277	0.4306	0.618264	no	IPF vs CONTROL UP	unique	11.7818	11.9028	11.3877	11.0682	11.6011	14.7532	7.99632	10.6534	8.70888	9.92974	11.4654
ASB10	ASB10	ASB10	chr7:150872784-150884919	IPF	CTRL	NOTEST	0	0	0	1	0	1	1	no	IPF vs. CONTROL EQUAL(0)	unique	0	0	0	0	0	0	0	0	0	0	0
ASB11	ASB11	ASB11	chrX:15299830-15333746	IPF	CTRL	NOTEST	0.133201	0.0750153	0.828353	1.77566	0	1	1	no	IPF vs CONTROL UP	unique	0.106224	0.238222	0	0	0.0912291	0.363533	0.216753	0	0.102265	0.0560583	0
ASB12	ASB12	ASB12	chrX:63444071-63450511	IPF	CTRL	NOTEST	0.359164	0.278605	0.366421	1.28915	0	1	1	no	IPF vs CONTROL UP	unique	0.236291	0.269049	0.288613	0	0.813667	0.547361	0.121645	0	0.45471	0.499747	0.316922
ASB13	ASB13	ASB13	chr10:5680819-5708558	IPF	CTRL	OK	7.35433	6.62876	0.149854	1.10946	0.0758964	0.86075	0.927946	no	IPF vs CONTROL UP	unique	7.47116	4.89745	6.69121	9.31923	7.4864	8.26053	6.44978	8.23579	5.66657	7.14812	5.64356
ASB14	ASB14	ASB14	chr3:57261764-57326710	IPF	CTRL	OK	7.33927	2.64645	1.47158	2.77325	-0.735362	0.24775	0.429965	no	IPF vs CONTROL UP	unique	5.88044	6.70137	3.82827	8.38919	10.8255	8.41082	2.47325	2.10053	1.94504	1.70049	5.01295
ASB15	ASB15	ASB15	chr7:123249111-123277932	IPF	CTRL	NOTEST	0.0704172	0.089549	-0.34675	-1.27169	0	1	1	no	IPF vs CONTROL DOWN	unique	0	0.122419	0	0.300084	0	0	0.0552454	0	0.207016	0.113482	0.0720016
ASB16	ASB16	ASB16	chr17:42248073-42264085	IPF	CTRL	OK	3.00206	2.81083	0.0949582	1.06803	0.210682	0.62905	0.780082	no	IPF vs CONTROL UP	unique	3.6371	3.4176	2.24637	3.81776	2.33447	2.55908	1.57847	4.43689	1.65657	2.41836	3.96386
ASB16-AS1	ASB16-AS1	ASB16-AS1	chr17:42248073-42264085	IPF	CTRL	OK	11.2287	6.1946	0.858101	1.81265	-1.18557	0.006	0.0258368	yes	IPF vs CONTROL UP	unique	11.7759	14.943	7.46572	12.3533	8.73961	12.0944	5.45725	7.70123	4.94138	6.4304	6.44276
ASB17	ASB17	ASB17	chr1:76384557-76398116	IPF	CTRL	NOTEST	0	0	0	1	0	1	1	no	IPF vs. CONTROL EQUAL(0)	unique	0	0	0	0	0	0	0	0	0	0	0
ASB18	ASB18	ASB18	chr2:237103514-237172988	IPF	CTRL	NOTEST	0	0	0	1	0	1	1	no	IPF vs. CONTROL EQUAL(0)	unique	0	0	0	0	0	0	0	0	0	0	0
ASB2	ASB2	ASB2	chr14:94400498-94443076	IPF	CTRL	OK	9.34646	2.31234	2.01506	4.04199	-2.57674	5e-05	0.000459061	yes	IPF vs CONTROL UP	unique	8.48641	15.8594	9.75476	3.94382	4.58196	13.4524	1.7739	0.977552	1.81079	2.37401	4.62546
ASB3	ASB3	ASB3	chr2:53897116-54087170	IPF	CTRL	OK	10.8105	6.39012	0.758525	1.69176	-0.462135	0.29715	0.487864	no	IPF vs CONTROL UP	unique	8.40127	13.1605	10.7032	14.3873	8.8224	9.3886	10.7185	7.83914	4.96905	2.51013	5.91377
ASB4	ASB4	ASB4	chr7:95115212-95169543	IPF	CTRL	NOTEST	0.38823	0.294872	0.396822	1.3166	0	1	1	no	IPF vs CONTROL UP	unique	0.584842	0.0855348	0.77777	0.104886	0.167185	0.609164	0.424469	0.202488	0.188966	0.356664	0.301775
ASB5	ASB5	ASB5	chr4:177134825-177190373	IPF	CTRL	NOTEST	0.45801	0.0845357	2.43775	5.41795	0	1	1	no	IPF vs CONTROL UP	unique	0.286823	0.979713	0.465969	0.133444	0.328376	0.553735	0.0736752	0	0.184093	0.100893	0.0640171
ASB6	ASB6	ASB6	chr9:132388434-132404448	IPF	CTRL	OK	10.1164	7.78128	0.37862	1.3001	-0.369484	0.3812	0.573181	no	IPF vs CONTROL UP	unique	10.0664	10.1021	7.1601	14.1209	8.4037	10.8453	6.63654	7.81552	7.80566	8.27327	8.37539
ASB7	ASB7	ASB7	chr15:101142754-101191904	IPF	CTRL	OK	7.12352	5.60725	0.345296	1.27041	-0.332386	0.4468	0.632695	no	IPF vs CONTROL UP	unique	6.89786	6.39427	6.66785	7.35412	8.43556	6.99143	5.46126	4.60141	6.74282	6.43321	4.79755
ASB8	ASB8	ASB8	chr12:48541571-48551377	IPF	CTRL	OK	12.8491	10.4741	0.294846	1.22675	-0.0435975	0.91255	0.956123	no	IPF vs CONTROL UP	unique	10.7058	12.4434	12.5722	14.7834	13.0266	13.5634	9.71305	12.7505	9.01801	10.3585	10.5304
ASB9	ASB9	ASB9	chrX:15262108-15288589	IPF	CTRL	OK	1.38914	2.09499	-0.592758	-1.50813	0.935504	0.02665	0.0842665	no	IPF vs CONTROL DOWN	unique	1.58007	0.399724	1.4707	0.734187	1.35767	2.79246	2.35083	2.18932	1.68968	2.09222	2.15291
ASB9P1	ASB9P1	ASB9P1	chr15:93338713-93340338	IPF	CTRL	OK	7.45921	5.59152	0.415783	1.33402	-0.25996	0.53455	0.70533	no	IPF vs CONTROL UP	unique	7.19158	5.45895	7.53842	10.7957	5.86796	7.90266	7.68344	4.4072	4.61408	4.57895	6.67392
ASCC1	ASCC1	ASCC1	chr10:73855789-73995618	IPF	CTRL	OK	7.90186	6.92122	0.191167	1.14169	-0.0903801	0.8356	0.914368	no	IPF vs CONTROL UP	unique	8.59271	6.76112	8.24829	8.15487	7.06539	8.58881	6.59563	7.41958	6.76032	5.6063	8.22426
ASCC2	ASCC2	ASCC2	chr22:30184596-30234293	IPF	CTRL	OK	11.6771	12.3226	-0.0776309	-1.05528	0.118942	0.78105	0.881482	no	IPF vs CONTROL DOWN	unique	12.5509	10.4251	9.77872	13.4921	14.0511	9.76447	14.4298	9.46768	12.7763	11.9975	12.9418
ASCC3	ASCC3	ASCC3	chr6:100956607-101329224	IPF	CTRL	OK	24.5051	11.3637	1.10865	2.15644	-1.68892	5e-05	0.000459061	yes	IPF vs CONTROL UP	unique	21.4092	26.5656	17.4728	31.0354	27.1171	23.4305	13.1985	10.7434	10.6202	10.7867	11.4695
ASCL1	ASCL1	ASCL1	chr12:103351451-103354294	IPF	CTRL	NOTEST	0.0873107	0.0949062	-0.120344	-1.08699	0	1	1	no	IPF vs CONTROL DOWN	unique	0	0	0.286653	0	0.101007	0.136204	0.211497	0.122218	0	0.0620633	0.0787526
ASCL2	ASCL2	ASCL2	chr11:2289727-2292182	IPF	CTRL	NOTEST	0.724826	0.66395	0.12656	1.09169	0	1	1	no	IPF vs CONTROL UP	unique	0.963618	0.731452	0.685673	0.671844	0.552268	0.744102	0.371641	0.834518	0.772892	1.01786	0.322841
ASCL3	ASCL3	ASCL3	chr11:8959118-8964580	IPF	CTRL	NOTEST	0.801439	0.604049	0.407927	1.32678	0	1	1	no	IPF vs CONTROL UP	unique	1.03869	1.18279	0.637487	0	1.34827	0.6014	0.805484	0.539024	0.499105	0.827265	0.349369
ASCL4	ASCL4	ASCL4	chr12:108168161-108170421	IPF	CTRL	NOTEST	0.0678793	0.0066745	3.34624	10.17	0	1	1	no	IPF vs CONTROL UP	unique	0	0.295705	0	0	0.111571	0	0.0333725	0	0	0	0
ASCL5	ASCL5	ASCL5	chr1:201083080-201084500	IPF	CTRL	NOTEST	0.654383	0.364677	0.843517	1.79442	0	1	1	no	IPF vs CONTROL UP	unique	0.213327	0.971596	0	0.891716	0.36714	1.48252	0.274463	0.443309	0	0.676537	0.429075
ASF1A	ASF1A	ASF1A	chr6:119134611-119256327	IPF	CTRL	OK	10.5789	8.49788	0.316018	1.24489	-0.142384	0.7306	0.847982	no	IPF vs CONTROL UP	unique	11.0587	10.3382	9.64834	11.045	7.89939	13.4839	8.76378	9.55852	6.61166	8.35588	9.19956
ASF1B	ASF1B	ASF1B	chr19:14230320-14247440	IPF	CTRL	OK	3.03751	1.06994	1.50537	2.83897	-1.1211	0.0126	0.0469101	yes	IPF vs CONTROL UP	unique	3.27403	0.981009	3.88942	4.08411	4.00057	1.99593	1.72821	0.53721	0.497535	1.54742	1.0393
ASGR1	ASGR1	ASGR1	chr17:7076750-7082883	IPF	CTRL	NOTEST	0.843771	0.822879	0.0361706	1.02539	0	1	1	no	IPF vs CONTROL UP	unique	0.876081	1.74569	0.401151	1.22058	0.565462	0.253661	1.2405	0.455117	0.843009	0.694657	0.881113
ASGR2	ASGR2	ASGR2	chr17:7004640-7018130	IPF	CTRL	NOTEST	0.524043	0.45375	0.207788	1.15492	0	1	1	no	IPF vs CONTROL UP	unique	0.256029	0.583062	0.625678	0.356512	1.32298	0	0.131847	0.683739	0	1.10969	0.343476
ASH1L	ASH1L	ASH1L	chr1:155305051-155533735	IPF	CTRL	OK	44.113	30.6186	0.526798	1.44073	-0.589595	0.1654	0.326044	no	IPF vs CONTROL UP	unique	40.1038	48.7998	39.5353	55.1726	39.603	41.4636	30.9585	33.947	32.8653	23.8243	31.4977
ASH1L-AS1	ASH1L-AS1	ASH1L-AS1	chr1:155305051-155533735	IPF	CTRL	OK	5.64048	5.12419	0.138494	1.10076	0.0492918	0.90585	0.953086	no	IPF vs CONTROL UP	unique	5.94747	6.37024	3.22492	6.9872	5.59419	5.71887	3.33802	5.68202	5.00371	4.55692	7.04029
ASH2L	ASH2L	ASH2L	chr8:37963010-37997598	IPF	CTRL	OK	11.3658	11.8242	-0.0570384	-1.04033	0.421772	0.32525	0.518327	no	IPF vs CONTROL DOWN	unique	9.82892	12.3667	11.1555	12.1368	11.0348	11.6723	11.5307	14.9333	8.88079	13.0667	10.7095
ASIC1	ASIC1	ASIC1	chr12:50451419-50477405	IPF	CTRL	OK	2.22554	0.404392	2.46033	5.50341	-1.94743	5e-05	0.000459061	yes	IPF vs CONTROL UP	unique	1.25686	3.27543	1.40612	1.24784	3.23357	2.9334	0.52378	0.0816462	0.286826	0.235708	0.894002
ASIC2	ASIC2	ASIC2	chr17:31340105-32483825	IPF	CTRL	NOTEST	0.118297	0.0697603	0.761938	1.69577	0	1	1	no	IPF vs CONTROL UP	unique	0.191931	0	0.131845	0.116908	0.143787	0.125312	0.123744	0	0.0806304	0.0883596	0.0560673
ASIC3	ASIC3	ASIC3	chr7:150745378-150749843	IPF	CTRL	NOTEST	0.972967	0.90008	0.112339	1.08098	0	1	1	no	IPF vs CONTROL UP	unique	0.959935	1.24912	0.41802	0.765132	1.65139	0.794208	0.810384	0.997679	0.395991	0.624225	1.67212
ASIC4	ASIC4	ASIC4	chr2:220378891-220403494	IPF	CTRL	NOTEST	0.511388	0.731512	-0.516464	-1.43044	0	1	1	no	IPF vs CONTROL DOWN	unique	0.918763	0.464928	0.124398	0.854826	0.350664	0.354747	0.340921	1.06112	0.393119	0.700299	1.1621
ASIC5	ASIC5	ASIC5	chr4:156750880-156787425	IPF	CTRL	NOTEST	0	0	0	1	0	1	1	no	IPF vs. CONTROL EQUAL(0)	unique	0	0	0	0	0	0	0	0	0	0	0
ASIP	ASIP	ASIP	chr20:32848170-32857148	IPF	CTRL	NOTEST	0.159341	0.26693	-0.744342	-1.67521	0	1	1	no	IPF vs CONTROL DOWN	unique	0.592153	0	0.363894	0	0	0	0.30647	0	0	0.629511	0.398669
ASL	ASL	ASL	chr7:65540775-65558329	IPF	CTRL	OK	9.57231	11.2072	-0.22749	-1.1708	0.51835	0.22515	0.403215	no	IPF vs CONTROL DOWN	unique	10.2928	8.83231	9.70558	5.40894	17.6652	5.52902	13.8132	8.1617	9.61998	9.99703	14.4442
ASMT	ASMT	ASMT	chrY:1660485-1711974	IPF	CTRL	NOTEST	0	0	0	1	0	1	1	no	IPF vs. CONTROL EQUAL(0)	multiple	0	0	0	0	0	0	0	0	0	0	0
ASMTL	ASMTL	ASMTL	chrY:1469423-1522655	IPF	CTRL	NOTEST	0	0	0	1	0	1	1	no	IPF vs. CONTROL EQUAL(0)	multiple	0	0	0	0	0	0	0	0	0	0	0
ASMTL-AS1	ASMTL-AS1	ASMTL-AS1	chrY:1469423-1522655	IPF	CTRL	NOTEST	0.0121993	0.0127427	-0.0628819	-1.04455	0	1	1	no	IPF vs CONTROL DOWN	multiple	0	0	0	0	0	0.0731955	0.0213878	0	0	0	0.0423259
ASNA1	ASNA1	ASNA1	chr19:12848305-12859137	IPF	CTRL	OK	11.1701	15.3439	-0.458018	-1.37365	0.793335	0.063	0.160482	no	IPF vs CONTROL DOWN	unique	14.3354	9.79367	11.09	7.32115	16.4555	8.02514	16.4827	15.1419	10.5747	17.055	17.4652
ASNS	ASNS	ASNS	chr7:97481428-97501854	IPF	CTRL	OK	14.2914	6.79548	1.0725	2.10307	-1.55906	0.0003	0.00220617	yes	IPF vs CONTROL UP	unique	10.3452	11.1764	15.1125	21.7495	13.5643	13.8004	6.86823	6.73609	8.78571	5.36677	6.22061
ASNSD1	ASNSD1	ASNSD1	chr2:190526124-190535557	IPF	CTRL	OK	14.0275	13.404	0.0655948	1.04652	0.126316	0.7675	0.872494	no	IPF vs CONTROL UP	unique	11.3505	12.9236	14.628	15.8372	13.8128	15.6128	14.3701	14.747	13.4307	12.3564	12.1157
ASPA	ASPA	ASPA	chr17:3377403-3402700	IPF	CTRL	OK	4.61096	4.09061	0.172751	1.12721	-0.0783197	0.8557	0.925046	no	IPF vs CONTROL UP	unique	4.91412	3.89235	3.39119	10.4193	2.57416	2.47466	3.51857	3.99589	6.37399	2.93618	3.62843
ASPDH	ASPDH	ASPDH	chr19:51014856-51017947	IPF	CTRL	OK	1.85031	1.68349	0.136308	1.09909	0.223998	0.60805	0.764808	no	IPF vs CONTROL UP	unique	2.67419	2.15971	1.09868	2.46965	1.38147	1.31814	1.12984	0.393957	1.70788	1.02117	4.16461
ASPG	ASPG	ASPG	chr14:104552022-104579046	IPF	CTRL	OK	0.314697	2.3708	-2.91334	-7.5336	2.54146	5e-05	0.000459061	yes	IPF vs CONTROL DOWN	unique	0.299951	0.170762	0.274364	0.627484	0.515622	0	1.42653	1.40279	3.03148	2.3759	3.61731
ASPH	ASPH	ASPH	chr8:62200524-62627199	IPF	CTRL	OK	54.43	44.4088	0.293558	1.22566	-0.203944	0.6407	0.788331	no	IPF vs CONTROL UP	unique	69.3937	45.7443	58.8837	44.6908	49.9428	57.9248	48.638	42.4741	51.2361	36.9808	42.7148
ASPHD1	ASPHD1	ASPHD1	chr16:29912146-29917377	IPF	CTRL	NOTEST	0.629982	0.625724	0.00978447	1.00681	0	1	1	no	IPF vs CONTROL UP	unique	1.22557	0	0.748054	0.569289	0.527219	0.709762	0.315316	0.636724	0.786251	0.431799	0.958531
ASPHD2	ASPHD2	ASPHD2	chr22:26825279-26840978	IPF	CTRL	OK	2.30336	0.771656	1.57771	2.98495	-1.35499	0.0023	0.0119529	yes	IPF vs CONTROL UP	unique	2.61366	2.67826	1.6982	1.33777	2.76746	2.72479	1.09642	0.452819	0.419399	0.781374	1.10827
ASPM	ASPM	ASPM	chr1:197053256-197115824	IPF	CTRL	NOTEST	0.758286	0.209304	1.85714	3.62289	0	1	1	no	IPF vs CONTROL UP	unique	0.827935	0.559751	0.834379	0.722989	0.976276	0.628386	0.249767	0.134503	0.174416	0.245479	0.242357
ASPN	ASPN	ASPN	chr9:95059639-95432547	IPF	CTRL	OK	21.8595	9.50936	1.20084	2.29874	-0.754528	0.0971	0.221465	no	IPF vs CONTROL UP	unique	22.5265	30.6147	32.3252	10.7119	11.5458	23.4332	9.71573	11.0583	8.34893	5.41006	13.0138
ASPRV1	ASPRV1	ASPRV1	chr2:70187223-70314147	IPF	CTRL	OK	3.06012	3.04469	0.00729351	1.00507	0.0810014	0.85095	0.923205	no	IPF vs CONTROL UP	unique	2.02912	3.3885	2.63901	5.47229	2.32477	2.50705	2.43376	4.07724	2.60428	3.57091	2.53727
ASPSCR1	ASPSCR1	ASPSCR1	chr17:79935425-79975282	IPF	CTRL	OK	6.01574	8.90216	-0.565414	-1.47981	0.967321	0.02375	0.0772908	no	IPF vs CONTROL DOWN	unique	6.74281	4.10306	6.59335	7.53831	6.4381	4.67881	8.826	10.5508	6.73279	10.086	8.31522
ASRGL1	ASRGL1	ASRGL1	chr11:62104773-62160887	IPF	CTRL	OK	2.39839	8.79519	-1.87465	-3.66712	2.88917	5e-05	0.000459061	yes	IPF vs CONTROL DOWN	unique	2.90215	2.42101	2.05845	4.04844	0.859624	2.10068	6.3416	8.8401	11.9616	10.5796	6.25304
ASS1	ASS1	ASS1	chr9:133320093-133376661	IPF	CTRL	OK	7.50658	6.12161	0.294243	1.22624	-0.372069	0.3834	0.574909	no	IPF vs CONTROL UP	unique	12.4989	4.93346	8.94545	3.253	7.88051	7.52815	5.61367	5.88827	6.89698	6.51381	5.69534
ASTE1	ASTE1	ASTE1	chr3:130569368-130745646	IPF	CTRL	OK	7.54476	4.72855	0.674076	1.59557	-0.281525	0.5027	0.679529	no	IPF vs CONTROL UP	unique	6.77065	7.04894	5.62111	11.3784	5.55565	8.89382	5.3813	5.09418	4.44881	5.00255	3.71593
ASTL	ASTL	ASTL	chr2:96789588-96804175	IPF	CTRL	NOTEST	0.292049	0.301804	-0.0474017	-1.0334	0	1	1	no	IPF vs CONTROL DOWN	unique	0	0	0.143939	0.656587	0.405797	0.545973	0.546009	0	0.680336	0.124619	0.158058
ASTN1	ASTN1	ASTN1	chr1:176830202-177134024	IPF	CTRL	NOTEST	0.646162	0.186419	1.79335	3.46619	0	1	1	no	IPF vs CONTROL UP	unique	0.851712	0.505641	0.801115	0.2704	0.730564	0.717538	0.178885	0.230949	0.149124	0.224509	0.148626
ASTN2	ASTN2	ASTN2	chr9:119187503-120177317	IPF	CTRL	OK	7.06891	2.7338	1.37058	2.58575	-0.878591	0.05655	0.147779	no	IPF vs CONTROL UP	unique	5.69816	7.01622	4.86728	4.85169	13.5286	6.45154	2.35356	2.99266	1.65559	1.98004	4.68713
ASUN	ASUN	ASUN	chr12:27058111-27091254	IPF	CTRL	OK	4.21716	3.16411	0.414473	1.33281	-0.488438	0.2446	0.426551	no	IPF vs CONTROL UP	unique	3.40822	3.65879	3.79689	4.8928	5.93678	3.60951	3.12672	4.25128	4.125	1.64421	2.67335
ASXL1	ASXL1	ASXL1	chr20:30946146-31027122	IPF	CTRL	OK	40.6291	30.6149	0.40828	1.3271	-0.307582	0.4183	0.607267	no	IPF vs CONTROL UP	unique	40.6944	45.869	27.903	49.7955	39.9331	39.5796	28.5175	29.733	34.2319	30.0204	30.5716
ASXL2	ASXL2	ASXL2	chr2:25962252-26101312	IPF	CTRL	OK	18.0763	13.2699	0.445934	1.3622	-0.521697	0.2209	0.398146	no	IPF vs CONTROL UP	unique	17.2534	16.7222	17.0369	19.7994	18.2539	19.3917	14.9564	13.546	11.9003	11.4689	14.4781
ASXL3	ASXL3	ASXL3	chr18:31158540-31327399	IPF	CTRL	NOTEST	1.35756	0.760614	0.835784	1.78483	0	1	1	no	IPF vs CONTROL UP	unique	0.851629	1.0961	1.26195	1.13795	1.52446	2.27329	0.836247	0.731444	0.748797	0.644166	0.842414
ASZ1	ASZ1	ASZ1	chr7:117003275-117067577	IPF	CTRL	NOTEST	0.0889134	0.0464856	0.935618	1.91271	0	1	1	no	IPF vs CONTROL UP	unique	0.0993914	0	0.097055	0.221904	0	0.11513	0.0818302	0	0	0.0840443	0.0665534
ATAD1	ATAD1	ATAD1	chr10:89512874-89577917	IPF	CTRL	OK	15.1696	14.4636	0.0687508	1.04881	0.315985	0.4409	0.627343	no	IPF vs CONTROL UP	unique	17.848	12.1711	16.0484	17.3181	12.375	15.2569	15.5679	15.0802	12.4969	13.8993	15.2739
ATAD2	ATAD2	ATAD2	chr8:124332090-124408705	IPF	CTRL	OK	3.96638	2.58138	0.619683	1.53654	-0.84996	0.0449	0.124326	no	IPF vs CONTROL UP	unique	3.93803	3.02795	3.08221	5.00007	3.77357	4.97646	3.479	2.33951	2.36388	2.1574	2.56709
ATAD2B	ATAD2B	ATAD2B	chr2:23971533-24149936	IPF	CTRL	OK	16.5214	8.25161	1.00159	2.0022	-1.69829	0.00015	0.00122565	yes	IPF vs CONTROL UP	unique	16.0794	17.6979	11.792	22.3446	13.8517	17.3626	8.48241	8.79539	7.82308	6.78548	9.37168
ATAD3A	ATAD3A	ATAD3A	chr1:1447522-1470067	IPF	CTRL	OK	4.64798	3.55601	0.386344	1.30708	-0.345718	0.4156	0.604505	no	IPF vs CONTROL UP	unique	4.65094	4.25211	2.34715	1.62831	8.52087	6.48851	2.37341	3.92288	3.81992	4.04602	3.61783
ATAD3B	ATAD3B	ATAD3B	chr1:1407163-1431582	IPF	CTRL	OK	11.4131	6.41416	0.831363	1.77937	-1.00697	0.01895	0.0648168	no	IPF vs CONTROL UP	unique	10.3347	13.2721	5.49316	15.2578	11.8717	12.2494	4.47749	7.74405	7.17236	5.83558	6.84133
ATAD3C	ATAD3C	ATAD3C	chr1:1385068-1405538	IPF	CTRL	NOTEST	0.968808	1.25373	-0.371946	-1.2941	0	1	1	no	IPF vs CONTROL DOWN	unique	1.19076	0.677885	0.634524	1.24689	0.511029	1.55176	0.840869	1.54733	1.43314	0.902889	1.54443
ATAD5	ATAD5	ATAD5	chr17:29159022-29222295	IPF	CTRL	OK	3.44063	1.69055	1.02519	2.03522	-1.4805	0.0003	0.00220617	yes	IPF vs CONTROL UP	unique	3.59336	2.90013	2.63023	5.2097	3.04361	3.26678	1.52943	2.08074	1.62062	1.48689	1.73505
ATAT1	ATAT1	ATAT1	chr6_ssto_hap7:1926891-1946878	IPF	CTRL	OK	1.2078	0.657304	0.877744	1.8375	-0.943849	0.02845	0.0884262	no	IPF vs CONTROL UP	multiple	0.834023	1.8006	0.644376	1.02907	1.09179	1.84691	0.562486	0.776354	0.620091	0.494844	0.832744
ATCAY	ATCAY	ATCAY	chr19:3880617-3928080	IPF	CTRL	NOTEST	0.0674687	0.0813587	-0.270079	-1.20587	0	1	1	no	IPF vs CONTROL DOWN	unique	0.0566287	0	0.137904	0.0790845	0	0.131195	0.0436128	0.0588723	0.109057	0.119449	0.0758026
ATE1	ATE1	ATE1	chr10:123502624-123687546	IPF	CTRL	OK	11.1444	11.0152	0.0168215	1.01173	0.157858	0.7145	0.838126	no	IPF vs CONTROL UP	unique	10.1092	10.6015	9.40627	11.3188	9.71489	15.7156	14.8368	12.0275	8.96285	9.26945	9.97935
ATF1	ATF1	ATF1	chr12:51157788-51214943	IPF	CTRL	OK	6.39405	6.64972	-0.0565628	-1.03999	0.493196	0.2395	0.420659	no	IPF vs CONTROL DOWN	unique	6.0608	5.30827	5.68263	6.0173	8.40991	6.8854	8.83469	5.69384	5.49792	6.27478	6.94736
ATF2	ATF2	ATF2	chr2:175936977-176032934	IPF	CTRL	OK	22.4953	16.0503	0.487026	1.40155	-0.569753	0.18255	0.349526	no	IPF vs CONTROL UP	unique	18.3484	23.4987	25.4632	25.0798	20.2688	22.313	18.1697	14.2986	18.5443	13.2047	16.0341
ATF3	ATF3	ATF3	chr1:212738675-212794119	IPF	CTRL	OK	20.027	98.7596	-2.30198	-4.93133	4.70092	5e-05	0.000459061	yes	IPF vs CONTROL DOWN	unique	31.9346	16.0351	11.406	11.5066	42.827	6.45251	155.734	15.3224	121.059	124.609	77.0734
ATF4	ATF4	ATF4	chr22:39916568-39918691	IPF	CTRL	OK	83.6727	101.485	-0.278431	-1.21288	1.19811	0.00485	0.0217697	yes	IPF vs CONTROL DOWN	unique	65.9097	84.743	83.2491	85.8889	87.624	94.6215	97.6097	88.6583	120.901	97.2848	102.969
ATF5	ATF5	ATF5	chr19:50392912-50437193	IPF	CTRL	OK	8.7509	7.61218	0.201122	1.14959	0.0457817	0.9127	0.956123	no	IPF vs CONTROL UP	unique	5.22312	10.4247	9.02123	5.7568	13.4658	8.61375	6.03107	7.78913	8.71828	5.39912	10.1233
ATF6	ATF6	ATF6	chr1:161736033-161933860	IPF	CTRL	OK	15.2625	16.2628	-0.0915812	-1.06554	0.462557	0.274	0.460947	no	IPF vs CONTROL DOWN	unique	13.8771	13.9637	17.9641	13.8317	14.7339	17.2047	15.8053	17.8593	19.2867	14.4339	13.9288
ATF6B	ATF6B	ATF6B	chr6_mcf_hap5:3462872-3475845	IPF	CTRL	OK	7.66177	6.44738	0.248965	1.18835	-0.0656001	0.8745	0.935633	no	IPF vs CONTROL UP	multiple	7.54558	8.65938	7.21188	6.8244	7.70132	8.02805	7.16873	5.75145	6.05842	6.83878	6.4195
ATF7	ATF7	ATF7	chr12:53901639-54020199	IPF	CTRL	OK	38.2043	29.641	0.366141	1.2889	-0.272281	0.4282	0.61663	no	IPF vs CONTROL UP	unique	42.6967	36.561	40.5674	37.8852	28.2156	43.3001	29.4889	31.621	26.6612	29.5369	30.8971
ATF7IP	ATF7IP	ATF7IP	chr12:14518610-14651697	IPF	CTRL	OK	48.2169	29.4511	0.711218	1.63719	-1.17958	0.00565	0.0245742	yes	IPF vs CONTROL UP	unique	39.1696	52.1347	39.1506	62.3167	45.9733	50.5566	31.5693	32.3727	27.0918	27.5426	28.6791
ATF7IP2	ATF7IP2	ATF7IP2	chr16:10479911-10577495	IPF	CTRL	OK	14.3075	27.8605	-0.961448	-1.94726	2.25137	5e-05	0.000459061	yes	IPF vs CONTROL DOWN	unique	12.9313	9.75132	13.2533	29.8909	7.56877	12.4494	21.8013	21.9099	53.1979	18.1626	24.2306
ATG10	ATG10	ATG10	chr5:81267843-81551216	IPF	CTRL	OK	3.21448	2.30817	0.477836	1.39265	-0.0246147	0.9543	0.977515	no	IPF vs CONTROL UP	unique	1.53606	3.64367	2.41888	2.14297	1.98335	7.56192	2.79701	1.99566	3.36551	1.15166	2.23099
ATG12	ATG12	ATG12	chr5:115163893-115177548	IPF	CTRL	OK	11.9853	6.72151	0.834405	1.78312	-1.1337	0.00785	0.0319076	yes	IPF vs CONTROL UP	unique	10.5146	10.5907	12.4878	15.9405	9.15391	13.2241	7.54923	8.20526	6.71232	4.53677	6.60397
ATG13	ATG13	ATG13	chr11:46638825-46697568	IPF	CTRL	OK	12.0636	12.2666	-0.0240783	-1.01683	0.294249	0.49185	0.670246	no	IPF vs CONTROL DOWN	unique	11.8458	12.5098	11.6463	9.38065	13.8895	13.1095	10.2833	12.7664	11.3293	13.9813	12.9728
ATG14	ATG14	ATG14	chr14:55833108-55878576	IPF	CTRL	OK	15.0236	11.0011	0.449574	1.36564	-0.421047	0.31235	0.504778	no	IPF vs CONTROL UP	unique	14.8123	14.8081	12.6111	19.2555	12.1937	16.4607	11.6248	11.0171	10.1462	10.2883	11.9293
ATG16L1	ATG16L1	ATG16L1	chr2:234160216-234204320	IPF	CTRL	OK	13.7451	8.25201	0.736096	1.66566	-0.244299	0.6289	0.780082	no	IPF vs CONTROL UP	unique	14.0244	11.0047	10.6757	15.1311	15.8504	15.7841	10.1701	9.40731	6.55616	9.18356	5.94292
ATG16L2	ATG16L2	ATG16L2	chr11:72525450-72540680	IPF	CTRL	OK	20.125	20.1617	-0.00263137	-1.00183	0.230456	0.57745	0.74071	no	IPF vs CONTROL DOWN	unique	18.1111	25.9328	14.4713	26.4115	19.4538	16.3695	23.8746	21.9604	17.0372	22.3114	15.6251
ATG2A	ATG2A	ATG2A	chr11:64662003-64684722	IPF	CTRL	OK	7.5793	9.3469	-0.302425	-1.23322	0.633917	0.1283	0.270285	no	IPF vs CONTROL DOWN	unique	8.81766	9.17747	5.93637	8.02434	6.76199	6.75794	9.25872	10.2786	7.93356	12.0217	7.24193
ATG2B	ATG2B	ATG2B	chr14:96747594-96829678	IPF	CTRL	OK	17.5023	11.0507	0.663408	1.58382	-1.06653	0.0134	0.049271	yes	IPF vs CONTROL UP	unique	15.809	20.4263	13.4023	21.8753	15.2762	18.225	12.2478	12.0575	9.4085	11.3021	10.2377
ATG3	ATG3	ATG3	chr3:112251358-112280485	IPF	CTRL	OK	8.5593	11.3534	-0.407564	-1.32644	0.778421	0.06275	0.160034	no	IPF vs CONTROL DOWN	unique	6.42115	9.56099	11.465	6.19096	9.99451	7.72318	17.739	10.2631	6.89087	12.9296	8.94457
ATG4A	ATG4A	ATG4A	chrX:107334898-107397901	IPF	CTRL	OK	3.72452	3.03903	0.293441	1.22556	-0.0632418	0.8846	0.941545	no	IPF vs CONTROL UP	unique	2.76914	4.10096	3.08845	4.25767	4.90054	3.23035	4.39457	2.58844	1.73463	3.67766	2.79987
ATG4B	ATG4B	ATG4B	chr2:242577026-242613271	IPF	CTRL	OK	21.7235	15.6764	0.470658	1.38574	-0.755954	0.08005	0.192795	no	IPF vs CONTROL UP	unique	19.9281	29.5209	15.7149	24.3192	18.6906	22.1671	16.532	14.3638	12.4296	19.995	15.0617
ATG4C	ATG4C	ATG4C	chr1:63249776-63330941	IPF	CTRL	OK	4.97587	2.77533	0.842288	1.79289	-1.04221	0.01615	0.0569763	no	IPF vs CONTROL UP	unique	3.69835	5.94486	4.70615	5.00918	5.96074	4.53594	4.55671	3.0527	2.72265	1.57781	1.96679
ATG4D	ATG4D	ATG4D	chr19:10654646-10676702	IPF	CTRL	OK	7.64528	6.58446	0.215504	1.16111	0.004275	0.9922	0.99646	no	IPF vs CONTROL UP	unique	7.69843	6.60264	6.40463	8.63249	5.34849	11.185	6.33066	5.13788	5.49014	8.4197	7.54392
ATG5	ATG5	ATG5	chr6:106632351-106773695	IPF	CTRL	OK	11.5467	8.53936	0.435279	1.35217	-0.465551	0.26295	0.448316	no	IPF vs CONTROL UP	unique	9.17133	12.9768	12.8006	11.4349	10.932	11.9645	10.703	9.07079	7.97268	7.14058	7.80977
ATG7	ATG7	ATG7	chr3:11314009-11762220	IPF	CTRL	OK	15.4263	11.4782	0.4265	1.34397	-0.334755	0.42405	0.612764	no	IPF vs CONTROL UP	unique	13.9328	18.63	12.4087	17.6837	15.4441	14.4588	14.1464	9.11773	11.5021	11.2385	11.3863
ATG9A	ATG9A	ATG9A	chr2:220084101-220094361	IPF	CTRL	OK	17.2414	18.8481	-0.128541	-1.09319	0.603093	0.1571	0.313931	no	IPF vs CONTROL DOWN	unique	17.4673	17.6833	17.0824	17.4761	15.1222	18.6172	15.8179	19.5609	16.8881	24.5354	17.4382
ATG9B	ATG9B	ATG9B	chr7:150688143-150721586	IPF	CTRL	OK	1.59342	0.949097	0.747501	1.67888	-0.343846	0.4565	0.641097	no	IPF vs CONTROL UP	unique	2.50244	2.21728	0.917142	0.811479	1.56485	1.54734	1.06113	0.558806	1.36709	0.598407	1.16005
ATHL1	ATHL1	ATHL1	chr11:289137-295688	IPF	CTRL	OK	76.2244	63.2188	0.269898	1.20572	-0.0938205	0.8226	0.907286	no	IPF vs CONTROL UP	unique	44.7125	57.6495	41.8234	134.326	67.3679	111.467	32.2503	93.233	60.8292	77.4819	52.2998
ATIC	ATIC	ATIC	chr2:216176678-216214496	IPF	CTRL	OK	7.68137	6.10037	0.332468	1.25917	-0.54957	0.19785	0.369572	no	IPF vs CONTROL UP	unique	7.07261	6.92545	8.88317	8.28657	6.56428	8.35613	8.83526	6.17449	5.99091	5.90023	3.60094
ATL1	ATL1	ATL1	chr14:50999799-51099784	IPF	CTRL	OK	3.04355	3.30403	-0.118472	-1.08558	0.173706	0.6835	0.817104	no	IPF vs CONTROL DOWN	unique	2.37419	2.90044	2.97408	2.73703	3.81161	3.46396	4.66709	2.53269	2.98553	2.92276	3.41209
ATL2	ATL2	ATL2	chr2:38522028-38604432	IPF	CTRL	OK	24.4271	18.5556	0.396625	1.31642	-0.46271	0.2749	0.461794	no	IPF vs CONTROL UP	unique	23.7893	19.6834	25.8501	26.5427	21.9402	28.7569	26.5218	16.1798	16.5629	13.1924	20.3213
ATL3	ATL3	ATL3	chr11:63396436-63439083	IPF	CTRL	OK	27.4934	30.4316	-0.146486	-1.10687	0.612534	0.14545	0.295823	no	IPF vs CONTROL DOWN	unique	29.7924	25.6262	39.5736	17.7862	30.1806	22.0015	34.1036	33.2633	28.0524	35.3014	21.4375
ATM	ATM	ATM	chr11:108093558-108239826	IPF	CTRL	OK	31.4662	14.9009	1.07841	2.1117	-1.72528	5e-05	0.000459061	yes	IPF vs CONTROL UP	unique	23.4202	39.5716	24.1789	39.8967	30.5366	31.1935	20.382	15.0332	13.4506	13.1893	12.4493
ATMIN	ATMIN	ATMIN	chr16:81069457-81080951	IPF	CTRL	OK	12.3078	9.60316	0.357992	1.28164	-0.244929	0.55125	0.71947	no	IPF vs CONTROL UP	unique	12.4347	11.2861	13.4271	9.91121	12.1798	14.6079	10.0136	9.81741	9.71428	8.97011	9.50041
ATN1	ATN1	ATN1	chr12:7033625-7051484	IPF	CTRL	OK	57.3573	70.2918	-0.293379	-1.22551	1.02088	0.0166	0.0583059	no	IPF vs CONTROL DOWN	unique	53.5695	60.2423	51.4756	61.645	51.5709	65.6403	42.379	76.7879	77.4027	72.4568	82.4324
ATOH1	ATOH1	ATOH1	chr4:94750077-94751142	IPF	CTRL	NOTEST	0	0	0	1	0	1	1	no	IPF vs. CONTROL EQUAL(0)	unique	0	0	0	0	0	0	0	0	0	0	0
ATOH7	ATOH7	ATOH7	chr10:69990351-69991870	IPF	CTRL	NOTEST	0.14375	0.132704	0.115354	1.08324	0	1	1	no	IPF vs CONTROL UP	unique	0	0	0.121027	0	0.511786	0.229688	0.102031	0	0.190835	0.104792	0.265861
ATOH8	ATOH8	ATOH8	chr2:85980908-86018506	IPF	CTRL	OK	9.12439	21.3342	-1.22537	-2.33815	2.88159	5e-05	0.000459061	yes	IPF vs CONTROL DOWN	unique	11.7815	7.06583	12.4545	9.68364	6.572	7.18885	15.3697	26.06	14.4263	17.946	32.8688
ATOX1	ATOX1	ATOX1	chr5:151122382-151138210	IPF	CTRL	OK	15.8177	20.7595	-0.392228	-1.31242	0.468936	0.27775	0.465292	no	IPF vs CONTROL DOWN	unique	18.5464	15.207	24.6829	1.02574	19.9834	15.4608	25.7823	23.85	22.7929	19.3653	12.0068
ATP10A	ATP10A	ATP10A	chr15:25923859-26108349	IPF	CTRL	OK	7.59872	9.48426	-0.319779	-1.24814	0.867738	0.0414	0.116965	no	IPF vs CONTROL DOWN	unique	11.16	6.94204	6.03179	9.73172	5.23144	6.49531	12.9688	8.88564	11.1131	8.29625	6.15751
ATP10B	ATP10B	ATP10B	chr5:159990126-160279219	IPF	CTRL	NOTEST	0.363848	0.0679628	2.42052	5.35364	0	1	1	no	IPF vs CONTROL UP	unique	0.22443	0.723991	0.136589	0.313514	0.481257	0.303308	0.124797	0	0.0360205	0.0788774	0.100119
ATP10D	ATP10D	ATP10D	chr4:47487409-47595503	IPF	CTRL	OK	11.9492	9.25847	0.368065	1.29062	-0.45384	0.2884	0.477275	no	IPF vs CONTROL UP	unique	9.74453	13.2644	11.0715	15.3052	10.0682	12.2412	9.4486	8.55514	12.7201	8.69971	6.8688
ATP11A	ATP11A	ATP11A	chr13:113344642-113541482	IPF	CTRL	OK	37.3309	60.1813	-0.688944	-1.6121	1.52096	0.0004	0.00281058	yes	IPF vs CONTROL DOWN	unique	54.0509	20.8301	51.7415	52.5136	16.4923	28.3572	57.1698	64.7344	49.3421	61.5547	68.1056
ATP11B	ATP11B	ATP11B	chr3:182511290-182639421	IPF	CTRL	OK	17.2818	15.3891	0.167345	1.12299	0.0318728	0.9383	0.968888	no	IPF vs CONTROL UP	unique	17.2134	14.842	18.5043	19.4526	17.0544	16.624	18.2768	14.5585	17.4702	13.4389	13.201
ATP11C	ATP11C	ATP11C	chrX:138808504-138914447	IPF	CTRL	OK	8.70559	4.49757	0.952796	1.93562	-1.39515	0.00105	0.00624762	yes	IPF vs CONTROL UP	unique	9.68644	10.0049	8.91504	7.45765	8.06877	8.10075	5.29095	4.37208	5.73302	3.13912	3.95269
ATP12A	ATP12A	ATP12A	chr13:25254548-25285923	IPF	CTRL	OK	1.71498	0.397792	2.1081	4.31124	-1.75151	0.02895	0.089521	no	IPF vs CONTROL UP	unique	2.01163	1.4975	0.141261	0.107761	4.56004	1.97168	0.397361	0	0	0.244809	1.34679
ATP13A1	ATP13A1	ATP13A1	chr19:19756009-19774503	IPF	CTRL	OK	15.8306	12.2193	0.373556	1.29554	-0.521437	0.21555	0.391719	no	IPF vs CONTROL UP	unique	14.1215	19.6324	13.443	13.0749	19.9035	14.8081	13.6841	9.88969	10.2333	14.7014	12.5878
ATP13A2	ATP13A2	ATP13A2	chr1:17312452-17338423	IPF	CTRL	OK	6.81571	10.4634	-0.618419	-1.53519	1.00625	0.0212	0.0705843	no	IPF vs CONTROL DOWN	unique	8.50485	7.68416	4.54708	5.63521	8.01099	6.51197	9.13697	10.6734	7.56414	14.6797	10.2629
ATP13A3	ATP13A3	ATP13A3	chr3:194123402-194188968	IPF	CTRL	OK	23.4796	21.0285	0.159062	1.11656	0.0747425	0.86225	0.929035	no	IPF vs CONTROL UP	unique	23.2992	20.4566	21.0941	23.3712	27.144	25.5126	21.2712	19.6442	30.6227	18.9443	14.6602
ATP13A4	ATP13A4	ATP13A4	chr3:193119865-193272696	IPF	CTRL	OK	27.4239	33.9874	-0.309567	-1.23934	0.832755	0.04835	0.131335	no	IPF vs CONTROL DOWN	unique	21.5739	7.32324	25.2535	49.9577	28.6923	31.7427	39.0844	31.2039	32.4495	39.2591	27.9401
ATP13A5	ATP13A5	ATP13A5	chr3:192992830-193096514	IPF	CTRL	NOTEST	0.201489	0.231221	-0.198569	-1.14756	0	1	1	no	IPF vs CONTROL DOWN	unique	0.235995	0	0.0479101	0.219647	0.0675251	0.637857	0.32322	0.3271	0.15148	0.248978	0.105325
ATP1A1	ATP1A1	ATP1A1	chr1:116915794-116961244	IPF	CTRL	OK	75.4052	141.325	-0.906278	-1.8742	2.02472	5e-05	0.000459061	yes	IPF vs CONTROL DOWN	unique	90.0707	41.0818	111.891	44.7425	103.299	61.3463	162.352	128.072	132.616	142.39	141.194
ATP1A1OS	ATP1A1OS	ATP1A1OS	chr1:116915794-116961244	IPF	CTRL	OK	9.81172	13.3834	-0.447873	-1.36403	0.204048	0.40145	0.591592	no	IPF vs CONTROL DOWN	unique	12.775	9.45992	11.2682	9.63386	7.20141	8.53191	17.3479	9.83236	12.4848	9.09269	18.1595
ATP1A2	ATP1A2	ATP1A2	chr1:160085519-160113374	IPF	CTRL	OK	13.9288	5.80306	1.26318	2.40025	-2.13068	5e-05	0.000459061	yes	IPF vs CONTROL UP	unique	14.5547	13.1265	26.3587	6.77587	5.59477	17.1621	5.83865	5.74892	5.17405	5.96921	6.28445
ATP1A3	ATP1A3	ATP1A3	chr19:42470733-42498428	IPF	CTRL	NOTEST	0.166807	0.117313	0.507819	1.4219	0	1	1	no	IPF vs CONTROL UP	unique	0.249418	0.283982	0.0506313	0.348189	0.0686217	0	0.170823	0.172844	0	0.131579	0.111318
ATP1A4	ATP1A4	ATP1A4	chr1:160121351-160156767	IPF	CTRL	NOTEST	0.65046	0.197207	1.72175	3.29835	0	1	1	no	IPF vs CONTROL UP	unique	0.718293	0.580782	0.883152	0.605796	1.02825	0.0864857	0.197409	0.749246	0	0.0393823	0
ATP1B1	ATP1B1	ATP1B1	chr1:169075946-169337186	IPF	CTRL	OK	75.9744	65.5477	0.212967	1.15907	0.000362203	0.99955	0.999616	no	IPF vs CONTROL UP	unique	107.003	30.4739	78.0221	45.1481	91.8052	103.394	90.9133	50.0475	50.963	61.7186	74.0963
ATP1B2	ATP1B2	ATP1B2	chr17:7554253-7561089	IPF	CTRL	OK	3.63252	4.10555	-0.176605	-1.13022	0.501431	0.241	0.422402	no	IPF vs CONTROL DOWN	unique	3.29109	5.12769	4.8007	1.93437	2.52803	4.11322	2.51353	5.76188	4.33601	3.33548	4.58083
ATP1B3	ATP1B3	ATP1B3	chr3:141595469-141645382	IPF	CTRL	OK	15.6501	31.2106	-0.995871	-1.99428	2.31327	5e-05	0.000459061	yes	IPF vs CONTROL DOWN	unique	23.3941	14.2305	16.8091	15.6404	11.0199	12.8063	30.9811	19.1498	56.1372	30.8887	18.8964
ATP1B4	ATP1B4	ATP1B4	chrX:119495939-119517104	IPF	CTRL	NOTEST	0.008567	0.0061515	0.477852	1.39267	0	1	1	no	IPF vs CONTROL UP	unique	0	0	0	0	0.051402	0	0.0307575	0	0	0	0
ATP2A1	ATP2A1	ATP2A1	chr16:28889808-28936532	IPF	CTRL	NOTEST	0.909273	0.723119	0.33048	1.25743	0	1	1	no	IPF vs CONTROL UP	unique	0.906967	0.469344	0.502213	1.72659	0.990942	0.85958	0.571747	0.599946	0.722516	0.78296	0.938425
ATP2A2	ATP2A2	ATP2A2	chr12:110719031-110788897	IPF	CTRL	OK	68.4631	43.003	0.670888	1.59205	-0.929293	0.03365	0.100189	no	IPF vs CONTROL UP	unique	68.5983	64.1129	71.8795	42.3622	85.7398	78.086	45.6472	36.9913	45.687	41.6041	45.0856
ATP2A3	ATP2A3	ATP2A3	chr17:3827162-3867758	IPF	CTRL	OK	36.2891	20.1304	0.85016	1.8027	-1.48155	0.00055	0.0036624	yes	IPF vs CONTROL UP	unique	33.8679	42.9055	22.9376	36.4585	44.9037	36.6617	20.0953	20.9217	13.3336	24.0945	22.2071
ATP2B1	ATP2B1	ATP2B1	chr12:89981825-90049844	IPF	CTRL	OK	15.8241	11.4134	0.471403	1.38646	-0.527851	0.2195	0.396471	no	IPF vs CONTROL UP	unique	14.5945	13.8551	16.814	23.5073	11.3238	14.8502	16.5326	8.65713	13.2497	8.97316	9.65425
ATP2B2	ATP2B2	ATP2B2	chr3:10365706-10547268	IPF	CTRL	NOTEST	0.210074	0.0741274	1.50282	2.83396	0	1	1	no	IPF vs CONTROL UP	unique	0.255915	0.327798	0.155736	0.134054	0.164611	0.222333	0.0246243	0.0665031	0.123214	0.134904	0.0213917
ATP2B3	ATP2B3	ATP2B3	chrX:152801579-152848387	IPF	CTRL	NOTEST	0.0842521	0.0161144	2.38636	5.22837	0	1	1	no	IPF vs CONTROL UP	unique	0	0.100632	0	0.0617157	0.189577	0.153588	0.0113406	0.0459363	0	0.0232951	0
ATP2B4	ATP2B4	ATP2B4	chr1:203595914-203713209	IPF	CTRL	OK	65.3614	63.4866	0.0419857	1.02953	0.290179	0.4996	0.676977	no	IPF vs CONTROL UP	unique	65.8443	60.9477	68.3565	64.4815	55.4856	77.0525	52.8515	70.3129	66.5739	66.4589	61.2358
ATP2C1	ATP2C1	ATP2C1	chr3:130569368-130745646	IPF	CTRL	OK	24.3149	29.2983	-0.268975	-1.20495	0.806002	0.0632	0.160748	no	IPF vs CONTROL DOWN	unique	28.8335	19.0584	29.0281	20.1923	25.9066	22.8704	37.4985	27.6098	25.128	30.3188	25.9362
ATP2C2	ATP2C2	ATP2C2	chr16:84402132-84497793	IPF	CTRL	OK	11.0034	12.1799	-0.146554	-1.10692	0.254425	0.5429	0.712254	no	IPF vs CONTROL DOWN	unique	11.3322	11.6414	6.38358	4.75769	22.5294	9.37625	18.4035	7.26285	13.9459	7.59662	13.6908
ATP4A	ATP4A	ATP4A	chr19:36041094-36054560	IPF	CTRL	NOTEST	0.0603405	0.0083106	2.8601	7.26067	0	1	1	no	IPF vs CONTROL UP	unique	0.0809021	0	0	0	0	0.281141	0.041553	0	0	0	0
ATP4B	ATP4B	ATP4B	chr13:114303121-114312513	IPF	CTRL	NOTEST	0.191811	0.206785	-0.108445	-1.07807	0	1	1	no	IPF vs CONTROL DOWN	unique	0	0.917529	0	0	0	0.233339	0.103658	0.418659	0	0.106463	0.405146
ATP5A1	ATP5A1	ATP5A1	chr18:43664109-43684199	IPF	CTRL	OK	48.7627	50.3137	-0.0451721	-1.03181	0.365375	0.39825	0.588422	no	IPF vs CONTROL DOWN	unique	47.9167	41.8047	65.0829	32.4052	65.3686	39.9981	57.6695	55.2864	39.6029	51.5363	47.4732
ATP5B	ATP5B	ATP5B	chr12:57031958-57039852	IPF	CTRL	OK	79.8406	98.1867	-0.298404	-1.22978	1.0007	0.0186	0.0639517	no	IPF vs CONTROL DOWN	unique	86.7041	64.7746	89.1527	53.2594	117.765	67.3881	104.338	104.174	86.3986	108.013	88.0098
ATP5C1	ATP5C1	ATP5C1	chr10:7830092-7849762	IPF	CTRL	OK	22.8455	30.1401	-0.399775	-1.3193	0.88902	0.03715	0.107834	no	IPF vs CONTROL DOWN	unique	18.7568	18.8073	29.6006	13.6391	28.6982	27.5709	39.5551	23.8465	25.5849	29.0312	32.6828
ATP5D	ATP5D	ATP5D	chr19:1241748-1244824	IPF	CTRL	OK	12.5188	24.8069	-0.986644	-1.98157	1.61112	0.0005	0.00338298	yes	IPF vs CONTROL DOWN	unique	20.8253	5.75327	17.2986	5.29017	18.9963	6.94908	22.7182	25.6323	27.329	22.6647	25.6901
ATP5E	ATP5E	ATP5E	chr20:57603732-57617901	IPF	CTRL	OK	22.389	28.4988	-0.348109	-1.27289	0.680602	0.11925	0.256571	no	IPF vs CONTROL DOWN	unique	23.9601	26.3125	27.4717	17.7183	23.0207	15.8509	50.8917	27.4993	27.9209	24.6588	11.5233
ATP5EP2	ATP5EP2	ATP5EP2	chr13:28519342-28519710	IPF	CTRL	OK	24.7437	29.7856	-0.267554	-1.20376	0.602122	0.1568	0.313497	no	IPF vs CONTROL DOWN	unique	32.8256	23.6781	25.7784	16.5572	30.6248	18.9983	39.3704	21.5329	38.813	24.0257	25.1862
ATP5F1	ATP5F1	ATP5F1	chr1:111982511-112004525	IPF	CTRL	OK	13.5761	13.1286	0.0483551	1.03409	0.187844	0.6572	0.799605	no	IPF vs CONTROL UP	unique	15.0059	11.976	14.8779	10.3676	15.9084	13.3205	15.8249	12.9722	13.9043	10.0703	12.8711
ATP5G1	ATP5G1	ATP5G1	chr17:46970147-46973232	IPF	CTRL	OK	9.59342	6.22898	0.623049	1.54013	-0.450185	0.29025	0.479289	no	IPF vs CONTROL UP	unique	12.6501	8.91769	10.367	7.51127	10.4417	7.67274	8.41901	5.0002	6.94451	6.72514	4.05604
ATP5G2	ATP5G2	ATP5G2	chr12:54058943-54070512	IPF	CTRL	OK	43.6924	37.6163	0.216026	1.16153	0.00825114	0.9849	0.993227	no	IPF vs CONTROL UP	unique	45.2467	39.5197	53.6602	25.6344	46.5241	51.5694	47.3417	42.4344	32.7835	33.2009	32.3209
ATP5G3	ATP5G3	ATP5G3	chr2:176040985-176046490	IPF	CTRL	OK	12.0732	10.3558	0.221368	1.16584	0.0290924	0.94635	0.972741	no	IPF vs CONTROL UP	unique	13.9428	10.2325	14.0555	9.91294	13.8741	10.4214	13.3035	13.8441	7.83003	9.75594	7.04551
ATP5H	ATP5H	ATP5H	chr17:73034954-73043074	IPF	CTRL	OK	12.3147	17.0468	-0.469125	-1.38427	0.872778	0.0423	0.118733	no	IPF vs CONTROL DOWN	unique	13.4077	8.76156	16.8228	10.6363	16.1303	8.12928	16.5785	20.5556	20.2213	14.2362	13.6424
ATP5I	ATP5I	ATP5I	chr4:666224-668127	IPF	CTRL	OK	28.3266	59.6647	-1.07472	-2.10631	1.30993	0.0025	0.0128077	yes	IPF vs CONTROL DOWN	unique	19.9301	32.0701	56.303	3.87961	55.2138	2.56328	60.3485	60.7784	49.8877	65.8331	61.4759
ATP5J	ATP5J	ATP5J	chr21:27096790-27144771	IPF	CTRL	OK	9.10294	12.9931	-0.513342	-1.42735	0.6813	0.12795	0.269735	no	IPF vs CONTROL DOWN	unique	7.3049	9.25534	12.0918	9.86267	8.93927	7.16364	13.7345	15.2723	12.1968	12.8885	10.8734
ATP5J2	ATP5J2	ATP5J2	chr7:99006600-99063824	IPF	CTRL	OK	17.8644	18.3692	-0.0402045	-1.02826	0.182439	0.6787	0.814377	no	IPF vs CONTROL DOWN	unique	17.6962	17.7237	24.1738	5.7006	23.1434	18.7487	28.5134	17.602	15.476	16.7215	13.5333
ATP5J2-PTCD1	ATP5J2-PTCD1	ATP5J2-PTCD1	chr7:99006600-99063824	IPF	CTRL	NOTEST	1.26588	1.74114	-0.459888	-1.37544	0	1	1	no	IPF vs CONTROL DOWN	unique	4.59121	2.8074	0.0207912	0.159134	0.000811793	0.0159508	0.000247319	3.88821	0.0653116	4.75157	0.000359931
ATP5L	ATP5L	ATP5L	chr11:118230295-118289530	IPF	CTRL	OK	20.4214	22.8298	-0.160841	-1.11794	0.265578	0.52225	0.695583	no	IPF vs CONTROL DOWN	unique	21.6229	19.178	28.7696	9.19504	21.3544	22.4083	24.1936	22.9388	21.4629	24.1865	21.3674
ATP5L2	ATP5L2	ATP5L2	chr22:43013845-43045405	IPF	CTRL	OK	3.15931	2.17987	0.535368	1.44931	-0.0548824	0.8492	0.921901	no	IPF vs CONTROL UP	unique	3.65854	2.31442	2.24097	4.51846	2.45732	3.76616	3.35686	2.1104	1.95425	1.29287	2.18497
ATP5O	ATP5O	ATP5O	chr21:35275756-35288158	IPF	CTRL	OK	38.6282	39.63	-0.0369383	-1.02593	0.351722	0.4073	0.596557	no	IPF vs CONTROL DOWN	unique	49.4948	16.4954	51.0179	13.9783	58.3753	42.4073	49.6335	46.3781	29.018	45.0039	28.1163
ATP5S	ATP5S	ATP5S	chr14:50779046-50792946	IPF	CTRL	OK	6.39434	6.32753	0.0151531	1.01056	0.30595	0.4725	0.654168	no	IPF vs CONTROL UP	unique	7.32508	4.98272	6.89834	6.04651	6.43111	6.68227	5.08535	6.34144	6.74573	6.14389	7.32123
ATP5SL	ATP5SL	ATP5SL	chr19:41937222-41945843	IPF	CTRL	OK	16.0294	19.4055	-0.275747	-1.21062	1.00059	0.0194	0.0659835	no	IPF vs CONTROL DOWN	unique	17.373	12.9857	13.9224	19.3091	13.9345	18.6514	17.0008	20.3163	19.2066	20.5445	19.9591
ATP6AP1	ATP6AP1	ATP6AP1	chrX:153656977-153664862	IPF	CTRL	OK	40.0185	45.0846	-0.171969	-1.12659	0.884271	0.04035	0.114726	no	IPF vs CONTROL DOWN	unique	39.3074	34.6854	44.2507	35.2461	45.4814	41.1399	62.2808	41.582	32.8364	49.8835	38.8404
ATP6AP1L	ATP6AP1L	ATP6AP1L	chr5:81601165-81614147	IPF	CTRL	OK	3.81249	2.17556	0.809346	1.75242	-0.716585	0.08595	0.203224	no	IPF vs CONTROL UP	unique	0.432353	4.92322	0.79485	3.60298	4.109	9.01253	1.89747	2.24439	1.24697	2.29269	3.19628
ATP6AP2	ATP6AP2	ATP6AP2	chrX:40440215-40465888	IPF	CTRL	OK	27.7798	35.087	-0.336899	-1.26304	1.14914	0.0063	0.0268766	yes	IPF vs CONTROL DOWN	unique	25.2271	25.422	41.7261	18.4015	29.0326	26.8697	46.735	30.7387	33.0743	34.6794	30.2077
ATP6V0A1	ATP6V0A1	ATP6V0A1	chr17:40610861-40674597	IPF	CTRL	OK	21.572	24.1438	-0.16249	-1.11922	0.648701	0.13055	0.273958	no	IPF vs CONTROL DOWN	unique	21.4879	22.3674	21.9099	26.6048	16.2795	20.7825	28.5502	27.1816	24.1045	23.0541	17.8284
ATP6V0A2	ATP6V0A2	ATP6V0A2	chr12:124196864-124246301	IPF	CTRL	OK	10.6844	6.22184	0.780092	1.71724	-1.17216	0.00575	0.0248734	yes	IPF vs CONTROL UP	unique	11.8833	10.4684	8.89603	12.7823	9.37542	10.7009	7.02402	6.35771	4.96985	5.32775	7.42986
ATP6V0A4	ATP6V0A4	ATP6V0A4	chr7:138391038-138490769	IPF	CTRL	NOTEST	0.188781	0.0939544	1.00668	2.00929	0	1	1	no	IPF vs CONTROL UP	unique	0.0954327	0.652194	0	0	0.163923	0.221139	0	0	0.183796	0.10073	0.185246
ATP6V0B	ATP6V0B	ATP6V0B	chr1:44440601-44443972	IPF	CTRL	OK	33.0613	35.5562	-0.104957	-1.07546	0.523874	0.2223	0.399955	no	IPF vs CONTROL DOWN	unique	43.1166	30.0394	34.4415	23.0489	40.7207	27.0009	52.4845	30.2691	21.9435	46.1143	26.9697
ATP6V0C	ATP6V0C	ATP6V0C	chr16:2563726-2570224	IPF	CTRL	OK	47.6417	76.5091	-0.683407	-1.60593	1.81048	5e-05	0.000459061	yes	IPF vs CONTROL DOWN	unique	49.7565	40.5892	48.0749	42.7044	50.2908	54.4343	73.3553	83.2586	79.4841	72.8368	73.6106
ATP6V0CP3	ATP6V0CP3	ATP6V0CP3	chr6:42695313-42695932	IPF	CTRL	NOTEST	0.359256	0.980736	-1.44885	-2.7299	0	1	1	no	IPF vs CONTROL DOWN	unique	0.551175	0.627648	0.338469	0	0	0.638247	0.42763	1.71599	1.58888	1.17118	0
ATP6V0D1	ATP6V0D1	ATP6V0D1	chr16:67471916-67515089	IPF	CTRL	OK	29.8055	37.4093	-0.32782	-1.25512	1.07902	0.0134	0.049271	yes	IPF vs CONTROL DOWN	unique	33.3069	23.2435	32.7754	21.9675	43.2724	24.2672	51.0278	34.9834	27.9188	38.3133	34.8033
ATP6V0D2	ATP6V0D2	ATP6V0D2	chr8:87111138-87166454	IPF	CTRL	NOTEST	0.614552	0.418706	0.553598	1.46774	0	1	1	no	IPF vs CONTROL UP	unique	1.11173	0.703228	0.0752912	0.689363	0.106121	1.00158	0.6666	0	1.42693	0	0
ATP6V0E1	ATP6V0E1	ATP6V0E1	chr5:172410762-172461900	IPF	CTRL	OK	57.0564	59.0049	-0.0484483	-1.03415	0.313348	0.4488	0.634934	no	IPF vs CONTROL DOWN	unique	59.4691	49.1355	79.456	33.7781	67.5848	52.9146	78.2721	59.8746	47.0767	60.1241	49.6772
ATP6V0E2	ATP6V0E2	ATP6V0E2	chr7:149564782-149577787	IPF	CTRL	OK	6.09589	6.89994	-0.178747	-1.1319	0.681335	0.11325	0.246959	no	IPF vs CONTROL DOWN	unique	7.20613	4.85741	5.4655	6.17006	6.96396	5.91228	6.40609	6.3685	4.49392	11.086	6.1452
ATP6V0E2-AS1	ATP6V0E2-AS1	ATP6V0E2-AS1	chr7:149564782-149577787	IPF	CTRL	NOTEST	1.66385	1.01918	0.70712	1.63254	0	1	1	no	IPF vs CONTROL UP	unique	2.02196	2.04029	1.60345	1.07262	2.24573	0.999048	0.731737	1.29101	1.08728	0.95737	1.02849
ATP6V1A	ATP6V1A	ATP6V1A	chr3:113465865-113530905	IPF	CTRL	OK	19.8581	19.5281	0.0241755	1.0169	0.437967	0.2977	0.488397	no	IPF vs CONTROL UP	unique	22.029	15.8708	18.9445	17.1189	24.137	21.0486	26.585	20.5723	17.796	16.9013	15.7861
ATP6V1B1	ATP6V1B1	ATP6V1B1	chr2:71162997-71192561	IPF	CTRL	NOTEST	0.98516	0.507195	0.957817	1.94237	0	1	1	no	IPF vs CONTROL UP	unique	1.67955	1.39079	0.651784	0.425867	0.524968	1.238	0.274773	0.634723	0.587854	0.322525	0.7161
ATP6V1B2	ATP6V1B2	ATP6V1B2	chr8:20054703-20079207	IPF	CTRL	OK	31.4552	42.6601	-0.439588	-1.35622	1.29393	0.00205	0.0108966	yes	IPF vs CONTROL DOWN	unique	29.9623	24.909	39.81	32.5267	31.4442	30.0792	49.8424	40.4392	47.7109	48.4313	26.8768
ATP6V1C1	ATP6V1C1	ATP6V1C1	chr8:104033247-104085285	IPF	CTRL	OK	11.8542	11.3168	0.0669282	1.04748	0.355263	0.40315	0.592829	no	IPF vs CONTROL UP	unique	11.6678	11.1273	13.4161	11.2124	10.9942	12.7072	12.7481	11.5083	10.5632	11.2528	10.5116
ATP6V1C2	ATP6V1C2	ATP6V1C2	chr2:10861774-10952960	IPF	CTRL	OK	4.36976	1.49551	1.54692	2.92192	-0.592021	0.22295	0.400269	no	IPF vs CONTROL UP	unique	4.03446	3.95959	3.66885	5.38617	3.52824	5.64124	1.22077	1.7386	1.64265	0.654427	2.2211
ATP6V1D	ATP6V1D	ATP6V1D	chr14:67804580-67826720	IPF	CTRL	OK	14.5684	11.6994	0.316406	1.24522	-0.0821424	0.8454	0.919466	no	IPF vs CONTROL UP	unique	10.375	12.5631	13.661	10.1034	24.4942	16.2138	16.6839	8.55704	10.9367	11.3946	10.9249
ATP6V1E1	ATP6V1E1	ATP6V1E1	chr22:18074902-18111588	IPF	CTRL	OK	22.84	32.4325	-0.505876	-1.41999	1.25836	0.00395	0.0185488	yes	IPF vs CONTROL DOWN	unique	27.14	16.3863	27.9094	21.0027	21.7647	22.8369	34.2121	33.9756	26.7835	34.2126	32.9785
ATP6V1E2	ATP6V1E2	ATP6V1E2	chr2:46738985-46747096	IPF	CTRL	NOTEST	0.855296	0.884707	-0.0487769	-1.03439	0	1	1	no	IPF vs CONTROL DOWN	unique	0.896476	0.510364	0.546663	1.45865	1.02736	0.692262	0.806606	0.931684	1.43815	0.946787	0.30031
ATP6V1F	ATP6V1F	ATP6V1F	chr7:128502856-128505903	IPF	CTRL	OK	27.6916	33.0439	-0.254937	-1.19328	0.776578	0.06835	0.17109	no	IPF vs CONTROL DOWN	unique	27.4374	30.731	30.6051	26.2267	31.8765	19.2728	40.4195	39.2242	26.8083	31.2538	27.5138
ATP6V1G1	ATP6V1G1	ATP6V1G1	chr9:117349993-117361152	IPF	CTRL	OK	24.1375	28.1156	-0.220092	-1.16481	0.824582	0.0497	0.133945	no	IPF vs CONTROL DOWN	unique	23.0793	17.1657	28.7329	21.7927	32.4964	21.5582	34.4687	23.7891	30.809	24.1911	27.32
ATP6V1G2	ATP6V1G2	ATP6V1G2	chr6_ssto_hap7:2827543-2845430	IPF	CTRL	NOTEST	0.198237	0.0861221	1.20277	2.30181	0	1	1	no	IPF vs CONTROL UP	multiple	0.089441	0.305506	0.199034	0.207719	0.0769497	0.310773	0.0766131	0.0619454	0.0860574	0.126052	0.0799427
ATP6V1G2-DDX39B	ATP6V1G2-DDX39B	ATP6V1G2-DDX39B	chr6_ssto_hap7:2827543-2845430	IPF	CTRL	NOTEST	0.0212832	0.000194647	6.77271	109.343	0	1	1	no	IPF vs CONTROL UP	multiple	3.46673e-05	2.5617e-07	0.12766	2.14396e-13	3.70447e-06	2.37453e-07	0.00096607	4.5424e-06	1.58311e-06	1.43204e-07	8.94891e-07
ATP6V1G3	ATP6V1G3	ATP6V1G3	chr1:198492351-198510075	IPF	CTRL	NOTEST	0	0	0	1	0	1	1	no	IPF vs. CONTROL EQUAL(0)	unique	0	0	0	0	0	0	0	0	0	0	0
ATP6V1H	ATP6V1H	ATP6V1H	chr8:54628102-54755871	IPF	CTRL	OK	9.90659	10.4467	-0.0765902	-1.05452	0.305391	0.47965	0.660265	no	IPF vs CONTROL DOWN	unique	10.6782	9.59534	12.2166	10.2087	9.73034	7.01038	16.7475	9.22728	9.7156	9.97544	6.56782
ATP7A	ATP7A	ATP7A	chrX:77166193-77305892	IPF	CTRL	OK	6.1497	5.58992	0.137688	1.10014	0.298394	0.4827	0.663078	no	IPF vs CONTROL UP	unique	5.99165	6.59444	5.83405	7.06839	5.51004	5.89961	7.03892	5.88347	5.38533	5.05363	4.58825
ATP7B	ATP7B	ATP7B	chr13:52506805-52585630	IPF	CTRL	OK	4.24815	3.19665	0.410274	1.32894	-0.256233	0.5523	0.720406	no	IPF vs CONTROL UP	unique	4.05969	4.35249	3.01787	3.22098	6.51885	4.31902	3.41718	4.02481	2.90859	3.01102	2.62165
ATP8A1	ATP8A1	ATP8A1	chr4:42410391-42659122	IPF	CTRL	OK	18.0448	16.8982	0.0947088	1.06785	0.0509101	0.90665	0.953279	no	IPF vs CONTROL UP	unique	15.0216	13.4633	22.07	33.7589	10.4959	13.459	22.2834	13.9026	12.6347	14.678	20.9925
ATP8A2	ATP8A2	ATP8A2	chr13:25946208-26595420	IPF	CTRL	NOTEST	0.262881	0.522319	-0.990523	-1.98691	0	1	1	no	IPF vs CONTROL DOWN	unique	0	0.389225	0.450939	0.079569	0.195553	0.461999	0.394924	0.651566	0.274313	0.871322	0.419472
ATP8B1	ATP8B1	ATP8B1	chr18:55297533-55470327	IPF	CTRL	OK	15.1065	9.81055	0.622766	1.53983	-0.893976	0.03775	0.109178	no	IPF vs CONTROL UP	unique	14.0601	13.7341	13.5125	12.8074	19.2929	17.2322	9.73638	7.31556	12.0642	8.02602	11.9106
ATP8B2	ATP8B2	ATP8B2	chr1:154298035-154323780	IPF	CTRL	OK	32.5437	23.2431	0.485576	1.40014	-0.681781	0.09555	0.219117	no	IPF vs CONTROL UP	unique	30.1014	37.163	33.029	36.9414	25.7303	32.2969	19.1662	22.147	28.8799	25.641	20.3813
ATP8B3	ATP8B3	ATP8B3	chr19:1782073-1812275	IPF	CTRL	NOTEST	0.314364	0.144497	1.1214	2.17558	0	1	1	no	IPF vs CONTROL UP	unique	0.326317	0.433455	0.165547	0.390717	0.240053	0.330098	0.237344	0.0592251	0.0548559	0.180331	0.190727
ATP8B4	ATP8B4	ATP8B4	chr15:50150434-50411419	IPF	CTRL	OK	4.57755	1.59752	1.51875	2.86542	-1.94117	5e-05	0.000459061	yes	IPF vs CONTROL UP	unique	4.11789	4.98159	2.89896	6.04306	4.76952	4.65428	1.8402	1.65892	1.58565	1.6285	1.27431
ATP8B5P	ATP8B5P	ATP8B5P	chr9:35406751-35483026	IPF	CTRL	OK	1.41856	2.43381	-0.778788	-1.71569	1.25998	0.00495	0.0221007	yes	IPF vs CONTROL DOWN	unique	1.69841	0.760571	1.58357	1.97744	1.48164	1.00974	4.02166	1.74676	2.44688	1.6757	2.27805
ATP9A	ATP9A	ATP9A	chr20:50213313-50384908	IPF	CTRL	OK	19.9826	17.2945	0.208432	1.15543	-0.0976632	0.81645	0.903396	no	IPF vs CONTROL UP	unique	18.6674	17.8108	18.2913	12.83	31.191	21.1053	16.5381	15.9148	17.1855	17.4976	19.3366
ATP9B	ATP9B	ATP9B	chr18:76829396-77138282	IPF	CTRL	OK	12.8599	9.35805	0.4586	1.37421	-0.410065	0.3317	0.524249	no	IPF vs CONTROL UP	unique	12.0868	15.1827	12.2395	16.4189	10.6546	10.5769	12.0085	10.7215	8.09606	7.82975	8.13443
ATPAF1	ATPAF1	ATPAF1	chr1:47100710-47134099	IPF	CTRL	OK	13.8631	11.6671	0.248812	1.18823	0.00348017	0.99365	0.997041	no	IPF vs CONTROL UP	unique	17.2297	11.1259	16.3091	13.3878	12.4672	12.6591	12.4244	12.2802	12.3418	8.92682	12.3621
ATPAF2	ATPAF2	ATPAF2	chr17:17921333-17942480	IPF	CTRL	OK	5.0465	4.18546	0.269896	1.20572	0.0817695	0.8451	0.919466	no	IPF vs CONTROL UP	unique	6.39393	5.0741	4.96615	5.40092	2.83337	5.61052	4.38609	4.42932	3.3563	5.11909	3.6365
ATPBD4	ATPBD4	ATPBD4	chr15:35663169-36151202	IPF	CTRL	OK	7.44578	4.06781	0.872169	1.83041	-0.714324	0.1011	0.22781	no	IPF vs CONTROL UP	unique	7.61069	7.94285	6.03338	6.45031	7.21911	9.41832	5.2408	4.77365	3.1646	2.73575	4.42426
ATPBD4-AS1	ATPBD4-AS1	ATPBD4-AS1	chr15:35663169-36151202	IPF	CTRL	NOTEST	1.00083	0.850393	0.235	1.17691	0	1	1	no	IPF vs CONTROL UP	unique	0.613233	1.62922	0.249535	0.854557	0.527607	2.13085	0.473322	1.06198	0.59012	0.756205	1.37034
ATPIF1	ATPIF1	ATPIF1	chr1:28562601-28564616	IPF	CTRL	OK	29.0187	29.6906	-0.0330224	-1.02315	0.321037	0.453	0.638702	no	IPF vs CONTROL DOWN	unique	20.8078	31.1507	31.8048	14.3766	53.0289	22.9434	38.077	24.3933	31.5124	25.6031	28.8671
ATR	ATR	ATR	chr3:142168076-142297668	IPF	CTRL	OK	13.6418	5.18644	1.39522	2.63028	-2.43442	5e-05	0.000459061	yes	IPF vs CONTROL UP	unique	11.9212	16.0692	9.27711	15.0268	15.866	13.6905	7.81546	5.59178	3.76074	4.82165	3.94258
ATRAID	ATRAID	ATRAID	chr2:27422454-27440046	IPF	CTRL	OK	24.912	31.6825	-0.346845	-1.27178	0.65274	0.1283	0.270285	no	IPF vs CONTROL DOWN	unique	26.6937	19.741	43.7148	12.2424	28.8453	18.2348	42.9633	26.3869	29.6306	35.7498	23.6819
ATRIP	ATRIP	ATRIP	chr3:48488113-48509044	IPF	CTRL	OK	4.71234	3.48215	0.436465	1.35328	-0.300317	0.49285	0.670816	no	IPF vs CONTROL UP	unique	4.5679	5.45098	3.49496	6.11102	4.44064	4.20855	3.47792	4.15461	2.67242	3.23632	3.86949
ATRN	ATRN	ATRN	chr20:3451664-3631769	IPF	CTRL	OK	11.9309	12.395	-0.0550538	-1.0389	0.223001	0.6047	0.762113	no	IPF vs CONTROL DOWN	unique	9.9804	11.69	10.1169	10.8748	14.7691	14.154	15.8383	12.6186	8.90476	12.93	11.6831
ATRNL1	ATRNL1	ATRNL1	chr10:116853123-117708496	IPF	CTRL	NOTEST	0.882974	0.40763	1.11511	2.16612	0	1	1	no	IPF vs CONTROL UP	unique	0.821055	0.936074	0.447726	1.14546	0.424219	1.52331	0.21133	0.365266	0.169165	0.520945	0.771442
ATRX	ATRX	ATRX	chrX:76760355-77041719	IPF	CTRL	OK	23.5787	17.5806	0.423503	1.34118	-0.497054	0.2493	0.431814	no	IPF vs CONTROL UP	unique	18.951	25.4013	23.0518	27.0897	22.3888	24.5899	16.9981	19.2957	17.9385	15.2767	18.394
ATXN1	ATXN1	ATXN1	chr6:16299342-16761721	IPF	CTRL	OK	20.0803	17.0279	0.237877	1.17926	-0.0882447	0.8338	0.913616	no	IPF vs CONTROL UP	unique	19.2434	21.2127	20.1149	20.4528	18.2145	21.2434	15.1689	17.628	17.0966	16.7791	18.467
ATXN10	ATXN10	ATXN10	chr22:46067677-46241187	IPF	CTRL	OK	22.2263	20.6753	0.10436	1.07502	0.0226089	0.95565	0.978198	no	IPF vs CONTROL UP	unique	23.8319	18.7474	23.385	20.3235	26.0897	20.9805	18.7185	23.242	18.1892	20.4826	22.7443
ATXN1L	ATXN1L	ATXN1L	chr16:71879893-71891236	IPF	CTRL	OK	16.0455	21.5529	-0.425707	-1.34323	1.41273	0.00105	0.00624762	yes	IPF vs CONTROL DOWN	unique	16.1751	15.1904	17.8763	15.7321	14.8888	16.4106	18.2154	24.2004	20.55	23.4637	21.3349
ATXN2	ATXN2	ATXN2	chr12:111890017-112037480	IPF	CTRL	OK	17.2259	14.8133	0.217689	1.16287	-0.182667	0.6648	0.80484	no	IPF vs CONTROL UP	unique	15.7344	16.6696	14.6473	20.8696	18.1936	17.2411	14.4893	15.0944	15.5015	11.822	17.1593
ATXN2L	ATXN2L	ATXN2L	chr16:28834368-28848558	IPF	CTRL	OK	37.7832	28.7922	0.392065	1.31227	-0.456611	0.28695	0.475685	no	IPF vs CONTROL UP	unique	35.1414	45.7403	29.8893	42.4389	35.5498	37.9395	26.8638	29.0517	30.7838	29.2452	28.0167
ATXN3	ATXN3	ATXN3	chr14:92524895-92572965	IPF	CTRL	OK	14.5836	11.9304	0.289703	1.22239	-0.0581989	0.89075	0.944691	no	IPF vs CONTROL UP	unique	14.6825	15.0037	13.7919	16.1528	10.7538	17.117	12.7125	14.6232	10.004	9.78345	12.529
ATXN3L	ATXN3L	ATXN3L	chrX:13328770-13338518	IPF	CTRL	NOTEST	0.0328592	0	Inf	0	0	1	1	no	IPF vs CONTROL UP (0)	unique	0	0	0	0	0	0.197155	0	0	0	0	0
ATXN7	ATXN7	ATXN7	chr3:63850232-63989136	IPF	CTRL	OK	25.0217	21.6034	0.211919	1.15823	0.0368295	0.9327	0.966075	no	IPF vs CONTROL UP	unique	24.4423	22.8828	19.1972	34.1155	21.3559	28.1364	24.4932	19.7862	25.9663	17.2306	20.5408
ATXN7L1	ATXN7L1	ATXN7L1	chr7:105245220-105517031	IPF	CTRL	OK	10.5696	6.29082	0.748601	1.68016	-0.839582	0.0486	0.131801	no	IPF vs CONTROL UP	unique	10.4167	10.0785	8.78199	13.4831	10.2091	10.4482	7.93302	5.83163	4.49121	4.84199	8.35624
ATXN7L2	ATXN7L2	ATXN7L2	chr1:110026560-110035420	IPF	CTRL	OK	3.57392	2.01782	0.824708	1.77118	-0.687447	0.1072	0.237527	no	IPF vs CONTROL UP	unique	3.93193	5.45616	1.72252	4.4572	2.74451	3.13119	1.54716	2.04337	2.36565	2.07548	2.05745
ATXN7L3	ATXN7L3	ATXN7L3	chr17:42269172-42275529	IPF	CTRL	OK	28.5182	22.6806	0.330426	1.25738	-0.299647	0.4886	0.667551	no	IPF vs CONTROL UP	unique	28.5997	28.4583	19.9617	37.131	26.6135	30.3449	17.9399	28.2313	19.1288	26.3282	21.7746
ATXN7L3B	ATXN7L3B	ATXN7L3B	chr12:74931550-74935232	IPF	CTRL	OK	42.5385	41.3277	0.0416615	1.0293	0.329982	0.43075	0.61829	no	IPF vs CONTROL UP	unique	36.4791	35.0417	40.6282	33.698	56.9937	52.3903	39.1363	43.9305	37.3793	43.6776	42.5146
ATXN8OS	ATXN8OS	ATXN8OS	chr13:70274724-70713885	IPF	CTRL	NOTEST	0	0	0	1	0	1	1	no	IPF vs. CONTROL EQUAL(0)	unique	0	0	0	0	0	0	0	0	0	0	0
AUH	AUH	AUH	chr9:93976096-94124206	IPF	CTRL	OK	4.39524	6.32071	-0.524145	-1.43808	0.709592	0.09485	0.217974	no	IPF vs CONTROL DOWN	unique	4.91467	4.51978	4.49849	5.79638	3.5769	3.06521	6.12636	8.44613	6.73079	5.99253	4.30774
AUNIP	AUNIP	AUNIP	chr1:26160496-26185848	IPF	CTRL	NOTEST	0.822568	0.523325	0.652427	1.57181	0	1	1	no	IPF vs CONTROL UP	unique	0.715613	0.977754	0.349061	1.19774	0.369	1.32624	0.441472	0.892481	0.137764	0.377851	0.767058
AUP1	AUP1	AUP1	chr2:74753774-74784678	IPF	CTRL	OK	39.2301	33.298	0.236528	1.17815	-0.109141	0.7939	0.889621	no	IPF vs CONTROL UP	unique	36.083	41.9166	42.349	34.619	41.8336	38.5796	37.1841	32.8612	29.2545	36.4422	30.7479
AURKA	AURKA	AURKA	chr20:54944444-54967351	IPF	CTRL	NOTEST	1.3474	0.576101	1.22578	2.33883	0	1	1	no	IPF vs CONTROL UP	unique	1.67177	0.951615	0.934306	1.55449	1.19716	1.77505	0.644862	0.579018	0.508321	0.588407	0.559895
AURKAIP1	AURKAIP1	AURKAIP1	chr1:1309109-1310818	IPF	CTRL	OK	16.1981	25.7626	-0.669453	-1.59047	1.36348	0.0023	0.0119529	yes	IPF vs CONTROL DOWN	unique	17.1801	16.6687	22.4358	11.9448	18.8162	10.1431	24.5607	25.1008	23.0272	33.4523	22.6721
AURKAPS1	AURKAPS1	AURKAPS1	chr1:220321609-220445843	IPF	CTRL	OK	3.65655	1.72594	1.0831	2.11858	-0.359868	0.51985	0.693851	no	IPF vs CONTROL UP	unique	3.72014	2.67525	2.38983	5.18477	2.52646	5.44283	2.77027	1.22071	1.13054	0.620781	2.88742
AURKB	AURKB	AURKB	chr17:8108048-8113944	IPF	CTRL	NOTEST	0.509497	0.227214	1.16502	2.24237	0	1	1	no	IPF vs CONTROL UP	unique	0.501902	0.571485	0.719088	1.04843	0.216077	0	0.0646054	0	0	0.398161	0.673302
AURKC	AURKC	AURKC	chr19:57742376-57746916	IPF	CTRL	NOTEST	1.09542	0.698531	0.649083	1.56817	0	1	1	no	IPF vs CONTROL UP	unique	0	1.6755	0.855145	1.94763	1.44667	0.647548	0.25253	0.580882	1.65216	0.444007	0.563074
AUTS2	AUTS2	AUTS2	chr7:69063904-70257885	IPF	CTRL	OK	15.6699	14.4594	0.115986	1.08372	0.0701097	0.8634	0.929497	no	IPF vs CONTROL UP	unique	18.1089	16.0272	12.4477	15.2574	15.735	16.4433	12.4321	15.4519	13.9755	10.2094	20.2283
AVEN	AVEN	AVEN	chr15:34158427-34357287	IPF	CTRL	OK	4.36635	4.10233	0.0899862	1.06436	0.0239159	0.9545	0.977603	no	IPF vs CONTROL UP	unique	4.12913	5.59702	6.83994	3.28841	3.38293	2.96068	3.03494	3.47332	2.64909	5.81855	5.53573
AVIL	AVIL	AVIL	chr12:58176527-58209852	IPF	CTRL	OK	4.67342	2.14027	1.12669	2.18357	-1.06754	0.0166	0.0583059	no	IPF vs CONTROL UP	unique	3.48314	5.68008	3.12224	6.94134	3.97087	4.84288	3.17933	1.22551	2.42227	2.00581	1.86842
AVL9	AVL9	AVL9	chr7:32535175-32758780	IPF	CTRL	OK	11.3278	9.77824	0.212219	1.15847	0.12498	0.76875	0.872859	no	IPF vs CONTROL UP	unique	9.95709	12.1873	9.78644	14.0654	11.0136	10.9569	13.3374	8.66734	7.42841	13.2057	6.25237
AVP	AVP	AVP	chr20:3063201-3065370	IPF	CTRL	NOTEST	0	0	0	1	0	1	1	no	IPF vs. CONTROL EQUAL(0)	unique	0	0	0	0	0	0	0	0	0	0	0
AVPI1	AVPI1	AVPI1	chr10:99437180-99447015	IPF	CTRL	OK	6.31674	15.7116	-1.31458	-2.4873	2.28818	5e-05	0.000459061	yes	IPF vs CONTROL DOWN	unique	10.4639	4.96436	7.18698	4.85962	5.62817	4.79742	19.4101	11.0987	18.25	13.1366	16.6627
AVPR1A	AVPR1A	AVPR1A	chr12:63536538-63546590	IPF	CTRL	OK	2.46719	0.541204	2.18863	4.55871	-2.59037	5e-05	0.000459061	yes	IPF vs CONTROL UP	unique	1.66155	2.96103	1.45086	0.857806	5.23586	2.63604	0.621088	0.375544	0.278271	0.60934	0.821776
AVPR1B	AVPR1B	AVPR1B	chr1:206224282-206231482	IPF	CTRL	NOTEST	0.196143	0.0397856	2.30159	4.93001	0	1	1	no	IPF vs CONTROL UP	unique	0.167957	0.191237	0.204903	0.468355	0.144408	0	0.0863778	0	0	0	0.11255
AVPR2	AVPR2	AVPR2	chrX:153167984-153172620	IPF	CTRL	OK	3.54906	2.37066	0.582148	1.49708	-0.312248	0.4686	0.650433	no	IPF vs CONTROL UP	unique	2.75708	4.61009	2.25026	4.39844	3.59102	3.68748	1.88434	3.08604	1.49265	2.8457	2.54458
AWAT1	AWAT1	AWAT1	chrX:69454504-69460511	IPF	CTRL	NOTEST	0.404673	0.405633	-0.00341914	-1.00237	0	1	1	no	IPF vs CONTROL DOWN	unique	0.433623	0.246867	0.132365	0.302078	0.559741	0.753364	0.223168	0.450543	0.834515	0.229207	0.290733
AWAT2	AWAT2	AWAT2	chrX:69260391-69269788	IPF	CTRL	NOTEST	0.118791	0.100782	0.237188	1.17869	0	1	1	no	IPF vs CONTROL UP	unique	0	0.315706	0.0845246	0.193382	0.119136	0	0.142537	0.288177	0	0.0731977	0
AXDND1	AXDND1	AXDND1	chr1:179334854-179545084	IPF	CTRL	NOTEST	0.314909	0.0985116	1.67657	3.19667	0	1	1	no	IPF vs CONTROL UP	unique	0.256398	0.26984	0.156169	0.22058	0.29348	0.692988	0.15365	0	0.0822765	0.0450834	0.211548
AXIN1	AXIN1	AXIN1	chr16:337439-402676	IPF	CTRL	OK	10.6491	11.5846	-0.121476	-1.08785	0.749086	0.07865	0.1903	no	IPF vs CONTROL DOWN	unique	10.7866	9.97189	9.23218	13.4653	10.2969	10.1417	9.64434	11.8487	12.5192	12.0211	11.8896
AXIN2	AXIN2	AXIN2	chr17:63524682-63557740	IPF	CTRL	OK	22.0116	20.0874	0.131975	1.09579	-0.0226644	0.95795	0.979135	no	IPF vs CONTROL UP	unique	24.5689	18.726	23.5743	31.4708	12.9533	20.7765	13.2596	25.8931	18.5081	17.813	24.9632
AXL	AXL	AXL	chr19:41725107-41767671	IPF	CTRL	OK	20.3281	31.1992	-0.618035	-1.53478	1.64882	0.00015	0.00122565	yes	IPF vs CONTROL DOWN	unique	21.2862	19.1539	24.9731	17.1069	17.1919	22.2563	41.6924	26.4711	31.5534	33.4386	22.8403
AZGP1	AZGP1	AZGP1	chr7:99564349-99573735	IPF	CTRL	OK	1.03484	4.65477	-2.16929	-4.49803	1.81895	0.0002	0.00156984	yes	IPF vs CONTROL DOWN	unique	1.45221	1.65354	0.739147	0	2.08384	0.280332	3.73838	2.76603	8.15067	1.15186	7.46689
AZGP1P1	AZGP1P1	AZGP1P1	chr7:99578384-99581860	IPF	CTRL	NOTEST	0	0	0	1	0	1	1	no	IPF vs. CONTROL EQUAL(0)	unique	0	0	0	0	0	0	0	0	0	0	0
AZI1	AZI1	AZI1	chr17:79163392-79196751	IPF	CTRL	OK	3.51056	3.46608	0.0183962	1.01283	0.145305	0.73195	0.848898	no	IPF vs CONTROL UP	unique	3.19973	3.73655	2.61558	4.12329	4.71702	2.67119	2.48754	4.05064	2.60676	3.90112	4.28434
AZI2	AZI2	AZI2	chr3:28363843-28390618	IPF	CTRL	OK	17.0244	14.2727	0.254347	1.1928	-0.0499019	0.9065	0.953253	no	IPF vs CONTROL UP	unique	15.8673	17.6027	18.9432	19.6552	14.6322	15.4456	18.069	11.4383	16.6123	12.4802	12.7635
AZIN1	AZIN1	AZIN1	chr8:103838535-103876397	IPF	CTRL	OK	43.2446	33.5742	0.365168	1.28803	-0.415074	0.3313	0.523835	no	IPF vs CONTROL UP	unique	29.3321	33.9365	43.8444	22.1273	84.75	45.4773	34.9199	36.9797	34.5081	31.5245	29.9387
AZU1	AZU1	AZU1	chr19:827830-832017	IPF	CTRL	NOTEST	0.281595	0.476383	-0.758498	-1.69173	0	1	1	no	IPF vs CONTROL DOWN	unique	0	0	0	0.485312	1.20426	0	1.07982	0.362444	0.335639	0.369676	0.234335
B2M	B2M	B2M	chr15:45003684-45010357	IPF	CTRL	OK	1191.67	1800.61	-0.595498	-1.51099	1.04528	0.01915	0.0653386	no	IPF vs CONTROL DOWN	unique	1282.87	879.502	1486.27	1037.72	1532.15	931.517	2737.32	1755.93	1378.76	1995.18	1135.85
B3GALNT1	B3GALNT1	B3GALNT1	chr3:160801670-160823160	IPF	CTRL	OK	4.87969	13.3285	-1.44965	-2.73142	3.06229	5e-05	0.000459061	yes	IPF vs CONTROL DOWN	unique	5.46807	4.69433	4.45546	6.13613	3.53996	4.98421	11.4649	17.3327	15.5097	11.4113	10.9238
B3GALNT2	B3GALNT2	B3GALNT2	chr1:235530727-235667781	IPF	CTRL	OK	13.7714	7.34386	0.907066	1.87523	-1.29776	0.00325	0.0158974	yes	IPF vs CONTROL UP	unique	13.9312	14.2953	11.3578	13.819	11.086	18.1392	7.23345	5.91155	8.47597	6.14605	8.95229
B3GALT1	B3GALT1	B3GALT1	chr2:168675181-168727366	IPF	CTRL	NOTEST	0.336699	0.0534236	2.65591	6.30243	0	1	1	no	IPF vs CONTROL UP	unique	0.542678	0.308945	0.661683	0	0.349737	0.157148	0.104609	0	0	0.0716271	0.0908819
B3GALT2	B3GALT2	B3GALT2	chr1:193091087-193223942	IPF	CTRL	OK	6.78064	4.69582	0.530045	1.44397	-0.238461	0.58335	0.745564	no	IPF vs CONTROL UP	unique	8.19728	5.7293	7.4149	7.02488	3.76224	8.55527	5.18994	4.04973	5.93886	3.68207	4.61851
B3GALT4	B3GALT4	B3GALT4	chr6_qbl_hap6:4477155-4478841	IPF	CTRL	OK	2.15294	2.55756	-0.248456	-1.18794	0.70549	0.0971	0.221465	no	IPF vs CONTROL DOWN	multiple	1.70158	2.6236	2.0546	2.0262	2.49972	2.01196	1.99659	3.24174	1.60351	3.07126	2.87468
B3GALT5	B3GALT5	B3GALT5	chr21:41029253-41034815	IPF	CTRL	NOTEST	1.32976	0.345084	1.94614	3.85343	0	1	1	no	IPF vs CONTROL UP	unique	1.32967	0.883122	0.54018	1.3916	2.09379	1.74018	0.398565	0	0	0.584786	0.742067
B3GALT6	B3GALT6	B3GALT6	chr1:1167628-1170420	IPF	CTRL	OK	8.73362	8.35047	0.0647222	1.04588	0.38634	0.36995	0.562349	no	IPF vs CONTROL UP	unique	10.1985	9.59755	7.79927	6.53546	7.06031	11.2106	5.77466	8.00466	8.71623	9.50054	9.75624
B3GALTL	B3GALTL	B3GALTL	chr13:31774111-31906411	IPF	CTRL	OK	3.7111	2.5494	0.541691	1.45568	-0.184995	0.66415	0.804507	no	IPF vs CONTROL UP	unique	3.39983	3.40643	3.35381	4.65227	3.90986	3.54443	2.89817	2.54476	2.02962	2.72559	2.54886
B3GAT1	B3GAT1	B3GAT1	chr11:134248397-134281812	IPF	CTRL	NOTEST	1.33694	0.780917	0.775691	1.71201	0	1	1	no	IPF vs CONTROL UP	unique	1.14423	0.93056	1.0064	2.73839	0.561279	1.64076	0.766406	0.509756	0.865598	0.996783	0.76604
B3GAT2	B3GAT2	B3GAT2	chr6:71377478-71666788	IPF	CTRL	NOTEST	2.43017e-197	0.0167927	-647.243	-6.9101e+194	0	1	1	no	IPF vs CONTROL DOWN	unique	2.09391e-294	0	4.49948e-292	6.99253998843144e-316	2.1464e-287	1.4581e-196	0	0	0	0.0839635	0
B3GAT3	B3GAT3	B3GAT3	chr11:62382767-62389647	IPF	CTRL	OK	11.545	9.9369	0.216396	1.16183	0.211787	0.61355	0.76949	no	IPF vs CONTROL UP	unique	16.4221	10.388	7.68188	11.1917	13.6527	9.9334	9.76156	8.34293	10.0096	11.6646	9.90582
B3GNT1	B3GNT1	B3GNT1	chr11:66112842-66115161	IPF	CTRL	OK	6.06823	13.415	-1.1445	-2.2107	2.11049	5e-05	0.000459061	yes	IPF vs CONTROL DOWN	unique	6.12596	3.4064	10.2498	4.57028	6.61137	5.44559	10.9859	13.1776	11.6561	17.2258	14.0298
B3GNT2	B3GNT2	B3GNT2	chr2:62423261-62451866	IPF	CTRL	OK	14.6902	22.884	-0.639484	-1.55777	1.74042	5e-05	0.000459061	yes	IPF vs CONTROL DOWN	unique	15.4416	13.4872	13.0824	15.793	14.5331	15.8039	22.2534	21.3274	19.4477	29.8604	21.531
B3GNT3	B3GNT3	B3GNT3	chr19:17905918-17924385	IPF	CTRL	OK	3.36797	0.671156	2.32716	5.01817	-2.18847	5e-05	0.000459061	yes	IPF vs CONTROL UP	unique	4.49151	4.01811	1.62908	0.746188	5.23513	4.08783	0.989069	0.222315	0.720668	0.564356	0.859374
B3GNT4	B3GNT4	B3GNT4	chr12:122688227-122692084	IPF	CTRL	NOTEST	1.84614	1.56904	0.234636	1.17661	0	1	1	no	IPF vs CONTROL UP	unique	1.20266	1.59759	1.22337	3.35206	1.37954	2.32165	1.90799	1.24966	1.54313	1.80074	1.34367
B3GNT5	B3GNT5	B3GNT5	chr3:182895830-183145855	IPF	CTRL	OK	16.1931	15.865	0.0295303	1.02068	0.421723	0.33055	0.523086	no	IPF vs CONTROL UP	unique	10.637	13.5358	12.362	10.2898	31.0868	19.2474	32.0963	7.08284	15.4633	12.2107	12.4721
B3GNT6	B3GNT6	B3GNT6	chr11:76745434-76753005	IPF	CTRL	NOTEST	1.26568	0.16495	2.93981	7.67309	0	1	1	no	IPF vs CONTROL UP	unique	0.350688	5.05766	0.142484	0	1.90784	0.135404	0.120145	0	0	0	0.704607
B3GNT7	B3GNT7	B3GNT7	chr2:232260334-232265875	IPF	CTRL	OK	10.592	22.0907	-1.06047	-2.08561	2.63677	5e-05	0.000459061	yes	IPF vs CONTROL DOWN	unique	8.33507	10.5747	10.5881	6.76021	18.4663	8.82745	25.5431	22.693	20.0247	18.9693	23.2235
B3GNT8	B3GNT8	B3GNT8	chr19:41931263-41934635	IPF	CTRL	OK	5.0156	10.0512	-1.00288	-2.00399	2.13642	5e-05	0.000459061	yes	IPF vs CONTROL DOWN	unique	5.85794	4.50666	6.85567	5.51939	2.58592	4.768	6.59433	10.6948	10.0574	13.0439	9.86572
B3GNT9	B3GNT9	B3GNT9	chr16:67143914-67184902	IPF	CTRL	OK	11.8251	11.7382	0.0106391	1.0074	0.315732	0.4562	0.641076	no	IPF vs CONTROL UP	unique	12.1857	14.8217	12.0747	6.91879	14.2403	10.7095	8.59196	12.5966	10.1715	12.3833	14.9478
B3GNTL1	B3GNTL1	B3GNTL1	chr17:80901666-81009686	IPF	CTRL	OK	4.13524	2.13618	0.952942	1.93582	-1.32613	0.0024	0.0123876	yes	IPF vs CONTROL UP	unique	3.73224	4.24962	2.68078	3.67046	7.93551	2.54285	2.42939	1.82486	2.11255	0.92842	3.38566
B4GALNT1	B4GALNT1	B4GALNT1	chr12:58013692-58027022	IPF	CTRL	NOTEST	1.14039	0.369003	1.62782	3.09046	0	1	1	no	IPF vs CONTROL UP	unique	1.46055	1.10337	0.906221	1.41318	0.891601	1.06743	0.416946	0.153386	0.375584	0.591442	0.307659
B4GALNT2	B4GALNT2	B4GALNT2	chr17:47209821-47247351	IPF	CTRL	NOTEST	0.424322	0.0614789	2.787	6.90191	0	1	1	no	IPF vs CONTROL UP	unique	0.164424	0.187185	0.200752	0	0.849321	1.14425	0	0	0	0.0868495	0.220545
B4GALNT3	B4GALNT3	B4GALNT3	chr12:569542-671058	IPF	CTRL	OK	7.35249	4.96072	0.567683	1.48214	-0.666788	0.11945	0.256929	no	IPF vs CONTROL UP	unique	8.04926	7.25538	4.03457	6.67177	12.9564	5.14758	5.62026	2.26616	2.74473	7.82924	6.34323
B4GALNT4	B4GALNT4	B4GALNT4	chr11:369794-382117	IPF	CTRL	NOTEST	0.273111	0.199583	0.452496	1.36841	0	1	1	no	IPF vs CONTROL UP	unique	0.16689	0.190017	0.355779	0.349466	0.286538	0.289977	0.0857213	0	0.321363	0.0880418	0.502791
B4GALT1	B4GALT1	B4GALT1	chr9:33110638-33167356	IPF	CTRL	OK	49.2827	57.1284	-0.213126	-1.1592	0.967555	0.02495	0.0803161	no	IPF vs CONTROL DOWN	unique	58.3362	46.6105	53.5126	38.6794	48.1333	50.4244	59.301	50.0764	71.7397	55.3825	49.1425
B4GALT2	B4GALT2	B4GALT2	chr1:44444873-44456843	IPF	CTRL	OK	11.2164	8.44707	0.409087	1.32785	-0.290991	0.4925	0.670733	no	IPF vs CONTROL UP	unique	17.5473	13.9277	9.26324	6.57843	11.2743	8.7074	5.83517	8.11902	6.67084	10.3533	11.257
B4GALT3	B4GALT3	B4GALT3	chr1:161141099-161147758	IPF	CTRL	OK	13.3791	10.8111	0.307468	1.23753	-0.162201	0.69945	0.827928	no	IPF vs CONTROL UP	unique	14.1781	15.2878	10.5045	14.365	12.4555	13.4839	9.76452	9.90903	11.6687	14.1292	8.58417
B4GALT4	B4GALT4	B4GALT4	chr3:118930588-118959752	IPF	CTRL	OK	7.86695	5.77617	0.445691	1.36197	-0.524988	0.22125	0.398677	no	IPF vs CONTROL UP	unique	7.78767	9.16255	6.40877	7.42384	10.7058	5.71304	6.73484	4.04706	5.9972	6.45234	5.6494
B4GALT5	B4GALT5	B4GALT5	chr20:48249482-48330421	IPF	CTRL	OK	20.4703	19.6123	0.0617741	1.04375	0.3296	0.4313	0.618552	no	IPF vs CONTROL UP	unique	21.4496	21.2573	19.1295	13.9221	24.3166	22.747	15.8689	15.892	29.0315	18.5449	18.7244
B4GALT6	B4GALT6	B4GALT6	chr18:29202208-29264686	IPF	CTRL	NOTEST	1.51493	1.29767	0.223329	1.16742	0	1	1	no	IPF vs CONTROL UP	unique	1.36397	2.22818	1.69698	1.15943	1.67928	0.961736	1.26366	1.35635	0.97075	1.03204	1.86554
B4GALT7	B4GALT7	B4GALT7	chr5:177027118-177037346	IPF	CTRL	OK	14.2734	10.6948	0.416424	1.33462	-0.316213	0.45175	0.637381	no	IPF vs CONTROL UP	unique	16.4107	12.588	11.4865	15.8951	14.8538	14.4063	11.1946	11.1298	9.80909	9.76385	11.5765
B9D1	B9D1	B9D1	chr17:19240866-19290532	IPF	CTRL	OK	14.6013	7.80587	0.903463	1.87055	-0.176144	0.43445	0.621657	no	IPF vs CONTROL UP	unique	15.0885	14.2348	10.3022	7.37548	28.7571	11.8496	8.47432	7.14982	4.09032	6.6301	12.6848
B9D2	B9D2	B9D2	chr19:41860321-41889987	IPF	CTRL	OK	7.77465	5.508	0.49725	1.41152	-0.210983	0.6229	0.776011	no	IPF vs CONTROL UP	unique	8.80864	5.53379	5.57162	5.49465	17.0177	4.2215	4.61759	6.62551	3.21393	5.94825	7.13471
BAALC	BAALC	BAALC	chr8:104145190-104242533	IPF	CTRL	OK	3.08665	4.94387	-0.6796	-1.6017	1.39817	0.00225	0.0117535	yes	IPF vs CONTROL DOWN	unique	3.14926	3.08904	1.91774	2.87737	4.84668	2.63981	3.35079	6.14334	2.61185	6.13117	6.48222
BAAT	BAAT	BAAT	chr9:104122698-104147287	IPF	CTRL	NOTEST	0.879266	0.0652518	3.75221	13.475	0	1	1	no	IPF vs CONTROL UP	unique	1.79366	0.0972194	0.85788	0.925271	0.513267	1.0883	0.109676	0	0	0.0450461	0.171537
BABAM1	BABAM1	BABAM1	chr19:17378231-17390162	IPF	CTRL	OK	17.5419	20.19	-0.20283	-1.15095	0.639852	0.13485	0.28011	no	IPF vs CONTROL DOWN	unique	16.5146	18.5597	21.3668	17.0335	15.8723	15.9047	21.6893	24.7303	12.6373	21.7613	20.1316
BACE1	BACE1	BACE1	chr11:117103403-117186972	IPF	CTRL	OK	20.5662	17.3567	0.24478	1.18491	-0.0375295	0.92875	0.964329	no	IPF vs CONTROL UP	unique	20.7919	20.0162	21.4539	19.074	17.1406	24.9205	16.2627	17.5061	16.0097	21.1601	15.845
BACE1-AS	BACE1-AS	BACE1-AS	chr11:117103403-117186972	IPF	CTRL	OK	7.23233	6.44694	0.165845	1.12182	-0.0203216	0.9732	0.987475	no	IPF vs CONTROL UP	unique	9.79898	6.62244	9.58062	7.37456	5.28899	4.72838	5.47902	8.61655	3.53307	5.45402	9.15205
BACE2	BACE2	BACE2	chr21:42539727-42648524	IPF	CTRL	OK	22.8075	10.2908	1.14815	2.21629	-0.939548	0.02845	0.0884261	no	IPF vs CONTROL UP	unique	17.8119	24.6888	26.421	9.45772	27.181	31.2847	13.1292	10.0624	8.06077	11.6458	8.55607
BACH1	BACH1	BACH1	chr21:30671219-30734217	IPF	CTRL	OK	30.7646	29.58	0.0566494	1.04005	0.308697	0.46745	0.649769	no	IPF vs CONTROL UP	unique	26.5883	34.301	29.2243	37.3618	28.5774	28.5347	36.2624	23.7081	38.9395	27.8151	21.1748
BACH2	BACH2	BACH2	chr6:90636246-91006627	IPF	CTRL	OK	3.06007	3.4838	-0.187096	-1.13847	0.817737	0.0573	0.14925	no	IPF vs CONTROL DOWN	unique	1.85934	3.88108	3.61449	3.24703	2.57799	3.18052	2.85204	3.54415	3.87958	3.54023	3.60301
BAD	BAD	BAD	chr11:64037299-64056972	IPF	CTRL	OK	18.5502	25.9528	-0.484458	-1.39906	0.872754	0.05075	0.135832	no	IPF vs CONTROL DOWN	unique	22.5878	14.0786	24.633	10.8435	24.7355	14.4228	20.407	27.8699	22.4157	31.6667	27.4049
BAG1	BAG1	BAG1	chr9:33252469-33264759	IPF	CTRL	OK	8.20436	12.4402	-0.60055	-1.51629	1.38771	0.00095	0.00574742	yes	IPF vs CONTROL DOWN	unique	10.0865	5.74209	9.30423	6.31646	9.35764	8.41923	12.1123	10.7938	13.4963	14.8265	10.9722
BAG2	BAG2	BAG2	chr6:57037103-57050012	IPF	CTRL	OK	10.3658	7.0424	0.557698	1.47192	-0.662643	0.10955	0.241463	no	IPF vs CONTROL UP	unique	11.2154	7.69463	16.2192	10.228	6.17862	10.6592	8.39004	5.08086	7.47376	5.69414	8.5732
BAG3	BAG3	BAG3	chr10:121410881-121437329	IPF	CTRL	OK	12.906	22.7965	-0.820773	-1.76635	1.72183	0.0001	0.000852984	yes	IPF vs CONTROL DOWN	unique	16.0058	11.2446	15.4959	8.55352	17.0631	9.07279	24.5289	13.5688	39.9964	21.7479	14.1403
BAG4	BAG4	BAG4	chr8:38020838-38070819	IPF	CTRL	OK	9.69362	8.64011	0.165986	1.12193	0.16644	0.6991	0.827654	no	IPF vs CONTROL UP	unique	10.0204	7.80591	10.5429	9.26645	9.41148	11.1146	10.5702	9.07069	8.45229	6.44404	8.66335
BAG5	BAG5	BAG5	chr14:104022880-104029151	IPF	CTRL	OK	14.306	15.7812	-0.14159	-1.10312	0.795429	0.06395	0.162356	no	IPF vs CONTROL DOWN	unique	15.3281	13.9756	14.2369	12.9084	13.9734	15.4135	15.0847	17.6618	16.7338	15.7099	13.7159
BAG6	BAG6	BAG6	chr6_ssto_hap7:2937601-2956785	IPF	CTRL	OK	5.96381	6.94977	-0.220729	-1.16532	0.770424	0.07625	0.185978	no	IPF vs CONTROL DOWN	multiple	6.37154	6.00731	4.61793	5.36396	8.15487	5.26727	7.2513	6.55836	6.3952	7.45601	7.08796
BAGE	BAGE,BAGE5	BAGE,BAGE5	chr21:11020841-11098937	IPF	CTRL	NOTEST	0.0642295	0	Inf	0	0	1	1	no	IPF vs CONTROL UP (0)	unique	0	0	0	0	0	0.385377	0	0	0	0	0
BAGE3	BAGE3	BAGE3	chr21:11020841-11098937	IPF	CTRL	NOTEST	0	4.76182e-05	#NAME?	0	0	1	1	no	IPF vs CONTROL DOWN (0)	unique	0	0	0	0	0	0	0	0.000238091	0	0	0
BAGE4	BAGE4	BAGE4	chr21:11020841-11098937	IPF	CTRL	NOTEST	0	0.0172141	#NAME?	0	0	1	1	no	IPF vs CONTROL DOWN (0)	unique	0	0	0	0	0	0	0	0.0860706	0	0	0
BAGE5	BAGE5	BAGE5	chr21:11020841-11098937	IPF	CTRL	NOTEST	0	0.0180146	#NAME?	0	0	1	1	no	IPF vs CONTROL DOWN (0)	unique	0	0	0	0	0	0	0	0.0900731	0	0	0
BAHCC1	BAHCC1	BAHCC1	chr17:79373539-79433358	IPF	CTRL	OK	9.24943	10.5103	-0.184361	-1.13631	0.849424	0.04145	0.117041	no	IPF vs CONTROL DOWN	unique	9.25193	9.80845	7.1974	9.86881	9.45472	9.91527	7.59859	11.6932	8.80317	12.7614	11.6949
BAHD1	BAHD1	BAHD1	chr15:40733410-40760441	IPF	CTRL	OK	12.2516	13.5862	-0.14917	-1.10893	0.77287	0.0625	0.159611	no	IPF vs CONTROL DOWN	unique	12.3188	14.7451	11.3087	12.1738	11.5472	11.4159	12.7484	15.5649	14.4164	13.8265	11.3746
BAI1	BAI1	BAI1	chr8:143545376-143626368	IPF	CTRL	NOTEST	0.623138	0.652677	-0.0668184	-1.0474	0	1	1	no	IPF vs CONTROL DOWN	unique	0.3089	0.351702	0.50145	1.50999	0.530049	0.536737	0.660783	0.481716	0.545324	1.05873	0.516834
BAI2	BAI2	BAI2	chr1:32192717-32229648	IPF	CTRL	OK	1.51656	0.479398	1.66151	3.16347	-1.87922	5e-05	0.000459061	yes	IPF vs CONTROL UP	unique	1.05161	1.61639	0.896258	1.0281	2.43611	2.07089	0.283449	0.163994	0.75947	0.415889	0.774188
BAI3	BAI3	BAI3	chr6:69345631-70099403	IPF	CTRL	OK	2.10495	3.00507	-0.513615	-1.42762	1.22256	0.0054	0.023684	yes	IPF vs CONTROL DOWN	unique	1.91776	3.10286	1.47464	2.32605	1.64534	2.16305	2.3448	1.94132	3.30459	4.12468	3.30998
BAIAP2	BAIAP2	BAIAP2	chr17:79008946-79156964	IPF	CTRL	OK	23.6439	33.4346	-0.499876	-1.41409	0.930584	0.0308	0.0938434	no	IPF vs CONTROL DOWN	unique	29.0179	19.4677	18.9944	26.8635	24.0821	23.4377	31.9135	28.3761	29.55	29.3088	48.0247
BAIAP2-AS1	BAIAP2-AS1	BAIAP2-AS1	chr17:79002932-79008519	IPF	CTRL	OK	6.69694	11.9804	-0.839099	-1.78893	1.95716	5e-05	0.000459061	yes	IPF vs CONTROL DOWN	unique	6.53605	3.97875	9.02341	6.5966	8.27473	5.77209	8.75614	14.1278	10.4683	13.2082	13.3414
BAIAP2L1	BAIAP2L1	BAIAP2L1	chr7:97910978-98030427	IPF	CTRL	OK	21.7807	13.6298	0.676285	1.59802	-0.628687	0.1444	0.294377	no	IPF vs CONTROL UP	unique	18.0267	22.755	9.69016	19.2584	36.5319	24.4223	14.7131	13.6065	14.7908	10.2947	14.7441
BAIAP2L2	BAIAP2L2	BAIAP2L2	chr22:38480895-38506676	IPF	CTRL	NOTEST	0.781534	0.709543	0.139419	1.10146	0	1	1	no	IPF vs CONTROL UP	unique	0.411616	0.937328	0.501893	1.5311	0.353706	0.953562	0.317387	0.570401	0.924501	0.724396	1.01103
BAIAP3	BAIAP3	BAIAP3	chr16:1383605-1401873	IPF	CTRL	OK	14.0962	3.8956	1.85539	3.61849	-2.30704	5e-05	0.000459061	yes	IPF vs CONTROL UP	unique	5.73844	16.4336	4.13751	7.31506	43.5155	7.43721	4.85484	2.56177	1.80634	3.76181	6.49326
BAK1	BAK1	BAK1	chr6:33540322-33548070	IPF	CTRL	OK	5.20852	5.12446	0.0234756	1.01641	0.103218	0.8029	0.895138	no	IPF vs CONTROL UP	unique	5.36155	4.8837	4.90283	6.35729	3.22488	6.52089	3.96172	6.5476	5.16101	5.73192	4.22003
BAMBI	BAMBI	BAMBI	chr10:28966423-28971868	IPF	CTRL	OK	4.18066	6.05749	-0.534988	-1.44893	1.00506	0.02125	0.0707197	no	IPF vs CONTROL DOWN	unique	3.28826	2.75876	6.33466	2.8954	6.39906	3.40782	6.27536	7.5536	4.66383	7.03944	4.7552
BANCR	BANCR	BANCR	chr9:71911596-71921972	IPF	CTRL	NOTEST	0.0715402	0.277179	-1.95399	-3.87446	0	1	1	no	IPF vs CONTROL DOWN	unique	0	0	0	0	0.429241	0	0.384686	0	0	0	1.00121
BANF1	BANF1	BANF1	chr11:65764015-65771617	IPF	CTRL	OK	18.7288	14.7709	0.342504	1.26796	-0.21031	0.6295	0.78032	no	IPF vs CONTROL UP	unique	22.6442	15.5191	18.6161	13.4377	22.7528	19.403	14.3356	17.9926	12.565	15.6249	13.3363
BANF2	BANF2	BANF2	chr20:17674319-17716517	IPF	CTRL	NOTEST	0.206883	0	Inf	0	0	1	1	no	IPF vs CONTROL UP (0)	unique	0	1.2413	0	0	0	0	0	0	0	0	0
BANK1	BANK1	BANK1	chr4:102711763-102995969	IPF	CTRL	OK	5.64585	2.81404	1.00455	2.00632	-1.24772	0.0041	0.0190993	yes	IPF vs CONTROL UP	unique	4.01644	11.2413	2.8472	7.5375	4.40106	3.83162	4.62005	2.52237	2.10589	1.76561	3.05628
BANP	BANP	BANP	chr16:87985037-88110924	IPF	CTRL	OK	6.27595	5.22873	0.263373	1.20028	-0.151642	0.71905	0.840429	no	IPF vs CONTROL UP	unique	4.91891	8.77959	5.88174	4.63997	6.96826	6.46722	5.34987	5.62857	4.72751	4.84285	5.59485
BAP1	BAP1	BAP1	chr3:52435024-52444009	IPF	CTRL	OK	24.118	24.4611	-0.0203776	-1.01422	0.509049	0.23205	0.411824	no	IPF vs CONTROL DOWN	unique	24.4974	25.2401	22.405	22.4261	27.7169	22.4224	24.0713	25.1318	21.8078	26.9898	24.3046
BARD1	BARD1	BARD1	chr2:215593274-215674428	IPF	CTRL	OK	4.55747	3.51121	0.376265	1.29798	-0.56538	0.17865	0.34476	no	IPF vs CONTROL UP	unique	5.2815	3.32659	6.0262	4.39054	3.76423	4.55577	4.76386	3.15363	3.02901	2.84673	3.76282
BARHL1	BARHL1	BARHL1	chr9:135457992-135465640	IPF	CTRL	NOTEST	0.347859	0.57141	-0.716025	-1.64265	0	1	1	no	IPF vs CONTROL DOWN	unique	0.31082	0	0.37911	1.08362	0.13359	0.180011	0.199776	1.29208	0.598334	0.246219	0.52064
BARHL2	BARHL2	BARHL2	chr1:91177578-91182794	IPF	CTRL	NOTEST	0	0.0388012	#NAME?	0	0	1	1	no	IPF vs CONTROL DOWN (0)	unique	0	0	0	0	0	0	0	0	0.194006	0	0
BARX1	BARX1	BARX1	chr9:96713908-96717608	IPF	CTRL	NOTEST	0	0	0	1	0	1	1	no	IPF vs. CONTROL EQUAL(0)	unique	0	0	0	0	0	0	0	0	0	0	0
BARX2	BARX2	BARX2	chr11:129245880-129322174	IPF	CTRL	NOTEST	0.967503	0.230045	2.07235	4.2057	0	1	1	no	IPF vs CONTROL UP	unique	0.674265	1.53544	0.411298	0.235025	2.75374	0.195248	0.173384	0.175174	0.486712	0.0890383	0.225919
BASP1	BASP1	BASP1	chr5:17130136-17276954	IPF	CTRL	OK	17.6111	9.69882	0.860604	1.8158	-1.11337	0.01055	0.0407397	yes	IPF vs CONTROL UP	unique	16.0289	18.6566	14.1413	8.5028	29.5708	18.7662	11.2466	7.60549	12.421	8.37913	8.84187
BASP1P1	BASP1P1	BASP1P1	chr13:23471168-23472320	IPF	CTRL	NOTEST	0.781503	0.0138223	5.82119	56.5394	0	1	1	no	IPF vs CONTROL UP	unique	2.14692	1.22229	0.163986	0	1.15582	0	0.0691113	0	0	0	0
BATF	BATF	BATF	chr14:75988783-76013334	IPF	CTRL	OK	3.96816	3.3534	0.242843	1.18332	-0.0501627	0.9041	0.951985	no	IPF vs CONTROL UP	unique	2.02307	3.07147	4.95078	3.75166	6.10693	3.90503	2.43381	4.20221	3.89146	3.74948	2.49006
BATF2	BATF2	BATF2	chr11:64755416-64764517	IPF	CTRL	OK	2.65212	6.09947	-1.20154	-2.29985	1.97136	5e-05	0.000459061	yes	IPF vs CONTROL DOWN	unique	2.61333	2.97553	2.34796	3.45346	1.65471	2.86774	3.85342	8.57711	3.70712	8.27853	6.08119
BATF3	BATF3	BATF3	chr1:212859758-212873327	IPF	CTRL	OK	3.51851	2.35211	0.581006	1.49589	-0.230127	0.58775	0.748976	no	IPF vs CONTROL UP	unique	3.21248	3.29213	1.96482	4.02214	4.15478	4.46469	2.73225	1.00097	3.39886	2.04085	2.58763
BAX	BAX	BAX	chr19:49458116-49465055	IPF	CTRL	OK	17.1863	20.3325	-0.242527	-1.18306	0.774492	0.06555	0.165503	no	IPF vs CONTROL DOWN	unique	19.5284	17.0615	16.7321	19.7439	15.6038	14.4481	20.6015	17.7769	16.9377	27.5867	18.7596
BAZ1A	BAZ1A	BAZ1A	chr14:35221936-35344853	IPF	CTRL	OK	14.1948	10.9387	0.375926	1.29767	-0.478537	0.2638	0.449411	no	IPF vs CONTROL UP	unique	12.7207	15.8498	11.7477	15.7575	17.1311	11.9619	11.8803	10.1375	15.8374	8.58109	8.25696
BAZ1B	BAZ1B	BAZ1B	chr7:72854727-72936615	IPF	CTRL	OK	25.7058	22.6573	0.182116	1.13455	-0.0207059	0.9603	0.980163	no	IPF vs CONTROL UP	unique	22.2021	24.8555	30.7609	26.0803	26.3389	23.997	22.235	23.807	22.5425	20.7675	23.9346
BAZ2A	BAZ2A	BAZ2A	chr12:56915608-57030163	IPF	CTRL	OK	35.5923	33.6494	0.0809837	1.05774	0.10654	0.7925	0.889095	no	IPF vs CONTROL UP	unique	33.1524	38.0934	28.9935	45.0288	31.5107	36.7749	29.913	41.7373	31.2684	33.6931	31.6352
BAZ2B	BAZ2B	BAZ2B	chr2:160175489-160473059	IPF	CTRL	OK	35.3419	22.6465	0.642092	1.56059	-0.902636	0.0347	0.10243	no	IPF vs CONTROL UP	unique	23.3588	43.7855	27.4384	45.4328	32.151	39.8846	23.9698	20.2806	22.8288	20.0719	26.0812
BBC3	BBC3	BBC3	chr19:47724078-47736023	IPF	CTRL	OK	5.93573	8.20126	-0.46642	-1.38168	1.02288	0.01835	0.0632789	no	IPF vs CONTROL DOWN	unique	5.63711	5.83359	5.78072	6.53571	6.60282	5.22443	4.57352	10.7817	6.9552	10.6356	8.06027
BBIP1	BBIP1	BBIP1	chr10:112631552-112679124	IPF	CTRL	OK	9.37014	4.34251	1.10954	2.15777	-0.679969	0.1723	0.335973	no	IPF vs CONTROL UP	unique	8.38469	10.1143	9.33397	9.71535	9.0944	9.57813	5.03861	3.77043	4.675	3.09261	5.13589
BBOX1	BBOX1	BBOX1	chr11:27062508-27149354	IPF	CTRL	NOTEST	0.423117	0.10476	2.01397	4.03893	0	1	1	no	IPF vs CONTROL UP	unique	0.471753	0.537139	0	0.219285	0.946239	0.364287	0.161718	0	0.151354	0	0.210727
BBS1	BBS1	BBS1	chr11:66278118-66301084	IPF	CTRL	OK	15.4877	11.8351	0.388056	1.30863	-0.236258	0.58535	0.746986	no	IPF vs CONTROL UP	unique	15.8355	11.6951	11.1055	13.8608	22.7803	17.649	11.1238	9.87669	11.2905	12.3281	14.5562
BBS10	BBS10	BBS10	chr12:76738265-76742222	IPF	CTRL	OK	6.84755	5.78269	0.243847	1.18415	0.00955012	0.98125	0.99146	no	IPF vs CONTROL UP	unique	6.10603	4.9397	9.63987	5.49599	6.62086	8.28284	6.04536	7.68371	5.18278	4.40776	5.59383
BBS12	BBS12	BBS12	chr4:123653856-123666098	IPF	CTRL	OK	3.10987	1.55494	1	2	-1.13271	0.00685	0.0287135	yes	IPF vs CONTROL UP	unique	1.86987	3.64971	2.06111	2.8587	4.81617	3.40367	1.66948	1.75861	1.11445	1.50327	1.72887
BBS2	BBS2	BBS2	chr16:56518258-56554008	IPF	CTRL	OK	13.4675	11.1278	0.275324	1.21027	-0.364734	0.37975	0.571909	no	IPF vs CONTROL UP	unique	11.3541	16.4532	10.8173	12.1003	19.6785	10.4019	16.8379	7.29574	8.84401	13.3992	9.26196
BBS4	BBS4	BBS4	chr15:72978519-73030817	IPF	CTRL	OK	9.78597	5.08683	0.943948	1.92379	-1.14264	0.0082	0.0330729	yes	IPF vs CONTROL UP	unique	8.50419	9.09674	6.55427	10.8146	14.0334	9.71264	5.76697	4.70976	4.95136	4.56557	5.44049
BBS5	BBS5	BBS5	chr2:170336005-170363165	IPF	CTRL	OK	4.51603	2.79329	0.693089	1.61674	-0.733153	0.0804	0.193361	no	IPF vs CONTROL UP	unique	3.20555	4.37972	1.84116	3.196	9.59359	4.88014	2.54062	2.28489	2.90985	2.36778	3.86331
BBS7	BBS7	BBS7	chr4:122745483-122791652	IPF	CTRL	OK	4.73633	2.83467	0.740589	1.67086	-1.0232	0.019	0.0649585	no	IPF vs CONTROL UP	unique	2.69005	6.34117	4.7429	4.75011	4.44397	5.44976	4.25155	2.92995	2.71747	2.24046	2.03391
BBS9	BBS9	BBS9	chr7:33169151-33645680	IPF	CTRL	OK	24.1201	9.75255	1.30639	2.47322	-1.97952	5e-05	0.000459061	yes	IPF vs CONTROL UP	unique	15.6817	22.3009	14.5292	21.0759	37.0996	34.0336	12.0724	8.57609	6.73514	11.2247	10.1544
BBX	BBX	BBX	chr3:107241782-107530176	IPF	CTRL	OK	16.9995	15.3273	0.149385	1.1091	0.117555	0.78365	0.883231	no	IPF vs CONTROL UP	unique	15.6632	15.3579	19.7566	13.6885	16.1894	21.3413	15.8618	15.9063	15.4581	14.7294	14.681
BCAM	BCAM	BCAM	chr19:45312315-45324678	IPF	CTRL	OK	48.7694	88.8301	-0.865071	-1.82143	2.137	5e-05	0.000459061	yes	IPF vs CONTROL DOWN	unique	58.0216	28.3132	72.1236	24.4334	56.7634	52.9614	70.6912	88.2169	66.9804	112.406	105.856
BCAN	BCAN	BCAN	chr1:156611739-156629324	IPF	CTRL	NOTEST	0.545624	0.22483	1.27907	2.42683	0	1	1	no	IPF vs CONTROL UP	unique	0.350705	0.615735	0.874613	0.520358	0.238935	0.6734	0.106729	0.316708	0.501894	0.0876219	0.111198
BCAP29	BCAP29	BCAP29	chr7:107220421-107263762	IPF	CTRL	OK	8.20347	8.68971	-0.0830735	-1.05927	0.577043	0.17485	0.339155	no	IPF vs CONTROL DOWN	unique	8.32809	7.57075	8.69421	8.11765	6.80729	9.70284	10.8076	8.09077	9.81294	6.94681	7.79043
BCAP31	BCAP31	BCAP31	chrX:152965946-152990201	IPF	CTRL	OK	30.024	37.5246	-0.321724	-1.24982	0.992571	0.02075	0.0694831	no	IPF vs CONTROL DOWN	unique	34.7059	20.3979	39.4777	21.4891	39.6376	24.4356	54.0077	34.8729	27.2775	44.8524	26.6127
BCAR1	BCAR1	BCAR1	chr16:75262927-75301951	IPF	CTRL	OK	17.563	30.7573	-0.808386	-1.75125	2.1496	5e-05	0.000459061	yes	IPF vs CONTROL DOWN	unique	19.3825	21.5782	12.6803	18.5491	15.539	17.6491	16.7264	32.5708	36.0035	30.8105	37.6752
BCAR3	BCAR3	BCAR3	chr1:94027342-94312706	IPF	CTRL	OK	9.12016	9.12494	-0.000755569	-1.00052	0.416757	0.33365	0.526342	no	IPF vs CONTROL DOWN	unique	8.59912	10.1008	7.81473	8.48134	10.94	8.78496	9.55722	10.484	6.8717	9.19359	9.51817
BCAR4	BCAR4	BCAR4	chr16:11913691-11922689	IPF	CTRL	NOTEST	0.0334472	0	Inf	0	0	1	1	no	IPF vs CONTROL UP (0)	unique	0	0	0	0	0.200683	0	0	0	0	0	0
BCAS1	BCAS1	BCAS1	chr20:52560078-52687304	IPF	CTRL	OK	3.84198	1.16481	1.72176	3.29839	-1.62862	0.0348	0.102605	no	IPF vs CONTROL UP	unique	1.4097	6.23138	1.11117	0.463048	9.61015	4.22643	2.19352	0	0.159678	1.74982	1.72101
BCAS2	BCAS2	BCAS2	chr1:115110180-115124265	IPF	CTRL	OK	5.04778	6.68515	-0.405312	-1.32438	0.884938	0.03225	0.097109	no	IPF vs CONTROL DOWN	unique	4.9287	2.9396	6.87987	4.24991	6.66735	4.62123	11.1761	5.60838	7.45222	4.46732	4.72173
BCAS3	BCAS3	BCAS3	chr17:58755171-59470199	IPF	CTRL	OK	20.0218	14.721	0.44369	1.36008	-0.623682	0.1402	0.288024	no	IPF vs CONTROL UP	unique	17.6111	20.6954	13.3379	26.612	23.4394	18.4348	16.1407	15.452	12.9893	16.1514	12.8718
BCAS4	BCAS4	BCAS4	chr20:49411466-49493714	IPF	CTRL	OK	3.8413	3.87247	-0.0116608	-1.00812	-0.0606886	0.8867	0.942574	no	IPF vs CONTROL DOWN	unique	3.07861	4.13761	2.25682	3.08733	6.27638	4.21104	4.3759	2.81488	3.61662	4.58658	3.96838
BCAT1	BCAT1	BCAT1	chr12:24962957-25102393	IPF	CTRL	OK	6.01263	7.94591	-0.402216	-1.32154	1.31757	0.0021	0.0111001	yes	IPF vs CONTROL DOWN	unique	10.1717	4.75719	7.13282	6.63728	2.93223	4.44455	11.3177	7.56682	7.68335	8.78022	4.38144
BCAT2	BCAT2	BCAT2	chr19:49298318-49314320	IPF	CTRL	OK	10.1993	14.6713	-0.524523	-1.43846	0.955854	0.02765	0.0866329	no	IPF vs CONTROL DOWN	unique	13.3568	9.70079	10.8034	11.8759	5.57955	9.8796	16.0672	18.6789	11.2988	14.0254	13.2863
BCCIP	BCCIP	BCCIP	chr10:127512103-127569884	IPF	CTRL	OK	12.7868	11.6668	0.132246	1.096	-0.00682119	0.9884	0.995166	no	IPF vs CONTROL UP	unique	12.0877	13.1359	14.2012	10.685	15.4721	11.1388	12.5149	12.0014	13.2109	9.04012	11.5666
BCDIN3D	BCDIN3D	BCDIN3D	chr12:50222325-50236912	IPF	CTRL	OK	2.75249	1.90559	0.5305	1.44443	-0.459569	0.28375	0.472106	no	IPF vs CONTROL UP	unique	1.2335	2.69691	2.40598	2.47751	3.83819	3.86284	1.79915	2.14218	1.39481	2.03673	2.15507
BCDIN3D-AS1	BCDIN3D-AS1	BCDIN3D-AS1	chr12:50222325-50236912	IPF	CTRL	OK	2.58167	1.02729	1.32946	2.51309	-0.930486	0.0506	0.135647	no	IPF vs CONTROL UP	unique	2.50207	2.1737	1.80424	3.14653	2.87668	2.9868	1.23399	1.44518	0.403337	0.622612	1.43133
BCHE	BCHE	BCHE	chr3:165490691-165555253	IPF	CTRL	OK	9.85695	6.5062	0.599325	1.51501	-0.676686	0.11175	0.244993	no	IPF vs CONTROL UP	unique	6.33087	13.7365	16.2348	4.83327	7.49065	10.5156	5.67833	4.59374	7.12936	6.8093	8.32029
BCKDHA	BCKDHA	BCKDHA	chr19:41903693-41930910	IPF	CTRL	OK	8.47193	17.1848	-1.02037	-2.02844	1.6605	0.00035	0.00252483	yes	IPF vs CONTROL DOWN	unique	9.92043	11.4673	6.76939	7.25514	9.9754	5.44391	14.6754	18.3158	15.5092	17.2891	20.1343
BCKDHB	BCKDHB	BCKDHB	chr6:80816343-81055987	IPF	CTRL	OK	7.53044	6.44695	0.224116	1.16806	-0.29548	0.4899	0.668543	no	IPF vs CONTROL UP	unique	7.50941	7.29157	7.35961	5.08294	7.83799	10.1011	8.07168	6.04563	5.40145	7.78954	4.92647
BCKDK	BCKDK	BCKDK	chr16:31119614-31124112	IPF	CTRL	OK	9.97148	10.3237	-0.0500804	-1.03532	0.341835	0.42235	0.611447	no	IPF vs CONTROL DOWN	unique	10.7939	9.43851	10.6919	7.13038	12.2735	9.50071	12.5684	8.04044	8.77717	11.9397	10.2928
BCL10	BCL10	BCL10	chr1:85731459-85743771	IPF	CTRL	OK	7.24033	8.36339	-0.208032	-1.15511	0.728715	0.08745	0.205807	no	IPF vs CONTROL DOWN	unique	7.45681	7.31019	7.4814	5.96103	8.97031	6.26226	10.7809	6.0072	9.20625	7.81956	8.00306
BCL11A	BCL11A	BCL11A	chr2:60678301-60780633	IPF	CTRL	OK	4.06963	1.68601	1.27128	2.41376	-1.27037	0.00435	0.0199691	yes	IPF vs CONTROL UP	unique	4.75993	4.32871	2.81247	4.31071	4.14383	4.0621	1.72027	1.65261	1.36575	1.40652	2.2849
BCL11B	BCL11B	BCL11B	chr14:99635624-99737822	IPF	CTRL	OK	6.4284	2.85192	1.17253	2.25406	-1.74111	5e-05	0.000459061	yes	IPF vs CONTROL UP	unique	6.84868	5.11064	5.43626	9.05099	5.65309	6.47075	3.10444	3.21136	2.40272	2.65057	2.89051
BCL2	BCL2	BCL2	chr18:60790578-60986613	IPF	CTRL	OK	11.4732	10.2529	0.162228	1.11901	0.00507357	0.98945	0.995744	no	IPF vs CONTROL UP	unique	9.08749	15.2691	10.7685	10.968	12.7376	10.0083	7.81831	11.8814	10.6711	10.1191	10.7747
BCL2A1	BCL2A1	BCL2A1	chr15:80253231-80263643	IPF	CTRL	OK	4.67026	7.10202	-0.604726	-1.52069	0.831797	0.05175	0.137876	no	IPF vs CONTROL DOWN	unique	3.60268	2.46136	3.96899	2.00357	11.8126	4.17238	15.2368	3.36725	8.31518	4.96188	3.62901
BCL2L1	BCL2L1	BCL2L1	chr20:30252260-30310656	IPF	CTRL	OK	46.3916	58.6703	-0.338766	-1.26467	1.23858	0.0035	0.0168376	yes	IPF vs CONTROL DOWN	unique	62.1194	33.4827	38.7595	48.0971	54.434	41.457	43.4015	63.1455	67.0429	65.0297	54.7319
BCL2L10	BCL2L10	BCL2L10	chr15:52401821-52404972	IPF	CTRL	NOTEST	0.208742	0.0692932	1.59093	3.01244	0	1	1	no	IPF vs CONTROL UP	unique	0	0.410235	0.220501	0	0.621714	0	0	0	0.346466	0	0
BCL2L11	BCL2L11	BCL2L11	chr2:111878490-111926022	IPF	CTRL	OK	17.8117	13.3616	0.414734	1.33305	-0.248076	0.5199	0.693856	no	IPF vs CONTROL UP	unique	16.796	23.5585	18.7353	22.1544	13.235	12.3913	15.0452	13.987	14.3317	9.92032	13.5239
BCL2L12	BCL2L12	BCL2L12	chr19:50162825-50177173	IPF	CTRL	OK	2.45533	2.83099	-0.205389	-1.153	0.28461	0.527	0.699266	no	IPF vs CONTROL DOWN	unique	2.29108	1.63475	2.96621	1.90798	3.57308	2.3589	3.0166	1.87866	3.48542	2.33543	3.43885
BCL2L13	BCL2L13	BCL2L13	chr22:18121349-18213621	IPF	CTRL	OK	12.107	13.8766	-0.196814	-1.14616	0.85065	0.0479	0.130534	no	IPF vs CONTROL DOWN	unique	12.3719	11.3916	12.5625	9.72104	12.1749	14.4201	13.0637	14.6099	15.7355	13.9424	12.0316
BCL2L14	BCL2L14	BCL2L14	chr12:12223877-12252627	IPF	CTRL	NOTEST	1.96159	0.87917	1.15781	2.23118	0	1	1	no	IPF vs CONTROL UP	unique	1.89481	1.81567	1.44099	2.2232	2.02308	2.37179	1.19082	0.628306	0.605449	0.612144	1.35913
BCL2L15	BCL2L15	BCL2L15	chr1:114356432-114447741	IPF	CTRL	NOTEST	1.69915	0.380543	2.15868	4.46506	0	1	1	no	IPF vs CONTROL UP	unique	1.95034	1.50216	0.977855	2.08283	1.82116	1.86054	0.441787	0.536718	0.276176	0.302498	0.345537
BCL2L2	BCL2L2	BCL2L2	chr14:23775970-23795394	IPF	CTRL	OK	28.628	33.4659	-0.225267	-1.16899	0.636113	0.14625	0.297029	no	IPF vs CONTROL DOWN	unique	27.5518	27.4364	32.6404	21.8363	25.814	36.4891	25.1606	37.4513	31.8256	38.8353	34.0569
BCL2L2-PABPN1	BCL2L2-PABPN1	BCL2L2-PABPN1	chr14:23775970-23795394	IPF	CTRL	OK	21.8677	16.2231	0.430747	1.34793	-0.131568	0.74725	0.859064	no	IPF vs CONTROL UP	unique	25.8119	21.5086	20.1799	16.0734	18.7481	28.884	16.3894	17.0384	14.8619	18.1054	14.7205
BCL3	BCL3	BCL3	chr19:45251977-45263301	IPF	CTRL	OK	21.9659	33.5189	-0.609707	-1.52595	1.50368	0.0004	0.00281058	yes	IPF vs CONTROL DOWN	unique	22.6102	29.0074	13.6928	21.7593	30.5244	14.2013	22.3526	23.3319	55.7848	38.599	27.526
BCL6	BCL6	BCL6	chr3:187416046-187463513	IPF	CTRL	OK	43.3045	39.5075	0.132388	1.09611	0.0699047	0.86895	0.932845	no	IPF vs CONTROL UP	unique	35.4217	59.1218	37.1363	40.8821	53.6464	33.6185	39.6864	31.924	51.3167	36.4713	38.1393
BCL6B	BCL6B	BCL6B	chr17:6926368-6932961	IPF	CTRL	OK	9.44378	17.8018	-0.914588	-1.88503	2.21692	5e-05	0.000459061	yes	IPF vs CONTROL DOWN	unique	10.6221	9.02401	13.7853	9.58167	6.17245	7.47716	10.0512	18.5165	21.7915	17.3708	21.2791
BCL7A	BCL7A	BCL7A	chr12:122459860-122499950	IPF	CTRL	OK	8.11036	6.76133	0.262459	1.19952	-0.0852325	0.8456	0.919466	no	IPF vs CONTROL UP	unique	8.82628	5.20357	5.61498	6.93054	11.4987	10.5881	5.32329	6.63819	6.44879	7.27417	8.12222
BCL7B	BCL7B	BCL7B	chr7:72950682-72972065	IPF	CTRL	OK	14.6653	21.2052	-0.532012	-1.44594	1.25922	0.0035	0.0168376	yes	IPF vs CONTROL DOWN	unique	14.5676	16.342	15.7552	12.9985	9.91918	18.4093	22.1296	21.3387	22.1654	23.5657	16.8266
BCL7C	BCL7C	BCL7C	chr16:30899115-30905399	IPF	CTRL	OK	13.8429	22.255	-0.684985	-1.60768	1.50062	0.00055	0.0036624	yes	IPF vs CONTROL DOWN	unique	16.4693	16.6222	20.852	9.88585	9.69134	9.5367	19.0194	24.4873	16.1971	22.4095	29.1618
BCL9	BCL9	BCL9	chr1:147013181-147098015	IPF	CTRL	OK	10.8508	6.71082	0.693236	1.61691	-0.970537	0.02035	0.0685681	no	IPF vs CONTROL UP	unique	9.49926	10.6095	8.61805	10.6779	12.4953	13.2046	5.34086	7.57162	4.96572	6.98798	8.68792
BCL9L	BCL9L	BCL9L	chr11:118754474-118781613	IPF	CTRL	OK	31.8062	29.1586	0.125391	1.0908	0.221241	0.6007	0.759346	no	IPF vs CONTROL UP	unique	35.8551	28.1399	24.7608	34.5095	35.4326	32.1396	18.9351	34.7814	31.3326	30.2606	30.4831
BCLAF1	BCLAF1	BCLAF1	chr6:136578000-136610989	IPF	CTRL	OK	34.2321	24.9737	0.454939	1.37072	-0.525597	0.21405	0.390257	no	IPF vs CONTROL UP	unique	32.9126	31.0741	32.474	36.6987	35.2511	36.9822	30.3733	21.0396	25.1935	19.9713	28.291
BCMO1	BCMO1	BCMO1	chr16:81272295-81324747	IPF	CTRL	NOTEST	0.0863793	0.156221	-0.854832	-1.80855	0	1	1	no	IPF vs CONTROL DOWN	unique	0	0.137181	0.0734325	0.168103	0	0.139559	0.185757	0	0.115983	0.317975	0.16139
BCO2	BCO2	BCO2	chr11:112046207-112089649	IPF	CTRL	OK	4.28035	1.97383	1.11673	2.16855	-1.2083	0.0056	0.0243917	yes	IPF vs CONTROL UP	unique	2.59667	3.6957	2.10955	1.96267	10.5001	4.8174	1.57149	1.79989	2.2147	1.0863	3.19677
BCOR	BCOR	BCOR	chrX:39910498-40036582	IPF	CTRL	OK	10.4112	11.9219	-0.195489	-1.14511	0.84935	0.04455	0.123515	no	IPF vs CONTROL DOWN	unique	10.1956	11.1972	8.27605	12.1955	8.58611	12.0165	11.9639	13.7354	11.9175	9.99433	11.9986
BCORL1	BCORL1	BCORL1	chrX:129139163-129192058	IPF	CTRL	OK	5.89799	4.65577	0.341205	1.26681	-0.277303	0.5154	0.6901	no	IPF vs CONTROL UP	unique	5.84268	6.788	4.88651	7.32877	4.60261	5.93938	3.86617	5.20675	4.86089	4.21182	5.13321
BCORP1	BCORP1	BCORP1	chrY:21617316-21665039	IPF	CTRL	NOTEST	0.112531	0.161912	-0.524895	-1.43883	0	1	1	no	IPF vs CONTROL DOWN	unique	0	0	0	0	0	0.675184	0.213851	0.25967	0.160333	0.175708	0
BCR	BCR	BCR	chr22:23522551-23660224	IPF	CTRL	OK	15.8008	20.2034	-0.354603	-1.27863	0.915904	0.03055	0.093288	no	IPF vs CONTROL DOWN	unique	17.7153	17.1999	13.1728	14.0021	17.0028	15.7119	16.4334	19.3966	19.2078	24.4601	21.5193
BCRP2	BCRP2	BCRP2	chr22:21457304-21476575	IPF	CTRL	NOTEST	0	0	0	1	0	1	1	no	IPF vs. CONTROL EQUAL(0)	unique	0	0	0	0	0	0	0	0	0	0	0
BCRP3	BCRP3	BCRP3	chr22:25028881-25055114	IPF	CTRL	OK	1.50177	1.96248	-0.386011	-1.30678	0.429273	0.32655	0.519306	no	IPF vs CONTROL DOWN	unique	1.858	0.72592	1.4178	2.55433	0.999501	1.45508	2.07011	2.40659	1.57693	1.66009	2.09867
BCS1L	BCS1L	BCS1L	chr2:219524378-219528166	IPF	CTRL	OK	11.8094	6.83466	0.788998	1.72787	-0.920345	0.0308	0.0938434	no	IPF vs CONTROL UP	unique	10.8114	15.3877	9.77248	9.84953	13.2375	11.798	8.66578	7.99207	4.20284	6.48332	6.82931
BCYRN1	BCYRN1	BCYRN1	chrX:70430034-70948962	IPF	CTRL	NOTEST	0	0	0	1	0	1	1	no	IPF vs. CONTROL EQUAL(0)	unique	0	0	0	0	0	0	0	0	0	0	0
BDH1	BDH1	BDH1	chr3:197236653-197300194	IPF	CTRL	OK	4.22637	1.44732	1.54604	2.92014	-1.87689	0.00015	0.00122565	yes	IPF vs CONTROL UP	unique	3.82528	5.708	2.42821	3.50829	6.78403	3.10441	2.15935	1.23658	1.39076	0.941367	1.50852
BDH2	BDH2	BDH2	chr4:103998781-104021024	IPF	CTRL	OK	4.51967	3.78509	0.255888	1.19407	0.0464957	0.9156	0.957704	no	IPF vs CONTROL UP	unique	5.26399	4.52338	4.17533	5.68338	2.98508	4.48685	4.87309	4.23283	3.25107	2.77764	3.79084
BDKRB1	BDKRB1	BDKRB1	chr14:96722546-96731100	IPF	CTRL	NOTEST	1.23451	0.345733	1.8362	3.57069	0	1	1	no	IPF vs CONTROL UP	unique	2.1123	2.9396	1.00331	0	0.808163	0.543675	0.241646	0.731528	0.225825	0.372277	0.157391
BDKRB2	BDKRB2	BDKRB2	chr14:96671134-96710666	IPF	CTRL	OK	7.16861	2.75909	1.3775	2.59818	-1.94621	5e-05	0.000459061	yes	IPF vs CONTROL UP	unique	10.9221	8.16082	6.81706	3.90796	6.56153	6.6422	2.33114	1.63218	2.89203	2.73628	4.20384
BDNF	BDNF	BDNF	chr11:27528398-27743605	IPF	CTRL	OK	1.89358	3.18259	-0.749084	-1.68072	1.20426	0.0022	0.0115481	yes	IPF vs CONTROL DOWN	unique	2.06994	1.71628	1.4695	2.23126	1.59151	2.283	2.69897	2.69572	3.71066	3.94739	2.86021
BDNF-AS	BDNF-AS	BDNF-AS	chr11:27528398-27743605	IPF	CTRL	OK	2.17046	1.93266	0.16741	1.12304	0.057055	0.8947	0.946297	no	IPF vs CONTROL UP	unique	1.12328	3.08298	2.5221	2.68243	1.58188	2.03008	1.7062	2.77019	1.34076	2.01409	1.83207
BDP1	BDP1	BDP1	chr5:70751441-70863649	IPF	CTRL	OK	15.0717	12.2186	0.302761	1.2335	-0.287406	0.49955	0.676977	no	IPF vs CONTROL UP	unique	12.1307	16.0409	13.9733	18.4056	14.0011	15.8787	12.0854	13.8819	14.6947	9.04808	11.3831
BEAN1	BEAN1	BEAN1	chr16:66461199-66527432	IPF	CTRL	OK	4.52278	5.13908	-0.1843	-1.13627	0.388437	0.3597	0.552703	no	IPF vs CONTROL DOWN	unique	6.81973	6.10456	3.88959	4.0929	3.98898	2.24094	3.31504	7.36746	5.14896	3.43716	6.4268
BECN1	BECN1	BECN1	chr17:40950853-40976310	IPF	CTRL	OK	16.6907	18.798	-0.171539	-1.12626	0.473226	0.27095	0.45744	no	IPF vs CONTROL DOWN	unique	17.8717	14.4022	15.0692	11.49	22.3879	18.9229	22.0789	20.889	14.5317	21.0762	15.4142
BEGAIN	BEGAIN	BEGAIN	chr14:101003483-101036131	IPF	CTRL	OK	1.76131	1.88441	-0.0974657	-1.06989	0.197645	0.62585	0.778022	no	IPF vs CONTROL DOWN	unique	3.26327	1.23847	1.19309	2.27688	1.58818	1.00796	0.726602	2.26127	2.30379	1.43513	2.69526
BEND2	BEND2	BEND2	chrX:18181050-18239024	IPF	CTRL	NOTEST	0	0.0426204	#NAME?	0	0	1	1	no	IPF vs CONTROL DOWN (0)	unique	0	0	0	0	0	0	0.0475156	0	0.133052	0.0325346	0
BEND3	BEND3	BEND3	chr6:107386384-107435636	IPF	CTRL	OK	2.06765	1.41201	0.550238	1.46433	-0.475687	0.2682	0.454267	no	IPF vs CONTROL UP	unique	2.34197	1.64837	1.45138	1.96281	2.33774	2.6636	1.36614	1.32812	1.43516	1.3919	1.53873
BEND3P3	BEND3P3	BEND3P3	chr10:81442730-81448650	IPF	CTRL	OK	9.65397	7.64816	0.336009	1.26226	-0.258241	0.5399	0.710039	no	IPF vs CONTROL UP	unique	14.7384	7.87102	8.29937	9.05222	9.84352	8.1193	8.31794	9.33343	6.51828	7.16358	6.90759
BEND4	BEND4	BEND4	chr4:42112869-42154895	IPF	CTRL	NOTEST	0.398581	0.383485	0.0557026	1.03937	0	1	1	no	IPF vs CONTROL UP	unique	0.418159	0.549351	0.137011	0.539245	0.524179	0.223542	0.148587	0.200638	0.588567	0.339135	0.640499
BEND5	BEND5	BEND5	chr1:48998526-50489626	IPF	CTRL	OK	3.78834	2.53426	0.580001	1.49485	-0.196229	0.5871	0.748399	no	IPF vs CONTROL UP	unique	2.06535	3.91944	2.80264	1.59837	8.88891	3.45535	2.3035	3.33798	1.9873	2.4265	2.61603
BEND6	BEND6	BEND6	chr6:56819772-56892142	IPF	CTRL	NOTEST	0.736307	0.24797	1.57014	2.96934	0	1	1	no	IPF vs CONTROL UP	unique	1.07851	1.59637	0.328595	0.451517	0.463138	0.499712	0.221667	0.448414	0.311485	0.113834	0.144449
BEND7	BEND7	BEND7	chr10:13480483-13544976	IPF	CTRL	OK	2.94746	4.412	-0.581964	-1.49689	1.0243	0.018	0.0622704	no	IPF vs CONTROL DOWN	unique	2.64197	3.80936	3.33886	2.9482	2.48482	2.46152	3.36	2.99857	4.56757	5.46142	5.67246
BEST1	BEST1	BEST1	chr11:61717355-61735132	IPF	CTRL	OK	5.96757	5.13572	0.216578	1.16197	0.0176059	0.9584	0.979184	no	IPF vs CONTROL UP	unique	3.93879	7.92973	3.57434	10.8532	3.70272	5.80664	6.37972	4.65599	6.3836	4.42911	3.83016
BEST2	BEST2	BEST2	chr19:12863406-12869271	IPF	CTRL	NOTEST	0.06744	0.0750224	-0.153718	-1.11243	0	1	1	no	IPF vs CONTROL DOWN	unique	0	0.176655	0.0946188	0	0.133366	0	0.0398883	0	0.149334	0.0819357	0.103954
BEST3	BEST3	BEST3	chr12:70047388-70093196	IPF	CTRL	NOTEST	0.0194652	0.0311946	-0.6804	-1.60258	0	1	1	no	IPF vs CONTROL DOWN	unique	0	0	0	0	0	0.116791	0.0209408	0	0	0	0.135032
BEST4	BEST4	BEST4	chr1:45249256-45253426	IPF	CTRL	OK	5.44878	1.79903	1.59871	3.02873	-1.69323	0.0004	0.00281058	yes	IPF vs CONTROL UP	unique	2.53073	8.64444	1.28582	2.5494	13.7738	3.9085	4.26435	0.292245	0.676668	0.371168	3.39074
BET1	BET1	BET1	chr7:93620999-93633690	IPF	CTRL	OK	6.95984	3.66471	0.925355	1.89915	-1.18741	0.00695	0.0291005	yes	IPF vs CONTROL UP	unique	4.91763	6.02981	7.77773	6.99587	5.52169	10.5163	5.00404	4.91516	2.36724	2.74439	3.29272
BET1L	BET1L	BET1L	chr11:202923-207422	IPF	CTRL	OK	32.9078	32.8253	0.00362372	1.00251	0.418295	0.32885	0.52154	no	IPF vs CONTROL UP	unique	31.1689	35.122	32.8961	28.3643	35.0002	34.8955	31.0705	34.8753	33.2777	35.1698	29.7331
BET3L	BET3L	BET3L	chr6:116817650-116880031	IPF	CTRL	NOTEST	0.0540945	0.204926	-1.92155	-3.7883	0	1	1	no	IPF vs CONTROL DOWN	unique	0	0	0	0	0	0.324567	0.288724	0.291104	0	0.444804	0
BEX1	BEX1	BEX1	chrX:102317580-102319168	IPF	CTRL	NOTEST	0.176006	1.1701	-2.73293	-6.64805	0	1	1	no	IPF vs CONTROL DOWN	unique	0.372302	0	0.683732	0	0	0	0.864241	0.386614	1.07405	1.77524	1.75033
BEX2	BEX2	BEX2	chrX:102564273-102565974	IPF	CTRL	OK	3.51054	5.18144	-0.561662	-1.47597	0.828884	0.05055	0.135585	no	IPF vs CONTROL DOWN	unique	4.68666	0	3.10909	3.79938	5.39923	4.06887	5.19002	7.17769	6.3907	2.69141	4.4574
BEX4	BEX4	BEX4	chrX:102470019-102472128	IPF	CTRL	OK	15.5594	16.9384	-0.122512	-1.08863	0.649165	0.12655	0.267746	no	IPF vs CONTROL DOWN	unique	14.6346	11.1165	21.9964	12.5129	15.2536	17.8421	17.6823	23.0458	15.8023	12.4856	15.6758
BEX5	BEX5	BEX5	chrX:101408678-101410986	IPF	CTRL	OK	1.31548	2.16635	-0.719671	-1.64681	0.80346	0.06205	0.158703	no	IPF vs CONTROL DOWN	unique	0.789901	1.2735	2.66078	0.548801	1.70512	0.914796	2.24204	2.46075	1.07548	2.93072	2.12274
BFAR	BFAR	BFAR	chr16:14726667-14763093	IPF	CTRL	OK	15.1217	18.3049	-0.27561	-1.21051	0.900112	0.0313	0.0949467	no	IPF vs CONTROL DOWN	unique	16.8417	12.7837	17.4482	14.7416	13.1539	15.7611	19.8949	18.4956	16.4892	19.3791	17.2657
BFSP1	BFSP1	BFSP1	chr20:17474549-17539605	IPF	CTRL	NOTEST	0.475087	0.916895	-0.948564	-1.92995	0	1	1	no	IPF vs CONTROL DOWN	unique	0.399619	0.325561	0.784569	0.598235	0.245732	0.496808	0.882035	0.742971	0.825735	1.17591	0.957825
BFSP2	BFSP2	BFSP2	chr3:133118789-133194056	IPF	CTRL	NOTEST	0.467301	0.0920842	2.34333	5.07471	0	1	1	no	IPF vs CONTROL UP	unique	0.552833	0.419641	0.562195	0.256872	0.158488	0.853777	0.142192	0	0	0.19472	0.123509
BGLAP	BGLAP	BGLAP	chr1:156182778-156217908	IPF	CTRL	OK	0.977605	2.71554	-1.47392	-2.77775	0.237245	0.66555	0.805305	no	IPF vs CONTROL DOWN	unique	2.58256	0	3.78467e-12	1.7879	3.1803e-13	1.49517	2.67534	2.00941	3.10074	2.74768	3.04455
BGN	BGN	BGN	chrX:152713122-152775004	IPF	CTRL	OK	102.02	146.982	-0.526786	-1.44072	1.35227	0.00145	0.00818407	yes	IPF vs CONTROL DOWN	unique	116.255	166.412	115.613	38.7159	85.072	90.0516	99.8217	155.021	153.478	141.223	185.365
BHLHA15	BHLHA15	BHLHA15	chr7:97841565-97842271	IPF	CTRL	OK	3.8692	0.841751	2.20057	4.59661	-1.32873	0.00735	0.030298	yes	IPF vs CONTROL UP	unique	2.82169	8.03274	4.32575	2.61125	4.87918	0.544604	1.45771	0.488188	0	0.998088	1.26477
BHLHA9	BHLHA9	BHLHA9	chr17:1173857-1174565	IPF	CTRL	NOTEST	0	0	0	1	0	1	1	no	IPF vs. CONTROL EQUAL(0)	unique	0	0	0	0	0	0	0	0	0	0	0
BHLHB9	BHLHB9	BHLHB9	chrX:101975641-102007369	IPF	CTRL	OK	3.73867	2.74767	0.444315	1.36067	-0.327644	0.43635	0.623257	no	IPF vs CONTROL UP	unique	3.35484	3.44224	3.90492	3.76419	3.31468	4.65116	2.38869	3.1429	2.56439	2.42309	3.2193
BHLHE22	BHLHE22	BHLHE22	chr8:65492794-65496191	IPF	CTRL	NOTEST	1.78124	1.03989	0.776459	1.71292	0	1	1	no	IPF vs CONTROL UP	unique	2.5468	1.83649	2.32691	1.06657	1.23896	1.67172	1.00293	1.41196	0.653879	1.16444	0.966217
BHLHE23	BHLHE23	BHLHE23	chr20:61637330-61638387	IPF	CTRL	NOTEST	0	0	0	1	0	1	1	no	IPF vs. CONTROL EQUAL(0)	unique	0	0	0	0	0	0	0	0	0	0	0
BHLHE40	BHLHE40	BHLHE40	chr3:5021096-5026865	IPF	CTRL	OK	59.7903	97.9878	-0.712689	-1.63886	1.88684	5e-05	0.000459061	yes	IPF vs CONTROL DOWN	unique	87.4267	74.8741	39.4232	43.0288	74.7414	39.2479	87.989	47.1255	160.346	102.835	91.6433
BHLHE40-AS1	BHLHE40-AS1	BHLHE40-AS1	chr3:4939913-4948186	IPF	CTRL	NOTEST	1.03233	0.877312	0.234744	1.1767	0	1	1	no	IPF vs CONTROL UP	unique	1.2718	0.362037	0.777814	1.76935	1.64475	0.368239	0.491649	0.990711	2.14074	0.336633	0.426829
BHLHE41	BHLHE41	BHLHE41	chr12:26272958-26278003	IPF	CTRL	OK	9.9568	8.28096	0.265884	1.20237	-0.127868	0.7635	0.869775	no	IPF vs CONTROL UP	unique	7.22248	14.196	7.36184	6.79319	13.2471	10.9202	15.4426	6.79681	7.97884	5.33367	5.85289
BHMT	BHMT	BHMT	chr5:78407603-78428113	IPF	CTRL	NOTEST	0.36411	0.140467	1.37414	2.59214	0	1	1	no	IPF vs CONTROL UP	unique	0.350394	0.664924	0.071182	0.32594	0.501641	0.270581	0.120044	0.364198	0	0.0616466	0.156448
BHMT2	BHMT2	BHMT2	chr5:78365546-78385897	IPF	CTRL	OK	3.85634	1.45518	1.40603	2.65008	-1.42462	0.0019	0.0102104	yes	IPF vs CONTROL UP	unique	2.73329	5.9523	2.54648	2.81881	3.98133	5.10582	1.44073	0.988147	2.74718	0.985555	1.11429
BICC1	BICC1	BICC1	chr10:60272903-60588845	IPF	CTRL	OK	11.104	7.62203	0.542839	1.45684	-0.813097	0.05835	0.151438	no	IPF vs CONTROL UP	unique	8.34705	15.5228	10.5089	7.89669	14.5726	9.77624	6.64636	4.91676	10.2685	7.58475	8.69377
BICD1	BICD1	BICD1	chr12:32260184-32531141	IPF	CTRL	OK	6.65383	5.29519	0.329503	1.25658	-0.302768	0.481	0.661582	no	IPF vs CONTROL UP	unique	6.25598	9.70582	4.61094	7.16611	5.35977	6.82436	4.33326	3.65798	6.68695	6.02691	5.77085
BICD2	BICD2	BICD2	chr9:95473644-95527083	IPF	CTRL	OK	16.2688	21.6074	-0.409422	-1.32815	1.21177	0.00435	0.0199691	yes	IPF vs CONTROL DOWN	unique	19.8198	15.272	16.8136	17.1779	14.3642	14.1652	20.5402	23.2506	23.6087	19.788	20.8497
BID	BID	BID	chr22:18216905-18257431	IPF	CTRL	OK	7.2939	7.56781	-0.0531864	-1.03755	0.498509	0.2423	0.423661	no	IPF vs CONTROL DOWN	unique	7.89319	8.99839	7.24534	4.94932	7.53223	7.1449	9.79803	8.97814	5.39248	7.87425	5.79615
BIK	BIK	BIK	chr22:43506753-43525718	IPF	CTRL	OK	5.16464	0.755109	2.77391	6.83959	-1.85314	0.00095	0.00574742	yes	IPF vs CONTROL UP	unique	4.64742	5.29186	3.85834	3.69386	7.72948	5.76689	1.54025	0	0.957825	1.05462	0.222852
BIN1	BIN1	BIN1	chr2:127805598-127864903	IPF	CTRL	OK	7.64067	11.0318	-0.529897	-1.44383	0.768075	0.06895	0.17208	no	IPF vs CONTROL DOWN	unique	6.28115	11.0988	5.8123	7.5686	6.21677	8.86642	9.90245	12.8686	9.31221	13.5997	9.47607
BIN2	BIN2	BIN2	chr12:51674821-51717938	IPF	CTRL	OK	7.19653	7.43923	-0.0478523	-1.03372	0.277095	0.5086	0.685174	no	IPF vs CONTROL DOWN	unique	4.6511	8.92706	6.07583	12.2349	5.59499	5.69531	9.32392	7.32014	9.21015	5.82295	5.51901
BIN3	BIN3	BIN3	chr8:22462144-22526661	IPF	CTRL	OK	15.2972	10.927	0.485374	1.39995	-0.190092	0.6491	0.794338	no	IPF vs CONTROL UP	unique	15.918	16.2936	11.1796	11.6587	22.3927	14.3405	11.4102	12.5322	11.452	10.1904	9.04999
BIRC2	BIRC2	BIRC2	chr11:102217912-102249401	IPF	CTRL	OK	30.1065	20.4069	0.561015	1.47531	-0.837108	0.04855	0.131689	no	IPF vs CONTROL UP	unique	27.2492	31.9882	25.6958	36.0268	29.4266	30.2522	24.9406	18.299	19.9957	19.7323	19.067
BIRC3	BIRC3	BIRC3	chr11:102188180-102210135	IPF	CTRL	OK	20.7405	11.7013	0.825785	1.7725	-1.37391	0.00175	0.00953281	yes	IPF vs CONTROL UP	unique	16.1963	18.6541	24.2574	25.7287	19.9428	19.664	12.1024	8.73966	13.7434	9.15904	14.762
BIRC5	BIRC5	BIRC5	chr17:76210276-76221716	IPF	CTRL	NOTEST	0.8288	0.293527	1.49753	2.82359	0	1	1	no	IPF vs CONTROL UP	unique	1.04546	0.756395	1.06192	0	0.898032	1.21099	0.426693	0.120719	0.335465	0.429172	0.155584
BIRC6	BIRC6	BIRC6	chr2:32582095-32843965	IPF	CTRL	OK	45.8179	26.2965	0.801039	1.74236	-1.11221	0.0116	0.0439541	yes	IPF vs CONTROL UP	unique	42.0782	51.8377	32.8245	59.3221	43.2706	45.5744	30.6078	28.9507	25.2996	23.7977	22.8269
BIRC7	BIRC7	BIRC7	chr20:61867275-61871854	IPF	CTRL	NOTEST	1.08306	1.18856	-0.134092	-1.0974	0	1	1	no	IPF vs CONTROL DOWN	unique	1.61437	2.74868	0	1.92754	0.207796	0	0.932146	0.250755	4.18084	0.255276	0.323768
BIRC8	BIRC8	BIRC8	chr19:53792853-53794875	IPF	CTRL	NOTEST	0.02092	0	Inf	0	0	1	1	no	IPF vs CONTROL UP (0)	unique	0	0	0	0	0.12552	0	0	0	0	0	0
BIVM	BIVM	BIVM	chr13:103436630-103528351	IPF	CTRL	OK	10.5288	6.54993	0.684789	1.60747	-0.521668	0.22955	0.408487	no	IPF vs CONTROL UP	unique	10.752	12.4115	7.407	13.3615	10.243	8.99774	6.65429	7.51484	5.99767	5.72293	6.85991
BIVM-ERCC5	BIVM-ERCC5	BIVM-ERCC5	chr13:103436630-103528351	IPF	CTRL	NOTEST	0.45689	1.0546	-1.20678	-2.30823	0	1	1	no	IPF vs CONTROL DOWN	unique	1.55602e-09	0.000136636	2.7379	0.00329519	4.54681e-06	3.63122e-06	1.24928	1.34612e-07	4.0069	0.00176967	0.0150749
BLCAP	BLCAP	BLCAP	chr20:36145818-36156333	IPF	CTRL	OK	50.4948	33.4194	0.595446	1.51094	-0.71707	0.09605	0.219864	no	IPF vs CONTROL UP	unique	52.667	38.8291	46.7662	46.9106	48.8444	68.9513	33.5033	35.2588	25.4158	33.9244	38.9949
BLID	BLID	BLID	chr11:121959810-122073770	IPF	CTRL	OK	6.02025	3.05771	0.977371	1.96887	-0.402735	0.3476	0.540747	no	IPF vs CONTROL UP	unique	3.35072	11.4462	3.64657	4.65789	3.53438	9.48577	2.97683	3.09292	4.65421	2.56424	2.00037
BLK	BLK	BLK	chr8:11351520-11422108	IPF	CTRL	OK	2.80712	0.507339	2.46807	5.53302	-2.36253	5e-05	0.000459061	yes	IPF vs CONTROL UP	unique	1.68831	4.22902	1.4404	4.39762	2.61022	2.47712	0.954313	0.233979	0.325061	0.118806	0.904536
BLM	BLM	BLM	chr15:91260578-91358686	IPF	CTRL	NOTEST	1.1584	0.389599	1.57207	2.97332	0	1	1	no	IPF vs CONTROL UP	unique	1.38919	1.22221	0.807397	1.05811	1.08375	1.38976	0.518784	0.393871	0.304006	0.266414	0.464921
BLMH	BLMH	BLMH	chr17:28575212-28619184	IPF	CTRL	OK	7.46969	7.9769	-0.0947785	-1.0679	0.421485	0.3168	0.509794	no	IPF vs CONTROL DOWN	unique	5.63574	9.29778	8.27099	7.54286	7.40951	6.66128	8.83606	10.7592	5.42537	8.31644	6.54741
BLNK	BLNK	BLNK	chr10:97951454-98031333	IPF	CTRL	OK	4.30525	1.39526	1.62557	3.08563	-1.5546	0.0003	0.00220617	yes	IPF vs CONTROL UP	unique	3.14654	5.38459	5.48553	4.58748	3.66651	3.56085	3.19185	0.706204	0.94676	1.16667	0.964806
BLOC1S1	BLOC1S1	BLOC1S1	chr12:56109817-56118526	IPF	CTRL	OK	22.7076	40.6909	-0.841534	-1.79195	1.29461	0.0063	0.0268766	yes	IPF vs CONTROL DOWN	unique	23.58	17.1746	35.3832	10.5395	33.0845	16.4836	51.4417	40.1401	32.335	41.0041	38.5337
BLOC1S1-RDH5	BLOC1S1-RDH5	BLOC1S1-RDH5	chr12:56109817-56118526	IPF	CTRL	NOTEST	1.24586	1.41833	-0.187055	-1.13844	0	1	1	no	IPF vs CONTROL DOWN	unique	2.62247e-08	1.81417	0.0147338	2.36043	3.28582	3.02459e-71	2.08703	6.21847e-28	3.22209	5.08098e-38	1.78254
BLOC1S2	BLOC1S2	BLOC1S2	chr10:102033034-102046469	IPF	CTRL	OK	5.56205	6.05157	-0.121692	-1.08801	0.505472	0.2381	0.418734	no	IPF vs CONTROL DOWN	unique	6.77057	5.71941	5.72277	5.25548	4.97086	4.93324	8.42768	5.90239	6.72826	5.17737	4.02217
BLOC1S3	BLOC1S3	BLOC1S3	chr19:45682002-45685058	IPF	CTRL	OK	6.6394	5.84502	0.183844	1.13591	0.00175656	0.9962	0.998013	no	IPF vs CONTROL UP	unique	7.51078	7.40294	6.69477	5.63138	5.58456	7.01194	4.86756	9.20503	3.66922	6.153	5.33029
BLOC1S4	BLOC1S4	BLOC1S4	chr4:6717841-6719387	IPF	CTRL	OK	7.40785	5.1319	0.52956	1.44349	-0.536701	0.2077	0.382357	no	IPF vs CONTROL UP	unique	7.78268	7.08918	7.36179	7.59286	8.53583	6.08473	5.5557	4.85221	4.11931	5.65464	5.47765
BLOC1S5	BLOC1S5	BLOC1S5	chr6:7727010-8102828	IPF	CTRL	OK	5.12932	3.30596	0.633701	1.55154	-0.0706805	0.872	0.93429	no	IPF vs CONTROL UP	unique	2.52676	2.43749	7.24437	5.73731	7.25869	5.57133	1.81004	5.84589	3.42691	3.03664	2.4103
BLOC1S5-TXNDC5	BLOC1S5-TXNDC5	BLOC1S5-TXNDC5	chr6:7727010-8102828	IPF	CTRL	NOTEST	5.33163e-05	0.00199861	-5.22827	-37.4858	0	1	1	no	IPF vs CONTROL DOWN	unique	9.56849e-06	9.26684e-09	2.17241e-11	1.49431e-05	0.000242122	5.3255e-05	9.44075e-09	0.00485778	5.60721e-08	0.00513104	4.149e-06
BLOC1S6	BLOC1S6	BLOC1S6	chr15:45879416-45901909	IPF	CTRL	OK	16.9041	14.6326	0.208184	1.15523	0.0689602	0.87285	0.934672	no	IPF vs CONTROL UP	unique	14.857	15.8378	19.8692	16.6762	17.5649	16.6193	15.6526	15.4447	15.7074	12.5614	13.7969
BLVRA	BLVRA	BLVRA	chr7:43798271-43846941	IPF	CTRL	OK	10.6003	23.1645	-1.12781	-2.18527	1.76413	5e-05	0.000459061	yes	IPF vs CONTROL DOWN	unique	11.5221	6.88779	16.023	3.60824	15.8856	9.67496	23.5967	26.0319	23.2762	28.8078	14.1097
BLVRB	BLVRB	BLVRB	chr19:40953690-40971725	IPF	CTRL	OK	12.8527	31.16	-1.27763	-2.4244	2.10899	5e-05	0.000459061	yes	IPF vs CONTROL DOWN	unique	11.2593	10.684	15.8537	7.30382	23.3223	8.69306	37.8515	28.0608	35.7294	31.2196	22.9388
BLZF1	BLZF1	BLZF1	chr1:169337193-169396670	IPF	CTRL	OK	6.25052	5.73835	0.123339	1.08925	0.00301106	0.99395	0.997175	no	IPF vs CONTROL UP	unique	5.06217	4.89918	7.09697	8.29822	5.11022	7.03635	5.789	5.91909	5.4821	5.14403	6.35754
BMF	BMF	BMF	chr15:40380090-40401085	IPF	CTRL	OK	16.9703	8.28661	1.03415	2.04791	-1.64634	0.0001	0.000852984	yes	IPF vs CONTROL UP	unique	12.5209	18.4197	14.3345	24.7687	12.8718	18.9059	9.30768	10.3723	4.33263	11.1784	6.24205
BMI1	BMI1	BMI1	chr10:22605311-22620414	IPF	CTRL	OK	22.7032	14.7681	0.620416	1.53732	-0.609393	0.15835	0.315804	no	IPF vs CONTROL UP	unique	14.2237	19.7095	33.0171	20.6497	24.1796	24.4398	12.6982	15.115	14.5654	14.1306	17.3312
BMP1	BMP1	BMP1	chr8:22022652-22069840	IPF	CTRL	OK	28.088	26.8621	0.0643835	1.04564	0.189792	0.65915	0.801273	no	IPF vs CONTROL UP	unique	33.6302	40.3805	21.7058	37.4353	14.2921	21.0843	17.8231	24.2799	22.397	26.2994	43.5111
BMP10	BMP10	BMP10	chr2:69092612-69098649	IPF	CTRL	NOTEST	0	0.0195018	#NAME?	0	0	1	1	no	IPF vs CONTROL DOWN (0)	unique	0	0	0	0	0	0	0.097509	0	0	0	0
BMP15	BMP15	BMP15	chrX:50653734-50659641	IPF	CTRL	NOTEST	0.179732	0	Inf	0	0	1	1	no	IPF vs CONTROL UP (0)	unique	0.242668	0	0	0	0.835722	0	0	0	0	0	0
BMP2	BMP2	BMP2	chr20:6748744-6760910	IPF	CTRL	OK	5.29584	31.9565	-2.59318	-6.03428	5.01642	5e-05	0.000459061	yes	IPF vs CONTROL DOWN	unique	5.1407	4.70338	7.9968	7.30365	3.54679	3.0837	34.3304	23.4741	41.0085	32.4505	28.5192
BMP2K	BMP2K	BMP2K	chr4:79697531-79833341	IPF	CTRL	OK	19.9365	14.1712	0.492453	1.40683	-0.678469	0.1136	0.247508	no	IPF vs CONTROL UP	unique	16.1334	24.5417	13.4562	23.2096	20.0511	22.2269	16.7199	11.5701	16.7476	12.9651	12.8531
BMP3	BMP3	BMP3	chr4:81952118-81978685	IPF	CTRL	OK	4.17872	4.95795	-0.24668	-1.18647	0.809109	0.05755	0.149798	no	IPF vs CONTROL DOWN	unique	4.1661	1.86347	4.86075	2.42448	6.12726	5.63028	5.58889	5.10471	3.82067	3.50427	6.77119
BMP4	BMP4	BMP4	chr14:54416454-54423554	IPF	CTRL	OK	12.476	9.87939	0.336665	1.26283	-0.115928	0.78595	0.884442	no	IPF vs CONTROL UP	unique	20.3217	6.46973	13.4464	11.781	10.0692	12.7682	9.09327	12.3469	5.80028	12.4628	9.69372
BMP5	BMP5	BMP5	chr6:55620237-55740375	IPF	CTRL	OK	19.397	18.7255	0.0508339	1.03586	0.0751062	0.8566	0.925316	no	IPF vs CONTROL UP	unique	22.2282	20.6792	32.804	23.2551	4.54215	12.8736	23.549	18.0311	16.8303	17.6031	17.6139
BMP6	BMP6	BMP6	chr6:7727010-8102828	IPF	CTRL	OK	5.09714	6.90213	-0.437353	-1.35412	0.227657	0.56605	0.73235	no	IPF vs CONTROL DOWN	unique	2.82716	6.57817	5.99775	4.89258	5.9173	4.36988	6.81975	8.62977	5.72733	4.24287	9.09092
BMP7	BMP7	BMP7	chr20:55743808-55841707	IPF	CTRL	OK	2.89478	1.42923	1.01822	2.02541	-1.13937	0.0092	0.0364654	yes	IPF vs CONTROL UP	unique	4.41163	1.21523	2.55652	1.39091	2.93139	4.86302	1.13279	1.18353	1.78131	1.23852	1.81
BMP8A	BMP8A	BMP8A	chr1:39957317-40025370	IPF	CTRL	OK	5.13056	3.77513	0.442592	1.35904	-0.377022	0.38765	0.57891	no	IPF vs CONTROL UP	unique	4.95567	5.82156	5.32546	4.732	6.31688	3.63179	3.7384	2.20805	5.89195	2.77305	4.26418
BMP8B	BMP8B	BMP8B	chr1:40204516-40254533	IPF	CTRL	OK	3.04366	1.7848	0.770049	1.70533	-0.408846	0.3407	0.533354	no	IPF vs CONTROL UP	unique	2.28514	3.81598	2.78337	2.76501	4.05367	2.5588	1.70174	2.05878	1.98019	1.24557	1.9377
BMPER	BMPER	BMPER	chr7:33944522-34195484	IPF	CTRL	OK	2.39	4.85389	-1.02213	-2.03092	1.97219	5e-05	0.000459061	yes	IPF vs CONTROL DOWN	unique	2.94769	2.64618	2.65736	3.24576	1.07007	1.77294	3.88549	7.60225	2.67461	6.42694	3.68017
BMPR1A	BMPR1A	BMPR1A	chr10:88516395-88684945	IPF	CTRL	OK	8.04644	6.80852	0.241009	1.18182	0.0103354	0.9826	0.992515	no	IPF vs CONTROL UP	unique	6.28726	8.06466	8.28866	7.99974	7.03661	10.6017	6.5606	7.19768	7.35614	5.41575	7.51244
BMPR1B	BMPR1B	BMPR1B	chr4:95679127-96079601	IPF	CTRL	OK	5.76972	1.97569	1.54615	2.92036	-2.03084	5e-05	0.000459061	yes	IPF vs CONTROL UP	unique	5.77582	5.05272	1.9913	1.84205	10.2391	9.71733	2.11476	1.1518	1.16843	2.12187	3.32158
BMPR2	BMPR2	BMPR2	chr2:203241049-203432474	IPF	CTRL	OK	29.2114	67.8386	-1.21557	-2.32233	2.63182	5e-05	0.000459061	yes	IPF vs CONTROL DOWN	unique	28.8172	27.1027	33.4791	30.1329	26.2708	29.4658	55.7139	79.609	71.9628	65.0195	66.8877
BMS1	BMS1	BMS1	chr10:43277953-43330385	IPF	CTRL	OK	5.84012	5.22474	0.160639	1.11778	-0.072101	0.86335	0.929497	no	IPF vs CONTROL UP	unique	5.19965	5.36009	6.13638	6.47855	6.08698	5.77907	4.95898	5.95399	5.37941	4.87099	4.96032
BMS1P1	BMS1P1	BMS1P1	chr10:48927373-48952629	IPF	CTRL	NOTEST	0.51243	0.242279	1.08068	2.11504	0	1	1	no	IPF vs CONTROL UP	multiple	0.507408	0.115555	0.32956	0.613995	0.841931	0.66613	0.208454	0.105508	0.130307	0.178409	0.588716
BMS1P4	BMS1P4	BMS1P4	chr10:75458908-75490272	IPF	CTRL	OK	9.34783	4.03519	1.212	2.31658	-1.66721	5e-05	0.000459061	yes	IPF vs CONTROL UP	unique	6.9437	9.62481	8.00838	12.631	8.5632	10.3159	5.08357	4.07881	3.34175	2.31166	5.36014
BMS1P6	BMS1P6	BMS1P6	chr10:48185838-48203780	IPF	CTRL	NOTEST	0.0483706	0.0228415	1.08247	2.11766	0	1	1	no	IPF vs CONTROL UP	multiple	0.030415	0	0	0.0849467	0.104398	0.070464	0.00780855	0	0.0292864	0.0160399	0.0610727
BMX	BMX	BMX	chrX:15518899-15574652	IPF	CTRL	NOTEST	0.65359	0.605706	0.109768	1.07906	0	1	1	no	IPF vs CONTROL UP	unique	0.231514	0.790898	1.19949	0	0.895023	0.804613	0.68421	0.240636	0.780158	0.79438	0.529144
BNC1	BNC1	BNC1	chr15:83924654-83953468	IPF	CTRL	NOTEST	0.429248	0.0977587	2.13452	4.3909	0	1	1	no	IPF vs CONTROL UP	unique	0.929488	0.352762	0.264102	0.173063	0.425397	0.430679	0.143181	0.128839	0.0596663	0.0326794	0.124428
BNC2	BNC2	BNC2	chr9:16409500-16870786	IPF	CTRL	OK	9.66887	5.14638	0.90979	1.87877	-1.53668	0.0002	0.00156984	yes	IPF vs CONTROL UP	unique	10.1171	11.5932	10.8286	8.08652	6.903	10.4848	4.0362	5.15783	5.9298	4.55258	6.05548
BNIP1	BNIP1	BNIP1	chr5:172571444-172591390	IPF	CTRL	OK	2.34157	3.27574	-0.484347	-1.39895	0.507378	0.22295	0.400269	no	IPF vs CONTROL DOWN	unique	2.94349	1.52343	1.79931	2.48504	1.88897	3.40917	2.96331	3.33577	4.37641	2.83103	2.8722
BNIP2	BNIP2	BNIP2	chr15:59955061-59981642	IPF	CTRL	OK	25.6537	33.8003	-0.397867	-1.31756	1.20294	0.00515	0.0228188	yes	IPF vs CONTROL DOWN	unique	22.9624	24.032	33.0064	22.6547	27.8928	23.3741	33.3741	38.5731	37.177	31.217	28.6603
BNIP3	BNIP3	BNIP3	chr10:133781203-133795435	IPF	CTRL	OK	10.1594	8.7462	0.216093	1.16158	0.191768	0.65115	0.795634	no	IPF vs CONTROL UP	unique	10.2029	6.47884	10.777	12.579	10.4648	10.4541	10.7512	8.56303	8.11933	7.87988	8.41754
BNIP3L	BNIP3L	BNIP3L	chr8:26240522-26270644	IPF	CTRL	OK	40.5696	40.692	-0.00434469	-1.00302	0.473602	0.261	0.446081	no	IPF vs CONTROL DOWN	unique	44.7774	33.2698	52.6911	30.6806	39.5696	42.4291	47.5414	43.3813	39.8628	34.651	38.0233
BNIPL	BNIPL	BNIPL	chr1:151009028-151020076	IPF	CTRL	OK	5.76446	3.26754	0.818979	1.76416	-0.896621	0.0362	0.105643	no	IPF vs CONTROL UP	unique	7.35318	1.70853	6.14333	6.26958	5.84968	7.26245	5.5933	2.26488	4.06422	1.22298	3.19233
BOC	BOC	BOC	chr3:112931374-113160361	IPF	CTRL	OK	9.85203	3.95757	1.31581	2.48941	-0.948956	0.021	0.0700879	no	IPF vs CONTROL UP	unique	8.29688	8.6437	11.225	9.49802	10.9766	10.472	3.25129	2.62488	4.91612	5.5826	3.41298
BOD1	BOD1	BOD1	chr5:173034147-173043666	IPF	CTRL	OK	13.6563	13.257	0.0428184	1.03012	0.12855	0.7629	0.869222	no	IPF vs CONTROL UP	unique	11.1711	17.5868	13.4451	14.0923	10.9231	14.7195	12.0446	13.0475	11.9143	13.5834	15.695
BOD1L1	BOD1L1	BOD1L1	chr4:13570365-13629328	IPF	CTRL	OK	16.732	15.7487	0.0873786	1.06244	0.20516	0.63115	0.781708	no	IPF vs CONTROL UP	unique	12.7506	19.2042	16.786	19.0097	17.9951	14.6465	16.9561	16.7036	16.3466	13.8927	14.8445
BOD1L2	BOD1L2	BOD1L2	chr18:54814292-54817639	IPF	CTRL	NOTEST	0	0.00909586	#NAME?	0	0	1	1	no	IPF vs CONTROL DOWN (0)	unique	0	0	0	0	0	0	0	0	0	0.0454793	0
BOK	BOK	BOK	chr2:242483800-242513553	IPF	CTRL	OK	15.7963	25.0154	-0.663233	-1.58363	1.76269	5e-05	0.000459061	yes	IPF vs CONTROL DOWN	unique	21.1222	14.2768	16.4929	17.3489	9.3517	16.1852	19.3894	25.8416	23.3926	24.3289	32.1246
BOK-AS1	BOK-AS1	BOK-AS1	chr2:242483800-242513553	IPF	CTRL	NOTEST	0.291785	0.442897	-0.602066	-1.51789	0	1	1	no	IPF vs CONTROL DOWN	unique	0.398267	0.459175	8.06564e-08	0.543534	0.349735	0	0.208144	0.824533	1.18181	2.72379e-08	5.11101e-09
BOLA1	BOLA1	BOLA1	chr1:149871154-149872348	IPF	CTRL	OK	6.56555	6.67561	-0.023985	-1.01676	0.425866	0.3158	0.508617	no	IPF vs CONTROL DOWN	unique	3.74805	6.40175	8.03085	5.21004	9.05749	6.9451	5.80056	9.34104	5.04587	7.14896	6.04163
BOLA2B	BOLA2B	BOLA2B	chr16:30204255-30218248	IPF	CTRL	NOTEST	0.0222814	0	Inf	0	0	1	1	no	IPF vs CONTROL UP (0)	multiple	0	0	0	0	0.133688	0	0	0	0	0	0
BOLA3	BOLA3	BOLA3	chr2:74362527-74375039	IPF	CTRL	OK	2.71326	4.80254	-0.823767	-1.77002	0.530106	0.2198	0.396777	no	IPF vs CONTROL DOWN	unique	7.24909	2.70743	2.93225	1.09487	1.37847	0.917472	6.37499	1.64336	6.84638	3.8008	5.34715
BOLA3-AS1	BOLA3-AS1	BOLA3-AS1	chr2:74375107-74379516	IPF	CTRL	OK	3.42396	2.66669	0.360614	1.28397	-0.176748	0.64955	0.794448	no	IPF vs CONTROL UP	unique	3.45747	3.97096	2.83936	4.67852	1.99846	3.599	2.05465	3.76802	2.56783	2.47091	2.47206
BOLL	BOLL	BOLL	chr2:198591602-198650938	IPF	CTRL	NOTEST	0.32509	0.242921	0.420351	1.33825	0	1	1	no	IPF vs CONTROL UP	unique	0.104687	0	0.127602	0.584572	0.527158	0.606521	0.131413	0.653125	0.100785	0.055244	0.274039
BOP1	BOP1	BOP1	chr8:145486055-145515120	IPF	CTRL	NOTEST	0.691719	0.415647	0.734826	1.6642	0	1	1	no	IPF vs CONTROL UP	unique	0.61681	0.561835	0.977483	0.860562	0.847835	0.285787	0.348707	0.256438	0.35626	0.455822	0.661009
BORA	BORA	BORA	chr13:73302041-73590591	IPF	CTRL	OK	2.84784	1.23624	1.20391	2.30363	-0.516915	0.4173	0.606221	no	IPF vs CONTROL UP	unique	2.62603	3.81568	2.22597	3.05169	1.57936	3.78831	1.76777	1.22703	1.52823	0.970658	0.687524
BPESC1	BPESC1	BPESC1	chr3:138823026-138844005	IPF	CTRL	NOTEST	0	0	0	1	0	1	1	no	IPF vs. CONTROL EQUAL(0)	unique	0	0	0	0	0	0	0	0	0	0	0
BPGM	BPGM	BPGM	chr7:134331530-134364567	IPF	CTRL	OK	7.80825	8.3494	-0.0966739	-1.06931	0.450482	0.28595	0.47462	no	IPF vs CONTROL DOWN	unique	8.20651	6.26755	8.03862	8.13939	10.2063	5.99111	9.28674	9.53661	6.42351	7.66732	8.83282
BPHL	BPHL	BPHL	chr6:3118925-3153432	IPF	CTRL	OK	6.09029	3.33043	0.870803	1.82868	-0.788746	0.0669	0.16821	no	IPF vs CONTROL UP	unique	5.24658	6.19434	4.74931	5.49291	8.18149	6.67712	4.34844	3.02839	2.85667	2.77201	3.64664
BPI	BPI	BPI	chr20:36932551-36965905	IPF	CTRL	NOTEST	0.0699754	0.0475426	0.557626	1.47185	0	1	1	no	IPF vs CONTROL UP	unique	0	0.183285	0.0981802	0	0.138387	0	0.082778	0	0.154935	0	0
BPIFA1	BPIFA1	BPIFA1	chr20:31823801-31831115	IPF	CTRL	OK	9.14234	0.456684	4.3233	20.019	-2.62411	0.12875	0.271082	no	IPF vs CONTROL UP	unique	4.33549	9.21233	0.179506	0	38.0642	3.06249	2.13052	0	0	0.152898	0
BPIFA2	BPIFA2	BPIFA2	chr20:31755959-31769223	IPF	CTRL	NOTEST	0	0.0398548	#NAME?	0	0	1	1	no	IPF vs CONTROL DOWN (0)	unique	0	0	0	0	0	0	0	0	0	0	0.199274
BPIFA3	BPIFA3	BPIFA3	chr20:31805134-31815559	IPF	CTRL	NOTEST	0	0	0	1	0	1	1	no	IPF vs. CONTROL EQUAL(0)	unique	0	0	0	0	0	0	0	0	0	0	0
BPIFA4P	BPIFA4P	BPIFA4P	chr20:31781410-31798268	IPF	CTRL	NOTEST	0	0.0263458	#NAME?	0	0	1	1	no	IPF vs CONTROL DOWN (0)	unique	0	0	0	0	0	0	0.131729	0	0	0	0
BPIFB1	BPIFB1	BPIFB1	chr20:31870940-31897684	IPF	CTRL	OK	265.618	23.9152	3.47336	11.1067	-4.66486	5e-05	0.000459061	yes	IPF vs CONTROL UP	unique	293.32	377.838	45.4191	4.09421	680.154	192.884	60.9042	1.07708	0.997535	34.9491	21.648
BPIFB2	BPIFB2	BPIFB2	chr20:31595383-31611515	IPF	CTRL	NOTEST	0.257353	0.0317336	3.01967	8.1098	0	1	1	no	IPF vs CONTROL UP	unique	0	1.05406	0	0	0.132626	0.357432	0.158668	0	0	0	0
BPIFB3	BPIFB3	BPIFB3	chr20:31643229-31661434	IPF	CTRL	NOTEST	0	0	0	1	0	1	1	no	IPF vs. CONTROL EQUAL(0)	unique	0	0	0	0	0	0	0	0	0	0	0
BPIFB4	BPIFB4	BPIFB4	chr20:31669317-31699557	IPF	CTRL	NOTEST	0	0	0	1	0	1	1	no	IPF vs. CONTROL EQUAL(0)	unique	0	0	0	0	0	0	0	0	0	0	0
BPIFB6	BPIFB6	BPIFB6	chr20:31619453-31631853	IPF	CTRL	NOTEST	0	0	0	1	0	1	1	no	IPF vs. CONTROL EQUAL(0)	unique	0	0	0	0	0	0	0	0	0	0	0
BPIFC	BPIFC	BPIFC	chr22:32809833-32853373	IPF	CTRL	NOTEST	0	0	0	1	0	1	1	no	IPF vs. CONTROL EQUAL(0)	unique	0	0	0	0	0	0	0	0	0	0	0
BPNT1	BPNT1	BPNT1	chr1:220046618-220321383	IPF	CTRL	OK	3.40894	4.1455	-0.282225	-1.21607	0.282441	0.50875	0.685193	no	IPF vs CONTROL DOWN	unique	2.73098	2.43349	4.41438	3.14778	3.87594	3.85106	5.85799	3.57904	3.08622	4.38707	3.8172
BPTF	BPTF	BPTF	chr17:65821779-65980494	IPF	CTRL	OK	27.2496	22.5004	0.276282	1.21107	-0.271719	0.5202	0.694073	no	IPF vs CONTROL UP	unique	21.874	27.7083	25.9905	31.256	28.2909	28.3778	21.795	21.7744	24.879	17.9583	26.0954
BPY2	BPY2	BPY2	chrY:26764150-26785352	IPF	CTRL	NOTEST	0	0	0	1	0	1	1	no	IPF vs. CONTROL EQUAL(0)	multiple	0	0	0	0	0	0	0	0	0	0	0
BPY2C	BPY2C	BPY2C	chrY:27177049-27198251	IPF	CTRL	NOTEST	0	0	0	1	0	1	1	no	IPF vs. CONTROL EQUAL(0)	unique	0	0	0	0	0	0	0	0	0	0	0
BRAF	BRAF	BRAF	chr7:140433812-140624564	IPF	CTRL	OK	8.50023	9.32412	-0.133466	-1.09693	0.50246	0.22815	0.406898	no	IPF vs CONTROL DOWN	unique	8.85681	7.39508	10.9719	10.0264	5.99977	7.75143	10.3897	9.00175	12.2218	7.16587	7.84149
BRAP	BRAP	BRAP	chr12:112079949-112123790	IPF	CTRL	OK	6.85246	6.22905	0.137611	1.10008	0.190076	0.6538	0.797264	no	IPF vs CONTROL UP	unique	6.05593	5.92168	6.20424	7.8587	7.399	7.67523	6.20172	6.96212	5.83096	5.71198	6.43847
BRAT1	BRAT1	BRAT1	chr7:2577443-2595392	IPF	CTRL	OK	14.7568	14.1421	0.0613893	1.04347	0.0710468	0.8685	0.932651	no	IPF vs CONTROL UP	unique	19.0348	15.7619	10.8937	16.1015	14.611	12.138	12.3717	14.19	10.181	18.2611	15.7065
BRCA1	BRCA1	BRCA1	chr17:41196311-41277500	IPF	CTRL	OK	2.24675	1.43062	0.651203	1.57048	-0.61955	0.13935	0.286745	no	IPF vs CONTROL UP	unique	2.071	1.99519	1.17197	2.75484	3.21134	2.27616	1.29122	1.57388	1.22726	1.03591	2.02481
BRCA2	BRCA2	BRCA2	chr13:32889616-32973809	IPF	CTRL	OK	2.01597	0.907312	1.1518	2.22191	-1.5993	0.00035	0.00252483	yes	IPF vs CONTROL UP	unique	1.5085	2.3651	2.04642	2.48775	1.65412	2.03393	1.35794	0.848504	1.02407	0.495315	0.810732
BRCC3	BRCC3	BRCC3	chrX:154299694-154351349	IPF	CTRL	OK	4.90109	3.6738	0.415828	1.33406	-0.161299	0.7109	0.836006	no	IPF vs CONTROL UP	unique	4.27063	4.05158	4.70921	5.53425	4.71568	6.12517	4.46778	2.74759	5.09078	2.52196	3.5409
BRD1	BRD1	BRD1	chr22:50166936-50218452	IPF	CTRL	OK	21.6421	21.0166	0.0423115	1.02976	0.286274	0.4997	0.676977	no	IPF vs CONTROL UP	unique	19.1025	24.8565	16.7665	27.3682	20.2776	21.4812	20.1906	21.2774	21.9767	18.3495	23.2887
BRD2	BRD2	BRD2	chr6_ssto_hap7:4367204-4430060	IPF	CTRL	OK	8.27299	9.13529	-0.143042	-1.10423	0.725872	0.08915	0.208738	no	IPF vs CONTROL DOWN	multiple	8.09194	8.812	6.68157	9.81119	7.99451	8.24673	9.0811	9.76863	9.51793	8.29469	9.01411
BRD3	BRD3	BRD3	chr9:136890560-136933141	IPF	CTRL	OK	12.7276	14.4979	-0.187885	-1.13909	0.63145	0.14385	0.293414	no	IPF vs CONTROL DOWN	unique	11.6146	13.0214	12.8058	12.1951	11.8352	14.8934	12.7831	16.3746	10.352	16.2719	16.7079
BRD4	BRD4	BRD4	chr19:15348300-15391262	IPF	CTRL	OK	34.1516	40.5728	-0.248558	-1.18802	0.956774	0.0246	0.0794257	no	IPF vs CONTROL DOWN	unique	36.3981	37.0883	31.1643	34.6169	32.2796	33.3624	31.343	37.5551	47.8087	38.9965	47.1605
BRD7	BRD7	BRD7	chr16:50352928-50402845	IPF	CTRL	OK	4.41252	4.36265	0.0163985	1.01143	0.502006	0.23925	0.420318	no	IPF vs CONTROL UP	unique	2.91851	3.61224	5.33911	4.07163	4.79839	5.73526	4.66163	4.88231	4.39854	3.27944	4.59134
BRD7P3	BRD7P3	BRD7P3	chr6:118781934-119031238	IPF	CTRL	OK	5.05551	3.70673	0.447711	1.36387	-0.13666	0.7415	0.855195	no	IPF vs CONTROL UP	unique	4.74953	5.27256	5.64461	6.79257	3.05995	4.81383	3.63073	3.45562	5.258	3.00828	3.181
BRD8	BRD8	BRD8	chr5:137475458-137514358	IPF	CTRL	OK	13.8527	10.1881	0.443282	1.35969	-0.713743	0.0979	0.222786	no	IPF vs CONTROL UP	unique	10.8479	17.4244	14.7959	13.7179	12.7793	13.5507	10.9954	11.1491	10.1538	8.74475	9.89738
BRD9	BRD9	BRD9	chr5:863849-892939	IPF	CTRL	OK	16.8837	12.8615	0.392578	1.31274	-0.314117	0.46215	0.645621	no	IPF vs CONTROL UP	unique	17.1208	18.6655	11.2691	23.3688	16.1425	14.7356	13.0997	11.1613	13.1025	12.1598	14.784
BRDT	BRDT	BRDT	chr1:92414927-92479985	IPF	CTRL	NOTEST	0.0157652	0.0303653	-0.945685	-1.9261	0	1	1	no	IPF vs CONTROL DOWN	unique	0	0	0.094591	0	0	0	0	0.0998394	0	0	0.0519873
BRE	BRE	BRE	chr2:28004265-28561767	IPF	CTRL	OK	17.436	11.1606	0.643658	1.56229	-0.629511	0.14215	0.290965	no	IPF vs CONTROL UP	unique	10.6554	20.5893	19.2601	14.5708	17.6917	21.8489	16.2779	6.73365	11.891	11.6777	9.22273
BRE-AS1	BRE-AS1	BRE-AS1	chr2:28004265-28561767	IPF	CTRL	OK	2.44391	5.38052	-1.13855	-2.2016	0.838365	0.11785	0.254571	no	IPF vs CONTROL DOWN	unique	1.44275	2.66943	2.21194	2.55148	3.2812	2.50666	6.38642	1.49924	9.00128	6.35532	3.66032
BREA2	BREA2	BREA2	chr8:144779284-144780583	IPF	CTRL	NOTEST	1.48262	1.77299	-0.258042	-1.19585	0	1	1	no	IPF vs CONTROL DOWN	unique	1.56829	1.42859	1.15088	1.30918	1.62242	1.81634	1.69743	2.93205	0.603392	2.15844	1.47366
BRF1	BRF1	BRF1	chr14:105675622-105864484	IPF	CTRL	OK	18.7059	15.3857	0.281898	1.21579	-0.0335944	0.93865	0.968888	no	IPF vs CONTROL UP	unique	19.2378	18.4171	11.8046	23.9292	22.6805	16.1659	13.2962	14.043	14.2939	15.0683	20.2272
BRF2	BRF2	BRF2	chr8:37654400-37707431	IPF	CTRL	OK	6.19292	7.86102	-0.344096	-1.26936	0.332341	0.43215	0.619478	no	IPF vs CONTROL DOWN	unique	5.02349	8.57961	5.8561	6.80011	5.0795	5.81874	6.98858	8.90609	9.52841	7.64584	6.23619
BRI3	BRI3	BRI3	chr7:97910978-98030427	IPF	CTRL	OK	67.8177	124.758	-0.879394	-1.8396	1.41216	0.00225	0.0117535	yes	IPF vs CONTROL DOWN	unique	78.5591	68.3838	70.2961	69.7149	56.1248	63.8276	112.411	131.96	102.818	168.543	108.056
BRI3BP	BRI3BP	BRI3BP	chr12:125478193-125510349	IPF	CTRL	OK	4.1243	3.14319	0.391921	1.31214	-0.155078	0.71675	0.839193	no	IPF vs CONTROL UP	unique	4.33032	3.01317	4.40798	3.35069	4.34951	5.29415	3.65379	2.24946	3.70353	3.68906	2.42011
BRICD5	BRICD5	BRICD5	chr16:2255177-2261069	IPF	CTRL	OK	2.35014	2.27046	0.0497635	1.0351	0.0815144	0.84585	0.919671	no	IPF vs CONTROL UP	unique	1.75879	2.94619	2.44889	2.50037	2.79643	1.6502	1.89181	0.731253	2.84237	1.32157	4.56531
BRIP1	BRIP1	BRIP1	chr17:59756546-59940920	IPF	CTRL	NOTEST	0.320083	0.170232	0.910944	1.88028	0	1	1	no	IPF vs CONTROL UP	unique	0.588505	0.315316	0.316014	0.241805	0.17815	0.28071	0.168799	0.215954	0.166685	0.0912466	0.208476
BRIX1	BRIX1	BRIX1	chr5:34915819-34925787	IPF	CTRL	OK	5.75633	4.41877	0.381504	1.3027	-0.124022	0.77335	0.875924	no	IPF vs CONTROL UP	unique	7.21098	4.10533	9.68916	3.34781	5.1735	5.01118	7.67251	4.49504	2.31271	4.06716	3.54642
BRK1	BRK1	BRK1	chr3:10157332-10168874	IPF	CTRL	OK	46.8879	53.3898	-0.187347	-1.13867	0.704082	0.09955	0.225491	no	IPF vs CONTROL DOWN	unique	49.0509	35.2431	58.6573	24.4697	55.576	58.3304	53.7654	67.0339	43.6576	59.3826	43.1093
BRMS1	BRMS1	BRMS1	chr11:66104803-66112582	IPF	CTRL	OK	6.64834	9.12949	-0.45754	-1.3732	0.744021	0.0821	0.196451	no	IPF vs CONTROL DOWN	unique	5.47529	6.23431	7.13367	5.86877	8.15417	7.02382	13.3296	10.9405	7.29527	8.57555	5.50652
BRMS1L	BRMS1L	BRMS1L	chr14:36295596-36341169	IPF	CTRL	OK	3.54499	2.67058	0.408628	1.32742	-0.108411	0.80085	0.893819	no	IPF vs CONTROL UP	unique	3.15916	3.8539	3.91916	2.99133	3.29495	4.05144	2.81193	1.52456	4.34467	2.85827	1.81347
BROX	BROX	BROX	chr1:222885905-222906106	IPF	CTRL	OK	8.05542	10.0345	-0.316942	-1.24569	0.348168	0.41855	0.607513	no	IPF vs CONTROL DOWN	unique	7.46814	4.04919	9.87189	7.43651	10.8566	8.6502	16.4171	7.94542	7.18747	7.42089	11.2018
BRPF1	BRPF1	BRPF1	chr3:9773433-9789699	IPF	CTRL	OK	7.81712	8.0126	-0.0356346	-1.02501	0.433453	0.3157	0.508564	no	IPF vs CONTROL DOWN	unique	8.24769	6.00701	6.54674	10.5013	8.29419	7.30577	7.37995	9.1416	7.4745	7.64363	8.42334
BRPF3	BRPF3	BRPF3	chr6:36164549-36200567	IPF	CTRL	OK	11.277	10.7131	0.0740172	1.05264	0.280682	0.51195	0.687547	no	IPF vs CONTROL UP	unique	10.6135	9.77471	10.8537	12.7159	11.5738	12.1306	10.207	9.416	12.4006	10.2719	11.2698
BRS3	BRS3	BRS3	chrX:135570124-135574598	IPF	CTRL	NOTEST	0.0905068	0	Inf	0	0	1	1	no	IPF vs CONTROL UP (0)	unique	0	0.244207	0	0.298834	0	0	0	0	0	0	0
BRSK1	BRSK1	BRSK1	chr19:55795533-55823903	IPF	CTRL	OK	2.08704	0.577746	1.85295	3.61238	-1.6588	5e-05	0.000459061	yes	IPF vs CONTROL UP	unique	1.69078	4.59883	1.4306	1.31109	1.53241	1.95852	0.699698	0.390564	0.723475	0.446051	0.628943
BRSK2	BRSK2	BRSK2	chr11:1411128-1483919	IPF	CTRL	NOTEST	1.56303	1.51886	0.0413526	1.02908	0	1	1	no	IPF vs CONTROL UP	unique	1.51816	2.47187	1.10876	1.05994	1.30281	1.91663	0.881874	2.40979	0.852699	1.61894	1.83101
BRWD1	BRWD1	BRWD1	chr21:40557403-40685712	IPF	CTRL	OK	44.264	24.6534	0.844347	1.79545	-0.783605	0.0632	0.160748	no	IPF vs CONTROL UP	unique	50.2378	46.7886	37.166	51.1434	33.8315	46.4167	27.7946	27.6302	22.4165	21.591	23.8347
BRWD1-AS1	BRWD1-AS1	BRWD1-AS1	chr21:40687632-40695144	IPF	CTRL	NOTEST	0.281528	0.092752	1.60183	3.03528	0	1	1	no	IPF vs CONTROL UP	unique	0	0	0.295934	0	0.834496	0.558738	0	0	0.46376	0	0
BRWD1-IT2	BRWD1-IT2	BRWD1-IT2	chr21:40685860-40686888	IPF	CTRL	NOTEST	1.23293	0.927748	0.410283	1.32895	0	1	1	no	IPF vs CONTROL UP	unique	0	2.77597	0.372666	1.69618	0.788023	1.76473	0.549655	0.633068	1.46566	0.967759	1.0226
BRWD3	BRWD3	BRWD3	chrX:79924986-80065233	IPF	CTRL	OK	7.39992	5.68766	0.379675	1.30105	-0.448556	0.28385	0.472221	no	IPF vs CONTROL UP	unique	6.83747	6.75853	7.35727	8.26348	6.95658	8.22621	6.23911	5.87485	5.39915	5.36514	5.56006
BSCL2	BSCL2	BSCL2	chr11:62457733-62494857	IPF	CTRL	OK	19.8524	7.99366	1.31238	2.48351	-0.71016	0.19785	0.369572	no	IPF vs CONTROL UP	unique	21.9615	13.2388	13.1342	12.4748	34.9002	23.4048	10.568	5.53194	4.99402	12.8341	6.04026
BSDC1	BSDC1	BSDC1	chr1:32830704-32860062	IPF	CTRL	OK	29.5835	35.5668	-0.26574	-1.20225	0.991666	0.02035	0.0685681	no	IPF vs CONTROL DOWN	unique	28.2354	30.081	32.6688	30.4621	26.5145	29.5392	34.6156	38.084	31.525	37.1072	36.5024
BSG	BSG	BSG	chr19:571276-583493	IPF	CTRL	OK	83.3922	114.726	-0.460211	-1.37574	1.40851	0.00085	0.00525792	yes	IPF vs CONTROL DOWN	unique	94.4427	74.3393	100.48	49.2534	88.7235	93.1141	122.41	116.606	101.369	124.696	108.55
BSN	BSN	BSN	chr3:49591921-49708982	IPF	CTRL	NOTEST	1.1018	1.09375	0.0105824	1.00736	0	1	1	no	IPF vs CONTROL UP	unique	1.16112	1.22184	0.599387	1.3029	0.980496	1.34506	0.735741	1.4268	1.05047	1.01991	1.23582
BSN-AS2	BSN-AS2	BSN-AS2	chr3:49586738-49591799	IPF	CTRL	NOTEST	0.141995	0.0357471	1.98995	3.97222	0	1	1	no	IPF vs CONTROL UP	unique	0.111966	0.254966	0.136463	0.156239	0.192338	0	0.0287673	0	0	0	0.149968
BSND	BSND	BSND	chr1:55464616-55474465	IPF	CTRL	NOTEST	0.0318172	0.286838	-3.17236	-9.01519	0	1	1	no	IPF vs CONTROL DOWN	unique	0	0	0	0	0.190903	0	0.171251	0.230466	0	0.586285	0.446187
BSPH1	BSPH1	BSPH1	chr19:48471302-48495427	IPF	CTRL	NOTEST	0	0	0	1	0	1	1	no	IPF vs. CONTROL EQUAL(0)	unique	0	0	0	0	0	0	0	0	0	0	0
BSPRY	BSPRY	BSPRY	chr9:116111811-116133513	IPF	CTRL	OK	3.64981	4.43671	-0.28167	-1.2156	0.736427	0.08605	0.203365	no	IPF vs CONTROL DOWN	unique	3.49278	2.27248	2.58516	4.17682	5.03688	4.33475	4.32755	3.50062	5.16348	4.34592	4.846
BST1	BST1	BST1	chr4:15704572-15733796	IPF	CTRL	OK	2.01693	2.62593	-0.380669	-1.30195	0.420865	0.3208	0.513829	no	IPF vs CONTROL DOWN	unique	3.2634	2.09012	2.61434	1.13692	1.57933	1.41745	6.19212	1.27159	0.588826	2.4792	2.59791
BST2	BST2	BST2	chr19:17513754-17516384	IPF	CTRL	OK	32.6122	86.2312	-1.4028	-2.64414	2.89696	5e-05	0.000459061	yes	IPF vs CONTROL DOWN	unique	28.3573	22.2951	52.6661	40.3789	30.863	21.1127	52.3036	124.115	57.1437	120.308	77.2857
BSX	BSX	BSX	chr11:122848356-122852379	IPF	CTRL	NOTEST	0	0	0	1	0	1	1	no	IPF vs. CONTROL EQUAL(0)	unique	0	0	0	0	0	0	0	0	0	0	0
BTAF1	BTAF1	BTAF1	chr10:93683735-93790080	IPF	CTRL	OK	37.3452	20.7571	0.84732	1.79916	-1.32758	0.0016	0.00886554	yes	IPF vs CONTROL UP	unique	35.1041	35.0179	26.1924	54.8845	37.5707	35.3015	23.361	21.6387	25.4309	16.4909	16.8638
BTBD1	BTBD1	BTBD1	chr15:83685180-83736167	IPF	CTRL	OK	19.039	15.9408	0.256239	1.19436	-0.188454	0.65465	0.797723	no	IPF vs CONTROL UP	unique	19.0636	14.4954	18.4949	15.0026	28.7793	18.3985	17.467	14.4126	15.631	14.8611	17.3322
BTBD10	BTBD10	BTBD10	chr11:13409555-13484838	IPF	CTRL	OK	11.2258	8.05561	0.478759	1.39354	-0.430236	0.31805	0.510883	no	IPF vs CONTROL UP	unique	11.0634	10.4751	10.3621	12.3496	11.5039	11.601	9.54545	7.98893	8.29605	8.05204	6.39559
BTBD11	BTBD11	BTBD11	chr12:107712196-108053419	IPF	CTRL	NOTEST	1.62339	0.669815	1.27717	2.42363	0	1	1	no	IPF vs CONTROL UP	unique	2.13224	2.41697	0.674176	1.5859	2.24478	0.686261	0.653766	1.02651	0.475388	0.598708	0.594705
BTBD16	BTBD16	BTBD16	chr10:124030820-124097676	IPF	CTRL	NOTEST	0.452652	0.15383	1.55706	2.94254	0	1	1	no	IPF vs CONTROL UP	unique	0.160695	0	0.68607	0.896307	0.41444	0.558398	0.206586	0	0.154667	0.084871	0.323027
BTBD17	BTBD17	BTBD17	chr17:72352554-72357958	IPF	CTRL	NOTEST	0.284776	0.0422066	2.75429	6.7472	0	1	1	no	IPF vs CONTROL UP	unique	0.178154	0.811391	0	0	0.306409	0.412704	0.0916359	0	0	0	0.119397
BTBD18	BTBD18	BTBD18	chr11:57479994-57586652	IPF	CTRL	OK	6.68537	4.84417	0.464757	1.38008	-0.0728968	0.85485	0.924745	no	IPF vs CONTROL UP	unique	8.16903	6.70544	4.62948	8.75038	4.48589	7.37201	3.80627	5.33188	4.75544	3.45824	6.86904
BTBD19	BTBD19	BTBD19	chr1:45274153-45279801	IPF	CTRL	OK	10.1905	9.23061	0.14272	1.10398	0.0455241	0.91285	0.956186	no	IPF vs CONTROL UP	unique	8.59946	14.5784	6.64706	14.9158	8.87629	7.52571	14.1571	5.36151	9.01143	8.78475	8.83826
BTBD2	BTBD2	BTBD2	chr19:1985446-2015702	IPF	CTRL	OK	24.6409	30.2245	-0.294664	-1.2266	1.08444	0.011	0.0421231	yes	IPF vs CONTROL DOWN	unique	27.1561	24.2034	24.8229	21.7427	28.3909	21.5293	23.8195	30.3088	24.1072	34.9489	37.938
BTBD3	BTBD3	BTBD3	chr20:11871476-11907243	IPF	CTRL	OK	21.2788	15.8006	0.429435	1.34671	-0.452898	0.2883	0.477213	no	IPF vs CONTROL UP	unique	17.5389	21.7466	15.556	20.4554	27.8579	24.5178	15.4707	15.9852	15.536	14.6227	17.3884
BTBD6	BTBD6	BTBD6	chr14:105675622-105864484	IPF	CTRL	OK	27.0472	24.0211	0.171177	1.12598	0.056079	0.896	0.947473	no	IPF vs CONTROL UP	unique	26.3331	24.2235	22.6801	29.8786	34.5251	24.6427	23.4445	21.4919	22.769	27.1822	25.2178
BTBD7	BTBD7	BTBD7	chr14:93703895-93799385	IPF	CTRL	OK	19.6666	14.6815	0.42175	1.33955	-0.2709	0.527	0.699266	no	IPF vs CONTROL UP	unique	17.8786	19.6773	17.4525	21.2876	19.0533	22.6503	14.3229	17.0329	14.9412	11.8096	15.3008
BTBD8	BTBD8	BTBD8	chr1:92545861-92613401	IPF	CTRL	OK	2.81859	2.03826	0.46764	1.38285	-0.450883	0.2868	0.475614	no	IPF vs CONTROL UP	unique	0.836035	3.80771	3.44477	4.3686	2.51776	1.93668	1.66712	2.82322	1.81014	2.20933	1.68147
BTBD9	BTBD9	BTBD9	chr6:38136226-38607924	IPF	CTRL	OK	16.0156	14.3791	0.155503	1.11381	0.119002	0.7827	0.88262	no	IPF vs CONTROL UP	unique	15.9367	12.1947	13.9488	20.1744	18.2202	15.6186	14.8061	14.337	12.2663	14.4932	15.9928
BTC	BTC	BTC	chr4:75671447-75719882	IPF	CTRL	OK	3.30316	2.87962	0.197972	1.14708	0.017898	0.9641	0.982255	no	IPF vs CONTROL UP	unique	4.14777	2.36139	3.79927	3.5309	2.77692	3.20274	3.262	2.63353	2.66067	4.14215	1.69974
BTD	BTD	BTD	chr3:15643254-15687325	IPF	CTRL	OK	8.73458	10.9749	-0.329394	-1.25649	0.960527	0.0228	0.0749397	no	IPF vs CONTROL DOWN	unique	7.71278	7.48075	10.0149	6.97255	11.2927	8.93378	11.6383	9.64874	8.2489	13.9518	11.3866
BTF3	BTF3	BTF3	chr5:72794249-72801448	IPF	CTRL	OK	46.056	50.6788	-0.137993	-1.10037	0.825478	0.05285	0.140288	no	IPF vs CONTROL DOWN	unique	48.3837	36.308	55.1493	34.8171	60.5922	41.086	60.5531	47.8266	53.6686	46.4819	44.864
BTF3L4	BTF3L4	BTF3L4	chr1:52521856-52556388	IPF	CTRL	OK	11.949	6.82718	0.807523	1.7502	-1.04195	0.0154	0.0549187	no	IPF vs CONTROL UP	unique	12.3031	7.84757	11.531	10.3439	11.3873	18.2809	7.60738	7.56697	6.38837	6.14889	6.4243
BTF3P11	BTF3P11	BTF3P11	chr13:77502584-77503224	IPF	CTRL	NOTEST	0.178475	0.0562062	1.66692	3.17537	0	1	1	no	IPF vs CONTROL UP	unique	0	0	0	0	0.458039	0.612813	0	0	0	0.281031	0
BTG1	BTG1	BTG1	chr12:92378751-92539673	IPF	CTRL	OK	56.4134	49.5253	0.187874	1.13908	0.0929213	0.8236	0.907794	no	IPF vs CONTROL UP	unique	59.1508	51.2923	69.1296	57.7954	54.3725	46.74	49.2568	52.1012	52.1361	46.6145	47.5177
BTG2	BTG2	BTG2	chr1:203274663-203278729	IPF	CTRL	OK	135.643	213.887	-0.657032	-1.57683	1.67541	0.00025	0.00189363	yes	IPF vs CONTROL DOWN	unique	118.364	181.564	114.236	100.335	177.045	122.314	299.267	117.454	197.63	267.017	188.065
BTG3	BTG3	BTG3	chr21:18965967-18985268	IPF	CTRL	OK	12.8427	18.4144	-0.519883	-1.43384	1.29525	0.0036	0.0172093	yes	IPF vs CONTROL DOWN	unique	12.6077	8.2367	16.5269	13.245	13.5127	12.9272	19.4089	14.4945	21.2815	23.0946	13.7923
BTG4	BTG4	BTG4	chr11:111338255-111383079	IPF	CTRL	OK	1.79361	0.631128	1.50686	2.84191	-1.32641	0.00475	0.021416	yes	IPF vs CONTROL UP	unique	1.23929	1.76391	0	0.431082	3.7391	3.58828	0.798372	0.321805	0	0.163994	1.87147
[truncated: 21,831 more rows]

## Sheet: 15149 identified genes
test_id	sample_1	sample_2	status	value_1	value_2	log2(fold_change)	fold_change	test_stat	p_value	q_value	significant
[truncated: 15,149 more rows]

[truncated: 1 more sheets: 4131 significant genes]
